# Supplementary material for: Adoptive cell therapy targeting common p53 neoantigens in human solid cancers
Source: Research Square preprint supplement (doi:10.21203/rs.3.rs-916555/v1), 2021-09-24
Supplement: Supplementary file 1 [file 44923eb069476858d9449cc0.xlsx]

## Sheet: Supplementary Table 1
Supplementary Table 1. Characteristics of patients screened for p53 neoantigens
Patient #	Tumor type	Identifier	transcript	exon	cDNA	AA	Gender	Age
1	RECTAL	3942	NM_000546	exon8	c.C817T	p.R273C	Female	46
2	ESOPHAGEAL	3948	NM_000546	exon5	c.G527T	p.C176F	Male	48
3	COLON	4032	NM_000546	exon8	c.G814A	p.V272M	Male	48
4	BREAST	4062	NM_000546	exon4	c.T332G	p.L111R	Female	60
5	OVARIAN	4067	NM_000546	exon7	c.T737G	p.M246R	Female	60
6	GASTRIC	4078	NM_000546	exon6	c.C577A	p.H193N	Male	48
7	COLON	4090, 4158	NM_000546	exon8	c.G814A	p.V272M	Female	50
8	COLON	4095, 4191	NM_000546	exon8	c.C844T	p.R282W	Female	49
9	COLON	4108	NM_000546	exon5	c.C455T	p.P152L	Female	47
10	CHOLANGIOCARCINOMA	4110	NM_000546	exon8	c.A840T	p.R280S	Female	67
11	PANCREATIC	4114, 4288	NM_000546	exon5	c.T403C	p.C135R	Female	45
12	CHOLANGIOCARCINOMA	4115	NM_000546	exon5	c.C476A	p.A159D	Female	58
13	OVARIAN	4127	NM_000546	exon7	c.G733A	p.G245S	Female	58
14	BREAST	4130	NM_000546	exon8	c.G818A	p.R273H	Female	64
15	COLON	4141	NM_000546	exon5	c.G524A	p.R175H	Male	51
16	OVARIAN	4149	NM_000546	exon6	c.A659G	p.Y220C	Female	38
17	COLON	4160	NM_000546	exon8	c.G818A	p.R273H	Female	34
18	COLON	4166	NM_000546	exon7	c.C742T	p.R248W	Female	45
19	COLON	4196, 4249	NM_000546	exon5	c.G524A	p.R175H	Female	36
20	COLON	4213	NM_000546	exon7	c.G743A	p.R248Q	Male	64
21	COLON	4217	NM_000546	exon5	c.G524A	p.R175H	Male	49
22	COLON	4238, 4282	NM_000546	exon7	c.G743A	p.R248Q	Male	62
23	BREAST	4240	NM_000546	exon6	c.T584C	p.I195T	Female	58
24	COLON	4241	NM_000546	exon7	c.C722T	p.S241F	Female	68
25	GASTRIC	4242	NM_000546	exon6	c.A578G	p.H193R	Male	56
26	COLON	4245	NM_000546	exon7	c.G743A	p.R248Q	Female	61
27	COLORECTAL	4252	NM_000546	exon5	c.G524A	p.R175H	Male	55
28	COLORECTAL	4257	NM_000546	exon7	c.C742T	p.R248W	Male	64
29	COLON	4259, 4276	NM_000546	exon6	c.A659G	p.Y220C	Female	44
30	COLON	4262, 4280	NM_000546	exon8	c.G848C	p.R283P	Female	65
31	ESOPHAGEAL	4264	NM_000546	exon8	c.G853A	p.E285K	Male	68
32	PANCREATIC	4265	NM_000546	exon8	c.T789A	p.N263K	Female	68
33	COLON	4266	NM_000546	exon7	c.C742T	p.R248W	Female	41
34	COLON	4268	NM_000546	exon7	c.G743A	p.R248Q	Female	69
35	PANCREATIC	4270	NM_000546	exon8	c.C844T	p.R282W	Female	66
36	COLON	4271, 4375, 4379	NM_000546	exon5	c.G404T	p.C135F	Male	36
37	RECTAL	4273	NM_000546	exon7	c.C742T	p.R248W	Male	50
38	RECTAL	4274	NM_000546	exon5	c.G524A	p.R175H	Female	55
39	COLON	4283	NM_000546	exon5	c.G524A	p.R175H	Female	54
40	RECTAL	4285	NM_000546	exon5	c.G524A	p.R175H	Male	46
41	COLON	4287	NM_000546	exon7	c.C742T	p.R248W	Female	43
42	COLON	4293, 4411	NM_000546	exon7	c.A707C	p.Y236S	Female	52
43	COLON	4304	NM_000546	exon7	c.G711A	p.M237I	Female	59
44	COLORECTAL	4306	NM_000546	exon5	c.G422A	p.C141Y	Female	41
45	BREAST	4307	NM_000546	exon7	c.T710A	p.M237K	Female	38
46	COLON	4316	NM_000546	exon5	c.G404A	p.C135Y	Female	50
47	RECTAL	4317	NM_000546	exon8	c.G818A	p.R273H	Female	42
48	COLON	4320	NM_000546	exon7	c.G713A	p.C238Y	Female	52
49	BREAST	4322	NM_000546	exon7	c.G743A	p.R248Q	Female	49
50	RECTAL	4323	NM_000546	exon5	c.G524A	p.R175H	Male	29
51	COLON	4324, 4376	NM_000546	exon6	c.C632T	p.T211I	Female	36
52	COLON	4327	NM_000546	exon8	c.T821C	p.V274A	Male	55
53	BREAST	4328	NM_000546	exon5	c.C405G	p.C135W	Female	67
54	BREAST	4334	NM_000546	exon8	c.C817T	p.R273C	Female	36
55	COLON	4335	NM_000546	exon5	c.G481A	p.A161T	Male	67
56	BREAST	4339	NM_000546	exon10	c.C1009T	p.R337C	Female	43
57	BREAST	4340	NM_000546	exon8	c.G797A	p.G266E	Female	67
58	BREAST	4343, 4402	NM_000546	exon6	c.A659G	p.Y220C	Female	50
59	COLORECTAL	4346	NM_000546	exon5	c.G524A	p.R175H	Male	49
60	ESOPHAGEAL	4348	NM_000546	exon6	c.G638A	p.R213Q	Male	24
61	BREAST	4349	NM_000546	exon5	c.G524A	p.R175H	Female	47
62	COLON	4350	NM_000546	exon4	c.T332G	p.L111R	Female	61
63	BREAST	4352	NM_000546	exon7	c.G743A	p.R248Q	Female	45
64	BREAST	4356	NM_000546	exon9	c.G993C	p.Q331H	Female	45
65	PROSTATE	4357	NM_000546	exon5	c.G524A	p.R175H	Male	61
66	COLON	4359	NM_000546	exon5	c.G527T	p.C176F	Male	34
67	COLORECTAL	4360	NM_000546	exon8	c.C817T	p.R273C	Female	52
68	BREAST	4362, 4363	NM_000546	exon7	c.G733A	p.G245S	Female	47
69	RECTAL	4373	NM_000546	exon7	c.G713A	p.C238Y	Male	47
70	BREAST	4381	NM_000546	exon7	c.G743A	p.R248Q	Female	39
71	RECTAL	4383	NM_000546	exon6	c.T590G	p.V197G	Male	57
72	BREAST	4386	NM_000546	exon8	c.C817T	p.R273C	Female	55
73	BREAST	4389	NM_000546	exon4	c.G329C	p.R110P	Female	46
74	BREAST	4390	NM_000546	exon7	c.G711A	p.M237I	Female	39
75	COLON	4391	NM_000546	exon6	c.T584A	p.I195N	Female	53
76	RECTAL	4399	NM_000546	exon6	c.G638A	p.R213Q	Female	51
77	AMPULLARY	4404	NM_000546	exon8	c.C844T	p.R282W	Female	64
78	RECTAL	4414	NM_000546	exon6	c.T658G	p.Y220D	Male	69

## Sheet: Supplementary Table 2
Supplementary Table 2. TCR library targeting mutant p53 neoantigens
Patient	TCR name	p53 mutation	HLA	CDR3A	CDR3B	Method of identification	Alpha	Beta
4114	4114-F6-Vb7.1	C135R	DRB1*11:01	CAASGGTYKYIF	CASSQEHSVGTGHNWAKNIQYF	TIL screening	MASIRAVFIFLWLQLDLVNGENVEQHPSTLSVQEGDSAVIKCTYSDSASNYFPWYKQELGKGPQLIIDIRSNVGEKKDQRIAVTLNKTAKHFSLHITETQPEDSAVYFCAASGGTYKYIFGTGTRLKVLA	MGCRLLCCAVLCLLGAVPIDTEVTQTPKHLVMGMTNKKSLKCEQHMGHRAMYWYKQKAKKPPELMFVYSYEKLSINESVPSRFSPECPNSSLLNLHLHALQPEDSALYLCASSQEHSVGTGHNWAKNIQYFGAGTRLSVL
4127	4127-TCR1	G245S	DRB3*02:02	CAVKGDYKLSF	CASSLVNTEAFF	TIL screening	MLLLLIPVLGMIFALRDARAQSVSQHNHHVILSEAASLELGCNYSYGGTVNLFWYVQYPGQHLQLLLKYFSGDPLVKGIKGFEAEFIKSKFSFNLRKPSVQWSDTAEYFCAVKGDYKLSFGAGTTVTVRA	MATRLLCWAALCLLGAELTEAGVAQSPRYKIIEKRQSVAFWCNPISGHATLYWYQQILGQGPKLLIQFQNNGVVDDSQLPKDRFSAERLKGVDSTLKIQPAKLEDSAVYLCASSLVNTEAFFGQGTRLTVV
4141	4141-TCR	R175H	A*02:01	CAASKSAIMVVLQTSSSL	CASSIQQGADTQYF	TIL screening	MHKSLRVLLVILWLQLSWVWSQQKEVEQDPGPLSVPEGAIVSLNCTYSNSAFQYFMWYRQYSRKGPELLMYTYSSGNKEDGRFTAQVDKSSKYISLFIRDSQPSDSATYLCAMSGLKEDSSYKLIFGSGTRLLVRP	MAPQLLGYVVLCLLGAGPLEAQVTQNPRYLITVTGKKLTVTCSQNMNHEYMSWYRQDPGLGLRQIYYSMNVEVTDKGDVPEGYKVSRKEKRNFPLILESPSPNQTSLYFCASSIQQGADTQYFGPGTRLTVL
4149	4149-TCRa2b2	Y220C	DRB3*02:02	CAVRVWDYKLSF	CASSISAGGDGYTF	TIL screening	MASAPISMLAMLFTLSGLRAQSVAQPEDQVNVAEGNPLTVKCTYSVSGNPYLFWYVQYPNRGLQFLLKYITGDNLVKGSYGFEAEFNKSQTSFHLKKPSALVSDSALYFCAVRVWDYKLSFGAGTTVTVRA	MHNQVLCCVVLCFLGANTVDGGITQSPKYLFRKEGQNVTLSCEQNLNHDAMYWYRQDPGQGLRLIYYSQIVNDFQKGDIAEGYSVSREKKESFPLTVTSAQKNPTAFYLCASSISAGGDGYTFGSGTRLTVV
4196	4196-AV12/BV6	R175H	A*02:01	CVVQPGGYQKVTF	CASSEGLWQVGDEQYF	TIL screening	MISLRVLLVILWLQLSWVWSQRKEVEQDPGPFNVPEGATVAFNCTYSNSASQSFFWYRQDCRKEPKLLMSVYSSGNEDGRFTAQLNRASQYISLLIRDSKLSDSATYLCVVQPGGYQKVTFGTGTKLQVIPDIQNPEPAVYQLKDPRSQDSTLCLFTDFDSQINVPKTMESGTFITDKCVLDMKAMDSKSNGAIAWSNQTSFTCQDIFKETNATYPSSDVPCDATLTEKSFETDMNLNFQNLLVIVLRILLLKVAGFNLLMTLRLWSS	MAIGLLCCVAFSLLWASPVNAGVTQTPKFQVLKTGQSMTLQCAQDMNHNSMYWYRQDPGMGLRLIYYSASEGTTDKGEVPNGYNVSRLNKREFSLRLESAAPSQTSVYFCASSEGLWQVGDEQYFGPGTRLTVTEDLRN
4196	4196-AV38/BV10	R175H	A*02:01	CAFMGYSGAGSYQLTF	CAISELVTGDSPLHF	TIL screening	MTRVSLLWAVVVSTCLESGMAQTVTQSQPEMSVQEAETVTLSCTYDTSENNYYLFWYKQPPSRQMILVIRQEAYKQQNATENRFSVNFQKAAKSFSLKISDSQLGDTAMYFCAFMGYSGAGSYQLTFGKGTKLSVIPDIQNPEPAVYQLKDPRSQDSTLCLFTDFDSQINVPKTMESGTFITDKCVLDMKAMDSKSNGAIAWSNQTSFTCQDIFKETNATYPSSDVPCDATLTEKSFETDMNLNFQNLLVIVLRILLLKVAGFNLLMTLRLWSS	MATRLFFYVALCLLWTGHMDAGITQSPRHKVTETGTPVTLRCHQTENHRYMYWYRQDPGHGLRLIHYSYGVKDTDKGEVSDGYSVSRSKTEDFLLTLESATSSQTSVYFCAISELVTGDSPLHFGNGTRLTVTEDLRN
4196	4196-AV6/BV11	R175H	A*02:01	CALDIYPHDMRF	CASSLDPGDTGELFF	TIL screening	MESFLGGVLLILWLQVDWVKSQKIEQNSEALNIQEGKTATLTCNYTNYSPAYLQWYRQDPGRGPVFLLLIRENEKEKRKERLKVTFDTTLKQSLFHITASQPADSATYLCALDIYPHDMRFGAGTRLTVKPDIQNPEPAVYQLKDPRSQDSTLCLFTDFDSQINVPKTMESGTFITDKCVLDMKAMDSKSNGAIAWSNQTSFTCQDIFKETNATYPSSDVPCDATLTEKSFETDMNLNFQNLLVIVLRILLLKVAGFNLLMTLRLWSS—	MATRLLCWAALCLLGAELTEAGVAQSPRYKIIEKRQSVAFWCNPISGHATLYWYQQILGQGPKLLIQFQNNGVVDDSQLPKDRFSAERLKGVDSTLKIQPAKLEDSAVYLCASSLDPGDTGELFFGEGSRLTVLEDLRN
4259	4259-F6-TCR	Y220C	DRB1*04:01	CAWNSGGSNYKLTF	CASSYSQAWGQPQHF	TIL screening	MASLRVLLVILWLQLSWVWSQQKEVEQNSGPLSVPEGAIASLNCTYSDRGSQSFFWYRQYSGKSPELIMFIYSNGDKEDGRFTAQLNKASQYVSLLIRDSQPSDSATYLCAWNSGGSNYKLTFGKGTLLTVNP	MHLGLLCCGAFSLLWAGPVNAGVTQTPKFRVLKTGQSMTLLCAQDMNHEYMYWYRQDPGMGLRLIHYSVGEGTTAKGEVPDGYNVSRLKKQNFLLGLESAAPSQTSVYFCASSYSQAWGQPQHFGDGTRLSIL
4259	4259-F1-TCR	Y220C	A*02:01	CAVRDGSATSGTYKYIF	CASSPGLAYEQYF	TIL screening	MHSAPISMLAMLFTLSGLRAQSVAQPEDQVNVAEGNPLTVKCTYSVSGNPYLFWYVQYPNRGLQFLLKYITGDNLVKGSYGFEAEFNKSQTSFHLKKPSALVSDSALYFCAVRDGSATSGTYKYIFGTGTRLKVLANIQNPEPAV	MATSLLCWMALCLLGADHADTGVSQDPRHKITKRGQNVTFRCDPISEHNRLYWYRQTLGQGPEFLTYFQNEAQLEKSRLLSDRFSAERPKGSFSTLEIQRTEQGDSAMYLCASSPGLAYEQYFGPGTRLTVTEDLRN
4266	4266-TCR2	R248W	A*68:01	CAVYTGGFKTIF	CASNLGGGSTDTQYF	TIL screening	MAGVFLLYVSMKMGGTTGQNIDQPTEMTATEGAIVQINCTYQTSGFNGLFWYQQHAGEAPTFLSYNVLDGLEEKGRFSSFLSRSKGYSYLLLKELQMKDSASYLCAVYTGGFKTIFGAGTRLFVKA	MHTRLLCWAALCLLGAELTEAGVAQSPRYKIIEKRQSVAFWCNPISGHATLYWYQQILGQGPKLLIQFQNNGVVDDSQLPKDRFSAERLKGVDSTLKIQPAKLEDSAVYLCASNLGGGSTDTQYFGPGTRLTVL
4266	4266-TCR3	R248W	A*68:01	CAFYYGGSQGNLIF	CASSFGSGSTDTQYF	TIL screening	MAGVFLLYVSMKMGGTTGQNIDQPTEMTATEGAIVQINCTYQTSGFNGLFWYQQHAGEAPTFLSYNVLDGLEEKGRFSSFLSRSKGYSYLLLKELQMKDSASYLCAFYYGGSQGNLIFGKGTKLSVKP	MHTRLLCWVVLGFLGTDHTGAGVSQSPRYKVAKRGQDVALRCDPISGHVSLFWYQQALGQGPEFLTYFQNEAQLDKSGLPSDRFFAERPEGSVSTLKIQRTQQEDSAVYLCASSFGSGSTDTQYFGPGTRLTVL
4266	4266-TCR4	R248W	A*68:01	CAVYPGGSQGNLIF	CASSLGTGSTDTQYF	TIL screening	MAGVFLLYVSMKMGGTTGQNIDQPTEMTATEGAIVQINCTYQTSGFNGLFWYQQHAGEAPTFLSYNVLDGLEEKGRFSSFLSRSKGYSYLLLKELQMKDSASYLCAVYPGGSQGNLIFGKGTKLSVKP	MHTRLLCWAALCLLGAELTEAGVAQSPRYKIIEKRQSVAFWCNPISGHATLYWYQQILGQGPKLLIQFQNNGVVDDSQLPKDRFSAERLKGVDSTLKIQPAKLEDSAVYLCASSLGTGSTDTQYFGPGTRLTVL
4273	4273-TCR1a2	R248W	DPB1*02:01	CAVTLSGGYNKLIF	CASSSRDYEQYF	TIL screening	MASLRVLLVILWLQLSWVWSQQKEVEQNSGPLSVPEGAIASLNCTYSDRGSQSFFWYRQYSGKSPELIMFIYSNGDKEDGRFTAQLNKASQYVSLLIRDSQPSDSATYLCAVTLSGGYNKLIFGAGTRLAVHP	MHNQVLCCVVLCFLGANTVDGGITQSPKYLFRKEGQNVTLSCEQNLNHDAMYWYRQDPGQGLRLIYYSQIVNDFQKGDIVEGYSVSREKKESFPLTVTSAQKNPTAFYLCASSSRDYEQYFGPGTRLTVT
4285	4285-TCR1	R175H	DRB1*13:01	CALITGGGNKLTF	CASRLQGWNSPLHF	TIL screening	MAKNPLAAPLLILWFHLDCVSSILNVEQSPQSLHVQEGDSTNFTCSFPSSNFYALHWYRWETAKSPEALFVMTLNGDEKKKGRISATLNTKEGYSYLYIKGSQPEDSATYLCALITGGGNKLTFGTGTQLKVEL	MHLGLLCCGAFSLLWAGPVNAGVTQTPKFRVLKTGQSMTLLCAQDMNHEYMYWYRQDPGMGLRLIHYSVGEGTTAKGEVPDGYNVSRLKKQNFLLGLESAAPSQTSVYFCASRLQGWNSPLHFGNGTRLTVT
4285	4285-IVS-TCR1	R175H	DRB1*13:01	CILRDNNARLMF	CASGLVGFNQPQHF	PBL IVS	MHLVTSITVLLSLGIMGDAKTTQPNSMESNEEEPVHLPCNHSTISGTDYIHWYRQLPSQGPEYVIHGLTSNVNNRMASLAIAEDRKSSTLILHRATLRDAAVYYCILRDNNARLMFGDGTQLVVKP	MAPQLLGYVVLCLLGAGPLEAQVTQNPRYLITVTGKKLTVTCSQNMNHEYMSWYRQDPGLGLRQIYYSMNVEVTDKGDVPEGYKVSRKEKRNFPLILESPSPNQTSLYFCASGLVGFNQPQHFGDGTRLSIL
4285	4285-IVS-TCR2	R175H	DRB1*13:01	CIVRARANAGGTSYGKLTF	CASLQFNEQFF	PBL IVS	MHLVARVTVFLTFGTIIDAKTTQPPSMDCAEGRAANLPCNHSTISGNEYVYWYRQIHSQGPQYIIHGLKNNETNEMASLIITEDRKSSTLILPHATLRDTAVYYCIVRARANAGGTSYGKLTFGQGTILTVHP	MAMSNQVLCCVVLCFLGANTVDGGITQSPKYLFRKEGQNVTLSCEQNLNHDAMYWYRQDPGQGLRLIYYSQIVNDFQKGDIAEGYSVSREKKESFPLTVTSAQKNPTAFYLCASLQFNEQFFGPGTRLTVL
4285	4285-IVS-TCR3	R175H	DRB1*13:01	CAVEDRRRTALIF	CASSEYQSQSNEQFF	PBL IVS	MHLQSTLGAVWLGLLLNSLWKVAESKDQVFQPSTVASSEGAVVEIFCNHSVSNAYNFFWYLHFPGCAPRLLVKGSKPSQQGRYNMTYERFSSSLLILQVREADAAVYYCAVEDRRRTALIFGKGTTLSVSS	MATWLVCWAIFSLLKAGLTEPEVTQTPSHQVTQMGQEVILRCVPISNHLYFYWYRQILGQKVEFLVSFYNNEISEKSEIFDDQFSVERPDGSNFTLKIRSTKLEDSAMYFCASSEYQSQSNEQFFGPGTRLTVL
4285	4285-IVS-TCR5	R175H	DRB1*13:01	CIVRGSPGAGGTSYGKLTF	CASSIRTEAFF	PBL IVS	MHLVARVTVFLTFGTIIDAKTTQPPSMDCAEGRAANLPCNHSTISGNEYVYWYRQIHSQGPQYIIHGLKNNETNEMASLIITEDRKSSTLILPHATLRDTAVYYCIVRGSPGAGGTSYGKLTFGQGTILTVHP	MANQVLCCVVLCFLGANTVDGGITQSPKYLFRKEGQNVTLSCEQNLNHDAMYWYRQDPGQGLRLIYYSQIVNDFQKGDIAEGYSVSREKKESFPLTVTSAQKNPTAFYLCASSIRTEAFFGQGTRLTVV
4285	4285-IVS-TCR6	R175H	DRB1*13:01	CAGPGGAGSYQLTF	CASSPFVVIGQINEQYF	PBL IVS	MHLITSMLVLWMQLSQVNGQQVMQIPQYQHVQEGEDFTTYCNSSTTLSNIQWYKQRPGGHPVFLIQLVKSGEVKKQKRLTFQFGEAKKNSSLHITATQTTDVGTYFCAGPGGAGSYQLTFGKGTKLSVIP	MAPQLLGYVVLCLLGAGPLEAQVTQNPRYLITVTGKKLTVTCSQNMNHEYMSWYRQDPGLGLRQIYYSMNVEVTDKGDVPEGYKVSRKEKRNFPLILESPSPNQTSLYFCASSPFVVIGQINEQYFGPGTRLTVT
4285	4285-IVS-TCR7	R175H	DRB1*13:01	CAVAHMDSNYQLIW	CASSYAGLAAPREQFF	PBL IVS	MHKLLAMILWLQLDRLSGELKVEQNPLFLSMQEGKNYTIYCNYSTTSDRLYWYRQDPGKSLESLFVLLSNGAVKQEGRLMASLDTKARLSTLHITAAVHDLSATYFCAVAHMDSNYQLIWGAGTKLIIKP	MALGLLCCGAFSLLWAGPVNAGVTQTPKFRVLKTGQSMTLLCAQDMNHEYMYWYRQDPGMGLRLIHYSVGEGTTAKGEVPDGYNVSRLKKQNFLLGLESAAPSQTSVYFCASSYAGLAAPREQFFGPGTRLTVL
4285	4285-IVS-TCR9	R175H	DRB1*13:01	CIVRARANAGGTSYGKLTF	CATRTGNEAFF	PBL IVS	MHLVARVTVFLTFGTIIDAKTTQPPSMDCAEGRAANLPCNHSTISGNEYVYWYRQIHSQGPQYIIHGLKNNETNEMASLIITEDRKSSTLILPHATLRDTAVYYCIVRARANAGGTSYGKLTFGQGTILTVHP	MANQVLCCVVLCFLGANTVDGGITQSPKYLFRKEGQNVTLSCEQNLNHDAMYWYRQDPGQGLRLIYYSQIVNDFQKGDIAEGYSVSREKKESFPLTVTSAQKNPTAFYLCATRTGNEAFFGQGTRLTVV
4293	TCR1	Y236S	DRB3*02:01	CAIGEGNTPLVF	CASSTRQGSGGELFF	TIL screening	MMKSLRVLLVILWLQLSWVWSQQKEVEQDPGPLSVPEGAIVSLNCTYSNSAFQYFMWYRQYSRKGPELLMYTYSSGNKEDGRFTAQVDKSSKYISLFIRDSQPSDSATYLCAIGEGNTPLVFGKGTRLSVIA	MASRLLCWVLLCLLGAGPVKAGVTQTPRYLIKTRGQQVTLSCSPISGHRSVSWYQQTPGQGLQFLFEYFSETQRNKGNFPGRFSGRQFSNSRSEMNVSTLELGDSALYLCASSTRQGSGGELFFGEGSRLTVL
4304	BV7-2 + AV8-1 PP4 CD4	M237I	DRB1*01:01	CAVTFMDTGRRALTF	CASSPRGGDYEQYF	TIL screening	MLLLLIPVLGMIFALRDARAQSVSQHNHHVILSEAASLELGCNYSYGGTVNLFWYVQYPGQHLQLLLKYFSGDPLVKGIKGFEAEFIKSKFSFNLRKPSVQWSDTAEYFCAVTFMDTGRRALTFGSGTRLQVQP	MATRLLFWVAFCLLGADHTGAGVSQSPSNKVTEKGKDVELRCDPISGHTALYWYRQSLGQGLEFLIYFQGNSAPDKSGLPSDRFSAERTGGSVSTLTIQRTQQEDSAVYLCASSPRGGDYEQYFGPGTRLTVT
4304	BV29-1 + AV12-2 PP4 CD4	M237I	DRB1*01:01	CAVRGGNTGFQKLVF	CSVRSEDTQYF	TIL screening	MKSLRVLLVILWLQLSWVWSQQKEVEQNSGPLSVPEGAIASLNCTYSDRGSQSFFWYRQYSGKSPELIMFIYSNGDKEDGRFTAQLNKASQYVSLLIRDSQPSDSATYLCAVRGGNTGFQKLVFGTGTRLLVSP	MASLLLLLLGLGSVFSAVISQKPSRDICQRGTSLTIQCQVDSQVTMMFWYRQQPGQSLTLIATANQGSEATYESGFVIDKFPISRPNLTFSTLTVSNMSPEDSSIYLCSVRSEDTQYFGPGTRLTVL
4304	BV11-2+ AV2	M237I	DRB1*01:01	CAVSGYQLIWGAGTKL	CASSLDRRGGRETQYF	TIL screening	MHLQSTLGAVWLGLLLNSLWKVAESKDQVFQPSTVASSEGAVVEIFCNHSVSNAYNFFWYLHFPGCAPRLLVKGSKPSQQGRYNMTYERFSSSLLILQVREADAAVYYCAVSGYQLIWGAGTKLIIKPNIQNPEPAV	MATRLLCWAALCLLGAELTEAGVAQSPRYKIIEKRQSVAFWCNPISGHATLYWYQQILGQGPKLLIQFQNNGVVDDSQLPKDRFSAERLKGVDSTLKIQPAKLEDSAVYLCASSLDRRGGRETQYFGPGTRLLVLEDLRN
4316	TCR B	C135Y	A*29:02	CAPSGGNQFYF	CASSPDRWDTEAFF	TIL screening	MHKNPLAAPLLILWFHLDCVSSILNVEQSPQSLHVQEGDSTNFTCSFPSSNFYALHWYRWETAKSPEALFVMTLNGDEKKKGRISATLNTKEGYSYLYIKGSQPEDSATYLCAPSGGNQFYFGTGTSLTVIPNIQNPEPAV	MATRVLCCAVICLLGAGLSNAGVMQNPRHLVRRRGQEARLRCSPMKGHSHVYWYRQLPEEGLKFMVYLQKENIIDESGMPKERFSAEFPKEGPSILRIQQVVRGDSAAYFCASSPDRWDTEAFFGQGTRLTVVEDLRN
4316	TCR D	C135Y	DRB1*07:01	CAESYSGGYQKVTF	CASSSFSNEQFF	TIL screening	MHLITSMLVLWMQLSQVNGQQVMQIPQYQHVQEGEDFTTYCNSSTTLSNIQWYKQRPGGHPVFLIQLVKSGEVKKQKRLTFQFGEAKKNSSLHITATQTTDVGTYFCAESYSGGYQKVTFGIGTKLQVIPNIQNPEPAV	MATWLVCWAIFSLLKAGLTEPEVTQTPSHQVTQMGQEVILRCVPISNHLYFYWYRQILGQKVEFLVSFYNNEISEKSEIFDDQFSVERPDGSNFTLKIRSTKLEDSAMYFCASSSFSNEQFFGPGTRLTVLEDLRN
4324	TCR1	T211I	C*06:02	CAASSTGGFKTIF	CASSLAGPETQYF	TIL screening	MTSIRAVFIFLWLQLDLVNGENVEQHPSTLSVQEGDSAVIKCTYSDSASNYFPWYKQELGKGPQLIIDIRSNVGEKKDQRIAVTLNKTAKHFSLHITETQPEDSAVYFCAASSTGGFKTIFGAGTRLFVKA	MASWTLCCVSLCILVAKHTDAGVIQSPRHEVTEMGQEVTLRCKPISGHDYLFWYRQTMMRGLELLIYFNNNVPIDDSGMPEDRFSAKMPNASFSTLKIQPSEPRDSAVYFCASSLAGPETQYFGPGTRLLVL
4324	TCR2	T211I	C*06:02	CAADTGGFKTIFGAGTRLF	CASSHAGENNEQYF	TIL screening	MTSIRAVFIFLWLQLDLVNGENVEQHPSTLSVQEGDSAVIKCTYSDSASNYFPWYKQELGKGPQLIIDIRSNVGEKKDQRIAVTLNKTAKHFSLHITETQPEDSAVYFCAADTGGFKTIFGAGTRLFVKANIQNPEPAV	MASWTLCCVSLCILVAKHTDAGVIQSPRHEVTEMGQEVTLRCKPISGHDYLFWYRQTMMRGLELLIYFNNNVPIDDSGMPEDRFSAKMPNASFSTLKIQPSEPRDSAVYFCASSHAGENNEQYFGPGTRLTVTEDLRN
4324	TCR3	T211I	C*06:02	CVVTHSGAGSYQLTF	CASRAQGDGYTF	TIL screening	MLLLLVPVLEVIFTLGGTRAQSVTQLDSHVSVSEGTPVLLRCNYSSSYSPSLFWYVQHPNKGLQLLLKYTSAATLVKGINGFEAEFKKSETSFHLTKPSAHMSDAAEYFCVVTHSGAGSYQLTFGKGTKLSVIPNIQNPEPAV	MAIGLLCCAALSLLWAGPVNAGVTQTPKFQVLKTGQSMTLQCAQDMNHEYMSWYRQDPGMGLRLIHYSVGAGITDQGEVPNGYNVSRSTTEDFPLRLLSAAPSQTSVYFCASRAQGDGYTFGSGTRLTVVEDLRN
4343	4343-TCR-D*	Y220C	DRB3*02:02	CAGGSYGKLTF	CASSFISNQPQHF	TIL screening	MHKSLRVLLVILWLQLSWVWSQQKEVEQDPGPLSVPEGAIVSLNCTYSNSAFQYFMWYRQYSRKGPELLMYTYSSGNKEDGRFTAQVDKSSKYISLFIRDSQPSDSATYLCAGGSYGKLTFGQGTILTVHPNIQNPEPAV	MAPQLLGYVVLCLLGAGPLEAQVTQNPRYLITVTGKKLTVTCSQNMNHEYMSWYRQDPGLGLRQIYYSMNVEVTDKGDVPEGYKVSRKEKRNFPLILESPSPNQTSLYFCASSFISNQPQHFGDGTRLSILEDLRN
4350	TCR4	L111R	A*11:01	CAAQDDKIIF	CASSAGEGSQPQHF	TIL screening	MAFRLLCCVAFCLLGAGPVDSGVTQTPKHLITATGQRVTLRCSPRSGDLSVYWYQQSLDQGLQFLIQYYNGEERAKGNILERFSAQQFPDLHSELNLSSLELGDSALYFCASSAGEGSQPQHFGDGTRLSIL
4350	TCR6	L111R	DRB1 08:03	CIVRGTSSNTGKLIF	CASSSRDIYGEQYF	TIL screening	MASWTFCCVSLCILVAKHTDAGVIQSPRHEVTEMGQEVTLRCKPISGHNSLFWYRQTMMRGLELLIYFNNNVPIDDSGMPEDRFSAKMPNASFSTLKIQPSEPRDSAVYFCASSSRDIYGEQYFGPGTRLTVT
4356	TCR-J	Q331H	B*40:01	CLVGPPLPIKAAGNKLTF	CASSSGDTEAFF	TIL screening	MHQVARVIVFLTLSTLSLAKTTQPISMDSYEGQEVNITCSHNNIATNDYITWYQQFPSQGPRFIIQGYKTKVTNEVASLFIPADRKSSTLSLPRVSLSDTAVYYCLVGPPLPIKAAGNKLTFGGGTRVLVKPNIQNPEPAV	MATRLLFWVAFCLLGADHTGAGVSQSPSNKVTEKGKDVELRCDPISGHTALYWYRQSLGQGLEFLIYFQGNSAPDKSGLPSDRFSAERTGGSVSTLTIQRTQQEDSAVYLCASSSGDTEAFFGQGTRLTVVEDLRN
4386	TCR F	R273C	DPB1*04:02	CAEKSTGNQFYF	CASSRVEGSDTQYF	TIL screening	MHGIRALFMYLWLQLDWVSRGESVGLHLPTLSVQEGDNSIINCAYSNSASDYFIWYKQESGKGPQFIIDIRSNMDKRQGQRVTVLLNKTVKHLSLQIAATQPGDSAVYFCAEKSTGNQFYFGTGTSLTVIPNIQNPEPAV	MACRLLCCAVLCLLGAVPMETGVTQTPRHLVMGMTNKKSLKCEQHLGHNAMYWYKQSAKKPLELMFVYSLEERVENNSVPSRFSPECPNSSHLFLHLHTLQPEDSALYLCASSRVEGSDTQYFGPGTRLTVLEDLRN
4386	TCR G	R273C	DPB1*04:02	CAVRDPTVSGTYKYIF	CSAIRDRSGGETQYF	TIL screening	MHSAPISMLAMLFTLSGLRAQSVAQPEDQVNVAEGNPLTVKCTYSVSGNPYLFWYVQYPNRGLQFLLKYITGDNLVKGSYGFEAEFNKSQTSFHLKKPSALVSDSALYFCAVRDPTVSGTYKYIFGTGTRLKVLANIQNPEPAV	MALLLLLLGPGSGLGAVVSQHPSRVICKSGTSVKIECRSLDFQATTMFWYRQFPKQSLMLMATSNEGSKATYEQGVEKDKFLINHASLTLSTLTVTSAHPEDSSFYICSAIRDRSGGETQYFGPGTRLLVLEDLRN
4386	TCR O	R273C	DPB1*04:02	CAEKRRGGSEKLVF	CASSPGGSQETQYF	TIL screening	MHGIRALFMYLWLQLDWVSRGESVGLHLPTLSVQEGDNSIINCAYSNSASDYFIWYKQESGKGPQFIIDIRSNMDKRQGQRVTVLLNKTVKHLSLQIAATQPGDSAVYFCAEKRRGGSEKLVFGKGTKLTVNPNIQNPEPAV	MATRLLCWAALCLLGADHTGAGVSQTPSNKVTEKGKYVELRCDPISGHTALYWYRQSLGQGPEFLIYFQGTGAADDSGLPNDRFFAVRPEGSVSTLKIQRTERGDSAVYLCASSPGGSQETQYFGPGTRLLVLEDLRN
4414	TCR A	Y220D	A*02:01	CAEISTSGTYKYIF	CASSLGGTGGIYNEQFF	TIL screening	MHTFAGFSFLFLWLQLDCMSRGEDVEQSLFLSVREGDSSVINCTYTDSSSTYLYWYKQEPGAGLQLLTYIFSNMDMKQDQRLTVLLNKKDKHLSLRIADTQTGDSAIYFCAEISTSGTYKYIFGTGTRLKVLANIQNPEPAV	MAPGLLCWVLLCLLGAGSVETGVTQSPTHLIKTRGQQVTLRCSSQSGHNTVSWYQQALGQGPQFIFQYYREEENGRGNFPPRFSGLQFPNYSSELNVNALELDDSALYLCASSLGGTGGIYNEQFFGPGTRLTVLEDLRN
4414	TCR D	Y220D	A*02:01	CAVSPRNNNARLMF	CASSPSGSDTQYF	TIL screening	MHTLLGLLILWLQLQWVSSKQEVTQIPAALSVPEGENLVLNCSFTDSAIYNLQWFRQDPGKGLTSLLLIQSSQREQTSGRLNASLDKSSGRSTLYIAASQPGDSATYLCAVSPRNNNARLMFGDGTQLVVKPNIQNPEPAV	MAFRLLCCVAFCLLGAGPVDSGVTQTPKHLITATGQRVTLRCSPRSGDLSVYWYQQSLDQGLQFLIQYYNGEERAKGNILERFSAQQFPDLHSELNLSSLELGDSALYFCASSVCASSPSGSDTQYFGPGTRLTVLEDLRN
*Due to the cysteine residues in the 25mer sequence, freshly reconstituted peptides or peptides with a cysteine to alpha-amino-butyric-acid substitution were used to test mutant specificity.

## Sheet: Supplementary Table 3
Supplementary Table S3. Prior lines of therapies patient 4349 had received
1	Docetaxel/Cytoxan/Herceptin
2	Tamoxifen
3	Docetaxel/Carboplatin/Pertuzumab/Herceptin
4	Navelbine/Herceptin/Pertuzumab
5	Kadcyla (Trastuzumab)
6	Herceptin/Xeloda
7	Lapatinib/Herceptin
8	Gemcitabine/Herceptin
9	Ibrance/Anastrazole/Herceptin
10	Ibrance/Faslodex/Herceptin

## Sheet: Supplementary Table 4
Supplementary Table 4. Correlation matrix between single cell transcriptome data in Fig. 4F and published single cell transcriptome datasets
	RX_Naive-like/transitional 1	RX_EM 1	RX_Naive-like/transitional 2	RX_MAIT-like	RX_EM 2	RX_Proliferating	PBL_Exh 1	PBL_EM	PBL_CM	PBL_Exh 2	PBL_Term Exh
RX_Naive-like/transitional 1	1	-0.547851	0.805565	0.191004	-0.551795	0.0882022	-0.587794	-0.112205	0.321086	-0.14226	-0.379896
RX_Naïve-like/transitional 2	0.805565	-0.546528	1	0.159344	-0.537508	0.0274123	-0.573706	-0.122594	0.256954	-0.175375	-0.355637
CD8.MAIT.Oh	0.434548	-0.0648532	0.354613	0.524014	-0.0982882	0.0126209	-0.102715	0.372611	0.469412	0.117233	-0.409059
8Mit.Wu	0.365041	0.00308773	0.288842	0.252514	0.0304691	0.44089	0.0120737	0.222563	0.265617	0.276042	-0.504303
PBL_CM	0.321086	-0.166604	0.256954	0.0290607	-0.184822	-0.0324927	0.131549	-0.0378342	1	0.196932	-0.252963
CD8.CM.OhB	0.307652	0.0510673	0.252019	0.177805	0.028875	0.0225609	0.0697532	0.10903	0.470653	0.287363	-0.411149
Mem_Eff_4_Feldman	0.281856	-0.0411444	0.224536	0.0233682	-0.0676034	-0.0253919	-0.00800556	-0.0326495	0.379139	0.140916	-0.209993
CD8_B_Feldman	0.247538	0.123288	0.193528	0.122225	0.168346	0.39306	0.111448	0.154188	0.15536	0.309079	-0.466638
CD8.CD39.Oh	0.232981	0.0888938	0.272936	0.0336582	0.134038	-0.0292258	0.0184068	0.0909599	0.0289514	0.162504	-0.196235
CD8_G_Feldman	0.210908	0.108068	0.167338	0.0660622	0.0683257	0.00383148	0.0796822	0.0412014	0.389175	0.23372	-0.292627
CD8.RPL.Oh	0.193892	-0.0560714	0.153802	0.924795	-0.0766347	-0.0340745	-0.114791	0.799027	0.102214	-0.122766	-0.182669
MAIT-like	0.191004	-0.0544987	0.159344	1	-0.0803794	-0.0416837	-0.171622	0.826113	0.0290607	-0.153386	-0.162055
Mem_Eff_6_Feldman	0.170881	0.152779	0.0750302	0.0512496	0.0732763	-0.034909	0.0298181	0.0149773	0.330053	0.225403	-0.261524
CD8.MITO.Oh	0.146936	-0.0192916	0.132407	0.253475	-0.0391799	-0.00937847	-0.145026	0.0315111	0.0143977	0.0961518	-0.126815
CD8.Term.Diff.Krishna	0.123	-0.0531573	0.0761311	-0.0223844	0.00684085	0.939749	-0.0551167	-0.0300042	0.00660408	0.0668341	-0.30089
Early.Act_5_Feldman	0.0916311	0.0718878	0.118731	0.0489653	0.0686594	-0.00458792	0.0836848	0.0356682	0.260776	0.169213	-0.206915
Exhaust_2_Feldman	0.0914649	-0.0717532	0.191777	0.00183816	-0.0616321	-0.0911054	-0.0970963	-0.0230852	0.00483157	-0.0726906	0.00949643
Proliferating	0.0882022	-0.0836818	0.0274123	-0.0416837	-0.0319536	1	-0.0775413	-0.0615706	-0.0324927	0.0171025	-0.251866
CD8.XCL.Oh	0.0876953	0.222885	0.0337524	0.136815	0.226931	0.0154613	0.174834	0.198817	0.284682	0.265279	-0.235412
CD8.Naive.OhB	0.0802172	0.392583	0.0454236	0.115417	0.392716	0.06407	0.351431	0.224233	0.328196	0.486945	-0.435992
CD8.PRO.Oh	0.064542	-0.0779918	0.00444636	-0.0500063	-0.0274309	0.963964	-0.068419	-0.0616529	-0.0419261	0.00959905	-0.23056
CD8.HSP.Oh	0.0617712	0.0452697	0.0847874	-0.0309988	0.0455595	-0.0204096	0.104441	-0.00623501	0.187589	0.11955	-0.0738779
B16_PROG.EX_Miller	0.045499	0.0776482	0.0130536	-0.0210943	0.0705658	-0.0629529	0.0384918	-0.0263822	0.193491	0.0923366	-0.0673516
Mel_Exhaust_TiroshD	0.0374112	0.412071	0.0544233	-0.0216954	0.432015	0.0396314	0.455782	0.14728	0.256521	0.613927	-0.413026
Exhaust_1_Feldman	0.0166563	-0.096604	-0.0412906	-0.0697705	-0.0492872	0.957487	-0.08997	-0.0848932	-0.0913703	-0.0477106	-0.159734
8KLRB1.WuA	-0.0294966	0.388833	-0.0859013	0.358543	0.338515	-0.0793187	0.215457	0.409651	0.227941	0.286007	-0.213333
LCMV_PROG.EX_Miller	-0.0709614	-0.00446145	-0.077289	-0.020184	0.0194515	-0.102421	-0.0976179	-0.0381835	-0.092267	-0.152696	0.163257
8Trm.1.WuA	-0.0873556	0.337364	-0.110207	-0.00726622	0.339767	-0.0227798	0.400554	0.159499	0.335065	0.390818	-0.1779
CD8.Stem.Like.KrishnaG	-0.10899	0.445643	-0.198235	0.0383375	0.374199	-0.0576435	0.120407	0.164983	0.385088	0.467546	-0.249245
PBL_EM	-0.112205	0.308265	-0.122594	0.826113	0.280605	-0.0615706	0.21641	1	-0.0378342	0.0968759	-0.104716
PBL_Eff 2	-0.14226	0.563244	-0.175375	-0.153386	0.558245	0.0171025	0.580051	0.0968759	0.196932	1	-0.321482
8chrom.WuA	-0.204303	0.439544	-0.20226	-0.0539142	0.462444	-0.0163119	0.498675	0.1748	0.181804	0.43509	-0.12872
CD8.DYS.LiF	-0.212556	0.401438	-0.156338	-0.0609934	0.382441	-0.0430747	0.335143	0.0980316	-0.0670873	0.276993	-0.0816923
Exhaust_3_FeldmanC	-0.292752	0.484818	-0.299974	-0.0899477	0.496651	-0.0666844	0.673941	0.154955	0.209006	0.492726	-0.129835
TOX_ScottH	-0.302205	0.129824	-0.331043	-0.164119	0.152985	0.545945	0.0946936	-0.061285	-0.263221	-0.028612	0.155871
8Trm.2.WuA	-0.34895	0.650744	-0.353013	-0.0218247	0.637469	-0.0491749	0.53965	0.356276	-0.134512	0.456222	-0.0344321
Term Exh	-0.379896	-0.0599101	-0.355637	-0.162055	-0.0649997	-0.251866	0.0265243	-0.104716	-0.252963	-0.321482	1
CD8.FGFBP2.OhB	-0.412129	0.741154	-0.443853	-0.0307048	0.724052	-0.029798	0.699021	0.34241	-0.00770207	0.662204	-0.110202
LCMV_TERMN.EX_Miller	-0.417984	0.249301	-0.410187	-0.157777	0.236065	-0.165276	0.2227	0.0141861	-0.247415	0.00958351	0.440484
8EFF.WuA	-0.424988	0.785622	-0.434361	-0.0813689	0.747941	-0.0821383	0.715516	0.340929	-0.0346514	0.659156	-0.100549
B16_TERMINAL.EX_MillerE	-0.487406	0.428728	-0.468299	-0.137893	0.423289	-0.0714081	0.437549	0.132022	-0.17626	0.185132	0.25799
8Trm.3.WuA	-0.49117	0.770716	-0.500957	-0.0270582	0.751187	-0.052307	0.690754	0.424974	-0.165599	0.554663	-0.00668527
RX_EM 1	-0.547851	1	-0.546528	-0.0544987	0.932088	-0.0836818	0.677827	0.308265	-0.166604	0.563244	-0.0599101
RX_EM 2	-0.551795	0.932088	-0.537508	-0.0803794	1	-0.0319536	0.703522	0.280605	-0.184822	0.558245	-0.0649997
PBL_Eff 1	-0.587794	0.677827	-0.573706	-0.171622	0.703522	-0.0775413	1	0.21641	0.131549	0.580051	0.0265243
8EM.WuA	-0.61581	0.827445	-0.604755	-0.140751	0.796279	-0.117736	0.689678	0.280887	-0.172441	0.5015	0.0791526
AWu et al. Nature 579, 274-278 (2020)
BOh et al.,Cell 181, 1612-1625 e1613 (2020)
CSade-Feldman et al., Cell 175, 998-1013 e1020 (2018)
DTiroshi et al., Science 352, 189-196 (2016)
EMiller et al, Nat Immunol 20, 326-336 (2019)
FLi et al, Cell 176, 775-789 e718 (2019)
GKrishna et al., Science 370, 1328-1334 (2020)
HScott et al., Nature 571, 270-274 (2019)
RX infusion product; Exh Exhausted T cells; CM central memory; EM effector memory; MAIT mucosal-associated invariant T cells

## Sheet: Supplementary Table 5
Supplementary Table 5. Publicly available gene signatures used in Supplementary Table S6.
TIROSH_MEL_CD8_TCELL_EXHAUST	Tirosh et al, 2016	Sig1	FCRL3	CD27	PRKCH	B2M	ITM2A	TIGIT	ID3	GBP2	PDCD1	KLRK1	HSPA1A	SRGN	TNFRSF9	TMBIM6	TNFRSF1B	CADM1	ACTB	CD8A	RGS2	FAIM3	EID1	HSPB1	RNF19A	IFI16	LYST	PRF1	STAT1	UBC	CD74	IL2RG	FYN	PTPN6	HLA-DRB1	HNRNPC	UBB	CD8B	HAVCR2	IRF8	LAG3	ATP5B	STAT3	IGFLR1	MGEA5	HSPA1B	COTL1	VCAM1	HLA-DMA
Sade_Feldman_TCELL_CD8_G	Sade-Feldman et al, 2019	Sig2	IL7R	GPR183	LMNA	NR4A3	TCF7	MGAT4A	CD55	AIM1	PER1	FOSL2	EGR1	TSPYL2	YPEL5	CSRNP1	REL	SKIL	PIK3R1	FOXP1	RGCC	PFKFB3	MYADM	ZFP36L2	USP36	TC2N	FAM177A1	BTG2	TSC22D2	FAM65B	STAT4	RGPD5	NEU1	IFRD1	PDE4B	NR4A1
Sade_Feldman_TCELL_CD8_B	Sade-Feldman et al, 2019	Sig3	CD38	CCL3	STMN1	MYO7A	GOLIM4	VCAM1	WARS	HAVCR2	LGALS9	ID3	PRDX3	MCM5	LSM2	MTHFD1	FASLG	SNAP47	IFI35	SKA2	NDUFB3	FABP5	IFI27L2	PTTG1	ENTPD1	EPSTI1	PDCD1	TRAFD1	SIRPG	RGS3	UBE2F	SNRPD1	FIBP	CLTA	CXCL13	NMI	DNPH1	PCNA	ACP5	MRPL28	FARSA	COX5A	MRPL51	SNRPE	RANBP1	NOP10	PYCARD	GTF3C6	CCR5
Sade_Feldman_TCELL_CD8_1_EXHAUST	Sade-Feldman et al, 2019	Sig4	SPC25	CDCA5	ESCO2	CDC45	ZWINT	SHCBP1	DLGAP5	RAD51	KIF18B	RRM2	BIRC5	TK1	HJURP	UBE2C	CCNB2	CENPW	GINS2	RAD51AP1	DTL	SPC24	CDCA3	PKMYT1	MELK	ANLN	CDCA8	KIAA0101	GGH	AURKB	ASF1B	CDC20	NCAPG	DHFR	KIFC1	TYMS	CKAP2L	CLSPN	MLF1IP	TROAP	KIF2C	WDR34	CDK1	KIF23	PLK1	TOP2A	NUF2	HMGB3	ASPM
Sade_Feldman_TCELL_CD8_2_EXHAUST	Sade-Feldman et al, 2019	Sig5	GEM	LAYN	VCAM1	RDH10	FAM3C	KIR2DL4	TNFRSF18	MTSS1	CADM1	ENTPD1	ETV1	AFAP1L2	TNFRSF9	NAB1	PELI1	DFNB31	CTLA4	HSPB1	FKBP4	NAMPTL	MYO7A	CXCL13	GOLIM4	PHLDA1	DNAJA4	TGIF1	HAVCR2	APLP2	GPR56	BPGM	SEC14L1	TNIP3	METRNL	HSPH1	KLRC2	PMAIP1	DUSP4	IGFLR1	HSPA1A	ZFAND2A	NDFIP2	PAM	TP53INP1	AHI1	UBE2F	HSPA4	ICOS
Sade_Feldman_TCELL_CD8_3_EXHAUST	Sade-Feldman et al, 2019	Sig6	CCL3	EPSTI1	CD38	FASLG	IFI44L	GIMAP6	TRAFD1	LGALS9	CXCR6	RAB37	CCR5	ZBP1	SAMD9L	SIRPG	MX1	HAVCR2	ACP5	DDX60	PDCD1	SH2D3C	GPR174	RPS6KA1	GBP5	GBP1	PTPN6	S100PBP	IFI35	OAS3	SNAP47	GIMAP4	PARP9	IFNG	SIT1	PYCARD	RGS3	XAF1	OAS2	C5orf56	GIMAP5	ABI3	SNX20	VAMP5	IRF2	UBASH3A	PARP10	GIMAP7	GBP4
Sade_Feldman_TCELL_CD8_4_MEMORY_EFF	Sade-Feldman et al, 2019	Sig7	LMNA	NR4A3	GPR183	CDKN1A	CCR7	S1PR1	KDM6B	ELL2	TIPARP	SC5D	PLK3	CD55	NR4A1	REL	PBX4	TNF	IL7R	RGCC	FOSL2	SIK1	CSRNP1	GPR132	GLUL	KIAA1683	RALGAPA1	PRNP	PRMT10	SORL1	FAM177A1	CHMP1B	ZC3H12A	TSC22D2	P2RY8	NEU1	TCF7	ZNF683	MYADM	ATP2B1	CREM	OAT	NFE2L2	DNAJB9	SKIL	DENND4A	SERTAD1	YPEL5	BCL6
Sade_Feldman_TCELL_CD8_5_EARLY_ACTIVATE	Sade-Feldman et al, 2019	Sig8	ELL2	PFKFB3	DTHD1	SMAP2	FKBP5	AIM1	TMEM39A	NR4A3	PER1	TSPYL2	TTN	TMEM2	IL6ST	NAB1	IQGAP2	SLC7A5	IPCEF1	DCTN6	DUSP4	RANBP2	FAM177A1	GABARAPL1	RGPD6	CTLA4	CREM	ETS1	PNRC1	ZFP36L2	RGPD5	ZNF331	CNOT6L	TGIF1	CXCL13	PDE4D	RNF19A
Sade_Feldman_TCELL_CD8_6_MEMORY_EFF	Sade-Feldman et al, 2019	Sig9	PLAC8	S1PR1	SORL1	SELL	TCF7	CCR7	IL7R	MGAT4A	FAM65B	LTB	FLT3LG	PXN	A2M	ATM	C20orf112	GPR183	EPB41	ADD3	GRAP2	KLRG1	GIMAP5	TC2N	TXNIP	GIMAP2	TNFAIP8	IL16
Wherry_TN_VS_TEFF_CD8_TCELL_UP	http://www.broadinstitute.org/gsea/msigdb/cards/Wherry_NAIVE_VS_EFF_CD8_TCELL_UP	Sig10	ADCY6	ARRB1	EYA2	CCND2	PLEKHA1	FAM134B	DUSP6	NOP56	EVL	EML5	C8orf42	NR4A3	NOLC1	ZNRF1	SIPA1L2	SFXN2	PRMT3	ST6GAL1	ZBTB20	RGS10	PRKD2	SMAD7	TCF7	SESN1	PKD1	RERE	CNN3	TNNT1	CTSS	RPS19	RPS6	GSN	SATB1	FAM101B	VKORC1	RALGPS2	SELL	DNAJC7	FAM102A	HMP19	PHTF2	NOTCH1	CCR7	MFN1	ZEB1	RAMP1	SMAD1
Wherry_TN_VS_TEFF_CD8_TCELL_DN	http://www.broadinstitute.org/gsea/msigdb/cards/Wherry_NAIVE_VS_EFF_CD8_TCELL_DN	Sig11	LGALS1	HOPX	S100A6	RORA	ACOT7	DAP	DENND5A	LXN	COX17	CCR2	GZMA	LGALS3	ID2	IFITM10	S100A10	MNS1	TSPAN31	PADI2	GZMB	ITGAX	LSM1	GZMK	MYO1F	KLRK1	ITGAM	CDC34	KLRC1	S100A13	ANXA1	S100A11	CCL5	CSDA	E2F8	PRF1	S100A4	SH2D2A	PSMB10	SGOL1	NDUFV3	IL18RAP	BCL2A1	IFNG	HLA-A	BHLHE40	MBD2	CTLA4	ANXA6
Wherry_TN_VS_TEX_CD8_TCELL_UP	http://www.broadinstitute.org/gsea/msigdb/cards/Wherry_NAIVE_VS_EXHAUSTED_CD8_TCELL_UP	Sig12	FAM102A	DNAJB1	KLK8	ANAPC5	DDX50	PIK3CD	GM2A	IMPDH2	HPCAL1	PLAC8	RUFY1	PRKCB	MBP	ITPA	GSN	SNRNP40	ENG	SATB1	ITGB7	NUDT16L1	TWF2	LYSMD1	SETD6	ELOVL5	LRWD1	ABLIM1	LMAN1	DNAJC7	PPDPF	HBS1L	ARMC1	EIF3B	KCNN4	ST6GAL1	C8orf42	AP3M1	GLO1	NR4A3	TMEM223	MTCH1	HEXA	PRMT3	ANAPC16	MLX	RPN1	EIF2S1	CNN3
Wherry_TN_VS_TEX_CD8_TCELL_DN	http://www.broadinstitute.org/gsea/msigdb/cards/Wherry_NAIVE_VS_EXHAUSTED_CD8_TCELL_DN	Sig13	GJA1	POLR2C	PARP1	LAMC1	C9orf3	BHLHE40	TNFRSF9	SHMT2	GZMB	HTR2C	KHK	CFH	COL19A1	SLC4A7	CLDN11	ENTPD7	SCN7A	AFP	HMGA2	CRISP2	LRP10	LCN2	MYCL1	TM4SF1	HMX3	EFNB3	FASLG	STRA6	F2R	PTPN12	SNRNP27	ACADVL	LITAF	IFNG	YAP1	GSG2	COCH	ZNF436	ZNF35	RGS16	TRPC1	DOCK7	TERF1	TGM2	PRDM1	ATP5J2	CD244
Wherry_TN_VS_TMEM_CD8_TCELL_UP	http://www.broadinstitute.org/gsea/msigdb/cards/Wherry_NAIVE_VS_MEMORY_CD8_TCELL_UP	Sig14	ADCY6	CNN3	NAB2	SMC4	IDH2	PRKCB	MFHAS1	MAP4K2	ST6GAL1	ITGAE	IGHM	RAMP1	RNASET2	RALGPS2	MYB	RAB3IP	SESN1	C8orf42	TMEM50B	FAM134B	ABLIM1	NCBP1	SLC30A4	TNNT1	KIF23	PPIC	EPHX1	SQLE	SPSB1	PBX2	IL6R	MAP7	ID3	LIPA	SFMBT2	CXXC5	CRAMP1L	PSMA5	RPS6KA2	ACTN1	TCP11	ATPIF1	USP34	IGF1R	GPD2	IFI27L2	TUBA1A
Wherry_TN_VS_TMEM_CD8_TCELL_DN	http://www.broadinstitute.org/gsea/msigdb/cards/Wherry_NAIVE_VS_MEMORY_CD8_TCELL_DN	Sig15	TSPAN31	CCR5	HOPX	IFNG	ANXA2	S100A6	ID2	SNTB2	IFITM10	FASLG	CCR2	CASP1	ITGAX	XDH	IL18RAP	LGALS1	FOSB	GZMB	F2R	ANXA1	KCNJ8	NRP1	KLRK1	ELL2	CCL5	GZMM	CXCR3	KLRG1	KLF6	PLSCR1	PRDX2	PRR13	MAPRE2	AHNAK	CRTAM	ADAM19	EOMES	COX17	EMP1	MCART6	MYO1F	FCGR2B	CTLA4	DOCK5	BHLHE40	UNC119	CCND3
Wherry_TEFF_VS_TEX_CD8_TCELL_UP	http://www.broadinstitute.org/gsea/msigdb/cards/Wherry_EFFECTOR_VS_EXHAUSTED_CD8_TCELL_UP	Sig16	HBXIP	MRPL34	SEMA4A	CDKN2D	SLC1A5	LYSMD1	ELAVL1	RSU1	SRP68	FAM117A	SRPK1	43714	MLX	TSPAN31	C9orf23	CDC37	GRAMD3	TIAM1	FAM89B	KIAA1274	ETS1	RNPS1	SSNA1	ANXA6	TWF2	BRAP	ICAM2	PSMD13	CCR2	EIF2B5	CCNDBP1	DAP	AP1M1	ITGAX	C2orf43	EIF3B	UBQLN1	KLRC1	PRPSAP1	IL18RAP	HSD11B1	KLRK1	DBI	PLAC8	LGALS9B	MKNK2	HCLS1
Wherry_TEFF_VS_TEX_CD8_TCELL_DN	http://www.broadinstitute.org/gsea/msigdb/cards/Wherry_EFFECTOR_VS_EXHAUSTED_CD8_TCELL_DN	Sig17	DUSP6	MAGEL2	F2RL1	AFP	MYO6	PTPN12	CRISP2	EFNB3	LCLAT1	CFH	ANXA3	EGR2	DDIT4	RGS16	TNFRSF9	DOCK7	PLEKHA1	ZFP28	GCM2	HAO2	CKMT2	NKIRAS1	GPLD1	MRPS2	IMMT	CD244	ZNF821	CLDN11	RIN2	RGS10	FAM207A	EPCAM	OVGP1	SCAND1	SCN7A	TLR7	C16orf72	NRK	GSTO1	COCH	NSDHL	MITF	CXCL13	PAWR	MTRF1L	SCAMP1	CD22
Wherry_TEFF_VS_TMEM_CD8_TCELL_UP	http://www.broadinstitute.org/gsea/msigdb/cards/Wherry_EFFECTOR_VS_MEMORY_CD8_TCELL_UP	Sig18	GZMA	ENTPD1	JAK1	PRIM2	NCBP1	S100A11	LGALS1	DAP	RNF14	ATPIF1	IL18RAP	GZMB	DENND5A	CTSA	LGALS3	FRG1	GALNT4	SEC14L1	CCNE1	LXN	LEPREL4	GZMK	KIF22	STAB1	CD68	GABARAPL1	NDUFV3	DHRS1	PSMD8	LSM1	MRPS17	ITGAX	HK2	ARL6IP4	S100A4	SRP14	CCR2	S100A10	REPS1	KLRC1	CSDA	AK3	CHD7	COX17	PSMA2	GBA	TMEM160
Wherry_TEFF_VS_TMEM_CD8_TCELL_DN	http://www.broadinstitute.org/gsea/msigdb/cards/Wherry_EFFECTOR_VS_MEMORY_CD8_TCELL_DN	Sig19	DUSP6	PABPC4	HSPE1	FOSB	HMP19	IL7R	P2RX4	C3AR1	EYA2	DUSP1	SESN1	FAM134B	APEX1	SLC11A2	VKORC1	FAM101B	DDX47	NOP56	TCF7	RERE	DYM	NPM1	EVL	RGS10	HDAC7	CD7	SMAD7	KLF4	PLEKHA1	CCR7	SMAD1	CRP	MYC	SELL	C8orf42	SSBP2	GSTO1	SLC44A1	FOS	TP53	KCNJ8	ENTPD5	CD72	JUND	WDR92	PARP8	POU6F1
Wherry_TEX_VS_TMEM_CD8_TCELL_UP	http://www.broadinstitute.org/gsea/msigdb/cards/Wherry_EXHAUSTED_VS_MEMORY_CD8_TCELL_UP	Sig20	SCN7A	LRP10	MYO6	DDIT4	KHK	C9orf3	CANX	CCDC93	WNK2	CFHR2	LAMC1	GAPDHS	LITAF	COCH	SFRP2	TWSG1	EGR2	RGS16	SLC4A8	SEC14L1	PERP	CD244	MC5R	AFP	LAT2	ZNF821	ACADVL	STRA6	CD22	ITGAV	PAWR	BLK	LCLAT1	NDUFS4	MYCL1	CSF1	CLIC4	SPOCK2	PRDM1	CEP250	LY86	EFNB3	EPCAM	FAM207A	HIF1A	YAP1	CCRL2
Wherry_TEX_VS_TMEM_CD8_TCELL_DN	http://www.broadinstitute.org/gsea/msigdb/cards/Wherry_EXHAUSTED_VS_MEMORY_CD8_TCELL_DN	Sig21	IL7R	GM2A	DYM	SETD4	ETS1	HMP19	KLK8	PLAC8	ITGB7	TWF2	ARMC1	KLRK1	TOB1	MBP	RREB1	IQGAP2	USP24	GLO1	NSMCE1	CUX1	ELAVL1	IL18RAP	ELOVL5	FOS	PIK3CD	FBL	ANXA1	MRPL50	GNPAT	ANXA5	GALNT10	HADHB	TLE4	AURKAIP1	CCT8	TM9SF2	TSPAN31	IL6R	PRPSAP1	FAM102A	ANAPC5	TMEM66	MIEN1	LYSMD1	EIF2S1	SMARCA2	RHOA
Wherry_GP33_VS_GP276_TEX_TCELL_UP	http://www.broadinstitute.org/gsea/msigdb/cards/Wherry_GP33_VS_GP276_LCMV_SPECIFIC_EXHAUSTED_CD8_TCELL_UP	Sig22	SHOX2	SMAD7	C6orf26	ITIH4	GMPPB	PXMP2	ERCC5	YAP1	ANXA3	DDRGK1	B3GALT4	CPLX2	FRK	ATG2A	SERPINH1	MLLT1	HAO2	CPS1	MAGEL2	CKMT1B	HMX3	ARID3B	SURF4	MRC1	STRA6	TNKS1BP1	FIGLA	SHMT2	ZDHHC9	MEOX1	NDUFA13	CCL11	ITIH1	STIM1	ARL8B	POLRMT	PLA2G4A	IGFBPL1	LRP10	ACE2	LY86	PAM	GABRB2	MITF	EFNB3	SFRP2	HLA-DMA
Wherry_GP33_VS_GP276_TEX_TCELL_DN	http://www.broadinstitute.org/gsea/msigdb/cards/Wherry_GP33_VS_GP276_LCMV_SPECIFIC_EXHAUSTED_CD8_TCELL_DN	Sig23	GHITM	TIPRL	C11orf31	TMEM50B	METTL9	PPP2R1B	SNX1	EDEM1	RBM18	SEH1L	PPM1G	IVNS1ABP	GALK2	CXorf38	SLC7A6	XRCC6	LATS2	ITGAL	DPP3	RNASEH1	ELAVL1	DERL2	C9orf16	PLEKHB2	FRMD6	KLF3	LY75	UTP14A	AP1M1	ARIH1	SLC1A5	SSNA1	KLRC1	SMARCB1	POLR2M	HSD11B1	CTNNB1	SACM1L	TMEM45A	WNT10A	ANXA5	TM9SF2	ABCE1	YIF1A	PPM1B	MSH2	DAP
GSE8678_IL7R_LOW_VS_HIGH_EFF_CD8_TCELL_UP	http://www.broadinstitute.org/gsea/msigdb/cards/GSE8678_IL7R_LOW_VS_HIGH_EFF_CD8_TCELL_UP	Sig24	DDA1	CAPN2	NFIC	CDYL	DHCR7	CEBPG	TAX1BP3	KCNJ8	C22orf36	C1orf27	NRARP	TRAIP	NEB	RDM1	TSPAN32	ATP2A3	RAP1GAP2	SPATA13	TAF6	ACPL2	CLCN5	PSMD9	MRPL38	NUDT17	L1CAM	CDK19	ITGB2	USP6NL	TUBB2B	FCGR2B	SLC48A1	SGK223	PYCARD	CCND3	IDH2	CLIC5	PPL	RASL11B	DGCR6	GALNTL1	OSBPL3	PRDM1	TRAPPC1	MEGF9	TMEM120A	PRF1	LPIN1
GSE8678_IL7R_LOW_VS_HIGH_EFF_CD8_TCELL_DN	http://www.broadinstitute.org/gsea/msigdb/cards/GSE8678_IL7R_LOW_VS_HIGH_EFF_CD8_TCELL_DN	Sig25	TSPAN13	TRIM5	C12orf35	SPINT2	PCGF6	CD9	PDE2A	SESN3	GLRX5	RWDD1	IL27RA	TRAF5	HLA-DOA	UTP11L	GRK6	NIT2	CRTAM	ACBD6	CCS	ZFYVE1	DUS2L	RPS18	CTSZ	CTSS	PDLIM1	GDPD5	FAM101B	IL16	C21orf59	RABGAP1L	FBXO21	LINC00116	DDB2	CYB5A	MRPS34	SIX1	SIPA1	WDR11	CREB3	VPS13A	POLR3E	FAM78A	KIAA1430	WDR85	IFNAR2	FAAH	RPL32
Kurtulus_CD62L+SlamF7-CX3CR1- TCELL_UP	Kurtulus et al 2019	Sig26	ZSCAN10	IFNGR2	ACTN1	ABCA1	GM14085	2610019F03RIK	IRS2	PPARGC1B	USP28	DUSP10	AUTS2	RAB4A	BAMBI-PS1	NSG2	NIPAL1	C1QB	H2-OB	INADL	BACH2	PID1	IL6RA	FAM101B	QRFP	POU2AF1	PDE2A	TLR13	5730508B09RIK	RAPGEF4	SPON1	ST6GAL1	VIPR1	PDK2	LEF1	S1PR1	SMAD1	TCF7	GM10825	GM11696	PRRG4	CLEC4N	EFHC1	GM11346	MYB	BEND4	CCR7	CD55	ADK
Kurtulus_CD62L+SlamF7-CX3CR1- TCELL_DN	Kurtulus et al 2019	Sig27	COX4I1	TPM3	H2-D1	SSB	MTPN	OSTC	CAPZA1	CARD11	ARPC4	AKR1A1	TMBIM6	CLIC1	ACLY	SARNP	SPCS2	CALM1	ERH	ATP6V0E	IL2RG	ERP44	R3HDM4	PSMA2	NDFIP1	MRPL4	SUMO2	CAPZB	PLD3	PSMB4	PSMB8	ATP5J	ARPC5	PSMA3	MINOS1	PPIA	SHFM1	UBE2N	CFL1	CALM3	WWP2	BNIP2	SEC11C	NDUFV2	ACTB	COPE	TMED2	ITPRIPL1	INPP5D
Kurtulus_CD62L-SlamF7hiCX3CR1- TCELL_UP	Kurtulus et al 2019	Sig28	HMGB1	COX4I1	RBM3	SSR1	H2-Q4	SLC25A5	IL2RG	NDFIP1	NDUFA13	TMSB10	FKBP8	PSMB8	TAGLN2	SPCS2	CUTA	PSMA1	CLDN25	CST7	LCP1	STT3A	EDEM2	PADI2	ARHGAP9	MRPS14	SUB1	PSME2	STYX	GRINA	COX5A	SP140	BTBD16	JAK3	UFC1	NEK7	TRAM1	ANAPC13	RPE	GPR171	CD52	PTPRCAP	LY6C2	NAA20	MCM3	PTPN6	PSMB9	GNG2	RFTN1
Kurtulus_CD62L-SlamF7hiCX3CR1- TCELL_DN	Kurtulus et al 2019	Sig29	PTK2	IFNGR2	PPARGC1B	PEG13	CYP2D22	RASGRP2	TGFBR3	CCL9	UBTD1	GM10825	ITGA6	IL13RA1	ACSS2	MNT	CNNM2	ARHGAP31	ICA1L	SIPA1L3	LMBR1L	LSM14B	RAB32	MTMR10	ZRSR1	FAM63A	PLK2	ARHGEF18	PRSS12	PIKFYVE	TRAPPC10	TAB3	S1PR1	ZFP746	LRP6	RRAGA	TPRGL	MED13L	FECH	IRF1	DBF4	ERCC5	HDAC5	KLF2	SGK1	KIF21B	A430078G23RIK	PRPSAP2	BSDC1
Kurtulus_CD62L-SlamF7hiCX3CR1+ TCELL_UP	Kurtulus et al 2019	Sig30	H3F3B	ITPRIP	ARHGDIA	CTSD	GNB1	TNFAIP3	APH1A	OSTF1	ITM2C	TSPO	NFATC3	MYL12A	CERS2	RAB14	VMP1	SLC20A1	LMBRD1	TCEB2	FYN	TPM4	GNPTG	ANKRD44	STRIP1	PIK3R1	RAB1	PJA1	ATP2B1	ACTG1	ADAR	PRKX	SH2D2A	MYL6	TAF12	CLTC	UBE2G2	PPP1CC	HIATL1	WDR92	PPP1R11	PARK7	CD97	SMAD3	LMF2	LRRC8D	PRKAA1	CYTH2	GOT1
Kurtulus_CD62L-SlamF7hiCX3CR1+ TCELL_DN	Kurtulus et al 2019	Sig31	CXCR5	KLRA6	GBP11	TNFSF8	KLRA7	KLRA1	RGS10	MYB	NSG2	IKZF2	SELL	KLRA13-PS	KLRA23	CCR7	TMEM108	2610019F03RIK	TREML2	DAPL1	MYC	ID3	KLRA5	AOAH	ADCK3	XCL1	GM19705	ST6GAL1	ATP1B1	SPINT2	ACPP	RPGRIP1	TCF7	SLC16A5	CABLES1	FOLR4	IRS2	QRFP	INADL	ACTN1	CLDN10	BMP7	2010300C02RIK	MAP7	KLRA19	H2-OA	SWAP70	ST8SIA1	RAMP1
LUCA_TCM_vs_TEM_CD8_TCELL_UP	Gattinoni et al 2011	Sig32	SELL	CDH1	TSHZ2	LOC283174	ACTN1	DSC1	SESN3	LEF1	SELP	IGSF9B	GCNT4	MAL	APP	FAAH2	IGSF9B	ENTPD1	TSPAN18	MYB	PTK2	GPA33	OCM	CHN1	EFHA2	SLC40A1	IL4R	IL6ST	KIAA0748	OCM2	HMGB3	CAMSAP1L1	NELL2	WNT7A	STXBP1	FAM153B	PKIA	CCNE1	CEP68	SULT1B1	RIC3	MCOLN3	LRRC16A	C16orf45	BCL9	LGMN	ZSWIM1	SFXN1	CALD1
LUCA_TCM_vs_TEM_CD8_TCELL_DN	Gattinoni et al 2011	Sig33	IL18RAP	PLD1	ST8SIA6	GNLY	GFPT2	CXCR6	THBS1	GALNT3	KLRF1	PTPRM	SYTL2	MYBL1	C2orf46	AUTS2	ZEB2	TARP	C3AR1	TARP	SLC4A4	CD244	PIK3AP1	GAB3	GBP5	DLG5	FASLG	DENND3	B4GALT5	NHSL2	SPATS2L	CRIM1	PLXND1	NPC1	GYG1	CYP4F22	CTNNA1	MAN1A1	OSBPL5	GALNT10	PLEKHA5	SH2D2A	C12orf75	MATK	PTGER2	GALNT10	FLJ00049	NCR1	RORA
LUCA_TN_vs_TEM_CD8_TCELL_UP	Gattinoni et al 2011	Sig34	ACTN1	SELL	NRCAM	SULT1B1	DSC1	AK5	SLC16A10	UBE2E2	NOG	LEF1	MAL	CDCA7L	LRRN1	LASS6	RBM11	TAF4B	NBEA	CNN3	TIMD4	KRT73	PTPRK	MYB	TSHZ2	EPHX2	MEST	IL6ST	PPFIBP2	C5orf13	KCNQ5	SLC40A1	GJB6	GCNT4	APBA2	EFHA2	BCL9	APP	EDAR	LGMN	LRRC16A	SDK2	IGF1R	TPST1	LOC129293	FAM153B	LRRC7	CHMP7	KRT72
LUCA_TN_vs_TEM_CD8_TCELL_DN	Gattinoni et al 2011	Sig35	KLRB1	GZMK	KLRD1	CCL5	IL18RAP	CST7	ZEB2	GNLY	FLJ16686	SLAMF7	MYBL1	GFPT2	PTPRM	PLXND1	ST8SIA6	PRDM1	PRR5L	GZMA	TNIP3	KLRG1	FAM129A	C1orf21	AUTS2	DUSP4	ST6GALNAC2	CXCR6	NETO2	FAS	CD58	EPHA4	THBS1	PLD1	TARP	TIGIT	F2R	PYHIN1	WEE1	GPR15	HLA-DRA	SYNE1	HLA-DRA	TOX	CYTH3	MICAL2	C17orf66	GAB3	MYO1F
LUCA_TN_vs_TCM_CD8_TCELL_UP	Gattinoni et al 2011	Sig36	NRCAM	NOG	SULT1B1	AK5	UBE2E2	MEST	SLC7A8	CNN3	SLC16A10	IGF1R	PTPRK	TPST1	LRRN1	LRRC7	RBM11	EDAR	PPFIBP2	KCNQ5	CACHD1	ACTN1	KRT73	TIMD4	NBEA	C5orf13	SDK2	GJB6	TXNRD3IT1	TMEM220	CDCA7L	LASS6	FCGBP	PRAGMIN	LRP6	DEPDC7	SERPINF1	ZNF135	ANKRD31	GNAI1	SEC14L2	DSC1	TSPAN32	ARRB1	AGBL3	FCER1G	MYO15B	KRT72	FLNB
LUCA_TN_vs_TCM_CD8_TCELL_DN	Gattinoni et al 2011	Sig37	GZMK	GPR15	CCL5	CCR4	CST7	FAM129A	FLJ16686	ENTPD1	EPHA4	SLAMF7	CDH1	KLRD1	TIGIT	FAS	NCAPH	KLRB1	TNIP3	DUSP4	PRR5L	CD58	ZEB2	WEE1	ST6GALNAC2	PLXND1	NETO2	MCOLN2	GPR183	CHN1	HLA-DRA	C1orf21	PRDM1	PYHIN1	HLA-DRA	USP46	ANXA2	F2R	MYBL1	TOX	TPRG1	SYNE1	GZMA	FOSL2	ITGB1	ST8SIA1	NBEAL2	MICAL2	LOC283174
LUCA_TSCM_vs_TEM_CD8_TCELL_UP	Gattinoni et al 2011	Sig38	ACTN1	DSC1	TSHZ2	MYB	LEF1	TIMD4	MAL	KRT73	SESN3	CDCA7L	LOC283174	TCF7	SLC16A10	LASS6	UBE2E2	IL7R	GCNT4	TAF4B	SULT1B1	SELP	KRT72	STXBP1	TCEA3	FCGBP	CXCR5	GPA33	NELL2	APBA2	SELL	VIPR1	FAM153B	PPFIBP2	FCER1G	GJB6	OCM2	GCET2	LRRN1	IL6ST	LRRC16A	IGSF9B	EFHA2	LOC129293	APP	PKIA	ZC3H12D	CHMP7	KIAA0748
LUCA_TSCM_vs_TCM_CD8_TCELL_UP	Gattinoni et al 2011	Sig39	NOG	TIMD4	MYB	UBE2E2	FCER1G	HAVCR1	FCGBP	PPFIBP2	TPST1	ACTN1	IGF1R	KRT72	SLC16A10	GJB6	LRRN1	PRAGMIN	GIPC3	FLNB	ARRB1	SLC7A8	NUCB2	LRRC7	MYO15B	MAL	AEBP1	SDK2	BZW2	GAL3ST4	PITPNM2	ZNF496	FAM117B	C16orf74	TDRD6	TSPAN32	C18orf22	C3orf44	LOC129293	ZC3H12D	MLXIP	C7orf10	STXBP1	KCNQ1	FLJ13197	LDLRAP1	RAB43	RIN3	SLC22A17
LUCA_TSCM_vs_TCM_CD8_TCELL_DN	Gattinoni et al 2011	Sig40	CCR4	FLJ16686	CDH1	PRR5L	NCAPH	SYNE1	HLA-DRA	HLA-DRA	KLRB1	FAM129A	TOX	ALOX5AP	GNAO1	SLC1A4	CYTH3	HNRPLL	CADM1	IL9R	IL9R	DUSP4	CST7	MAF	SLFN11	AUTS2	NETO2	NBEAL2	KATNAL1	PHACTR2	GNLY	FASLG	HLA-DRB5	USP46	PLEKHA5	MSC	PTPRM	WEE1	CD58	GLUL	TGFBR3	CHN1	CXCR6	PPP1R16B	ZC3HAV1L	ERN1	HMGB3	PPP2R2B	PELO
LUCA_TSCM_vs_TN_CD8_TCELL_UP	Gattinoni et al 2011	Sig41	GZMK	GPR15	CCL5	EPHA4	ENTPD1	CST7	SLAMF7	TIGIT	KLRD1	IRF4	FAS	FAM129A	TNIP3	GPR183	PYHIN1	ST6GALNAC2	MCOLN2	ZEB2	F2R	CD58	SLAMF1	WEE1	HAVCR1	ST8SIA1	RGS2	PLXND1	FOSL2	MYBL1	C17orf66	ITGB1	FLJ16686	ANXA2	PRDM1	PTGER2	SMAD3	CHN1	SLC27A2	NETO2	LOC283174	STOM	GZMA	DUSP10	EDARADD	TPRG1	ARID5B	C1orf21	TBX21
LUCA_TSCM_vs_TN_CD8_TCELL_DN	Gattinoni et al 2011	Sig42	NRCAM	SULT1B1	AK5	PTPRK	CNN3	NBEA	SLC7A8	MEST	RBM11	SLC40A1	CACHD1	KCNQ5	LRRC7	TXNRD3IT1	CAMSAP1L1	LRRN1	EPHX2	ANKRD31	IGF1R	CYP2J2	DEPDC7	NOG	LRP6	C6orf186	C5orf13	BCL9	EDAR	C2orf67	SDK2	ZNF135	OSBPL5	OCRL	IL6ST	ZNF347	GPR125	AGBL3	PAK1	ZSCAN23	LGMN	SEC14L2	HLA-DOA	PTK2	SNORD109A	SNORD109A	TSPAN32	TMOD2	PPFIBP2
SINGER_CD8_TCELL_ACT_MODULE	Singer et al, 2016	Sig43	SARS2	0610009O20RIK	ARPP19	ASRGL1	SDF2L1	TBCC	MYG1	SEPHS1	DYNC1LI1	ZBTB38	TARDBP	SLC9A8	TYK2	THUMPD3	MRPL16	ACOT8	LRRK1	HMGB1	HSPA1B	TCEA1	MAVS	POFUT2	VPS53	RIT1	SNAPC1	DNAAF2	COMMD10	PMPCB	EHBP1L1	ADAT3	DOHH	LSM4	PTCD1	GMPPB	LAMTOR1	DRG2	CDCA7L	SSBP1	ANAPC15	NAGLU	AKR1B3	PAOX	EIF4E2	GPAA1	RAD50	STX18	GRPEL1
SINGER_CD8_TCELL_DYS_MODULE	Singer et al, 2016	Sig44	NPEPPS	NOTCH2	CABLES1	CERK	MTMR3	RELB	KLF3	CAMK2D	CCNG2	SLC25A33	PIM3	RNF149	SWAP70	PINK1	RAB2A	FAM168B	MAP2K7	MIR466I	ASAP1	GRASP	POU2AF1	GATA3	B3GNT2	FAS	PIAS2	FOXO1	SEC24B	TUBB2B	PARP3	PIGH	BRAP	ATP6V0D1	IFT80	FRRS1	GPR132	SFPI1	SH2B3	WFDC17	CD74	TBC1D22B	CD19	PHC2	TRAT1	SLAMF6	YPEL3	RARA	GM9159
SINGER_CD8_TCELL_ACT_DYS_MODULE	Singer et al, 2016	Sig45	CDC45	PTPN11	GINS1	TFDP1	MLF2	PGP	POLE	HIST1H2AO	IL10RA	LDHA	SERPINB6A	ASNSD1	LCLAT1	CALR	LGALS1	NDFIP2	GPD2	RRM1	TPI1	DUSP14	MAD2L1	MLEC	CRMP1	DTL	PDCD1	INTS7	WDR3	MED14	EEA1	UAP1	FAR1	GAPDH	YWHAH	MMD	CSF1	HN1L	MDFIC	DUSP4	IL2RA	ALDOA	HIST2H3B	ENO1	SIVA1	TNFRSF4	TNFRSF9	CSRP1	IGFBP7
SINGER_CD8_TCELL_NAIVE_MEM_MODULE	Singer et al, 2016	Sig46	GPR183	THA1	TREML2	ZNRF3	CDK2AP2	CREB3	RPS16	BLOC1S2A	ATP1B3	BLNK	RPS29	SHARPIN	TSC22D1	KLRA1	HSD11B1	RPS15	AKAP8L	PHC1	RPL31	S1PR1	GM5547	SRSF5	ACSS2	ADK	ATP1B1	AMICA1	CNP	SNHG8	FCRLA	H2-T23	RAB33B	TLR12	RPF1	SP140	SH3GL1	CTSL	RPGRIP1	5430417L22RIK	RABGGTA	CXXC5	KCNJ8	DYM	FRAT1	SPIB	ADRB2	COX6A2	TMEM219
RX_C0 (Naïve-like/transitional 1)	This Study	Sig47	TIMP1	CAPG	IL9R	FXYD7	KRT1	PLP2	JAML	AHI1	NME2	CD82	CNIH1	NPC2	OSTC	SEC11C	THEM4	RCBTB2	MYDGF	FKBP2	FXYD1	ADK	UBXN11	RGCC	PTDSS1	ARL4A	NEK1	SELL	DNAJB9	PRNP	RBPJ	TMEM14C	LMO4	SLC1A4	LMNA
RX_C1 (RX-EM 1)	This Study	Sig48	GZMK	CCL4	GZMA	NKG7	GZMB	HOPX	LTB	CST7	HCST	GZMH	LYAR	GIMAP4	FGFBP2	PRF1	LITAF	LINC00861	TC2N	CTSC	NCR3	GZMM	CLEC2B	CCL3	ITGAL	FYB1	LBH	PLEK	RUNX3	AOAH	PRKCA	PTMS	KLRG1	GBP5	CDC42EP3	ZBTB38	CTSW	LPAR6	CD70	STK17A	CXCR3	PRKCB	LYST	SLAMF7	F2R	HLA-DQA1	ARAP2	FKBP11	DUSP2
RX_C2 (Naïve-like/transitional 2)	This Study	Sig49	IL9R	CERS6	CAPG	PTGDR2	AHI1	KRT1	TNFRSF18	FXYD7	FXYD1	STAM	PDE7B	ATP8B4	PTDSS1	RUNX2	PSMD1	FAM102A	PDE4DIP	NEK1	SMIM14	PPCDC	PTTG1IP	IL4R	LACTB	MFHAS1	TESPA1	SLC1A4	LAT2	TCTN3	NME7	LMO4	RCAN3	KDM5B	ANKRD28	HSDL2	TRAPPC6A	ORAI3	BIRC3	PRNP	CD82	GCNT1	LMNA	PHTF2	NAMPT	KLHL2	RHBDD2	PSMD13	GLRX3
RX_C3 (MAIT-like)	This Study	Sig50	MT-ND5	MTRNR2L12	MT-ND4L	TPT1	MT-CO1	MT-ND3	MT-ATP8	MT-CO2	MT-CYB	RPLP0	MT-CO3	RPS26	EEF1A1	NEAT1	RPL10	RPL37	RPS2	MT-ATP6	FTL	RPLP2	RPL39	RPS12	RPS27A	RPS13	RPS14	RPL41	RPS28	RPLP1	RPS8	RPL28	RPL30	RPS29	RPL23A	RPS3A	RPS25	RPS4X	RPS24	RPS23	RPS16	RPL19	RPS15A	RPL34	RPL11	RPS19	RPL13	RPL18	RPL14
RX_C4 (RX_EM 2)	This Study	Sig51	GZMK	NCR3	HLA-DQA1	CCL3	PLEK	GZMA	SLAMF7	CEBPD	GZMH	CCL4	KLRG1	CTSW	ZBTB38	FGFBP2	PRF1	HLA-DQB1	GZMB	HLA-DMA	LPAR6	KLRD1	LINC00861	IKZF3	LYAR	ITGAL	GZMM	F2R	AOAH	SH2D1A	HLA-DRB5	C1orf21	GYG1	GBP5	HLA-DRA	PITPNC1	MAPK1	ANP32A	CMC1	PRKCB	LBH	ARAP2	STK17A	ABI3	MAF	MT1E	PRKCA	PRKCH	XCL1
RX_C6 (Proliferating)	This Study	Sig52	UBE2C	TYMS	MKI67	TOP2A	BIRC5	STMN1	CKAP2L	HJURP	CENPF	CDC20	ZWINT	CDKN3	GTSE1	PTTG1	ASPM	CCNB1	HMGB3	CCNB2	CENPA	HMMR	CDK1	TPX2	NUSAP1	AURKB	RPL39L	TUBA1B	CDCA5	RMI2	TROAP	KIF14	H2AFX	CDCA3	CEP55	KIFC1	UBE2S	KIF15	CDCA2	DLGAP5	RACGAP1	KNSTRN	SPC24	CENPW	KIF11	MXD3	CDCA8	SGO1	KNL1
PBL_C5 (PBL_Eff 1)	This Study	Sig53	CLIC3	OASL	IRF7	CD6	MX1	DUSP2	KLRD1	GZMH	FCGR3A	FGFBP2	C1orf21	LAG3	SLA2	IFI6	IFI44L	XAF1	OAS1	RARRES3	SH2D2A	PRF1	PLEK	ADGRG1	CD5	ZNF683	EPSTI1	GZMB	GBP5	ABI3	APOBEC3G	JUN	CX3CR1	CASP1	TNFAIP3	AC116366.3	MATK	PARP10	LAIR2	PSME2	ARID5A	APMAP	RNPEPL1	FYN	IKZF3	ABLIM1	PATL2	ISG20	LBH
PBL_C7 (PBL_EM)	This Study	Sig54	HLA-B	HLA-C	CCL5	HLA-A	B2M	RPS26	NKG7	MT-CO1	RPL41	RPL28	RPLP1	RPL19	TMSB10	RPS15	GZMB	RPS4X	RPS12	RPL11	RPS3	MALAT1	RPL10	MT-CO2	RPL32	RPS15A	CD74	RPL30	RPL12	RPL39	RPL37	RPL13	EEF1A1	MTRNR2L12	FAU	RPS8	GZMH	ACTB	RPS19	RPL18A	CST7	TPT1	RPS7	SH3BGRL3	GNLY	GAPDH	RPS27	RPL29	RPL34
PBL_C8 (PBL_CM)	This Study	Sig55	SELL	IL7R	DUSP1	AQP3	ARID5A	IFI44L	CD55	SPOCK2	TNFRSF18	JUN	CREM	RPL36A	KRT1	SESN3	ICAM2	SOCS1	PASK	MX1	ITM2C	IRF7	PABPC1	IL4R	ALDOA	TSC22D3	ZFP36L2	SNHG8	CXCR4	MYD88	SLC3A2	CD7	S1PR1	JUNB	RGCC	PHF1	HSPA5	CD5	ABLIM1	SNED1	THEM4	GPR183	CTSA	KLF2	PTPRCAP	ARID5B	DUSP16	GABARAPL1	RHBDD2
PBL_C9 (PBL_Eff 2)	This Study	Sig56	PTPRC	HLA-B	HLA-E	HLA-A	CD38	HLA-C	MTRNR2L12	PRF1	MT-CO1	CD74	ITGB1	B2M	MALAT1	MT-CO3	LBR	SELPLG	MT-CO2	MT-CYB	TAP1	CD8A	ITGA4	CYBA	ITM2B	MT-ND4L	TMBIM6	RNF213	CD3E	MT-ATP6	SYNE2	ITGB2	GZMH	EMP3	CCL5	TGFBR3	CX3CR1	SPN	IFITM1	MT-ND1	SARAF	MT-ND4	CST7	FCGR3A	GZMB	PDIA3	LCP1	KLRD1	CD6
PBL_C10 (Term Exh)	This Study	Sig57	FCER1G	TYROBP	CST3	IFI30	NRGN	PRKAR2B	RAB31	SNCA	IFNGR2	C19orf33	AQP10	ZNF385A	HMOX1	RNF130	GMPR	SNN	BEX3	HPSE	MAP3K7CL	FHL1	LYN	MGLL	NPL	MPP1	RGS18	SPINT2	CD9	CFD	NCF2	DUSP6	PLAUR	DMTN	FGR	CD83	ATF3	FOS	SLC44A1	CD68	SGK1	CXCL16	AIF1	AP003068.2	HEBP1	SCARB2	CYP1B1	ACTN1	PARVB
CD8.Stem.Like	Krishna et al, Science, 2020	Sig58	KLF2	RASA3	FGFBP2	CDC25B	TCF7	C10orf54	LINC00861	FAM65B	RASGRP2	IL7R	SH3BP5	SLCO3A1	P2RY8	LYAR	PXN	LITAF	RAB7L1	CDKN2D	GPR155	STK38	ADD3	UBE2F	CD55	BIN1	ISG20	RAP2B	DUSP2	SAMD3	S1PR4	FAIM3	GIMAP4	TRADD	TNFAIP3	CTD-3184A7.4	LTB	CCDC109B	GZMK	NOSIP	CYTH1	SAMHD1	PHACTR2	PPP2R5C	CDC42SE1	LGALS3	SPOCK2	TSC22D3	YWHAQ
CD8.Term.Diff	Krishna et al, Science, 2020	Sig59	ENTPD1	CD69	RRM2	TYMS	CD8B	KIAA0101	CCL3	TUBA1B	MKI67	UBE2C	HLA-DQA2	CDK1	STMN1	IL5	NDFIP2	DUSP6	CSF2	XCL1	UBE2S	TOP2A	HIST1H4C	AIF1	TUBB	CLSPN	IFI27	HMMR	EGR1	KPNA2	TPX2	ZWINT	TK1	CD38	UBE2T	NUSAP1	PCNA	CENPF	H2AFX	CRTAM	ASPM	GTSE1	TNFRSF18	MYBL2	CKS1B	SPC25	CDKN3	IFNG	AURKA
Li.CD8.DYS	Li et al, Cell, 2019	Sig60	LAG3	HAVCR2	MYO7A	GBP2	GALNT1	PDCD1	TNFRSF1B	CTLA4	TNFRSF9	KIR2DL4	PAG1	ITGAE	CCL3	CD27	CSF1	RAB27A	MIR155HG	LYST	DGKH	RDH10	CXCL13	TNS3	SNAP47	ENTPD1	PHLDA1	CD7	AKAP5	IFNG	FAM3C	PTMS
TOX_Scott	Scott et al, Nature, 2019	Sig61	IGKC	AVIL	TOX	KLRB1C	MEGF11	SCD1	RP23-284K1.6	PIF1	TNFRSF8	TMEM163	NR2F6	SERPINB6B	FGR	LRRK1	SUV39H2	ESM1	CENPE	CCR2	KLRC1	NT5DC2	CD244	ASPM	FAM20A	ZDHHC2	UBASH3B	SAPCD2	SCD2	KIF20B	CCR5	ACSL3	WEE1	HMMR	SH2D5	MYO1E	CENPF	HAVCR2	EOMES	PAK6	AHR	ARSB	KLRK1	IL10	CKAP5	ALYREF	GEN1	IL24	ECT2
Grog.8EFF	Wu et al, Nature, 2020	Sig62	GNLY	NKG7	GZMH	CST7	KLRD1	GZMB	CCL5	PRF1	IFITM2	IFITM3	LITAF	HCST	ITGB2	GZMA	GPR56	GZMM	IFITM1	CD52	RAP1B	ZNF683
Grog.8EM	Wu et al, Nature, 2021	Sig63	GZMK	CCL4	CCL5	CST7	DUSP2	CD74	GZMA	NKG7	CCL3	CD8B	IFNG	CD8A	LOC100996809	HLA-A	CXCR4	GZMM	CLDND1	HLA-DRB4	DNAJB1	GZMH
Grog.8Trm.1	Wu et al, Nature, 2022	Sig64	CCL4	XCL1	CCL5	CD69	ZFP36	CD8A	XCL2	TSC22D3	FOS	ZNF683	JUN	ANXA1	LOC101060038	KLF6	CD8B	ZFP36L2	CXCR4	DUSP1	BTG1	CD7
Grog.8Trm.2	Wu et al, Nature, 2023	Sig65	KLRC2	GNLY	KLRC3	CCL5	XCL1	XCL2	CCL4	KLRD1	NKG7	ZNF683	LOC101060038	CD7	GZMB	CCL3	LOC101929531	IFITM2	TYROBP	IFITM3	KLRC4	HOPX
Grog.8Trm.3	Wu et al, Nature, 2024	Sig66	GZMB	NKG7	CCL5	GZMA	GNLY	GZMH	ACTB	CCL4	CD8A	PFN1	SH3BGRL3	IFNG	S100A4	HCST	CD74	CCL3	KLRD1	CFL1	ZNF683	CORO1A
Grog.8chrom	Wu et al, Nature, 2025	Sig67	CCL4	GNLY	XCL1	RN7SK	TNFAIP3	KLF6	IFNG	ANXA1	CCL5	LOC101060038	CD69	CD8A	HSPA1A	ZFP36L2	KLRD1	CXCR4	IL7R	FOSB	HSP90AA1	MALAT1
Grog.8Mit	Wu et al, Nature, 2026	Sig68	HIST1H4C	TUBB	TUBA1B	HMGN2	GAPDH	H2AFZ	HMGB1	HMGB2	TPI1	PFN1	ACTB	PPIA	H2AFV	DUT	CALM2	GSTP1	HMGN1	SLC25A5	CRIP1	ENO1
Grog.8KLRB1	Wu et al, Nature, 2020	Sig69	KLRB1	IL7R	NCR3	LTB	GZMK	RPLP0	GNLY	EEF1A1	NFKBIA	PRF1	KLF2	RPL17	RPL3	RPL13	RPS2	LYAR	RPL10A	SPOCK2	EEF1G	RPL4
Oh.CD8.CD39	Oh et al, Cell, 2019	Sig70	CXCL13	AC002331.1	TSPAN13	ACP5	KRT86	LAYN	TNFRSF18	KLRC2	SOX4	ENTPD1	HAVCR2	AKAP5	PPAP2A	CTLA4	CXCR6	RBPJ	GEM	GZMB	VCAM1	NDFIP2	CD7	CD9	CHN1	SNAP47	FAM3C	PHLDA1	GALNT2	MIR155HG	FKBP1A	CARS	IGFLR1	AMICA1	SIRPG	CD63	ALOX5AP	CD82	TIGIT	AC092580.4	PDCD1	HLA-DRA	CKLF	NAB1	RP11-291B21.2	RGS1	LSP1	LAG3	KLRC1
Oh.CD8.Naive	Oh et al, Cell, 2019	Sig71	GZMK	CST7	CRTAM	ITM2C	GPR183	CLDND1	CMC1	CD74	CCR7	TRAT1	DUSP2	CD44	SH2D1A	YPEL5	PPIL4	RGCC	CXCR4	TUBA4A	YBX3	PIK3R1	NAA50	LYST	LDHA	OAZ1	RHOH	ISG20	GZMM	LITAF	ARID5A	LMNA	ZNF331	HLA-DQB1	CCSER2	LEPROTL1	SLBP	SRSF7	DNAJB9	CREM	WIPF1	CALM2	RNF19A	CD27	DUSP4	CALM1	TERF2IP	SBDS	RPL27A
Oh.CD8.HSP	Oh et al, Cell, 2019	Sig72	HSPA1B	DNAJB1	HSPA1A	HSPA6	ZFAND2A	BAG3	FOS	SERPINH1	HSPB1	JUN	IFNG	NR4A1	DNAJB4	DUSP1	MRPL18	HSP90AA1	HSPE1	DNAJA1	FOSB	ATF3	CACYBP	FKBP4	HSPH1	HSP90AB1	KLF6	TNFSF14	DEDD2	MXD1	CD69	PPP1R15A	ANKRD37	HSPD1	RHOB	CHORDC1	NEU1	AHSA1	RGS2	CITED2	HSPA8	CLK1	TUBA1A	TAGAP	MIR24-2	DDIT3	CCL3	SERTAD1	CDC42EP3
Oh.CD8.MAIT	Oh et al, Cell, 2019	Sig73	CCR6	KLRB1	IL7R	TMIGD2	LTB	GPR183	CCR7	RORA	CD55	EEF1A1	FTH1	SC5D	IFNGR1	NFKBIA	ODF2L	TMEM66	NOSIP	EEF1B2	LMNA	ZFP36	PABPC1	EIF3E	TPT1	FKBP11	RPS3A	RPLP0	RPL22	AIM1	RPL5	PFKFB3	GLTSCR2	RGCC	SPOCK2	RPL10	RPS12	RPL9	RPL17	ZFP36L2	NDFIP1	RPSA	GCHFR	ARL4A	RPS5	VIM	SOCS1	FAM177A1	RPL7
Oh.CD8.FGFBP2	Oh et al, Cell, 2019	Sig74	FGFBP2	PRSS23	FCGR3A	GNLY	S1PR5	C1orf21	LAIR2	CEP78	GZMH	NKG7	SPON2	FLNA	RAB7L1	PLAC8	S100A4	EFHD2	KLRD1	KLF3	GZMB	C12orf75	PRF1	KLRG1	DSTN	ITGB1	LGALS1	HIST1H1D	BIN2	ITGB2	MYL12A	DIP2A	PTPRE	CD52	MYO1F	SSBP4	CTSW	AES	HOPX	IFITM2	SELPLG	CD47	SAMD3	EMP3	PFN1	RNF125	TMSB10	ATP2B1	CALM1
Oh.CD8.RPL	Oh et al, Cell, 2019	Sig75	RPL10	RPS27	RPL13A	RPS19	RPS2	RPS27A	RPS14	RPL34	MALAT1	RPS4X	RPLP1	RPS18	RPL13	RPL3	RPS6	RPS3A	RPL7	RPL32	RPL18A	RPL11
Oh.CD8.MITO	Oh et al, Cell, 2019	Sig76	MT-CYB	MT-CO2	MT-CO1	MT-CO3	MT-ATP6	MT-ND2	MT-ND4	MT-ND1	MT-ND5	MT-ND3	MT-ND4L	MALAT1
Oh.CD8.XCL	Oh et al, Cell, 2019	Sig77	XCL1	XCL2	CCL4	AC092580.4	ZFP36	RGCC	CD7	ZFP36L2	CD69	KLF6	ID2	CD52	PABPC1	BTG1	TMSB4X
Oh.CD8.CM	Oh et al, Cell, 2019	Sig78	SELL	CCR7	RNF125	YBX3	CNOT6L	EZR	RGCC	RNF19A	AIM1	CREM	GZMK	PDCD4	SMCHD1	EEF1B2	S1PR4	LMNA	DDX21	GLTSCR2	KLF2	ARID5A	CHD1	FAM177A1	BAZ1A	DUSP2	KTN1	ETS1	DDX3X	SKIL	PABPC1	PDE4B	TMEM66	GPR183	MCL1	MT-ND2	TSPYL2	YPEL5	GSPT1	MT-ND1	SELK	RPLP0	EIF4G2	TGFB1	CD55	EIF4A3	PIK3R1	RSL1D1	IDI1
Oh.CD8.PRO	Oh et al, Cell, 2019	Sig79	UBE2C	SPC25	AURKB	DLGAP5	BIRC5	RRM2	CCNB2	APOBEC3B	CDCA8	GTSE1	ZWINT	TK1	RAD51AP1	KIAA0101	MKI67	STMN1	TYMS	CDC20	KIFC1	CCNA2	TOP2A	NUF2	ASPM	ORC6	CENPW	SGOL1	NCAPG	TPX2	CKAP2L	ASF1B	CKS1B	CDKN3	HIST1H2AJ	CDK1	UBE2T	HIST1H1B	CENPU	NUSAP1	CCNB1	GGH	TUBB	CENPF	MAD2L1	SMC2	PRC1	CLSPN	RNASEH2A
LCMV_PROG.EX_Miller	Miller et al, Nature Immunology, 2018	Sig80	ID3	CCR7	CD83	BACE2	ITGA7	TNFSF11	IL1R2	SOSTDC1	DAPL1	BMP7	GCAT	FAM160A1	IL7R	TNC	SERPINA9	SLC43A1	ART3	PGCP	2610019F03RIK	WNT3	TUBA8	CCR6	WNT1	SHANK1	OAF	MAGED1	MORN4	SCMH1	NSG2	PAQR8	KIT	BC048355	4930583H14RIK	TWIST2	SLC12A8	HSD3B7	TCF7	1700019D03RIK	H2-OB	ROPN1L	XCL1	CD22	FCRL1	TNP2	MMP10	FAM190A	LTA
LCMV_TERMN.EX_Miller	Miller et al, Nature Immunology, 2018	Sig81	1810011H11RIK	ACOXL	CD244	RASD2	FCER1G	OSGIN1	CCL6	CD200R2	GM10389	CDK14	GPR56	AA467197	CSF1	SLC16A10	GZMA	SFPI1	RAC3	P2RY6	HTRA3	IL20RA	E230016K23RIK	GPR97	CHN2	5031414D18RIK	VILL	KLRA3	KLRA7	RANBP17	S1PR5	GM4956	TYROBP	HEYL	TIFAB	KLRA9	AGPAT9	KLRB1C	ENTPD1	INSC	RAB3IL1	CHIT1	GLP1R	HDHD3	ATG9B	ARAP3	TRPC1	FAM19A3	SERPINB1A
B16_PROG.EX_Miller	Miller et al, Nature Immunology, 2018	Sig82	CCR6	TCF7	AFF3	CXCR5	DAPL1	ID3	SLAMF6	OTX1	CD22	TNFRSF25	VAT1L	2610019F03RIK	HECTD2	MAPK11	ART3	TNFSF14	TNFSF8	S1PR1	FAM84A	PGCP	LIF	TREML2	SYNPO	SOSTDC1	WNT10A	KCNMB1	CD40LG	DTX1	DHRS3	SELL	ST8SIA1	TNFRSF13B	CXXC5	PLA2G4F	XCL1	CD83	CYR61	KLF3	S1PR5	FAM160A1	SH2B3	TESPA1	LRIG1	IL18	NSG2	SSPO	TBC1D4
B16_TERMINAL.EX_Miller	Miller et al, Nature Immunology, 2018	Sig83	GZMD	GZMG	GZMF	GZME	DSC2	RASD2	CCL9	LTF	CCR1	1810011H11RIK	IGSF5	GZMC	HTRA3	LTB4R1	CD200R2	LGI2	KLHL30	MGAT3	SERPINB9B	GLIS1	FCRL6	PRPH	LRRN4	HAVCR2	CD244	5830473C10RIK	RASSF6	GPR56	GZMB	1300014I06RIK	FILIP1	CDKN2A	GPR97	AA467197	ADAM8	CDH17	FCER1G	EPDR1	CHL1	IL1R2	CCL3	SPP1	ACOXL	ENTPD1	CALCA	CTNND2	NEB
KAECH_NAIVE_VS_DAY8_EFF_CD8_TCELL_UP	http://www.broadinstitute.org/gsea/msigdb/cards/KAECH_NAIVE_VS_DAY8_EFF_CD8_TCELL_UP	Sig84	FAM101B	AMPD3	HMP19	DUSP6	ADCY6	NR4A3	FAM134B	FNTB	ST6GAL1	CNN3	IGHM	IL7R	EYA2	PRMT3	RPS19	CTSL2	CCR7	PLEKHA1	RAMP1	ZNRF1	SESN1	IL6R	CASK	TLR6	ZBTB20	ITGAE	RERE	PCCB	XPC	EPHX1	RBM38	OVGP1	CCND2	EML5	SATB1	NOMO1	RPS8	C13orf15	SSBP2	NOTCH1	SELL	SMAD7	RAB3IP	RALGPS2	HLA-DOB	MAP7	SLC12A7
KAECH_NAIVE_VS_DAY8_EFF_CD8_TCELL_DN	http://www.broadinstitute.org/gsea/msigdb/cards/KAECH_NAIVE_VS_DAY8_EFF_CD8_TCELL_DN	Sig85	HOPX	ID2	LGALS1	GSG2	NDUFV3	S100A6	S100A11	ANXA1	RACGAP1	GZMB	LGALS3	LXN	CCR5	S100A4	COX17	CCR2	ACOT7	IFNG	MBD2	KLRG1	CTLA4	DBI	CD48	KLRK1	RSU1	PRRC1	CDC34	CXCR3	BHLHE40	UBE2J2	GLRX	CRIP2	PQLC3	ANXA2	GZMK	CASP1	MNS1	ITGB1	FASLG	BCL2A1	REEP5	FRG1	DCPS	AHNAK	ACYP2	ITGA4	IL18R1
KAECH_NAIVE_VS_DAY15_EFF_CD8_TCELL_UP	http://www.broadinstitute.org/gsea/msigdb/cards/KAECH_NAIVE_VS_DAY15_EFF_CD8_TCELL_UP	Sig86	EML5	KLK8	GALK1	METTL9	PRKD2	C8orf42	TNFAIP8L1	HAGH	NR2C1	CD8A	GRK6	IDH2	HMP19	ZNRF1	HPCAL1	ADCY6	RNASET2	ITK	FAM101B	RGS10	EPB41L4A-AS1	ITGAE	ARRB1	TUBB	RAMP1	P4HA1	SELL	ACTN1	CD5	MPP1	CCR7	CCDC53	ID3	C15orf39	FNTB	CSAD	SESN1	SNHG6	IL6R	ZFR	KCNN4	EVL	SMC4	GSTK1	INADL	TMEM66	PRMT3
KAECH_NAIVE_VS_DAY15_EFF_CD8_TCELL_DN	http://www.broadinstitute.org/gsea/msigdb/cards/KAECH_NAIVE_VS_DAY15_EFF_CD8_TCELL_DN	Sig87	BCL2A1	ID2	MAPRE2	COX17	KLRG1	ITGAX	CASP1	LGALS1	GZMK	FASLG	KLRK1	IL18RAP	RORA	PRF1	DENND5A	CCR5	AQP9	S100A6	EMP1	MYO1F	ANXA2	CXCR3	PRR13	RSU1	RRBP1	FCGR2B	TXNDC5	KCNJ8	AHNAK	GZMA	ANXA1	GZMB	CCL5	MDFIC	CCR2	HOPX	KLF10	CARHSP1	NRP1	BHLHE40	F2R	CRTAM	HMGB2	IFITM10	DOCK5	CSDA	RACGAP1
KAECH_NAIVE_VS_MEMORY_CD8_TCELL_UP	http://www.broadinstitute.org/gsea/msigdb/cards/KAECH_NAIVE_VS_MEMORY_CD8_TCELL_UP	Sig88	MFHAS1	PRKCB	RAMP1	FAM134B	ADCY6	CNN3	NAB2	SMC4	ST6GAL1	IDH2	C8orf42	ITGAE	RNASET2	MAP4K2	RAB3IP	IGHM	MYB	PBX2	SESN1	TNFAIP8L1	EPHX1	CRAMP1L	PPIC	NDRG1	KIF23	USP34	NCBP1	TMEM50B	GPD2	PSMA5	ZFAND5	WDR26	CSAD	MAP7	ACTN1	ANAPC5	SFMBT2	ID3	GRK6	ABLIM1	IL6R	CXXC5	CASK	FAM101B	RALGPS2	BTBD1	PWP1
KAECH_NAIVE_VS_MEMORY_CD8_TCELL_DN	http://www.broadinstitute.org/gsea/msigdb/cards/KAECH_NAIVE_VS_MEMORY_CD8_TCELL_DN	Sig89	TSPAN31	CCR5	IFNG	FASLG	NRP1	ANXA2	CCR2	CD44	HOPX	ID2	ANXA1	KLRK1	S100A6	CASP1	KLRG1	GZMM	KLF6	CXCR3	LGALS1	CCL5	GZMB	KCNJ8	IL18RAP	IFITM10	F2R	MAPRE2	GSTO1	PRR13	EOMES	FOSB	ITGAX	SNX10	ADAM19	CRTAM	EMP1	MCART6	ELL2	ERRFI1	FCGR2B	AHNAK	PRDX2	IL18R1	HMGB2	RORA	MYO1F	DOCK5	BHLHE40
KAECH_DAY8_EFF_VS_DAY15_EFF_CD8_TCELL_UP	http://www.broadinstitute.org/gsea/msigdb/cards/KAECH_DAY8_EFF_VS_DAY15_EFF_CD8_TCELL_UP	Sig90	BTF3	CMAS	N6AMT2	DCPS	AK3	MYCBP	DBI	LGALS3	PSMD8	TRDMT1	ETFB	NDUFV2	PTGR1	SSNA1	COIL	GZMB	TXNDC17	GLRX	RACGAP1	PRRC1	TAGLN2	CCDC12	GZMK	CTNNA1	SUGT1	CCDC53	MED28	NFE2	MRPL43	LXN	TOP2A	LGALS1	FRG1	SRP14	CCNB2	PLP2	ROM1	ARL6	GNPDA1	COX17	EIF3D	RPL13A	NCBP1	PPP2R4	CASP7	REPS1	CRYM
KAECH_DAY8_EFF_VS_DAY15_EFF_CD8_TCELL_DN	http://www.broadinstitute.org/gsea/msigdb/cards/KAECH_DAY8_EFF_VS_DAY15_EFF_CD8_TCELL_DN	Sig91	IL7R	RPS19	GNG12	FAM101B	XPC	KCNJ8	DNAJB2	C8orf42	NEDD4L	PLK2	HSD17B11	ZNF398	RGS10	GADD45A	PER1	VKORC1	HIST1H1C	TCF7	MAT2A	TAPBP	C19orf48	ZBTB20	MLL	AHI1	TFCP2	ZNF187	CD22	CXCR5	C9orf114	WASF2	NIT2	RPL5	HOXC5	SUN2	RPS6KC1	PKD1	OVGP1	RNF141	POU6F1	PARP8	POLG	P2RX4	C14orf126	AXIN1	POU2F1	PRNP	BCL2L2
KAECH_DAY8_EFF_VS_MEMORY_CD8_TCELL_UP	http://www.broadinstitute.org/gsea/msigdb/cards/KAECH_DAY8_EFF_VS_MEMORY_CD8_TCELL_UP	Sig92	GZMB	FRG1	AK3	PSMD8	LGALS3	CD48	ADAM8	S100A4	SRP14	LGALS1	PTPRA	MRPS17	GLRX	KIF22	REEP5	GSG2	CRY1	HBXIP	SMAP1	N6AMT2	HK2	COX17	GNPDA1	NDUFV3	CDC25C	CASP7	PQLC3	DBI	NCBP1	REPS1	BATF	GSN	TOP2A	RACGAP1	ATP6V0E1	MRPL43	CCNB2	PSMA2	GZMA	ITGA4	ETFB	RRM2	IRF8	UBL5	NDUFV2	ANXA1	LAT2
KAECH_DAY8_EFF_VS_MEMORY_CD8_TCELL_DN	http://www.broadinstitute.org/gsea/msigdb/cards/KAECH_DAY8_EFF_VS_MEMORY_CD8_TCELL_DN	Sig93	HMP19	KCNJ8	C8orf42	DUSP6	FAM101B	IL7R	VKORC1	KLF4	EYA2	SSBP2	CCR7	RPS19	SMAD7	RGS10	TCF7	HSD17B11	CD7	C19orf48	RPL6	SELL	PLEKHA1	PDK1	RHOB	P2RX4	NR1D2	FOSB	SLC12A7	EVL	GALNT11	CD72	PARP8	SLC11A2	DUSP1	PRSS12	FAM134B	TAPBP	ARRB1	ZFP36	RPL14	AQP9	ZBTB20	WDR92	TP53	EIF1	NEDD4L	SKI	IFNAR2
KAECH_DAY15_EFF_VS_MEMORY_CD8_TCELL_UP	http://www.broadinstitute.org/gsea/msigdb/cards/KAECH_DAY15_EFF_VS_MEMORY_CD8_TCELL_UP	Sig94	ANXA1	RECQL5	GZMB	IL18RAP	MLL5	GZMA	KLRG1	TTC14	ALCAM	PSMD8	IL1B	FCER2	CD40	CCR6	DENND5A	RORA	FANCM	ZPBP	ZNF821	EMP1	CD86	ENTPD6	HK2	RHD	ANXA2	HS2ST1	GABARAPL1	SS18L2	IRF5	CD9	ADAM8	ENTPD1	ID2	C9orf16	LGALS3	PRR5	LAMC1	FADS1	FAM132A	CMBL	LY86	KRTCAP2	CD4	FCGR2B	PLXNB2	MYADM	MTMR1
KAECH_DAY15_EFF_VS_MEMORY_CD8_TCELL_DN	http://www.broadinstitute.org/gsea/msigdb/cards/KAECH_DAY15_EFF_VS_MEMORY_CD8_TCELL_DN	Sig95	MOGS	HSPE1	IL6R	CD7	SMAD7	GSTO1	KLK8	CXCR3	IFNAR2	HMP19	AFM	SELL	DYM	RHBDL3	HPCAL1	RGS10	LCP1	SOCS1	ITGB7	TMEM126A	CTNNA1	SMAD1	TCF7	PRSS12	CSAD	FAM101B	HDAC7	RPSA	EYA2	BCL2	C8orf42	IL4R	SMYD2	GOSR1	MRPL23	MAP3K5	KCNN4	GALNT10	PYCR2	ITK	EVL	SPRYD7	LYSMD2	AQP9	IKBKB	ANXA5	LDHA
GOLDRATH_NAIVE_VS_EFF_CD8_TCELL_UP	http://www.broadinstitute.org/gsea/msigdb/cards/GOLDRATH_NAIVE_VS_EFF_CD8_TCELL_UP	Sig96	ETS2	WDR74	TTC27	WDR75	INPP5B	ZFP1	LYSMD2	RGL2	TBCE	HSD17B8	MEPCE	P2RX4	RGS10	SLC12A7	TRIM28	DAXX	C8orf42	DGKA	CCND2	RPLP1	SNRK	MCCC1	ST6GAL1	ICAM2	IGHM	CANT1	FAM101B	ID3	ABCD3	BCL6	HMHA1	SURF2	PDK1	IL4R	DPH5	CCR7	HEXA	SHISA5	REV3L	SATB1	CCNL2	NSMCE1	BBS9	BPHL	STK10	CDIPT	UBA7
GOLDRATH_NAIVE_VS_EFF_CD8_TCELL_DN	http://www.broadinstitute.org/gsea/msigdb/cards/GOLDRATH_NAIVE_VS_EFF_CD8_TCELL_DN	Sig97	NCAPH	IRF4	IFI30	NRP1	CKS1B	CDK1	MCM10	PCNA	TPI1	GZMK	EFHD2	CDKN3	MAPRE2	SNX10	PRC1	CASP3	AURKB	H2AFZ	ANLN	CENPA	CDC25C	ANXA4	PRF1	RFC5	CDCA5	IFNG	ARHGAP21	RAD51	CD244	AURKA	BCL2A1	ERRFI1	LITAF	IGJ	SERPINB9	GNG10	GLRX	NUDT4	MIS18BP1	LYN	BIRC5	FHL2	GEM	MAD2L1	KIF4A	KIF11	CCNF
GOLDRATH_NAIVE_VS_MEMORY_CD8_TCELL_UP	http://www.broadinstitute.org/gsea/msigdb/cards/GOLDRATH_NAIVE_VS_MEMORY_CD8_TCELL_UP	Sig98	ADCY6	UCK2	EXT1	ST6GAL1	TMEM50B	C8orf42	EPHX1	KIF23	MPP1	RAMP1	EGR1	PPIC	FRMD6	DDX3Y	IL6ST	CXXC5	GSN	TSPAN32	ENG	ISG20	TUBA1A	ITGAE	CRY1	ACTN1	IFI27L2	DGKA	CNN3	NR4A3	ACTN2	CNGA1	TUBB3	HLA-DOA	CD5	ISG15	SNRK	RAPGEF4	LEF1	SLC12A7	RMND1	NSMCE1	CD8A	STT3B	LGALS3BP	FAM101B	EHD1	TSC22D1	LTB
GOLDRATH_NAIVE_VS_MEMORY_CD8_TCELL_DN	http://www.broadinstitute.org/gsea/msigdb/cards/GOLDRATH_NAIVE_VS_MEMORY_CD8_TCELL_DN	Sig99	BCL2A1	GZMK	SNX10	LITAF	EOMES	ERRFI1	CCR5	PLSCR1	EMP1	CCR2	DOCK5	ITGAX	S100A6	PRSS12	CST7	GLRX	KLRK1	GZMB	MYO1F	KCNJ8	NRP1	GSTO1	S100A4	RNASE4	MDFIC	CCL5	CAPN2	FASLG	TMEM37	ANKH	ART3	CTNNA1	BHLHE40	LGALS3	VKORC1	KLRG1	PHF13	SKAP2	ANXA1	ANXA2	PTPN22	FGL2	IL18RAP	CHPT1	ST3GAL6	CXCR3	FCGR2B
GOLDRATH_EFF_VS_MEMORY_CD8_TCELL_UP	http://www.broadinstitute.org/gsea/msigdb/cards/GOLDRATH_EFF_VS_MEMORY_CD8_TCELL_UP	Sig100	CDKN3	BIRC5	CKS1B	KIF23	ANLN	NCAPH	RAD51	TACC3	CD99	GEM	TUBB3	CDK1	TTK	PRC1	TUBA1C	SIVA1	BUB1	CD244	BRCA1	KIF11	AURKB	ANXA4	LITAF	FGL2	CDKN2C	KIF4A	TUBA1A	ASPM	IRF4	MAD2L1	PSMA5	TK1	GZMA	KIF20A	EMP3	POLA1	AURKA	TMEM97	ATPIF1	CDCA3	GMNN	MT1E	MKI67	NUSAP1	UCK2	ECT2	NEK2
GOLDRATH_EFF_VS_MEMORY_CD8_TCELL_DN	http://www.broadinstitute.org/gsea/msigdb/cards/GOLDRATH_EFF_VS_MEMORY_CD8_TCELL_DN	Sig101	C8orf42	FAM101B	ZFP1	RGS10	GMIP	RPS19	CCR7	TRAF1	VKORC1	PRSS12	EOMES	GALNT11	MRPL23	FAM189B	TSEN34	RPP14	RPLP1	TTC14	HSD17B11	TXK	EIF2AK4	TRMT1	MBP	ITPR2	BRD3	SIX6	SLC12A7	SESN1	RASA4	ARL4C	DGKA	CD7	PDRG1	MCOLN2	ACP5	PPP1R14B	METTL3	CHCHD7	PDK1	LAMP1	SNRK	DPH5	TCF7	ANKRD10	IL6R	RPL14	PRMT3
GSE10239_NAIVE_VS_MEMORY_CD8_TCELL_UP	http://www.broadinstitute.org/gsea/msigdb/cards/GSE10239_NAIVE_VS_MEMORY_CD8_TCELL_UP	Sig102	GPHN	WDR26	NUP62	AMPD1	ACSL3	ST8SIA1	TUBB2A	APPL2	LIN9	PIK3IP1	SATB1	LUC7L3	RNF19A	C5orf43	RPL23	MTF2	CXorf56	HOOK1	C21orf91	RAD21	FBXO9	PPP1CC	SNRPA1	GABPA	OGT	ACAP2	FAM63B	EPS15	GET4	CDCA4	ZNF157	TRIM56	PPM1K	C9orf93	CD2AP	G2E3	C1orf52	CCR9	NDRG1	REV3L	DIRC2	SETD6	FAM91A1	BACH2	SMARCC1	KLHDC2	ZNF384
GSE10239_NAIVE_VS_MEMORY_CD8_TCELL_DN	http://www.broadinstitute.org/gsea/msigdb/cards/GSE10239_NAIVE_VS_MEMORY_CD8_TCELL_DN	Sig103	ATP5G2	TAF12	FAM103A1	DYNLRB1	CD84	DNAJC15	SEC61G	ZBTB39	FAM19A3	BEST1	TMEM239	HEATR7B1	S100A5	EIF2AK2	COX6C	UQCR10	PHACTR3	URM1	HLA-A	CRTAM	SP110	TFR2	GFOD1	TRPM6	KLF1	GOT1L1	DACH1	LOC100506257	NRXN2	SMEK1	BTF3	NDUFA7	CNTFR	RAP1GAP	GSTT1	AHDC1	PLCB2	NPR1	ARL4D	SERPINA12	FCGR2B	MAPRE2	TPRN	SLC34A1	CASP1	RHOC	UBE2N
GSE10239_NAIVE_VS_KLRG1INT_EFF_CD8_TCELL_UP	http://www.broadinstitute.org/gsea/msigdb/cards/GSE10239_NAIVE_VS_KLRG1INT_EFF_CD8_TCELL_UP	Sig104	RAB12	NPRL3	RPS14	ZNF777	C21orf91	IL6R	PDK1	SH3GL1	RPS11	RPS7	C1orf182	RPL7	PRRC2C	IRF2BP2	C1orf63	NCOA2	TMEM71	RIOK2	EPS8L1	GPANK1	SOCS3	RPL35	C9orf156	TEX264	BMF	ORMDL3	IER5	CCDC102A	KLB	CCDC72	RPL19	THYN1	RPL22	GLG1	LPHN1	FAM63B	RGP1	DUSP11	RNF130	AMPD3	OMP	SLC25A22	CHST15	DNAJC17	MLYCD	ALS2CL	SLC37A1
GSE10239_NAIVE_VS_KLRG1INT_EFF_CD8_TCELL_DN	http://www.broadinstitute.org/gsea/msigdb/cards/GSE10239_NAIVE_VS_KLRG1INT_EFF_CD8_TCELL_DN	Sig105	STMN1	B4GALT5	WEE1	FAM110A	HNF1B	CENPH	C5orf62	STARD8	C13orf27	ARHGAP19	TNFRSF1B	AP3S1	PRDM1	TUBB4B	ANXA2	RFC5	LGALS2	SRCIN1	GEM	NXT1	CISD3	SYCE2	THOC4	NECAB3	ALAD	LHPP	HLA-A	NEO1	PLK4	SLC43A3	MAPRE2	GLDC	ZNHIT3	NMNAT1	ZMYM3	WDR61	DPY30	SLC35D1	ENDOD1	PSMD13	DECR1	ATPIF1	FKBP1A	ZCCHC4	EME1	MICAL2	LRP8
GSE10239_NAIVE_VS_KLRG1HIGH_EFF_CD8_TCELL_UP	http://www.broadinstitute.org/gsea/msigdb/cards/GSE10239_NAIVE_VS_KLRG1HIGH_EFF_CD8_TCELL_UP	Sig106	PDE7A	AGRN	MEA1	TREML2	RPS14	IER5	CARD6	NPHS2	CCDC102A	LIMD1	BCL11B	RNF11	43714	IDS	NTPCR	RPL35	ST8SIA1	SOCS3	THYN1	C1orf63	RPL13	C4orf40	ACVR1B	SLFN12L	PIGV	TNFRSF1A	TMEM66	SATB1	SLC37A1	C19orf6	SSH2	YEATS4	RPL7	RPS11	VPS8	DCDC2B	ID3	RBM6	RCN3	ELANE	TNFAIP8L2	ZNF622	DIRC2	EPS8L1	ZNF710	TCP11L2	UBN1
GSE10239_NAIVE_VS_KLRG1HIGH_EFF_CD8_TCELL_DN	http://www.broadinstitute.org/gsea/msigdb/cards/GSE10239_NAIVE_VS_KLRG1HIGH_EFF_CD8_TCELL_DN	Sig107	SAR1B	MRPL15	AP3S1	ELL2	PRDM1	PLIN2	NR1H4	RFC5	MYO5A	CCR5	TSPAN33	GEM	FHL1	RILPL2	PRC1	CYFIP1	CAPN2	MPP6	MRPS10	SLC43A3	ENDOD1	TNFRSF1B	CDKN1A	CCNE1	MAPRE2	GSG2	FAM54A	SNX10	AURKB	ATPIF1	KIF22	GLDC	HLA-A	TIAM1	SLAMF7	GNPDA1	MT2A	CDC20	LGALS3	RAD54L	DCTPP1	TMEM163	RPH3AL	ANLN	SDF2L1	ARHGAP19	STMN1
GSE10239_MEMORY_VS_KLRG1INT_EFF_CD8_TCELL_UP	http://www.broadinstitute.org/gsea/msigdb/cards/GSE10239_MEMORY_VS_KLRG1INT_EFF_CD8_TCELL_UP	Sig108	URM1	SIGLEC1	RREB1	EPS8L3	ATXN7L2	SFRP1	SLC22A18	FCGR1A	MAP2K2	CNRIP1	FGFRL1	TREML2	FAM19A3	C20orf29	CXorf38	AQP12A	IGLL1	ZBTB39	UBOX5	TBC1D12	NTN5	ATP6V1C2	RHD	SFTPB	POTEH	HCAR1	KCNJ11	CAMK1G	TRPM6	GPBP1L1	RLTPR	SATL1	CCDC84	SLC25A47	COTL1	SON	TLE6	UBTD1	MBD2	ZNF444	MYCBPAP	A1CF	ZSWIM5	ZNF335	C2orf82	TCP11L2	TTC26
GSE10239_MEMORY_VS_KLRG1INT_EFF_CD8_TCELL_DN	http://www.broadinstitute.org/gsea/msigdb/cards/GSE10239_MEMORY_VS_KLRG1INT_EFF_CD8_TCELL_DN	Sig109	PTGER4	CLDND1	GPSM2	CENPA	ADA	ACO1	ACYP2	MAP3K7	DEPDC1B	APITD1	EXOC3L1	SKA3	TNFSF9	CHMP4B	FBXO8	SYCE2	TRAK2	PDPR	TMEM59	TRMT6	LYRM4	TM7SF2	SKAP2	PTGR2	MTHFD1L	LPIN2	CAT	GSTO1	TNFRSF13B	GSR	KDM1B	HMGB2	C1GALT1	DGCR8	CDK2	SNIP1	PROX1	PPIC	HMGB3	TMEM183A	CDC16	DAXX	GOLPH3	NMNAT1	C9orf128	CENPH	PTCH1
GSE10239_MEMORY_VS_KLRG1HIGH_EFF_CD8_TCELL_UP	http://www.broadinstitute.org/gsea/msigdb/cards/GSE10239_MEMORY_VS_KLRG1HIGH_EFF_CD8_TCELL_UP	Sig110	C8orf33	HPX	SNRPD1	TMEM25	TRPM6	RAB37	TBC1D12	LTB	DLX3	GREB1	PLXNA3	PTPRF	KLHL26	SYNE2	GPX7	SATB1	CARD6	TXNIP	EPS8L3	SERPINA12	MDM4	ASPHD1	ZBTB39	TCP11L2	SON	IL10RB	DBNDD2	ALOX5	ARHGAP28	OLR1	CPNE6	MPPED1	BBX	CLEC16A	ALB	C20orf85	WFDC5	DUSP8	MRPS34	UBN1	APOBR	ANKZF1	EVL	SYT12	FHIT	C11orf94	STAMBP
GSE10239_MEMORY_VS_KLRG1HIGH_EFF_CD8_TCELL_DN	http://www.broadinstitute.org/gsea/msigdb/cards/GSE10239_MEMORY_VS_KLRG1HIGH_EFF_CD8_TCELL_DN	Sig111	GAPVD1	GPSM2	TMEM183A	TUBB2A	ZNF507	TM7SF3	CNOT7	ARFIP1	LPIN2	CDC20	POGZ	CENPA	AURKB	FAM164C	TTC35	ACO1	PLEKHH1	GINS3	C2orf69	C3orf26	LAMTOR3	SKAP2	RAD21	ITPR1	PCSK9	EPS15L1	KIFC1	GMCL1	DLAT	MTHFD1L	CPNE1	MAP3K7	PRC1	NUDT4	DR1	CHORDC1	BCAP31	GRM4	TMEM93	SLC9A6	ANLN	DHPS	COQ3	SOCS4	KIF22	RAD51C	HCCS
GSE10239_KLRG1INT_VS_KLRG1HIGH_EFF_CD8_TCELL_UP	http://www.broadinstitute.org/gsea/msigdb/cards/GSE10239_KLRG1INT_VS_KLRG1HIGH_EFF_CD8_TCELL_UP	Sig112	TMEM69	PABPC4	ITIH1	ANKRD37	ALKBH6	ACOT7	EIF2B5	WNT4	DHX30	TRIM28	PRDX3	FAM43B	SUSD3	TPI1	LDHB	CYB5B	KCNK10	SLC25A33	RAE1	ESRP1	MED18	WBSCR22	POLR2D	MRPL44	GGA2	SLC25A26	NDN	ATP4A	C5orf62	FDPS	SIAH2	TPD52L2	LSM2	MRPS30	GCN1L1	EIF4A3	C14orf169	LINGO2	PCDP1	FSD2	DTD1	PGP	VAC14	GPX1	C19orf48	ADCK5	DBH
GSE10239_KLRG1INT_VS_KLRG1HIGH_EFF_CD8_TCELL_DN	http://www.broadinstitute.org/gsea/msigdb/cards/GSE10239_KLRG1INT_VS_KLRG1HIGH_EFF_CD8_TCELL_DN	Sig113	FAM184A	MS4A7	ERI1	WDR7	SEMA5A	FAM164C	AP3B1	IGSF21	NUF2	EMR1	RELL1	SLC4A10	NGLY1	ARHGEF6	PLEK	HCFC2	ATL2	CSF3R	TTF1	TAF5	NUSAP1	REEP3	SMARCAL1	ITGA6	RASGRP1	DDX58	SPTY2D1	C2orf72	PCDHB1	MLLT10	RHOQ	SNX18	NCOA2	CD300A	DLGAP5	VPS41	SH2D1B	RSPO4	SGOL1	HMGXB4	MYOZ1	TOP2A	APAF1	HERC1	F2R	CAMK1G	FAM175B
GSE10239_NAIVE_VS_DAY4.5_EFF_CD8_TCELL_UP	http://www.broadinstitute.org/gsea/msigdb/cards/GSE10239_NAIVE_VS_DAY4.5_EFF_CD8_TCELL_UP	Sig114	ZBTB4	CCR9	SLC6A19	USE1	RPL26	AKAP8L	DIRC2	AMPD1	RPS7	ZNRF1	SMYD3	CARD6	RPLP2	RPL37A	ZNF622	ZZEF1	ID3	SSH2	RPL22	RPS21	C20orf30	ST8SIA1	SLC14A1	CCM2	STK4	MED13L	GPHN	NFKBIE	DTX1	UBE2H	RPL11	UBAC2	RPS18	BACE1	C7orf41	RPS11	IRF2BP2	FAM120B	SLC17A9	TCP11L2	C13orf15	TECPR1	DUSP2	IL16	FAM101B	RBM6	SH3GL1
GSE10239_NAIVE_VS_DAY4.5_EFF_CD8_TCELL_DN	http://www.broadinstitute.org/gsea/msigdb/cards/GSE10239_NAIVE_VS_DAY4.5_EFF_CD8_TCELL_DN	Sig115	FABP5	UHRF1	RAB34	SQLE	SLC25A13	SAP30	WDHD1	PGK1	PGRMC1	ARHGAP11A	CKS1B	BARD1	CDC20	ZWILCH	RANBP1	LGALS1	FARP1	SERPINB9	NUP37	ALG6	DDX39A	ZNF503	AP3S1	MBNL3	PHLDA1	EPT1	CASP3	TIPIN	EHD4	CCDC34	HNRPLL	FIGNL1	HK2	ANXA2	PMVK	ACOT7	RAN	RFC5	ATP2A2	LRP8	C13orf27	CSDA	KNTC1	SEC13	STMN1	GINS2	RFC3
GSE10239_MEMORY_VS_DAY4.5_EFF_CD8_TCELL_UP	http://www.broadinstitute.org/gsea/msigdb/cards/GSE10239_MEMORY_VS_DAY4.5_EFF_CD8_TCELL_UP	Sig116	SUGT1	CBX7	NSFL1C	ZNF335	DBNDD2	HMHA1	PLA2G16	ZFP36	CNRIP1	RPL36	FAM36A	COL9A3	YPEL3	TRAF3IP3	C6orf162	POU6F1	DDIT3	ZNF740	IL10RB	RNF167	CARD6	PARP8	KLK8	SLC17A9	KAT2A	CHD3	IGFALS	EVL	ARAP1	KCNMA1	LTB	IKBKE	RNF166	GPR18	ATG13	UBXN11	RHCG	C8orf42	U2AF1	TCN2	ZNF777	DACT2	NFE2L1	FAM103A1	PLCD1	PARP16	JUN
GSE10239_MEMORY_VS_DAY4.5_EFF_CD8_TCELL_DN	http://www.broadinstitute.org/gsea/msigdb/cards/GSE10239_MEMORY_VS_DAY4.5_EFF_CD8_TCELL_DN	Sig117	MFF	USP42	DCUN1D5	RPS2	XPO7	STRAP	PTPLAD1	MRPL39	AASDH	RFC5	RFX5	BUB1B	PPM1H	GZMB	IDH3A	SPCS3	IPO5	GARS	PGK1	YIPF5	43529	TM9SF2	ARF6	SMARCC1	MLEC	RRS1	LAMTOR3	SLC35E2B	HARS	TSTD2	SC5DL	UFSP2	STRN	KDSR	ICOS	THOC7	TRA2B	CDK1	VMA21	ACTL6A	SLC25A13	CDC16	TNFRSF9	SETD6	SAP30	DIDO1	MCM5
GSE15324_NAIVE_VS_ACTIVATED_CD8_TCELL_UP	http://www.broadinstitute.org/gsea/msigdb/cards/GSE15324_NAIVE_VS_ACTIVATED_CD8_TCELL_UP	Sig118	DAPK3	TOMM40L	43527	CHKB	UBL5	CIITA	FKBPL	KHK	ARSB	ST6GALNAC5	ITPR3	GZMK	ADAM22	CECR5	HSCB	AGAP2	ANKRD12	UNC5CL	FAHD2A	BSDC1	GABRD	C21orf62	IGLL1	ARID5B	PHKA1	CYP3A4	USF1	PCNX	LDHD	ACVR2B	LIX1	ACAD10	C20orf196	ZBTB10	COQ10A	THUMPD2	FPR3	ST3GAL1	TRAF5	ZBTB42	HMX2	DSTYK	LBP	RUSC2	SERPINF2	VAMP1	LOC100009676
GSE15324_NAIVE_VS_ACTIVATED_CD8_TCELL_DN	http://www.broadinstitute.org/gsea/msigdb/cards/GSE15324_NAIVE_VS_ACTIVATED_CD8_TCELL_DN	Sig119	TRIP10	MYH10	SDF2L1	PELO	MRPS25	MBOAT2	STEAP4	DCTPP1	PAOX	SLC25A33	TTC39B	BBS12	PIM3	P4HA2	ZNF583	C6orf225	AMZ1	MLEC	ALS2	ANKRD40	CCDC112	SH3BP2	MMP10	MAPKAPK3	PQLC2	ZNF207	CPSF2	PIM1	SHMT1	SMPDL3B	C5orf62	GCH1	SLC6A6	RAB33A	SRM	MEX3A	ACVR1	EPDR1	CPSF6	CRABP2	RAD54L2	SLC35D1	ZBED6	NEK6	ZNF473	DIP2C	CNTLN
GSE15324_NAIVE_VS_ACTIVATED_ELF4_KO_CD8_TCELL_UP	http://www.broadinstitute.org/gsea/msigdb/cards/GSE15324_NAIVE_VS_ACTIVATED_ELF4_KO_CD8_TCELL_UP	Sig120	C19orf20	EMX2OS	FRMD4A	FSD2	TRIM26	TBL1X	SAFB	MPHOSPH9	PRMT10	MAN2B2	SYT2	NPC1	ZFP3	C16orf7	MEIS3	BCDIN3D	C7orf55	FAM36A	WWP2	CLCN4	B4GALT7	LPAR6	FAM96B	MAP3K11	DPYSL4	ADAM12	CRYBB1	MECP2	RXRG	MYLPF	MAP3K2	C9	USP21	ZNFX1	CLASRP	HEXIM1	ASPSCR1	CHPT1	HAGHL	RAB11FIP4	SAA1	BACE1	HDAC11	TEN1	TOR2A	SPIC	SH3PXD2A
GSE15324_NAIVE_VS_ACTIVATED_ELF4_KO_CD8_TCELL_DN	http://www.broadinstitute.org/gsea/msigdb/cards/GSE15324_NAIVE_VS_ACTIVATED_ELF4_KO_CD8_TCELL_DN	Sig121	POLR1C	TMEM40	GNG2	ALOX5	TYMS	ALG6	METTL11B	THG1L	ALKBH2	UBE2E3	E2F6	C9orf95	PON3	NAT9	MBD5	AGPS	UBE2K	C11orf75	ALPK2	RHAG	DCUN1D3	ZCRB1	L2HGDH	NAA35	MGAT4B	MLF1IP	SLC16A3	CCDC18	FBLN5	SLAMF7	RPGR	BORA	ARL1	GPNMB	YES1	KDELC1	TNFSF14	AKR1B15	FBXO30	PPAP2C	TDRKH	POLR1E	METRNL	AKIP1	DHRS7B	LTBP3	RPA3
GSE15324_ELF4_KO_VS_WT_NAIVE_CD8_TCELL_UP	http://www.broadinstitute.org/gsea/msigdb/cards/GSE15324_ELF4_KO_VS_WT_NAIVE_CD8_TCELL_UP	Sig122	C12orf52	CTHRC1	HYAL2	RPS6KA2	TEX15	GPM6B	PDLIM7	TNFSF4	PQLC2	ZBTB39	HEXDC	GRHL1	CDCA8	NKAIN4	KIF5C	ZBTB48	C11orf91	NICN1	SPRED3	CSNK1E	UBE2C	MORN2	DIP2C	POU1F1	CNRIP1	WDFY1	UNC5CL	RNF24	TET1	DAPK2	ASPM	SRSF12	PANK1	PRICKLE3	SPATA24	TAF15	OPLAH	GPC1	AGRN	ZCCHC3	TENC1	NTF4	TMEM184A	TCEAL8	PWWP2A	PCBP3	ARSB
GSE15324_ELF4_KO_VS_WT_NAIVE_CD8_TCELL_DN	http://www.broadinstitute.org/gsea/msigdb/cards/GSE15324_ELF4_KO_VS_WT_NAIVE_CD8_TCELL_DN	Sig123	PHGDH	MUSTN1	TTC21A	PIM3	ZFHX3	ZMYM3	WNT3	ADH4	IGHG1	KCNU1	OCEL1	BAMBI	PER1	CHRNB4	SCNN1G	PKD2L2	FHIT	DNASE2B	LBX2	TUFT1	TNNT2	SHE	FOXB2	PMM2	TNFAIP3	SLC44A4	NKX2-4	MRPS11	MANSC1	LOC100128160	HOXB9	CLSTN3	HEATR7B2	CYP3A4	AATK	DNAI1	ACOXL	HHAT	SYT10	JUNB	C9orf142	SOX4	IL20RB	DDAH1	KCNK13	SYT6	FGF8
GSE15324_ELF4_KO_VS_WT_ACTIVATED_CD8_TCELL_UP	http://www.broadinstitute.org/gsea/msigdb/cards/GSE15324_ELF4_KO_VS_WT_ACTIVATED_CD8_TCELL_UP	Sig124	SSX2IP	AKR1C3	PFN2	EIF2AK4	CRBN	C9orf85	PATL2	KIF5C	FAM49B	HIPK2	KIF2A	METTL15	TTL	LOC401397	ALDH9A1	RAB9A	PIK3R2	PGS1	LONP1	BEND4	APOF	CLU	UBQLN1	CDK5RAP1	DTX1	ZNF516	FYTTD1	SDF4	FUT11	TTC9C	REPIN1	ACCN3	ARMCX1	GTF2E2	ABTB2	GLG1	CCDC47	TFPI	AGPAT4	ERI2	TBC1D9B	SEMA4C	TXNRD3	PTGER2	HLA-B	MEX3C	FKBPL
GSE15324_ELF4_KO_VS_WT_ACTIVATED_CD8_TCELL_DN	http://www.broadinstitute.org/gsea/msigdb/cards/GSE15324_ELF4_KO_VS_WT_ACTIVATED_CD8_TCELL_DN	Sig125	LRMP	FCGR3A	RNASE10	ABL1	BRD9	LSM10	TSNAXIP1	ABHD10	ATP6V1C2	PON1	ZMAT5	DDB2	LOC144486	FGL2	SH2D2A	PTEN	HIST1H1E	PHTF1	NQO2	GPR114	TMEM25	IRF2	PHYHIPL	NSMCE2	RAP1GAP2	ATOH1	PMM2	PRKAB1	RBM6	43709	ZNF124	GRM2	BTG2	SDR39U1	OPLAH	DDX28	DUSP26	GGH	ADD3	TST	HIST1H1T	EXOC3L4	CD96	GUCY2D	EIF2AK2	TRIM21	TP53I11
GSE15659_RESTING_TREG_VS_NONSUPPRESSIVE_TCELL_UP	http://www.broadinstitute.org/gsea/msigdb/cards/GSE15659_RESTING_TREG_VS_NONSUPPRESSIVE_TCELL_UP	Sig126	INHBE	LOC399884	MPV17L	WDR92	AAMP	ABT1	ACAT2	ADAMTS5	ADAMTSL1	AGRN	AGXT	ALK	ALKBH7	ALOX12	ALX1	ALX4	AMPH	ANKRD43	AP4B1	ARHGAP5	ARHGEF16	ARIH1	ARL4A	ARSE	ASB12	ASB4	ASCL3	ASF1A	ATAD3A	ATM	ATP6AP1	ATP6V0C	ATPAF1-AS1	ATRN	ATXN1L	ATXN3L	BBOX1	BBS1	BCL11A	BCL2L14	BCOR	C9orf174	BEND4	BLCAP	BOLA1	BPIFB6	BTAF1
GSE15659_RESTING_TREG_VS_NONSUPPRESSIVE_TCELL_DN	http://www.broadinstitute.org/gsea/msigdb/cards/GSE15659_RESTING_TREG_VS_NONSUPPRESSIVE_TCELL_DN	Sig127	SMC1A	APOL6	SPACA7	C9orf89	ZPBP2	ZNRF2	ZNF618	ZNF414	ZNF142	ZMIZ2	ZFC3H1	ZCCHC9	ZBED6	ZAN	YIPF2	YAP1	XAF1	WISP3	WIF1	WDR33	WDHD1	WARS	VPS35	VENTXP1	VCPIP1	UTS2D	UTP11L	UNC13D	UGT2B17	UBR5	UBL7	UBL3	UBFD1	UBE2U	UBE2J1	UBA3	U2AF1	TYK2	TTTY13	TTL	TTC7A	TTC35	TTC33	TSTA3	TRPM6	TRIP6	TRIP12
GSE15659_NONSUPPRESSIVE_TCELL_VS_ACTIVATED_TREG_UP	http://www.broadinstitute.org/gsea/msigdb/cards/GSE15659_NONSUPPRESSIVE_TCELL_VS_ACTIVATED_TREG_UP	Sig128	HEPACAM	INHBE	ABCC3	ACOT6	ACPL2	ACVR2A	ADAMTSL3	ADAT3	ADCY9	AFAP1	AGPAT6	AGXT	ALKBH7	ALPK1	ALX1	AMH	AMPD2	ANK1	ANKMY1	ANKRD43	ANKRD45	AOC4	AP4B1	ARHGAP35	ARHGAP5	ARHGEF19	ARIH1	ARL4A	ARSJ	ASB15	ASB4	ASMTL-AS1	ATPAF1-AS1	ATXN3L	AVPR1A	BBOX1	BBS1	BCS1L	C9orf174	BDNF	BEND4	BMS1P5	BOLA1	BOLA3	BPI	BTAF1	C10orf27
GSE15659_NONSUPPRESSIVE_TCELL_VS_ACTIVATED_TREG_DN	http://www.broadinstitute.org/gsea/msigdb/cards/GSE15659_NONSUPPRESSIVE_TCELL_VS_ACTIVATED_TREG_DN	Sig129	LOC692247	LOC145845	ZNRF2	ZNF861P	ZNF775	ZNF678	ZNF655	ZNF557	ZNF530	ZNF394	ZNF346	ZNF324B	ZNF287	ZNF28	ZNF277	ZNF193	ZNF131	ZMYND11	ZFC3H1	ZFAND5	ZDHHC8P1	ZCCHC9	ZCCHC13	ZC3H13	ZBED6	ZAN	YY1	YPEL5	YIF1B	XIST	WNT9B	WISP3	WDR92	WDR33	VPS28	UTS2D	UTP23	UTP11L	USP43	USP34	USP11	UG0898H09	UBL7	UBL3	UBFD1	UBE4B	UBE2U
GSE15750_WT_VS_TRAF6KO_DAY6_EFF_CD8_TCELL_UP	http://www.broadinstitute.org/gsea/msigdb/cards/GSE15750_WT_VS_TRAF6KO_DAY6_EFF_CD8_TCELL_UP	Sig130	ABHD12	GLB1	C5orf28	SLC15A2	MMP11	LAMB1	B3GALT4	ZNF394	TMEM19	PCDHB15	SIAH2	CDYL2	METAP1	DNAJC15	C10orf35	EIF5B	C2orf28	IFI35	TANC1	DDX4	AGL	DUS3L	COL4A3BP	C19orf39	SYT6	P2RY12	GPLD1	WASH1	GSTK1	ANAPC7	HVCN1	SSSCA1	CCDC130	CCDC73	TGM2	CCDC51	CAPN3	CRADD	EIF3G	CYP17A1	TSPO	C2orf76	DDHD1	NUP50	ZSWIM7	PLEKHG6	IKBKAP
GSE15750_WT_VS_TRAF6KO_DAY6_EFF_CD8_TCELL_DN	http://www.broadinstitute.org/gsea/msigdb/cards/GSE15750_WT_VS_TRAF6KO_DAY6_EFF_CD8_TCELL_DN	Sig131	PDCD4	CDH1	TWIST2	RC3H2	CCDC71	TBX4	CLIP4	CLPX	KIAA1211	CASP7	ARSI	RHOT1	NPC1L1	CPB1	DEFB119	SUZ12	FAM178A	RILPL2	PKP3	DNAH5	HMOX2	DMKN	PTP4A2	PPP1R13L	FOXL1	IL2RG	RCL1	USP49	SENP2	MED14	LMCD1	C12orf70	LRIT1	C10orf10	TCAP	CTTNBP2	NRP1	NINJ2	UBE2D1	TNS1	BANF2	XRN2	KLF11	NLRP14	COL22A1	IKZF2	TM9SF3
GSE15750_WT_VS_TRAF6KO_DAY10_EFF_CD8_TCELL_UP	http://www.broadinstitute.org/gsea/msigdb/cards/GSE15750_WT_VS_TRAF6KO_DAY10_EFF_CD8_TCELL_UP	Sig132	MESDC2	GUF1	PRKAR2A	EPPK1	AIM2	RSG1	C6orf170	CDH1	RNASEH2B	CRTAM	CENPI	REEP1	FAM101B	SLC15A2	NUP93	SETD2	THUMPD2	GYS1	RASSF3	SPTLC1	IRX3	NOA1	FAHD1	EPS8L1	GTF2A2	HCRTR2	ALDH7A1	ETV5	B3GALNT2	UBE2L6	TUFM	SFRP4	LHPP	ALS2CL	PECAM1	PARP8	MYC	HTRA4	ENTPD6	DLL4	VIPR1	COG7	MGST2	SENP8	C16orf71	PFKFB2	DSG2
GSE15750_WT_VS_TRAF6KO_DAY10_EFF_CD8_TCELL_DN	http://www.broadinstitute.org/gsea/msigdb/cards/GSE15750_WT_VS_TRAF6KO_DAY10_EFF_CD8_TCELL_DN	Sig133	CLEC2L	SPRY2	TMOD4	FUT10	NAV2	ADAM12	IFFO2	ASTL	CELSR2	C6orf221	TMEM88	LCE2B	CRABP1	GRIP2	DOC2B	KRT79	WNK4	PACRG	CORO2B	GNAT2	NEU2	MRAP2	CPNE5	SPATS2	PDC	ASPHD2	KIAA1024L	PLEKHH3	IRGQ	SNCB	PRRG4	SEMA5B	UROC1	KIAA2013	ATRNL1	YEATS4	STEAP3	SLC12A5	FBLN1	SUMF1	RAG1	MST1R	ACSL3	SLC24A4	ZNF169	DDAH2	A2M
GSE15750_DAY6_VS_DAY10_EFF_CD8_TCELL_UP	http://www.broadinstitute.org/gsea/msigdb/cards/GSE15750_DAY6_VS_DAY10_EFF_CD8_TCELL_UP	Sig134	NUSAP1	GMNN	KIF2C	RPS27L	SKA1	CEP55	PRR11	STMN1	AURKA	PIH1D2	SGOL1	TOP2A	MED7	CCDC99	CDC45	PCYT1B	NUF2	BUB1B	SENP1	DIAPH3	NCAPH	NEK2	TTK	SHCBP1	C15orf23	RACGAP1	IDH3A	KIF18B	FBXO33	AURKB	C17orf53	PGK1	GLRX	CENPW	DNA2	FAM64A	C6orf225	RAD51B	SPAG5	CTNNAL1	CKAP2	CKAP2L	CENPI	ANP32B	CASC5	RAD51	ESD
GSE15750_DAY6_VS_DAY10_EFF_CD8_TCELL_DN	http://www.broadinstitute.org/gsea/msigdb/cards/GSE15750_DAY6_VS_DAY10_EFF_CD8_TCELL_DN	Sig135	METTL22	SLC9A9	CBX7	RAB37	CPNE7	EPPK1	BRF1	NMNAT3	OTUD1	C10orf137	LRIG2	C12orf53	DDB2	GUF1	PRSS12	IL7R	SEC16A	APOBR	CLCN6	FOXJ2	GSDMD	INPP5B	PRKCE	BBS2	TEF	SLC26A11	LPIN1	MGRN1	SLC20A1	JMY	MICALL1	DMRTA1	PLEKHM3	PGS1	PRKCA	FAM54B	CYP17A1	SBSN	FARP2	SIPA1L3	ZDHHC3	C19orf48	MAP3K14	KIAA0947	CYP2E1	FAM120AOS	ZNF76
GSE15750_DAY6_VS_DAY10_TRAF6KO_EFF_CD8_TCELL_UP	http://www.broadinstitute.org/gsea/msigdb/cards/GSE15750_DAY6_VS_DAY10_TRAF6KO_EFF_CD8_TCELL_UP	Sig136	SKA3	SKA1	FOXM1	MELK	SPC24	UBE2N	KIF4A	MXD3	NEK2	C17orf53	TACC3	PLK1	TTK	EXO1	SPC25	TUBA1B	FANCD2	TPX2	CCNA2	CCDC138	BUB1B	CDC45	CASC5	CCNB2	TOP2A	PSRC1	ZWILCH	CHEK1	CENPP	CENPI	CA5B	RNASEH2B	MLF1	NCAPG	MUC20	RRM2	CDCA3	CDKN3	KIF23	RAD51AP1	STIL	MND1	MKI67	KIF20B	SMC2	EZR	BIRC5
GSE15750_DAY6_VS_DAY10_TRAF6KO_EFF_CD8_TCELL_DN	http://www.broadinstitute.org/gsea/msigdb/cards/GSE15750_DAY6_VS_DAY10_TRAF6KO_EFF_CD8_TCELL_DN	Sig137	SLC20A1	IL7R	POGK	DMRTA1	BCL2	DBP	FCGR2B	SHPK	CLK1	FAM54B	TAGAP	CARD6	SFI1	MLL3	MYLIP	PDE2A	BTBD11	S100PBP	TNFRSF18	QPRT	EIF4A2	SCML4	PISD	ELMOD3	PIK3IP1	CCDC137	PRKCE	C8orf42	TTC39B	GCFC1	PLEKHA6	SPRY2	AMIGO1	C9orf50	MAFK	METTL3	CCL4	CBX7	CDYL2	KCNJ8	TUFM	IL18RAP	NR1D2	ZNF318	TAZ	EHD3	FAM84B
GSE15930_NAIVE_VS_24H_IN_VITRO_STIM_CD8_TCELL_UP	http://www.broadinstitute.org/gsea/msigdb/cards/GSE15930_NAIVE_VS_24H_IN_VITRO_STIM_CD8_TCELL_UP	Sig138	WNT7B	FGD3	FAM134A	CD79B	MEST	SQRDL	TIMP2	SEC11C	TCN2	PRCC	EIF2AK2	IL3RA	NCOA3	HEATR7A	MX1	WBP1	PAPSS2	CCDC152	HCFC1R1	SPPL2B	CD1D	PKD1	RPL12	TCF20	GPR97	COL6A2	CTNNAL1	LHCGR	POMC	ELMOD3	SEMA4F	SURF4	MAP1LC3A	CYTH3	PI4K2A	TRAFD1	NEDD4L	HOXA3	NAGA	TFPI2	NECAP1	LALBA	MCOLN2	MYL6	RBM4B	CNTRL	DIAPH1
GSE15930_NAIVE_VS_24H_IN_VITRO_STIM_CD8_TCELL_DN	http://www.broadinstitute.org/gsea/msigdb/cards/GSE15930_NAIVE_VS_24H_IN_VITRO_STIM_CD8_TCELL_DN	Sig139	MINA	RCC1	RCN2	CENPK	XCL1	TIMM9	ARL2	PREP	NBN	CYB5B	WDR43	GSG2	POMP	ZDHHC16	CHERP	INO80E	ACOT7	PDS5B	PSMD12	CRTAP	CTPS	LGALS3	HRAS	PGAM1	TGDS	ENOPH1	RBPJ	IFI30	MRPL17	TNF	JMJD6	CD200	HK2	RAD50	CCRN4L	MRPS22	C14orf126	SYNGR2	NDUFAF4	TRIM37	TAMM41	GFM1	BIRC5	MRTO4	LOC100506562	CARM1	RPL7L1
GSE15930_NAIVE_VS_24H_IN_VITRO_STIM_IL12_CD8_TCELL_UP	http://www.broadinstitute.org/gsea/msigdb/cards/GSE15930_NAIVE_VS_24H_IN_VITRO_STIM_IL12_CD8_TCELL_UP	Sig140	WNT7B	FAM134A	CD79B	FGD3	SEC11C	NCOA3	IL3RA	TIMP2	COL6A2	RPL12	EIF2AK2	WBP1	TCN2	SQRDL	MX1	CD1D	CYTH3	MCOLN2	HCFC1R1	ELMOD3	PRCC	GPR97	LHCGR	CTNNAL1	PKD1	HEATR7A	CCDC152	EXOC7	MYL6	NEDD4L	NECAP1	LALBA	RPL37A	PI4K2A	SURF4	INSM1	TRAFD1	TCF20	POMC	MAP1LC3A	SCEL	PCSK7	SIAH1	RBM4B	CNTRL	UNC119	TRAF2
GSE15930_NAIVE_VS_24H_IN_VITRO_STIM_IL12_CD8_TCELL_DN	http://www.broadinstitute.org/gsea/msigdb/cards/GSE15930_NAIVE_VS_24H_IN_VITRO_STIM_IL12_CD8_TCELL_DN	Sig141	RCC1	MINA	XCL1	CENPK	MEST	ARL2	PREP	TIMM9	RCN2	NBN	POMP	CYB5B	LGALS3	WDR43	CHERP	RBPJ	ZDHHC16	INO80E	ACOT7	HRAS	CTPS	CRTAP	IFI30	GADD45G	ENOPH1	TGDS	JMJD6	GSG2	HK2	PSMD12	RAD50	PGAM1	CCRN4L	SYNGR2	MRPL17	PDS5B	CD200	CARM1	NDUFAF4	MRPS22	MRTO4	PLP2	MSMO1	BIRC5	TAMM41	POLR1A	TRIM37
GSE15930_NAIVE_VS_24H_IN_VITRO_STIM_INFAB_CD8_TCELL_UP	http://www.broadinstitute.org/gsea/msigdb/cards/GSE15930_NAIVE_VS_24H_IN_VITRO_STIM_INFAB_CD8_TCELL_UP	Sig142	FGD3	FAM134A	PRCC	SQRDL	CD79B	TIMP2	SEC11C	NCOA3	LALBA	RPL12	IL3RA	HEATR7A	HCFC1R1	TCN2	GPR97	PKD1	CD1D	COL6A2	ELMOD3	WBP1	SEMA4F	PRDM5	MCOLN2	CTNNAL1	SPPL2B	SURF4	POMC	INSM1	MYL6	LHCGR	PAPSS2	MAP1LC3A	RBM4B	CCDC152	NEDD4L	NECAP1	CYTH3	NAGA	UNC119	RCVRN	EXOC7	SLFN12	ATP9A	TCF20	HOXA3	PCSK7	MX1
GSE15930_NAIVE_VS_24H_IN_VITRO_STIM_INFAB_CD8_TCELL_DN	http://www.broadinstitute.org/gsea/msigdb/cards/GSE15930_NAIVE_VS_24H_IN_VITRO_STIM_INFAB_CD8_TCELL_DN	Sig143	MINA	RCC1	XCL1	CENPK	ARL2	TIMM9	PREP	RCN2	NBN	WDR43	CYB5B	EIF2AK2	CHERP	POMP	GSG2	ZDHHC16	ACOT7	INO80E	CTPS	TGDS	PDS5B	CRTAP	ENOPH1	HRAS	IFI30	PSMD12	JMJD6	RAD50	PGAM1	SYNGR2	HK2	RBPJ	MEST	MRPL17	CCRN4L	MRPS22	TNF	GFM1	MRTO4	CD200	TAMM41	CARM1	POLR1A	NDUFAF4	MSMO1	TRIM37	BIRC5
GSE15930_NAIVE_VS_48H_IN_VITRO_STIM_CD8_TCELL_UP	http://www.broadinstitute.org/gsea/msigdb/cards/GSE15930_NAIVE_VS_48H_IN_VITRO_STIM_CD8_TCELL_UP	Sig144	LPHN1	SLCO3A1	DTX1	KIT	PLEKHA5	JARID2	ABCA1	SH3GL1	GREM2	EFNB2	NR1D2	IL27RA	NAP1L2	TPT1	CNGA2	CWC22	MSL2	TNNC2	RAB33B	SLC12A7	GABBR1	CNTN3	RPS6KA2	FRAT1	GALNT10	DKK3	COL14A1	LOC100506612	BCL3	KLF2	GRIK1	STAT5A	PHC1	USP18	SIAH1	ZNF125	TANC1	NEDD4L	BPIFA2	NQO1	KCNQ1	POLG2	GCET2	MAP4K3	CLCN7	SLC7A11	ABCC5
GSE15930_NAIVE_VS_48H_IN_VITRO_STIM_CD8_TCELL_DN	http://www.broadinstitute.org/gsea/msigdb/cards/GSE15930_NAIVE_VS_48H_IN_VITRO_STIM_CD8_TCELL_DN	Sig145	NUP62	LITAF	PRDX2	ATPIF1	TMEM208	PRELID1	STOML2	CCNF	PRC1	NOP16	ECT2	FAM98A	NDUFA8	HSPD1	GSPT1	MRPL35	GPN2	PGRMC1	AHCY	COPS7A	LRRC59	KPNA2	ETF1	EIF3B	PDCL3	UBE2M	EIF2B1	ACP1	TOPBP1	METAP1	NANS	PSMD7	BSG	EIF2B5	ALDOA	SEC23B	DPP3	DTL	ARL5A	CDC6	GART	MRPL11	GARS	SS18L2	H2AFX	PGK1	DRG1
GSE15930_NAIVE_VS_48H_IN_VITRO_STIM_IL12_CD8_TCELL_UP	http://www.broadinstitute.org/gsea/msigdb/cards/GSE15930_NAIVE_VS_48H_IN_VITRO_STIM_IL12_CD8_TCELL_UP	Sig146	ZYG11B	RAE1	RFX2	SLCO3A1	ARID3B	PCDHA10	DIAPH1	NR1D2	SH3GL1	LIPA	RAB33B	CWC22	RPL12	PHF1	BLOC1S1	RCVRN	SIAH1	GUCY2D	LPHN1	DAO	BSDC1	PSAP	FLT3LG	PI4K2A	EEF1A2	HINT2	ZNF292	NEDD4L	PEA15	GCG	MBTD1	TBC1D20	B4GALT1	MFGE8	DVL1	KLHL21	ITGB3	MAP1LC3A	KIAA0319L	FAM134A	PIP5K1A	ABCD1	USP25	RGS3	QSOX1	BRWD3	AKAP2
GSE15930_NAIVE_VS_48H_IN_VITRO_STIM_IL12_CD8_TCELL_DN	http://www.broadinstitute.org/gsea/msigdb/cards/GSE15930_NAIVE_VS_48H_IN_VITRO_STIM_IL12_CD8_TCELL_DN	Sig147	NUP62	FARSA	HOPX	WDR61	TARS	C16orf80	TMEM223	MRPL44	PRDX4	GPD2	RRM1	COQ7	BCAT1	C14orf1	IFRD2	DDX1	LMAN1	CDC7	CUL2	SLC30A4	BSG	PSMD1	KPNA3	GK	PGM1	APBA3	MESDC2	MCM7	PPPDE2	GPN2	LIG1	UQCR11	HMGCR	GABARAPL1	POLR2I	EXOSC7	DTL	DPY30	NUP93	ALAS1	UBE2M	HDLBP	PRDX2	NCBP2	GCSH	MARCKSL1	MRPL36
GSE15930_NAIVE_VS_48H_IN_VITRO_STIM_IFNAB_CD8_TCELL_UP	http://www.broadinstitute.org/gsea/msigdb/cards/GSE15930_NAIVE_VS_48H_IN_VITRO_STIM_IFNAB_CD8_TCELL_UP	Sig148	PSAP	MAP4K3	HINT2	KIF3C	APP	F2RL1	SEMA4A	ST3GAL1	BMP6	RPS6KA2	FRMD8	ZYG11B	COQ10A	MKNK1	KIT	DCT	TGFB3	VIPR1	KRT1	SH3BP1	ADRB2	SH3GL1	SYNRG	HNF1A	STAT5A	SGPL1	AP1B1	NQO1	NOTCH3	KIAA0319L	STK24	MAP7	MAP1LC3A	TANC1	PAK4	ZFHX3	CLPS	PEA15	ERCC2	ING4	MCOLN2	RFX2	PHRF1	MATK	MFGE8	SUMO2P7	POLG2
GSE15930_NAIVE_VS_48H_IN_VITRO_STIM_IFNAB_CD8_TCELL_DN	http://www.broadinstitute.org/gsea/msigdb/cards/GSE15930_NAIVE_VS_48H_IN_VITRO_STIM_IFNAB_CD8_TCELL_DN	Sig149	SF3A1	UGDH	DRG1	RUVBL2	HCFC1	FUBP1	WDR61	ATPIF1	NDUFS5	ANKRD40	HMGN5	MARCKSL1	CENPC1	PSMC1	SLC25A17	CLPP	FARSA	ARL5A	CCNC	C16orf80	FDX1	BCAT1	RPRD1B	MRPL44	MRPS2	UNC119B	LMAN1	VCL	GABARAPL1	ZNHIT1	SQLE	RSPH3	PGM1	YARS	PITPNB	METAP1	NDUFA8	C6orf125	BSG	MRPL12	CLCN3	ELOF1	PCK2	SS18L2	PRDX2	HMGCR	C17orf48
GSE15930_NAIVE_VS_72H_IN_VITRO_STIM_CD8_TCELL_UP	http://www.broadinstitute.org/gsea/msigdb/cards/GSE15930_NAIVE_VS_72H_IN_VITRO_STIM_CD8_TCELL_UP	Sig150	FGD3	PRCC	SPPL2B	NCOA3	DUSP12	SUB1	WDR43	RPL12	GPR97	MX1	UBE2E3	KLHL21	ZNF259	NECAP1	FAM134A	RPL37A	CTNNAL1	ERCC2	LALBA	INSM1	NEDD4L	TIMP2	TRAF2	PI4K2A	PKD1	CLTB	HES2	LHCGR	CCDC152	BMP2K	PAPSS2	PGK2	RBM4B	TNF	ZDHHC5	AKAP7	RAB17	MYL6	COL6A2	ADRB2	SLFN12	HGF	TCF20	JMJD6	RCVRN	DLX1	RRP9
GSE15930_NAIVE_VS_72H_IN_VITRO_STIM_CD8_TCELL_DN	http://www.broadinstitute.org/gsea/msigdb/cards/GSE15930_NAIVE_VS_72H_IN_VITRO_STIM_CD8_TCELL_DN	Sig151	IL3RA	PREP	LGALS3	CENPK	PDS5B	MINA	CMPK2	MSMO1	ACOT7	ELMOD3	ZDHHC16	RNH1	ANXA2	LXN	PLP2	POMP	XCL1	RNF14	BIRC5	DHCR7	TGDS	GSG2	RAD50	DECR1	C14orf126	RCN2	IFI30	PGAM1	CRTAP	GLRX	MCOLN2	RBPJ	TACC3	BLMH	S100A6	CSNK2A2	GZMB	FDFT1	CD200	CKAP5	MKI67	NBN	ACOT8	DDX52	DCK	BRCA1	FDPS
GSE15930_NAIVE_VS_72H_IN_VITRO_STIM_IL12_CD8_TCELL_UP	http://www.broadinstitute.org/gsea/msigdb/cards/GSE15930_NAIVE_VS_72H_IN_VITRO_STIM_IL12_CD8_TCELL_UP	Sig152	SPPL2B	WNT7B	CD79B	WDR43	NCOA3	FAM134A	FGD3	RPL12	TIMP2	MX1	ERCC2	PI4K2A	PKD1	CCDC152	UBE2E3	DUSP12	RECQL	KLHL21	CD1D	RPL37A	EIF2AK2	PRCC	INSM1	CTNNAL1	HGF	PCSK7	SH2B3	TCF20	NEDD4L	SIAH1	LALBA	RBM4B	SEC11C	GBF1	NDUFAF4	AKAP7	COL6A2	USP21	CLTB	LHCGR	METTL1	HYOU1	ATP9A	SUB1	SKIV2L2	ZKSCAN1	DDX24
GSE15930_NAIVE_VS_72H_IN_VITRO_STIM_IL12_CD8_TCELL_DN	http://www.broadinstitute.org/gsea/msigdb/cards/GSE15930_NAIVE_VS_72H_IN_VITRO_STIM_IL12_CD8_TCELL_DN	Sig153	MEST	PREP	ARL2	LGALS3	RBPJ	RNH1	JMJD6	CENPK	XCL1	PGAM1	ANXA2	ACOT7	LXN	MSMO1	CCR5	MINA	GADD45G	HK2	PLP2	TGDS	ELMOD3	CRTAP	IL3RA	DHCR7	ZDHHC16	RNF14	MT2A	GZMB	C14orf126	RAD50	POMP	FAM162A	TPI1	SLC37A4	S100A6	SMPD1	GALK1	PAFAH1B3	CYB5B	DECR1	FDFT1	CCRN4L	NBN	FDPS	CARS	AGL	PTGR1
GSE15930_NAIVE_VS_72H_IN_VITRO_STIM_IFNAB_CD8_TCELL_UP	http://www.broadinstitute.org/gsea/msigdb/cards/GSE15930_NAIVE_VS_72H_IN_VITRO_STIM_IFNAB_CD8_TCELL_UP	Sig154	MEST	FGD3	SPPL2B	CD79B	SUB1	KLHL21	TIMP2	NCOA3	FAM134A	UBE2E3	GPR97	LALBA	NECAP1	TCF20	PRCC	COL6A2	DUSP12	INSM1	CLTB	CTNNAL1	NEDD4L	PKD1	CCDC152	SEC11C	POMC	RPL37A	PCSK7	HES2	PAPSS2	SIAH1	CD1D	DFFA	SH2B3	FAM54B	LHCGR	RBM4B	ERCC2	TCEA2	WBP1	TNF	AKAP7	AKIRIN1	ARID3B	MYL6	STK40	ACTR1B	NEURL4
GSE15930_NAIVE_VS_72H_IN_VITRO_STIM_IFNAB_CD8_TCELL_DN	http://www.broadinstitute.org/gsea/msigdb/cards/GSE15930_NAIVE_VS_72H_IN_VITRO_STIM_IFNAB_CD8_TCELL_DN	Sig155	CMPK2	CENPK	PDS5B	PREP	LGALS3	EIF2AK2	ARL2	XCL1	NBN	RAD50	MINA	ZDHHC16	ACOT7	MSMO1	RBPJ	PGAM1	ANXA2	LXN	TGDS	GSG2	RNH1	PLP2	JMJD6	HK2	C14orf126	DHCR7	GZMB	CYB5B	DECR1	TIMM9	RNF14	ELMOD3	TPI1	RCN2	IFI30	POMP	BIRC5	BRCA1	FAM162A	CD200	MT2A	MRPS22	CSNK2A2	SLC37A4	CKAP5	PSMD12	IL3RA
GSE15930_NAIVE_VS_72H_IN_VITRO_STIM_TRICHOSTATINA_CD8_TCELL_UP	http://www.broadinstitute.org/gsea/msigdb/cards/GSE15930_NAIVE_VS_72H_IN_VITRO_STIM_TRICHOSTATINA_CD8_TCELL_UP	Sig156	FGD3	FAM134A	WNT7B	NCOA3	RPL12	ACOT8	TIMP2	MX1	THAP7	CD79B	UBXN6	RPL37A	EIF2AK2	PAPSS2	POMC	GPR97	NECAP1	ZNF259	KLHL21	RBM4B	ZKSCAN1	CD1D	PKD1	NR2C1	RECK	TRAF2	TRAFD1	ST3GAL1	CNTRL	CCDC94	SIAH1	AZI2	MCOLN2	EXOC7	PCSK7	CFH	TCN2	RECQL	RAE1	DVL1	F3	FAM54B	HCFC1R1	BTC	CLTB	NEDD4L	ABCG1
GSE15930_NAIVE_VS_72H_IN_VITRO_STIM_TRICHOSTATINA_CD8_TCELL_DN	http://www.broadinstitute.org/gsea/msigdb/cards/GSE15930_NAIVE_VS_72H_IN_VITRO_STIM_TRICHOSTATINA_CD8_TCELL_DN	Sig157	XCL1	MEST	CENPK	PREP	ARL2	GADD45G	ACOT7	IFI30	POMP	LGALS3	PTGR1	RCN2	CHERP	ZDHHC16	RCC1	TIMM9	RBPJ	MSMO1	CCR5	PGAM1	TGDS	C8orf37	CRTAP	PLP2	GZMB	CDKN2AIPNL	IFT27	DHCR7	UNC119	INO80E	TAF11	BIRC5	GLRX	MCM2	TNF	HK2	GSG2	RNF14	SYNGR2	TAMM41	PSMD12	BLMH	RAD50	IL3RA	CCRN4L	SIVA1	DCTPP1
GSE16522_MEMORY_VS_NAIVE_CD8_TCELL_UP	http://www.broadinstitute.org/gsea/msigdb/cards/GSE16522_MEMORY_VS_NAIVE_CD8_TCELL_UP	Sig158	RHOC	OFD1	MLF1	RNF14	COG5	DNAJC18	SIDT1	ACTR3	ILK	SMARCD2	DNAJC12	GTF2A2	PDCL	LXN	C6orf35	COTL1	TRPV2	TMEM9B	TBRG1	RASGRP1	ENTPD1	NDUFA13	ASL	CHPT1	MTMR1	NDUFB5	COQ9	C16orf42	S100A6	GNPTG	UFL1	TMEM14A	C2orf56	MAP2K5	NDUFA7	CREB3L1	PCYT2	NDUFB3	EHBP1L1	C11orf54	CD200R1L	TRAPPC2P1	RAB32	CTSD	PHF8	GGH	DSEL
GSE16522_MEMORY_VS_NAIVE_CD8_TCELL_DN	http://www.broadinstitute.org/gsea/msigdb/cards/GSE16522_MEMORY_VS_NAIVE_CD8_TCELL_DN	Sig159	PTPRK	S100A5	IL1A	CNR1	CD160	CDYL2	MAP3K5	SLTM	ZMPSTE24	RAD9B	FAM196A	LRCH1	MEIS3	ADAM10	RBBP7	PSPH	ETV6	RALGDS	GARNL3	ZMYM1	EML5	ASXL1	DHX34	PDCD2	NCKIPSD	NCF1	IL1R2	PPP1CB	SPHK1	SNX11	OR7C1	KRTAP7-1	FADS6	C2orf29	PDZK1IP1	BCL9	DSP	F3	VPS54	ZDHHC23	SMG5	ADH4	PTPN14	ADAT2	DNAH17	IL10	KIAA0513
GSE16522_MEMORY_VS_NAIVE_ANTI_CD3CD28_STIM_CD8_TCELL_UP	http://www.broadinstitute.org/gsea/msigdb/cards/GSE16522_MEMORY_VS_NAIVE_ANTI_CD3CD28_STIM_CD8_TCELL_UP	Sig160	PBX3	OSBPL5	GLUD1	SLC25A16	EPAS1	FZD6	MUDENG	SEPN1	FUNDC1	SLC16A6	RNASEL	TRMT2B	HS3ST3B1	OSTBETA	OCRL	ASNSD1	SLC9A9	MICU1	RHOB	KIF16B	LAMB3	SMOX	KLHL30	AREG	AGPAT2	CHIC2	ITFG1	HECTD3	TMEM171	ACD	TGDS	KLRG1	KIAA0528	PEX2	ZFP64	RBMS2	GIMAP8	CD37	TNRC6C	BMPR1A	ACTG1	EBAG9	SUMF1	KCTD14	ADAP1	MAP4K5	SCOC
GSE16522_MEMORY_VS_NAIVE_ANTI_CD3CD28_STIM_CD8_TCELL_DN	http://www.broadinstitute.org/gsea/msigdb/cards/GSE16522_MEMORY_VS_NAIVE_ANTI_CD3CD28_STIM_CD8_TCELL_DN	Sig161	UTP3	ITGB7	EGLN3	ZDHHC22	CPSF3L	OAS1	NRGN	TREML2	GSTT2	PRDX1	PTGFRN	CD200	AGPAT3	IRGM	TNFRSF18	TLCD1	VPRBP	CD8A	PLK2	C5orf34	GNB5	VSTM4	PLCG1	CTSS	GPRASP2	IDH2	HSPB11	MAP4K1	CNN3	HNRNPA1	EIF3C	ABCA3	IL18BP	SLAMF1	CXXC5	CD247	GBP2	CHCHD10	PDZK1IP1	SLC29A1	BMS1	SF3A3	OAF	COL22A1	TRIB2	CCND2	SMPDL3A
GSE16522_ANTI_CD3CD28_STIM_VS_UNSTIM_MEMORY_CD8_TCELL_UP	http://www.broadinstitute.org/gsea/msigdb/cards/GSE16522_ANTI_CD3CD28_STIM_VS_UNSTIM_MEMORY_CD8_TCELL_UP	Sig162	TBL1X	SRGAP3	KSR1	MPP6	NDST2	WAPAL	ENC1	PLCXD2	WFS1	PQLC1	STAT5B	ALOX12	LSM1	TXNL1	PHF10	CGNL1	JAK2	CLCF1	ADAT2	RC3H1	SCN1B	COG2	IL10	BFSP1	CASS4	ADH4	STK38L	ZNF655	FAM107B	ZNF286A	PSMC6	SPHK1	KDM1A	PSMD5	CDK5R1	ATF7	NFIX	GMPS	UBE3C	SLC25A25	PDCD2	UTP14A	PPP2R3A	SPTB	GLS2	RPN1	HNRPLL
GSE16522_ANTI_CD3CD28_STIM_VS_UNSTIM_MEMORY_CD8_TCELL_DN	http://www.broadinstitute.org/gsea/msigdb/cards/GSE16522_ANTI_CD3CD28_STIM_VS_UNSTIM_MEMORY_CD8_TCELL_DN	Sig163	PINK1	SDCCAG8	PRKACA	TMEM8A	RAB3D	DGCR6	SEC11C	VAMP3	N4BP2L1	SMARCD2	CRADD	CA5B	TMEM14A	PHYH	HYI	DTD1	MTMR1	UBAC1	PRR13	SDHB	FBXO4	PXK	FLYWCH1	CUL3	ARL2BP	GAB3	NDUFB7	SSH3	BIVM	GOLGA1	CHID1	LSM5	NDUFA13	PURA	IDS	FAM108A1	CD37	GDPD1	CTSS	TTC32	ANKRD44	SENP7	SH3BP1	FNTA	FAM165B	GBP7	LRPAP1
GSE16522_ANTI_CD3CD28_STIM_VS_UNSTIM_NAIVE_CD8_TCELL_UP	http://www.broadinstitute.org/gsea/msigdb/cards/GSE16522_ANTI_CD3CD28_STIM_VS_UNSTIM_NAIVE_CD8_TCELL_UP	Sig164	TLR2	CDKN1B	SPATS2L	VSTM4	NARS	ZNF296	CRLF2	DNAJC7	CFP	MID1IP1	HAX1	ARHGAP35	INHBA	ERAS	COPS2	NIP7	CXCL16	ATXN3	SLU7	MYO9A	UBE2G1	BCAT1	NUP43	KLHDC3	SPRYD4	COQ10B	TMEM57	SAG	SNAPC2	PURB	IDO1	ATP1B1	GOT1	CHRNE	INSIG1	PAPD4	RNF4	PLK2	NHEJ1	WDR61	ZWINT	CTPS	FGB	NFE2	C4orf17	HAGH	SLC15A1
GSE16522_ANTI_CD3CD28_STIM_VS_UNSTIM_NAIVE_CD8_TCELL_DN	http://www.broadinstitute.org/gsea/msigdb/cards/GSE16522_ANTI_CD3CD28_STIM_VS_UNSTIM_NAIVE_CD8_TCELL_DN	Sig165	CSK	AKAP14	MRI1	C1orf21	CC2D2A	TAP2	CSNK1G2	KIAA0528	BCL2L11	PTPN9	FGFR1OP2	CFL1	HECTD3	PDIA4	MUDENG	DCK	NSF	HSD17B4	CHRNA5	LIMK1	VPS37B	RASIP1	RASAL3	EIF2AK3	FAM108A1	GPM6A	ABHD8	NDRG2	GEN1	CBX5	TRAPPC9	PPP3CA	LY6E	FKBP3	ATAD2	TCTA	USP18	KCNAB2	IL10RA	GPN2	GALNT2	SMAP2	STAG1	BANP	SPTBN1	SCAPER	RPGR
GSE19825_NAIVE_VS_IL2RALOW_DAY3_EFF_CD8_TCELL_UP	http://www.broadinstitute.org/gsea/msigdb/cards/GSE19825_NAIVE_VS_IL2RALOW_DAY3_EFF_CD8_TCELL_UP	Sig166	ATP13A5	PLAG1	C1orf190	PCLO	GRIN2B	SLC26A11	IGF2BP1	CACNG6	BPIFA2	INTU	SOX7	EPOR	ATP7B	ZNF536	CLDN4	PRKCG	HOOK3	FBLN1	ADAM28	TET3	BCAR3	BPIFB2	CELF3	HRC	C16orf86	WEE2	UROC1	RPL37	ADAMTS9	KRT2	SPARCL1	EDAR	VSX2	ZEB2	C5orf13	ANGPTL7	TRAT1	XPNPEP2	CHRM1	CPNE6	FERMT2	PAPSS2	ARHGEF40	C15orf27	TUBB4A	EHD2	LCE2B
GSE19825_NAIVE_VS_IL2RALOW_DAY3_EFF_CD8_TCELL_DN	http://www.broadinstitute.org/gsea/msigdb/cards/GSE19825_NAIVE_VS_IL2RALOW_DAY3_EFF_CD8_TCELL_DN	Sig167	CD84	AMMECR1	CLCC1	LSM6	BET1L	SDC3	CC2D1A	STYX	MTERFD3	DENND1B	SREK1	C3orf19	REXO1	FAM36A	C16orf70	P4HTM	MAPK11	RALGAPB	GLRX2	FAS	LPCAT1	DGCR14	SRF	C9orf95	FAM20B	AP4B1	MYLPF	CWF19L1	ING3	PRKRA	PYROXD1	GRK6	DROSHA	DDX18	FAM63B	ILK	SCRIB	TJP3	SLC39A10	KIAA0564	LPP-AS2	CLN6	FRRS1	GTF3C6	SEC61G	DBT	XAF1
GSE19825_NAIVE_VS_IL2RAHIGH_DAY3_EFF_CD8_TCELL_UP	http://www.broadinstitute.org/gsea/msigdb/cards/GSE19825_NAIVE_VS_IL2RAHIGH_DAY3_EFF_CD8_TCELL_UP	Sig168	LEP	TRIM2	OR51B4	EDAR	SNED1	TUBB4A	PRMT8	COL6A1	ZNF536	NPY	C16orf86	ANGPTL1	KERA	MS4A15	SLC29A4	RARB	TACR2	ATP7B	AKAP6	OR5P3	EGFLAM	HIST2H3C	SLC10A1	CELF3	PRKAA2	FAM123B	KRTAP17-1	ZBTB5	SERPINA3	FOXA2	TSPAN7	DNAJC17	NIPAL2	LYPD4	ADAM28	UPP2	CLDN4	AGXT	DENND5B	NAPSA	ZFX	RPL18	PCDHB7	TIMP3	CORO2B	PTPRM	C1orf105
GSE19825_NAIVE_VS_IL2RAHIGH_DAY3_EFF_CD8_TCELL_DN	http://www.broadinstitute.org/gsea/msigdb/cards/GSE19825_NAIVE_VS_IL2RAHIGH_DAY3_EFF_CD8_TCELL_DN	Sig169	TGFB1	CYB5R1	C6orf136	DENND1B	SF1	CLPTM1	REXO1	HAUS3	CHST12	PLEKHF1	G0S2	PSMD11	MRPL42	MAN1C1	RIF1	TRNAU1AP	UBXN8	SNX19	TNFSF14	SREBF2	MTA2	SLC4A7	ENTPD1	VAC14	MOSPD3	C22orf32	NAA15	NUP214	PMS1	ADRBK1	BRF2	MGAT4B	NAPEPLD	ATP13A2	C3orf19	ALAS1	CHADL	SCLY	SND1	AP1S1	GADD45GIP1	INF2	GTF2IRD2	TDP2	FAM82B	SF3A1	GALT
GSE19825_CD24LOW_VS_IL2RA_HIGH_DAY3_EFF_CD8_TCELL_UP	http://www.broadinstitute.org/gsea/msigdb/cards/GSE19825_CD24LOW_VS_IL2RA_HIGH_DAY3_EFF_CD8_TCELL_UP	Sig170	GRAMD3	PKD1	GMIP	ERMP1	CIZ1	HSD17B8	CLCN7	KLF13	ZNF579	RNPEPL1	LY86	PRKCB	WDR45	RGS2	CCND1	RABEP2	MFAP3	CHFR	PARP8	NCKAP5L	FMNL2	TRIO	MEF2D	GPR171	CCDC12	FOXO4	PKIB	CORO7	CERK	LAPTM4B	ZNF394	GIMAP4	SSH1	WBSCR27	TXLNG	KIAA0415	PEA15	ARHGEF4	ZYX	C11orf67	SUSD1	LAG3	CABLES1	AR	SLA2	EPS8L1	TBC1D8
GSE19825_CD24LOW_VS_IL2RA_HIGH_DAY3_EFF_CD8_TCELL_DN	http://www.broadinstitute.org/gsea/msigdb/cards/GSE19825_CD24LOW_VS_IL2RA_HIGH_DAY3_EFF_CD8_TCELL_DN	Sig171	SMCR7	PPA1	RCL1	SUZ12	DNAJC6	GCAT	GPSM2	PTPLB	RBBP7	RAD51AP1	CRMP1	NARS	WDR12	NUP62	MRPL11	DIS3	PRDX3	COL6A3	CDK4	BOLA3	NSL1	AGPAT5	CCND3	PPIF	NR2C1	SEC61A2	SF3A3	PFKL	STOM	TIAM1	MAN1C1	PSME3	STRAP	FANCA	CDK12	IPO9	IL1R2	NUP107	C17orf101	H6PD	MTSS1	ADAT2	NDFIP1	LIG3	IWS1	ATP6V1C1	NUP155
GSE19825_NAIVE_VS_DAY3_EFF_CD8_TCELL_UP	http://www.broadinstitute.org/gsea/msigdb/cards/GSE19825_NAIVE_VS_DAY3_EFF_CD8_TCELL_UP	Sig172	KRT75	C2orf81	TMEM151A	SLC12A8	TTLL10	H2AFY2	GAS1	LEPR	KCNA2	REM2	PTPRN	PCDHB7	MYH6	BDKRB1	GPR97	SLC35F1	TCEA2	FLT4	EPCAM	KIAA1211	FOXA2	C1QL1	ZFX	ADARB1	ZNF536	UROC1	CSDC2	ZNF420	ARHGEF40	C16orf86	KBTBD13	DPYSL4	CPNE6	APLP2	ANGPT4	CCDC22	TSPAN7	GPR12	FCGR2B	NPY	TRPA1	SPATS1	GPR182	CYFIP1	HDAC11	FAM90A13	SV2B
GSE19825_NAIVE_VS_DAY3_EFF_CD8_TCELL_DN	http://www.broadinstitute.org/gsea/msigdb/cards/GSE19825_NAIVE_VS_DAY3_EFF_CD8_TCELL_DN	Sig173	PGM2	SLC30A7	MSL3	TH1L	NUDT16L1	ANXA2	CHMP6	KIAA1310	C17orf48	MYO1G	VIM	PRDX2	WRAP53	NDUFA8	PYCARD	C1orf122	ACP1	RIPK3	PSMC3	DUS3L	VTI1B	WBSCR22	C12orf10	NDUFA11	NUDT21	PSMG3	BID	PRADC1	CD48	ADPRH	C16orf58	CASP3	DCPS	SNRNP25	HIP1	LGALS1	NDC80	STMN1	NSDHL	NDUFAF3	GZMA	C6orf120	STUB1	EIF4EBP2	BCL2L12	RTCD1	ANXA6
GSE22886_NAIVE_CD8_TCELL_VS_MEMORY_TCELL_UP	http://www.broadinstitute.org/gsea/msigdb/cards/GSE22886_NAIVE_CD8_TCELL_VS_MEMORY_TCELL_UP	Sig174	HAUS2	PARP16	ZBTB32	IP6K1	LARS	PGF	GPR182	PRF1	SPATA7	CD8B	HOXB9	CORT	CYP3A4	KIAA0894	MPHOSPH9	KIAA1659	FAM114A2	CEP250	HIST1H4C	POLM	GOLGA8H	ATP8B1	KLRC3	TCF7L2	IVD	CSDA	KLRK1	CRTAM	FBXW12	HCG2P7	COL6A2	SLC35E1	CBLB	DSC1	GALNT11	AGAP1	PDE4C	PECAM1	DCLRE1C	C12orf43	LRRC3	KIAA0753	TLL2	PDX1	SPG11	TSPAN32	PRKAR1B
GSE22886_NAIVE_CD8_TCELL_VS_MEMORY_TCELL_DN	http://www.broadinstitute.org/gsea/msigdb/cards/GSE22886_NAIVE_CD8_TCELL_VS_MEMORY_TCELL_DN	Sig175	AHR	AP2B1	GPR183	LIMS1	HIF1AN	FHL1	DSTNP2	ATP1A1	SESN1	GPR25	DEGS1	PBXIP1	MUC2	ST8SIA1	CBLL1	CAB39	MFHAS1	LINC00341	CSGALNACT1	ICOS	MAGEH1	UPF3A	SNX15	CD4	43717	CTSB	ACP5	EIF4G2	TRIM25	FUT7	TIAM1	HECA	PHTF2	TRADD	CMPK1	CAST	ETS1	GOLGA7	CORO1B	LRIG1	AP3M2	TRIB2	MTM1	EPHA4	CD44	ADD3	CHN1
GSE22886_UNSTIM_VS_STIM_MEMORY_TCELL_UP	http://www.broadinstitute.org/gsea/msigdb/cards/GSE22886_UNSTIM_VS_STIM_MEMORY_TCELL_UP	Sig176	IER2	CA5A	S1PR4	43717	SLC22A18	PIK3R1	TMC6	RPS9	NSA2	C3orf37	NAIP	SSR2	TBCC	RPLP2	MPRIP	CALHM2	UBA52	TRAPPC6A	SPTBN1	CD300A	CITED2	HMGN4	TMEM159	TMEM123	IFNAR2	RGS14	FAM117A	LIPA	MUC2	KDM4C	ITGA4	RAP2B	VILL	HCN4	SLC9A3R1	ARHGAP5	MARCKSL1	TCF20	JUN	TLE4	LOC652493	GPKOW	ACAP2	PRKRIR	CUTA	GMEB2	EPHB2
GSE22886_UNSTIM_VS_STIM_MEMORY_TCELL_DN	http://www.broadinstitute.org/gsea/msigdb/cards/GSE22886_UNSTIM_VS_STIM_MEMORY_TCELL_DN	Sig177	EED	MPDU1	PRPF4	BZW2	NCKAP1	TMEM70	BUB3	C12orf5	NOP2	HMGB2	NDUFS6	ELOVL1	C13orf27	FANCL	XPOT	SLIRP	FKBP4	SNIP1	CTNNAL1	TMEM48	ELAVL1	NUP107	ELAC2	MRPL13	HSPB11	DHX9	KIFC1	DSN1	FKBP1A	TNIP2	GNPAT	AMD1	TRMT5	CDK2AP2	CTR9	BARD1	HAX1	BCAP29	PIGF	RBM12	TCF12	MED6	ECHDC1	KIAA0020	POP4	SNRPD1	PSMA7
GSE22886_NAIVE_VS_MEMORY_TCELL_UP	http://www.broadinstitute.org/gsea/msigdb/cards/GSE22886_NAIVE_VS_MEMORY_TCELL_UP	Sig178	PARP16	CYP3A4	CORT	MPHOSPH9	PRKAR1B	XDH	DBT	SH3BP2	PPT2	PECAM1	TLL2	KIAA0753	FOXA2	SLC5A3	AES	HAUS2	PHF20L1	IPP	PHF1	SCN1B	EPN3	TCTA	SULT2B1	VPS11	ECHDC2	PION	ATM	CLDN15	KIAA0664	RBM12B	OVGP1	WASF1	FMO2	MYB	SBNO1	FOXH1	HSPC072	DCLRE1C	UPK2	MTPAP	PDE4C	ZMYND8	CEP250	DCTN6	TMED1	COL6A1	MIER2
GSE22886_NAIVE_VS_MEMORY_TCELL_DN	http://www.broadinstitute.org/gsea/msigdb/cards/GSE22886_NAIVE_VS_MEMORY_TCELL_DN	Sig179	DSTNP2	CBLL1	CHN1	ST8SIA1	EID1	LRIG1	GPR25	PLP2	ZFP36L1	ATP8B2	LPAR6	LIMS1	DEGS1	DNAJA2	CMPK1	CREBL2	ELK3	MDFIC	FBXO34	CALM1	FBXL8	VPS33A	ACVR1	RASGRP1	FUT7	AQP3	USP10	DAZAP1	CCR4	PBXIP1	CD40LG	MFHAS1	GGT1	SNX15	CCDC47	GLOD4	CD44	NFYC	RBL1	CASP2	IVNS1ABP	YWHAB	TMOD3	PPP1R2	RAD23B	AHR	ALCAM
GSE22886_NAIVE_TCELL_VS_NEUTROPHIL_UP	http://www.broadinstitute.org/gsea/msigdb/cards/GSE22886_NAIVE_TCELL_VS_NEUTROPHIL_UP	Sig180	SRSF7	MOAP1	DYRK2	C14orf1	DDX39A	RPA1	RCN2	ATP5G3	YBX1	SAMHD1	IMP4	IDH3B	HMGN3	SFPQ	DDX46	BRD7	RAN	RPS25	MAPRE2	TBL1XR1	PHB2	ASXL1	PLAC8	EIF3M	CD81	TGIF1	AIMP1	PHF15	PRKACB	MRPS35	C2orf28	DGKA	CCT8	TES	PWP1	FBXO21	WBSCR22	RNF113A	SRSF3	UFC1	COPS2	ATP5A1	TRA2B	IPO5	PEBP1	FBXO7	NAGPA
GSE22886_NAIVE_TCELL_VS_NEUTROPHIL_DN	http://www.broadinstitute.org/gsea/msigdb/cards/GSE22886_NAIVE_TCELL_VS_NEUTROPHIL_DN	Sig181	IL1B	KIAA0226L	HIST1H4H	SERHL2	CXCL1	CHP2	KCNJ2	HSPC072	ARPC5	NPL	SOD2	C20orf103	TUFT1	SLC22A4	PTGS2	CLEC4E	GPR97	DRAM1	VNN3	ARAP3	SLC7A11	PHC2	SEMA3C	RGS4	ST6GALNAC2	CPPED1	LOC57399	TTC39A	MEFV	TNFRSF10C	LIMK2	S100A12	STX3	PI15	SLC39A2	DDN	DPEP3	ZNF185	QPCT	CXCR1	RALB	DHRS9	APH1B	LY96	DGKG	FOXA1	TREM1
GSE22886_NAIVE_TCELL_VS_MONOCYTE_UP	http://www.broadinstitute.org/gsea/msigdb/cards/GSE22886_NAIVE_TCELL_VS_MONOCYTE_UP	Sig182	DOCK9	PTPRCAP	INPP4B	TXK	PLEKHB1	LIME1	TRIB2	CD6	SESN1	SIDT1	NELL2	CD2	LPHN1	BCL2	CD7	MAGED1	ITPR3	GPRASP1	UBASH3A	GOLGA8B	ABLIM1	RNF144A	DDHD2	CEP68	ADNP2	BCL11B	MGAT4A	LRIG1	ENO2	HMOX2	PLCG1	ITGA6	ABHD14A	LY9	IL32	LPIN1	ZNF276	DNAJC9	GPR18	CD96	SYNE2	SIRPG	MAL	SMYD3	LRBA	ZMYND11	PDCD4
GSE22886_NAIVE_TCELL_VS_MONOCYTE_DN	http://www.broadinstitute.org/gsea/msigdb/cards/GSE22886_NAIVE_TCELL_VS_MONOCYTE_DN	Sig183	KCNMB1	PTGS1	LY96	IRAK3	MNDA	NADK	CHST15	DAPK1	KIAA1033	SNX11	GCA	CSTA	LGALS3	METTL9	PRKCD	PLXNC1	NOD2	S100A9	PTPRE	DMXL2	MGAT1	ATP6V1A	SDCBP	S100A11	SLC31A2	SLC16A6	CTBP2	SLC15A3	FCGR2A	TNS3	FBP1	CD14	MFSD1	CKAP4	CREG1	GNS	CCR1	SEMA4A	LAT2	LILRB3	QPCT	CTSH	CTSB	ASAH1	RAB32	CASP1	SYK
GSE22886_NAIVE_CD8_TCELL_VS_NEUTROPHIL_UP	http://www.broadinstitute.org/gsea/msigdb/cards/GSE22886_NAIVE_CD8_TCELL_VS_NEUTROPHIL_UP	Sig184	LRIG1	FKSG2	MACF1	SRSF7	TSPYL4	SFPQ	XBP1	TXK	TUFM	WBSCR22	DUSP7	43714	SLMO2	MPHOSPH9	GRPEL1	APPL1	RUNX3	HNRPDL	DSCR3	TMEM147	ANKRD10	FAM102A	CEP68	BANF1	RNF220	POP4	SUCLG2	UBE3C	SUMO3	SF3A3	DENND2D	ACSL5	RPA1	RHOH	GCLC	PAN2	CDC23	SCAMP3	TTC31	DFFB	LEPROTL1	THYN1	DAZAP1	VTI1B	AIMP1	USP24	WDR11
GSE22886_NAIVE_CD8_TCELL_VS_NEUTROPHIL_DN	http://www.broadinstitute.org/gsea/msigdb/cards/GSE22886_NAIVE_CD8_TCELL_VS_NEUTROPHIL_DN	Sig185	SERHL2	LHX6	NFASC	LOC57399	LALBA	LY96	MMP19	DRAM1	VDR	BAMBI	SLC7A11	PI15	NCOA4	CD33	PTGS1	CTSS	ADAM28	ESR2	ARPC5	PAMR1	RGS4	HSPC072	SAT1	TEX13A	GLUL	APBA1	PRDM9	SLC31A1	ANXA13	ITGA2	NAMPT	TUBA1A	HIST1H4H	ADCK4	CD4	ECHDC3	PRKCE	CFTR	HMGB3P1	LGI2	LST1	C3orf51	SRGN	SMAD9	NRN1	CHP2	TIGD1L
GSE22886_NAIVE_CD8_TCELL_VS_MONOCYTE_UP	http://www.broadinstitute.org/gsea/msigdb/cards/GSE22886_NAIVE_CD8_TCELL_VS_MONOCYTE_UP	Sig186	BACH2	PRF1	DENND2D	PLEKHB1	GPR171	ZNF529	SYNE2	ITM2A	SP140	PASK	NR3C2	CD2	UNG	CD7	ITPR3	UBASH3A	BAG2	LIME1	ABCD2	CD69	HOPX	CD160	AKTIP	NCALD	GPRASP1	LRBA	DOCK9	PTPRCAP	NKG7	LOC282997	KLRC3	MAL	ZBTB25	NELL2	S1PR1	INPP4B	IL32	ADNP2	GRAP2	PRKCQ	LPHN1	LRRN3	NAA40	BCL11B	MGAT4A	SMYD3	GPR18
GSE22886_NAIVE_CD8_TCELL_VS_MONOCYTE_DN	http://www.broadinstitute.org/gsea/msigdb/cards/GSE22886_NAIVE_CD8_TCELL_VS_MONOCYTE_DN	Sig187	FCER1G	CHST15	IFI30	GLUL	CSTA	HSPA1A	S100A9	NOD2	HCK	LY96	LILRB1	LILRB2	IRAK3	CSF2RB	CTNNA1	RAB31	DAPK1	LYN	TNFRSF1B	CTBP2	KCNMB1	MNDA	FGR	ASAH1	WARS	IRF8	PTGS1	S100A11	GCA	LGALS3	TYROBP	BID	SNX11	SLC27A3	SERPINA1	NCF2	MAFB	SYK	CD93	SLC16A6	TNFSF13	LAT2	DPYD	CYBB	CTSB	BCL6	CD14
GSE24026_PD1_LIGATION_VS_CTRL_IN_ACT_TCELL_LINE_UP	http://www.broadinstitute.org/gsea/msigdb/cards/GSE24026_PD1_LIGATION_VS_CTRL_IN_ACT_TCELL_LINE_UP	Sig188	TNFSF10	STAT4	LGALS1	PHLDA1	GBP1	TMEM50B	IFI35	GZMA	VIM	IRF9	PSMB10	UBE2L6	PSMB8	CES2	BBIP1	ATP6V1D	JARID2	GSTO1	NT5E	CST7	SH2D2A	IFI6	STAT1	ALOX5AP	TIMP1	H3F3B	TRIM21	TRBC1	TMC7	PSMB9	ISG20	PSME1	S100A10	HLA-E	MT2A	RARRES3	CLEC2B	CD1C	EMP3	TAP1	RAB27A	DFNA5	PTPRC	RHOH	MT1X	CD3D	SH3BGRL3
GSE24026_PD1_LIGATION_VS_CTRL_IN_ACT_TCELL_LINE_DN	http://www.broadinstitute.org/gsea/msigdb/cards/GSE24026_PD1_LIGATION_VS_CTRL_IN_ACT_TCELL_LINE_DN	Sig189	DKC1	BMPR1A	CHST12	BLMH	GLS	TUBGCP4	AHCY	KIF2C	EIF3B	MON1B	SLC5A4	SKIV2L2	RSRC2	CCT2	ZNF236	C2orf3	GLRA3	YTHDC2	BUB1	RANGAP1	NFATC3	EFEMP1	PTCD3	C1QTNF3	TH1L	DIAPH2	KIAA1310	USP1	MPHOSPH9	HMGA1	EPS15L1	PRMT1	MCM7	BIRC5	YARS	HERPUD1	CRK	TAF5	ZNF207	UTP18	NARS	SORD	C7orf26	THOP1	NAALADL1	DDX1	PABPC4
GSE24081_CONTROLLER_VS_PROGRESSOR_HIV_SPECIFIC_CD8_TCELL_UP	http://www.broadinstitute.org/gsea/msigdb/cards/GSE24081_CONTROLLER_VS_PROGRESSOR_HIV_SPECIFIC_CD8_TCELL_UP	Sig190	PTGER4	PLXDC1	FAM125B	PLS1	LGMN	SLC7A5	NELL2	LOC646934	PIK3IP1	FZD6	ZNF238	NBEA	MYOT	TNFAIP3	MOAP1	MYH4	SEMA3D	FAM102A	RPL23	SOX21	ASB13	CXCR3	PBLD	RRAGB	MED21	SPINT3	VAMP2	IFRD1	APBA2	BIRC3	CCT6B	SLC15A2	LONP2	NKX3-1	FBXO42	RPS16	SESN1	AQP1	HSPH1	JMJD6	ASNSD1	MGP	DENND5A	LRRC40	ITGA5	SLC4A1	SPATA2
GSE24081_CONTROLLER_VS_PROGRESSOR_HIV_SPECIFIC_CD8_TCELL_DN	http://www.broadinstitute.org/gsea/msigdb/cards/GSE24081_CONTROLLER_VS_PROGRESSOR_HIV_SPECIFIC_CD8_TCELL_DN	Sig191	RSAD2	IFI44	OAS3	CHI3L2	GBP2	MLANA	XAF1	EIF2AK2	OAS1	IFI27	CPS1	RLN2	UNG	IFI44L	CD38	C7orf68	MAGIX	MYO1B	USP18	TRGV5	AP1S1	PHF14	IFNAR1	CEP55	CEACAM8	GZMB	TTC38	C7orf23	PCOLCE2	HIST1H2AC	IFI35	MYLK	SPIN2A	DSP	MAST4	PRSS23	PRF1	TNFAIP6	AFM	LY96	ATG3	SMC6	TAS2R4	CYP4F12	MSX2	TSHR	AIM2
GSE26495_NAIVE_VS_PD1HIGH_CD8_TCELL_UP	http://www.broadinstitute.org/gsea/msigdb/cards/GSE26495_NAIVE_VS_PD1HIGH_CD8_TCELL_UP	Sig192	DSC1	ARMCX1	PPAP2A	FBLN2	SULT1B1	LOC346887	MAL	RAB43	GAL3ST4	DCHS1	LMF1	SNED1	NRCAM	NT5E	C17orf48	C5orf13	MDS2	NOG	TKTL1	ZNF496	BEND5	EPHA1	MEST	EFNA1	ROBO3	TCEAL3	PLEKHG4	LOC641518	LRRN3	LOC100128252	ZNF238	KLF7	LOC100129858	NAT9	SLC16A10	CD248	MYB	LINC00282	LOC282997	TPST1	PLAG1	ZNF662	ATG9B	EFHA2	CBR3	LDLRAP1	UBQLN2
GSE26495_NAIVE_VS_PD1HIGH_CD8_TCELL_DN	http://www.broadinstitute.org/gsea/msigdb/cards/GSE26495_NAIVE_VS_PD1HIGH_CD8_TCELL_DN	Sig193	RAP1GAP2	EOMES	FAM179A	GZMA	SLAMF6	PYHIN1	ADAM8	RAB27A	S100A4	GPR68	SLC15A4	SLFN11	TGFBR3	LINC00152	C20orf3	TARP	DNAJC1	ATP2B4	SYT11	PAM	FGFBP2	CALHM2	LOC339988	MAP3K8	PTGDR	GBP5	TTYH2	TIGIT	MYBL1	ITCH	KAT2B	AUTS2	ARHGAP35	GZMK	FCRL3	GAB3	LPCAT1	LAG3	NPC1	B4GALT5	SFXN3	FYN	CCL5	ANXA2	JAKMIP2	GLCCI1	ATXN1
GSE26495_NAIVE_VS_PD1LOW_CD8_TCELL_UP	http://www.broadinstitute.org/gsea/msigdb/cards/GSE26495_NAIVE_VS_PD1LOW_CD8_TCELL_UP	Sig194	ZNF496	SULT1B1	MEST	LOC100507218	CDCA7L	OBSCN	AMIGO1	RAB43	FLNB	ARMCX1	PLEKHG4	DCHS1	DSC1	HSBP1L1	ATG9B	NOG	GPRASP2	SLC2A11	LDLRAP1	PIK3IP1	FOXO1	MDS2	NRCAM	LOC641518	EPHA1	HAUS5	SLC16A10	LOC100128252	PPAP2A	LOC346887	SFXN4	EDAR	LINC00282	LEF1	MAN1C1	EFHA2	CBR3	C1orf228	PLAG1	BPHL	SNED1	CD248	CARS	LOC282997	ZNF662	ARHGEF4	YPEL2
GSE26495_NAIVE_VS_PD1LOW_CD8_TCELL_DN	http://www.broadinstitute.org/gsea/msigdb/cards/GSE26495_NAIVE_VS_PD1LOW_CD8_TCELL_DN	Sig195	EOMES	S100A4	RAP1GAP2	LOC339988	CTDSP1	B4GALT5	GPR68	SNTB2	ADAM8	GZMA	DNAJC1	FAM179A	PQLC3	GBP5	CLEC2B	KLRG1	TGFBR3	RALGDS	PYHIN1	PIK3R5	ATP2B4	LAG3	MAN1A1	SPATS2L	EIF2C4	ANXA2	TPRG1	TIGIT	C20orf3	ADCY9	MAP3K8	FGFBP2	GNLY	TCIRG1	PITPNA	PPP4R1	RGS3	MCTP2	CCL5	PTGDR	TARP	KATNAL1	MYBL1	DOK2	DENND3	MBP	OPTN
GSE26495_PD1HIGH_VS_PD1LOW_CD8_TCELL_UP	http://www.broadinstitute.org/gsea/msigdb/cards/GSE26495_PD1HIGH_VS_PD1LOW_CD8_TCELL_UP	Sig196	INMT	GALM	BRCA1	CBFA2T2	TAS2R1	SLC4A3	BPHL	RTN4R	HNRPLL	SF1	ICOS	ADAMTS17	ETS1	TCL1A	SCARB1	TBC1D4	LOC100128239	P2RX5	TMEM63C	GBP5	C16orf54	ITIH3	LOC643401	RNASET2	C15orf40	LOC100129166	SLAMF1	EME2	TMEM66	BLVRA	TRBC1	ST8SIA1	FANCD2	TMEM170A	ITGA6	ZNF329	RANBP9	CCDC64	RPL23AP32	PBXIP1	GNAS-AS1	HLA-DOA	GAMT	43714	KANK2	LOC100130691	JMJD8
GSE26495_PD1HIGH_VS_PD1LOW_CD8_TCELL_DN	http://www.broadinstitute.org/gsea/msigdb/cards/GSE26495_PD1HIGH_VS_PD1LOW_CD8_TCELL_DN	Sig197	LYN	HOPX	HDGFRP3	SH2D1B	FOXD1	NOTCH1	KIR2DS2	GLUL	ADRB1	ITGAX	GAS7	BOK	LAT2	DSTN	OSBPL5	HMCN1	KIR2DS1	CES1	KIR2DS5	KIR3DL3	NCR1	CD320	DSG1	KIR3DL1	PRSS30P	ABHD2	KLF8	BNC2	KIR2DL5A	TLR4	LOC732275	HSH2D	CHRNB1	CPSF4	RXRA	METTL7A	FRY	TSHZ3	NQO1	DUSP22	GPER	KLRD1	IQCG	TYROBP	KIR2DL3	PDE4A	C14orf28
GSE26669_CTRL_VS_COSTIM_BLOCK_MLR_CD8_TCELL_UP	http://www.broadinstitute.org/gsea/msigdb/cards/GSE26669_CTRL_VS_COSTIM_BLOCK_MLR_CD8_TCELL_UP	Sig198	RNF19B	TARS	PSMA2	VIM	HPRT1	PPP3CC	CYP11A1	TIAM1	TAP2	GATAD1	AQP9	MOV10	PSMB4	ERCC6L	UBXN2A	PPP6C	GPR97	CHAF1B	SLC25A13	HSD17B7	PGM5	ALG14	DYNLL1	GNPNAT1	TOMM7	IDI1	IL15	RBM14	VMA21	NOV	RBL1	NDUFC1	NCOA7	TIMM22	CD86	ELAVL2	FAM105B	ACOT11	GPT	MED24	EIF5A	E2F8	TAPBP	RABEPK	MRPL48	ELMO2	LMAN1
GSE26669_CTRL_VS_COSTIM_BLOCK_MLR_CD8_TCELL_DN	http://www.broadinstitute.org/gsea/msigdb/cards/GSE26669_CTRL_VS_COSTIM_BLOCK_MLR_CD8_TCELL_DN	Sig199	EVI2B	ACVR1B	LCMT2	IFNGR1	LYL1	JUNB	FAM120B	DDI2	MZT2B	PITPNM1	EYA2	QRICH1	PRDM5	SLC25A40	DCAF15	SCD	FXYD7	ERRFI1	CD180	ACP5	EPHX1	CREBBP	ZNF708	RAB14	MAPK14	ZBTB12	ATF7IP	PLEKHA6	LRP10	EBF1	KLF7	MAGED1	PPP1R21	FAM65B	PKN1	NISCH	C7orf57	FAM43A	AXIN1	NLK	HOPX	POLR2A	C9orf21	DUSP16	TRIAP1	CXCR5	DTX4
GSE27786_LSK_VS_CD8_TCELL_UP	http://www.broadinstitute.org/gsea/msigdb/cards/GSE27786_LSK_VS_CD8_TCELL_UP	Sig200	COQ4	MAPK14	RNASE6	ARHGAP21	ZKSCAN1	NTPCR	SRRT	TMEM106C	DHRS3	C20orf177	FADS1	MTFR1	UBFD1	HSPA12B	NDST1	TNFRSF1A	E2F8	FAM135A	TSPAN4	LPIN2	SIRT4	KDM2B	CCDC120	NFIC	C11orf1	LTBR	GCSH	C11orf24	RASGEF1B	REV1	ITPRIPL2	ARHGAP18	HK1	C12orf75	CC2D2A	MIB1	TRAK1	LIX1L	ENOX2	HNRNPA0	ADAMTS12	METTL7A	CITED2	COL4A1	CLDN12	C11orf74	PPM1L
GSE27786_LSK_VS_CD8_TCELL_DN	http://www.broadinstitute.org/gsea/msigdb/cards/GSE27786_LSK_VS_CD8_TCELL_DN	Sig201	TOMM7	SURF1	TTLL11	ABI1	VAMP4	KLF3	NDRG3	RPL31	PSMB10	KIDINS220	VWA3A	ESCO1	AEBP2	DZIP1	TNFRSF18	RHOG	ESYT1	GPR37	RAP2B	SLC30A1	LAPTM5	KLF15	C19orf43	RRAD	KLRG1	SMARCD2	RNF19A	PIP5K1A	CACNG4	FAM21A	SLC37A3	ANKRD12	ROCK1	TMEM179B	AQR	ERRFI1	ITGA1	SNF8	GABRR2	FLNA	AIP	REXO2	AKR1B1	PANK4	MRAP2	CPEB4	PTCH1
GSE27786_LIN_NEG_VS_CD8_TCELL_UP	http://www.broadinstitute.org/gsea/msigdb/cards/GSE27786_LIN_NEG_VS_CD8_TCELL_UP	Sig202	SMPD4	P4HB	TIMM8B	KCTD3	TGIF2	CUL1	VDAC3	SAMM50	METTL15	PHTF2	LOC474358	PIK3CD	ZFP30	SCARF1	CCDC146	DCTD	CHST11	HK2	SUV39H1	KIAA1958	PDGFD	SRRT	GCSH	FADS1	KDM2B	MYO3A	C13orf16	EXOC6	NUCB1	AQP9	SYTL4	CCNF	OGFRL1	MRPL42	STRBP	AK3	SMO	GSTM4	FDPS	AKIP1	VAT1	TACC3	CTNNA1	ST7	MPHOSPH6	RBBP8	ATP5S
GSE27786_LIN_NEG_VS_CD8_TCELL_DN	http://www.broadinstitute.org/gsea/msigdb/cards/GSE27786_LIN_NEG_VS_CD8_TCELL_DN	Sig203	EIF3E	REXO4	ZNF7	MBNL1	SLC20A1	ESCO1	CEPT1	OBFC2A	ZMYND17	SIT1	RNF123	PLEKHA2	MAL	OSTM1	VAMP4	PIP5K1A	LYST	MALAT1	RASSF7	EIF3K	AMN1	TRIP12	TOMM7	ITPK1	GPATCH2	POGZ	AEBP2	ANAPC16	PTPRCAP	TMEM146	RPLP2	BABAM1	AP3M2	CAMK2B	ITGAL	CSNK1G2	SP1	RNF165	MRAP2	EEF1G	GABRR2	TNFAIP1	MAN2A1	PKD1	ITGB2	RTP4	DDX58
GSE27786_CD8_TCELL_VS_ERYTHROBLAST_UP	http://www.broadinstitute.org/gsea/msigdb/cards/GSE27786_CD8_TCELL_VS_ERYTHROBLAST_UP	Sig204	TTC35	FAM172A	PLEKHJ1	GLB1	CNOT2	RASGRP2	PGLYRP1	TRIM14	ANAPC10	SPATA6	C14orf102	TCF25	BTF3	GSTO1	DCAF15	ZC3H7A	CORO1C	MPHOSPH10	PPP3CA	BCLAF1	NFKBIZ	POMP	PHF23	TUBB2B	LAIR1	NISCH	CLUAP1	STYX	NRBF2	RAD1	NDUFAF4	BCL2A1	OGFOD1	C22orf39	COASY	HMG20A	GIT2	RNF44	CASC4	CSRNP1	LMBRD1	CTDNEP1	LTA	FIBP	FPGT	KDELC1	KLC1
GSE27786_CD8_TCELL_VS_ERYTHROBLAST_DN	http://www.broadinstitute.org/gsea/msigdb/cards/GSE27786_CD8_TCELL_VS_ERYTHROBLAST_DN	Sig205	TSKU	PPP1R3C	SMR3A	OOEP	CTTNBP2	IPMK	OC90	CXCL14	ASAH2	C6orf132	NAV3	STRADB	PIK3R3	LMLN	ZNF786	CHRD	SGK3	GET4	CCDC120	PALB2	NRAP	IFIH1	LOC256676	FZD4	FUT2	MGAM	LOXL3	IGFBP6	KIAA0146	WBSCR27	GPIHBP1	TIMM50	CPEB4	RNF39	SPINK4	ZFR2	DNM1	TDRD7	FEZF1	RCVRN	FXYD2	HECW1	ZDHHC14	ANKRD54	C5orf30	ELL3	MYCBP
GSE27786_CD8_TCELL_VS_NEUTROPHIL_UP	http://www.broadinstitute.org/gsea/msigdb/cards/GSE27786_CD8_TCELL_VS_NEUTROPHIL_UP	Sig206	SHMT1	PGGT1B	RRP36	RPAIN	ERCC5	LCMT2	GPAM	IMMP1L	IFT46	SETD2	LDB1	PHGDH	EXT1	DRG2	TARS2	C16orf42	SLC22A5	KDELC1	AMMECR1L	C18orf45	COQ6	STYX	AP3M2	ACAA2	METTL3	ATP5B	HELB	SPATA6	USP38	GLRX3	PHF20	C17orf39	BOP1	NAB2	PTGIS	FCF1	EIF2B4	CCAR1	GNL2	MRPL34	MKL2	TRIM35	SETDB2	RHEBL1	SLC35A4	TTLL12	RAD1
GSE27786_CD8_TCELL_VS_NEUTROPHIL_DN	http://www.broadinstitute.org/gsea/msigdb/cards/GSE27786_CD8_TCELL_VS_NEUTROPHIL_DN	Sig207	ACVR1B	TRAPPC5	BATF2	HSD17B14	SASS6	UXS1	GJA4	DOK7	RANBP9	PBK	ATP11C	SLC7A11	TMEM30A	OSBPL7	TEAD1	FBXL19	ASB6	UBD	C6orf72	NISCH	ARHGEF4	TRAM2	TRAPPC10	MYO19	GPR153	TIAM2	IREB2	GAS2L3	RSPH3	CCDC126	RGS6	DMBX1	RGN	FUT2	CDC27	CDK14	KIAA1919	PDIA2	PTPN9	CD4	MASTL	LOC644925	NNT	FOXN2	DEPTOR	ATXN1L	TMEM120A
GSE27786_CD8_TCELL_VS_MONO_MAC_UP	http://www.broadinstitute.org/gsea/msigdb/cards/GSE27786_CD8_TCELL_VS_MONO_MAC_UP	Sig208	DUS3L	POU5F2	LAPTM5	ANAPC16	RCCD1	IMMP1L	SLFN13	ZNRD1	UBA1	CTU1	FLNB	HNRNPH1	TRIM44	LCMT2	TNFRSF18	PSMD12	TMEM70	SPATA6	IRF1	MED12	MAF1	C5orf41	C11orf35	NEK7	ABHD14A	ANGPTL4	PDCD1	FAM120B	CCDC51	HUWE1	C2orf76	TIMM13	ATPAF1	ZNF169	SETD2	ATP5B	ZBTB44	CAMK2B	C7orf11	IGBP1	BANF1	DDX24	MLYCD	TOMM7	AFG3L2	AEBP2	ZNF800
GSE27786_CD8_TCELL_VS_MONO_MAC_DN	http://www.broadinstitute.org/gsea/msigdb/cards/GSE27786_CD8_TCELL_VS_MONO_MAC_DN	Sig209	MYBPC1	TTLL11	SASS6	C16orf93	UXS1	SYCP1	FOXI1	RAB14	HSPA4L	POC1A	CYP4A22	NKIRAS2	AMDHD2	LRRC8D	SGK3	C16orf78	TACC1	SHFM1	FAM164A	CDK11B	ATXN1L	OBP2B	BZRAP1	TIMP2	PDZD8	SLC24A6	GPC1	DPY19L4	CLEC10A	NAA38	NFIC	FARP1	MPP1	NETO2	KRT28	ATP2A3	ADA	MYL1	MIR22HG	RALGAPA1	DTX4	ARAP3	COX19	YAF2	LIMS3L	GPR137B	PI4K2B
GSE30962_PRIMARY_VS_SECONDARY_ACUTE_LCMV_INF_CD8_TCELL_UP	http://www.broadinstitute.org/gsea/msigdb/cards/GSE30962_PRIMARY_VS_SECONDARY_ACUTE_LCMV_INF_CD8_TCELL_UP	Sig210	RRM2	NRP2	KIF22	STMN1	TTK	MCM5	NCAPD2	IKZF2	MRPL51	MCM10	EZH2	STT3B	RFX2	GALNS	CKS1B	BTLA	DBI	CDC6	MND1	SPC25	CENPF	ASAP1	SMC2	CASS4	C17orf53	TEX9	AP1B1	MXD3	CCNA2	VWA1	ASPM	TOP2A	TRIP13	GINS1	CKAP2L	CENPN	BUB1B	E2F8	KIF18B	NDUFA4	CDCA3	SLC27A5	LIG1	AKAP1	DSCC1	PSPC1	KPNA2
GSE30962_PRIMARY_VS_SECONDARY_ACUTE_LCMV_INF_CD8_TCELL_DN	http://www.broadinstitute.org/gsea/msigdb/cards/GSE30962_PRIMARY_VS_SECONDARY_ACUTE_LCMV_INF_CD8_TCELL_DN	Sig211	FCGR2B	RNF111	UBASH3B	IL17D	HIST2H2BF	GIMAP1	SYNE1	LDLRAP1	JHDM1D	GPR114	SS18L1	RBL2	ARL4A	MYOM2	PLEKHM3	IL15	PANK3	TMPRSS13	CNRIP1	PRR13	EPS8	RCAN1	CALCB	ZDHHC2	PCTP	RGS2	F7	FGF13	TTC39C	VWA5A	RNF128	NPC2	PHF13	CPEB3	SNTB1	NSUN6	TKTL1	PAWR	MAPRE2	NR1D2	PRUNE	YES1	FRAT2	BMPR1A	TXNIP	MYLIP	SEPP1
GSE30962_PRIMARY_VS_SECONDARY_CHRONIC_LCMV_INF_CD8_TCELL_UP	http://www.broadinstitute.org/gsea/msigdb/cards/GSE30962_PRIMARY_VS_SECONDARY_CHRONIC_LCMV_INF_CD8_TCELL_UP	Sig212	TCF7	FAM81A	AFF3	MNS1	ART3	HMGN3	PDLIM1	CCDC58	BPHL	THADA	CXCR3	ACAD9	IKZF2	COQ4	URB2	POP5	SLAMF6	TNPO1	TUBGCP2	TBC1D4	TNFRSF25	P2RX7	PTRH1	SNRPB2	XCL1	PCNA	CXCL10	CD83	NCBP2	SUV39H1	KIF22	DKK3	TIMELESS	ABCA3	HOOK1	EHD3	ST6GAL1	APOOL	TNS1	PEX11A	PSPC1	SOSTDC1	ASF1A	HAUS1	LYRM4	CXorf26	IQCG
GSE30962_PRIMARY_VS_SECONDARY_CHRONIC_LCMV_INF_CD8_TCELL_DN	http://www.broadinstitute.org/gsea/msigdb/cards/GSE30962_PRIMARY_VS_SECONDARY_CHRONIC_LCMV_INF_CD8_TCELL_DN	Sig213	YES1	GZMK	PURA	SRGAP3	TP53INP2	PLIN2	UBASH3B	ITPRIPL2	GSTT1	SFI1	SERPINE2	C6orf168	TMPRSS13	GFI1	DENND3	FILIP1	CDKN1A	PLCG1	PRR13	GLRX	CAPG	GPR114	CLDN12	CD109	FLOT2	KLRG1	AMIGO1	PIK3R6	EPDR1	C19orf12	AGPAT4	ADRB1	AP3M2	GGH	ZBTB38	TMBIM1	PERP	RNF128	ATP6V0B	CD244	RASGRP1	PPAPDC2	CNRIP1	SLC22A12	FGF13	KCTD12	LOC81691
GSE30962_ACUTE_VS_CHRONIC_LCMV_PRIMARY_INF_CD8_TCELL_UP	http://www.broadinstitute.org/gsea/msigdb/cards/GSE30962_ACUTE_VS_CHRONIC_LCMV_PRIMARY_INF_CD8_TCELL_UP	Sig214	SMAD3	KCTD2	SLC20A1	GPX8	SUN2	GABARAPL2	LIMD1	NHSL2	FGF13	GTF2I	SLC37A1	HOPX	STAT6	FCGRT	PLCG1	HLA-A	AS3MT	C7orf73	SLCO3A1	PRKX	STK38	KCNJ8	PHF21A	ARMC7	ICAM1	LOC286467	TNFAIP8L2	C10orf54	NOD1	PEA15	BCL9L	PHF21B	PBXIP1	GZMM	LTB	FAM160A2	LOC728392	LEPREL4	FCGR2B	GALNT10	FAM117A	PRKAB2	FAM189B	DOCK5	ABCA6	C10orf32	PGM2L1
GSE30962_ACUTE_VS_CHRONIC_LCMV_PRIMARY_INF_CD8_TCELL_DN	http://www.broadinstitute.org/gsea/msigdb/cards/GSE30962_ACUTE_VS_CHRONIC_LCMV_PRIMARY_INF_CD8_TCELL_DN	Sig215	MMD	BUB1	LAG3	HAT1	TFRC	RSAD2	NAPSA	HELLS	PSPC1	SEMA4C	SPAG5	CBLB	CPT1A	MAD2L1	SPATS2	CHST2	ST14	NOP58	SLC6A13	ADK	IL21	MIS18BP1	TOX	EGR2	HOOK1	TOX2	FANCD2	PAQR4	SPC25	RFC4	WDR67	STAU2	CXCL10	LPGAT1	RANBP1	HMGN3	UTP6	TFDP2	PCGF5	SLC25A13	NCAPG2	CD244	AKR1E2	LITAF	AIM2	GLDC	RNF128
GSE30962_ACUTE_VS_CHRONIC_LCMV_SECONDARY_INF_CD8_TCELL_UP	http://www.broadinstitute.org/gsea/msigdb/cards/GSE30962_ACUTE_VS_CHRONIC_LCMV_SECONDARY_INF_CD8_TCELL_UP	Sig216	C10orf54	STK38	CYTIP	ANKRD17	SGK1	PRKAB2	MXRA7	ANTXR2	LAIR1	ZEB2	TANC1	CPNE3	PEAK1	GPRIN3	SBK1	DBNDD2	KRTCAP2	MAML2	NCALD	NHSL2	TCF7	CBR1	MYOM2	CYP17A1	SSH2	NR1D2	IER3	SH3BP5L	DTX1	SEPP1	RAP2A	LRRC8A	TCEANC2	GSK3B	NCLN	TNFAIP8L2	CX3CR1	SLCO3A1	MEIS3	SLC25A45	KLRD1	RXRA	AQP9	NRP2	GABARAPL2	CDC20B	RRAD
GSE30962_ACUTE_VS_CHRONIC_LCMV_SECONDARY_INF_CD8_TCELL_DN	http://www.broadinstitute.org/gsea/msigdb/cards/GSE30962_ACUTE_VS_CHRONIC_LCMV_SECONDARY_INF_CD8_TCELL_DN	Sig217	EZH2	ACOXL	JDP2	CD109	TMCC3	PIP4K2A	CENPH	RTP4	DUSP6	HMGB3	TK1	STT3B	SERPINB9	TEX9	CENPE	IRF8	AKR1B15	DDX1	BCAP29	CD81	SNRNP35	KIAA1524	GCSH	HELLS	EHD4	AIFM1	TIPIN	ST14	HOOK1	GPD2	TACC3	SPC25	NUP93	NPNT	TOP2A	MCM8	UBASH3B	SERPINE2	DUT	ISG20	SYNPO	CPT1A	ARHGAP11A	ITIH5	EPCAM	SEMA4C	RCN1
GSE32423_MEMORY_VS_NAIVE_CD8_TCELL_UP	http://www.broadinstitute.org/gsea/msigdb/cards/GSE32423_MEMORY_VS_NAIVE_CD8_TCELL_UP	Sig218	HOPX	GUCY2D	INPPL1	TRPC5	CA11	GRAP	TBKBP1	PITX3	IFITM10	CXorf21	CXCR5	CHIC1	PTPN13	IGSF23	KCNK6	REG4	AHNAK	PDE8A	C1orf194	TSPAN31	DDR1	PGLS	LSR	FGF22	RUNDC3A	CRMP1	DNAJA4	RHOB	GCAT	NEFH	CLSTN1	SERPINB6	SDF2	RGNEF	CORO7	ACOT7	CTLA4	SLC25A22	PTPDC1	NT5E	NRG1	NUAK2	BCL2A1	C2orf50	SERF1A	FITM1	PRSS12
GSE32423_MEMORY_VS_NAIVE_CD8_TCELL_DN	http://www.broadinstitute.org/gsea/msigdb/cards/GSE32423_MEMORY_VS_NAIVE_CD8_TCELL_DN	Sig219	ARMCX4	TCF7L2	MTSS1	NDRG1	PPP1R12A	BAZ2B	GNB4	C7orf42	SSR1	XKRX	PLCB4	QPCT	PRPF3	DAPK1	KIF13A	PAIP1	MEAF6	AMPD1	PTPRF	SMNDC1	RAB14	PHF8	CTSC	SESN1	ZHX1	KPNA3	ARMCX2	ITM2A	GMCL1	STAM	SECISBP2L	SOX4	ADAR	BCL9	TNFSF11	FAR1	PRADC1	ZNF251	TUBB2B	NUP153	TSPYL1	FXYD7	LDHB	BEND5	SSBP3	ATF1	TMEM120B
GSE32423_MEMORY_VS_NAIVE_CD8_TCELL_IL7_UP	http://www.broadinstitute.org/gsea/msigdb/cards/GSE32423_MEMORY_VS_NAIVE_CD8_TCELL_IL7_UP	Sig220	ISCA2	C9orf93	UST	C6orf192	IPCEF1	EI24	C11orf54	UNC50	NANOS1	FRMD5	SGMS1	TMEM150C	LRRC18	OSBPL9	HEG1	C1orf216	RNF39	MFAP5	YES1	ARHGEF12	BEND4	DIP2A	DENND4C	UNC5CL	FSTL1	FBXW7	SPSB1	EID2	ACYP2	ATP8B1	ANKH	TP53INP1	SLC25A28	NEAT1	IFNAR2	ST8SIA1	CBX7	SMAD5	CAMK2B	BTBD6	PBX3	NT5C3	P2RY14	C12orf5	ATP11A	C6orf170	KIAA1324
GSE32423_MEMORY_VS_NAIVE_CD8_TCELL_IL7_DN	http://www.broadinstitute.org/gsea/msigdb/cards/GSE32423_MEMORY_VS_NAIVE_CD8_TCELL_IL7_DN	Sig221	SPC24	ALDH9A1	GUK1	FAM83E	BAZ2B	SGTA	MINA	MEF2D	BATF3	PIM3	EBAG9	MBD5	MTFP1	WDR43	LAP3	NANP	EHD4	STX2	KANK3	TMEM41A	PPRC1	KLF10	SULT1B1	BRI3BP	ABHD8	DET1	ZNF830	CAP2	SUOX	SLC35A4	NKD1	API5	MTHFD1	AMIGO2	SOLH	C4B	KLHL11	GTSF1L	TRAPPC6A	RBP1	CSRP2BP	SLC31A1	C12orf68	SLC16A2	DVL2	AMN	NOP16
GSE32423_MEMORY_VS_NAIVE_CD8_TCELL_IL7_IL4_UP	http://www.broadinstitute.org/gsea/msigdb/cards/GSE32423_MEMORY_VS_NAIVE_CD8_TCELL_IL7_IL4_UP	Sig222	KCNC2	ABCB1	APOA1	IL24	FARP1	TTLL6	BEX2	SLC36A2	STRM	NAAA	C19orf81	TPTE	FCGR2A	SELE	ZBTB42	NOD1	MIA2	CRYBG3	FUT2	ECHDC3	TMCO4	C5AR1	PRKG1	SEPW1	COX6B2	FZD6	NRK	ZNF354B	PRRT3	JPH4	ALDH5A1	KRTAP8-1	BDH2	FAM135A	C20orf165	REG3A	C10orf11	SLC22A17	GRM5	C7orf34	CTDNEP1	DNAJC22	NPHS1	KCNJ11	SGK223	HFE	C12orf28
GSE32423_MEMORY_VS_NAIVE_CD8_TCELL_IL7_IL4_DN	http://www.broadinstitute.org/gsea/msigdb/cards/GSE32423_MEMORY_VS_NAIVE_CD8_TCELL_IL7_IL4_DN	Sig223	C14orf38	C9orf152	MAPK9	PHGDH	C8orf37	DEPDC5	BAZ2B	VPS4A	HSP90AA1	PEPD	ITGA10	ZC3H14	TTC37	MPP4	SNX25	GLE1	FBXO45	PCCA	RCOR3	BUB3	PRICKLE1	C21orf56	GGA2	TUBB2B	TTC9C	METTL2B	GPRIN3	C1orf21	TAGAP	LUC7L3	TMEM168	TESK2	SCML4	CDC14A	MBNL3	FAM208B	DIP2C	STX6	PSMD11	BCLAF1	CCDC76	EEF1G	TMEM154	ST7	ZNF706	APC2	DLD
GSE32423_CTRL_VS_IL7_MEMORY_CD8_TCELL_UP	http://www.broadinstitute.org/gsea/msigdb/cards/GSE32423_CTRL_VS_IL7_MEMORY_CD8_TCELL_UP	Sig224	C15orf62	MARCKS	C12orf68	KRTAP26-1	ELF3	OTUD7A	PPIB	PCDH19	KRT23	SLC22A13	HS2ST1	GABRG2	COQ7	HEMGN	SRF	ZXDB	HEMK1	SHROOM3	LGI2	MSMB	TGIF2LX	RPE65	DENND2A	IL34	GUCA1B	SVEP1	LRTM1	TTPA	ProSAPiP1	SIGLEC1	SNAPC2	KAZN	SORD	PLCD1	LOC157627	CCDC85A	TMEM236	METTL21D	OLFM1	LANCL3	VSTM5	CREB5	HSD17B10	UACA	LRFN1	DPH3	SETD1A
GSE32423_CTRL_VS_IL7_MEMORY_CD8_TCELL_DN	http://www.broadinstitute.org/gsea/msigdb/cards/GSE32423_CTRL_VS_IL7_MEMORY_CD8_TCELL_DN	Sig225	DUT	CHMP4C	ELAVL4	SKIV2L2	TNFSF14	LHPP	CRX	SLC12A1	CRY1	INHA	GXYLT2	TBCEL	LHFP	GULP1	TBCK	UBE2G1	TMIGD1	CABYR	ST3GAL6	PRKD1	LYRM7	PARP14	MEP1B	S100A5	PHTF2	RXFP2	GNAS	RGS10	FCHO2	CLCA4	LRTM2	WT1	CYP19A1	ADCY10	CHORDC1	ASPH	KIAA0564	GPR124	RUNX3	EIF3E	HSD3B1	RPS16	LCN12	ATG2B	TAOK3	SET	LIN28B
GSE32423_CTRL_VS_IL4_MEMORY_CD8_TCELL_UP	http://www.broadinstitute.org/gsea/msigdb/cards/GSE32423_CTRL_VS_IL4_MEMORY_CD8_TCELL_UP	Sig226	HAAO	PLXNB2	RAB11FIP4	IL1RL1	PGAP1	MAP4K4	LDLRAP1	IQGAP2	BCOR	TAGLN2	SYTL4	RSPRY1	RUNDC1	GTF3C5	FAM107B	DYRK3	APP	CD320	PYGL	ARAP1	EMB	LPGAT1	RHOB	OSBPL9	FRAT2	EFNB3	C11orf1	POU6F1	TFEC	ACTB	AHNAK	KCNV1	ARMCX2	STK32B	FAM108B1	RIF1	NLRP4	TMEM63A	ZDHHC2	TMBIM1	MEX3B	ATP8B4	SLC20A1	POU2F1	HVCN1	STK11IP	WBP5
GSE32423_CTRL_VS_IL4_MEMORY_CD8_TCELL_DN	http://www.broadinstitute.org/gsea/msigdb/cards/GSE32423_CTRL_VS_IL4_MEMORY_CD8_TCELL_DN	Sig227	VPS4A	NAALADL1	MRPS25	HSD17B7	PIP5K1C	TBCK	ATG9A	ADH4	PSMD14	EPHA3	SLC39A6	SLC12A1	YARS	CTSZ	MRPS15	SLC35F1	SPATA5L1	UST	MOV10	DENND5A	SNRPN	MRPL30	SLC6A5	BCAP31	PPP3CC	DENND2A	DCAF4	ZFP1	FSCN2	ACAT2	C10orf140	MAMLD1	PRSS23	LRRC2	NIPA1	G0S2	NGFR	C18orf8	AK2	HLA-E	COL10A1	SSPN	CLIC5	OAS1	PINX1	DBNL	LRRC47
GSE32423_CTRL_VS_IL7_IL4_MEMORY_CD8_TCELL_UP	http://www.broadinstitute.org/gsea/msigdb/cards/GSE32423_CTRL_VS_IL7_IL4_MEMORY_CD8_TCELL_UP	Sig228	THUMPD1	DLL1	TOB1	EMB	HNRNPF	ORMDL3	UNKL	DUT	CD96	NRK	DLD	FAM71A	LDLRAP1	SMPD4	S100B	ABCC12	CDC14A	MAP3K4	UBE2D2	FAM107B	SORL1	CDK17	STK10	DMRT2	ZBTB43	AVL9	THRAP3	LANCL3	RNF128	PLCXD2	C4orf32	CHST8	IQGAP2	SWT1	MTMR10	BBS9	FRAT2	TWSG1	PTP4A2	CXorf22	HERPUD2	HNRNPH1	TEX9	HEMGN	RNF144A	ARSB	C3orf17
GSE32423_CTRL_VS_IL7_IL4_MEMORY_CD8_TCELL_DN	http://www.broadinstitute.org/gsea/msigdb/cards/GSE32423_CTRL_VS_IL7_IL4_MEMORY_CD8_TCELL_DN	Sig229	COG4	C2orf65	ZNF784	PRND	C3orf15	TRAPPC5	MFAP3	ZNF23	NEU2	VPS29	PSMD14	CASP14	SLIT2	SYCE2	ACTR1A	MTMR11	CHST1	ASCL2	PILRA	CASP4	SERF2	FXR2	FNTB	SARS	RAB1B	MAP1S	PRM3	SH3GL1	PLEKHF1	MEN1	NUDT5	CLRN3	BCAP31	COX6B2	C1S	DCAF4	CNOT3	THOC7	CABYR	SRP68	MRPL19	PINX1	SLC26A7	MRPL42	G0S2	HLA-DMB	RCN1
GSE32423_IL7_VS_IL7_IL4_MEMORY_CD8_TCELL_UP	http://www.broadinstitute.org/gsea/msigdb/cards/GSE32423_IL7_VS_IL7_IL4_MEMORY_CD8_TCELL_UP	Sig230	CDC14B	DTX4	RXRA	FGF2	IP6K1	PTPN12	KDM1B	NEAT1	B3GALNT2	GLE1	C22orf36	UBASH3B	TMBIM1	EMB	GART	ABCC5	PTS	ACADM	STAG3	RTN4	RAMP1	APPL2	STOML1	RECK	ZNF679	CRYBG3	RB1CC1	XPC	ATXN3	C9orf41	HNRNPA0	ACSBG1	ASB1	C10orf54	ROD1	PHF15	ISCA2	CEP95	ABI2	EEF1G	P2RX4	WDYHV1	METTL2B	RPS6KA5	PANK1	DAGLB	ATP6V1D
GSE32423_IL7_VS_IL7_IL4_MEMORY_CD8_TCELL_DN	http://www.broadinstitute.org/gsea/msigdb/cards/GSE32423_IL7_VS_IL7_IL4_MEMORY_CD8_TCELL_DN	Sig231	DMRTC2	MTUS2	DHH	PHGDH	CYP2A6	RPL41	SAP18	C1orf216	NUP62	ASNA1	P2RY10	SARS	CHPF2	VPS11	C2orf65	APOOL	COG4	PAK1	NUMBL	TAMM41	TRIP6	OR51B6	NANP	CXXC1	TRAF7	HLA-DMB	GZMB	MRPL49	NEU2	CYB5A	LSM4	CKAP2	TAS2R4	SF3B14	WNT2	NUDT5	CASP14	TMEM111	XBP1	IL18BP	HMBS	C5orf44	SDF4	ASCL2	ARFGAP3	SLIT2	LOC148413
GSE32423_IL7_VS_IL4_MEMORY_CD8_TCELL_UP	http://www.broadinstitute.org/gsea/msigdb/cards/GSE32423_IL7_VS_IL4_MEMORY_CD8_TCELL_UP	Sig232	CASP9	TMEM64	C12orf75	C18orf54	PTPN22	CWC22	FGF2	METTL2B	ANKRD49	ACP5	C22orf36	PURG	ANXA7	UBE2H	RAB11FIP4	HEG1	TSN	H3F3C	CDC25B	ABCC5	ACTR6	LRFN5	FAM114A1	ARL2BP	TRMT1	VAMP2	TAGLN2	RNF39	ACTL6B	RNF24	GPD1L	IPCEF1	ZNF679	PUM1	TRIM2	NEURL1B	CCDC34	PCMTD1	CERK	PRKACB	PPARGC1B	MSN	MED14	ACSBG1	PTPRK	SLC45A3	KLF7
GSE32423_IL7_VS_IL4_MEMORY_CD8_TCELL_DN	http://www.broadinstitute.org/gsea/msigdb/cards/GSE32423_IL7_VS_IL4_MEMORY_CD8_TCELL_DN	Sig233	DMKN	ADH4	FAM159B	RNPEP	SMARCE1	PGK2	SETD1A	FAM156A	TMEM104	SUSD3	BATF3	CHCHD10	ST6GALNAC5	PFKM	IFIT1B	CHURC1	TRIM26	C15orf17	TGFBR3	C21orf91	C4B	DMRTC2	KRTAP26-1	NTAN1	CIB1	TAMM41	MTIF3	CNP	PKNOX2	ATP5J2	PKN3	SPATA5L1	HSPD1	MRPS34	HSD3B7	SPRR2A	GBP6	GGT5	MDGA1	RRP7A	SUV39H1	GHR	PRPF31	LARP1	NDUFB4	SLC25A34	TNFAIP3
GSE32423_IL7_VS_IL7_IL4_NAIVE_CD8_TCELL_UP	http://www.broadinstitute.org/gsea/msigdb/cards/GSE32423_IL7_VS_IL7_IL4_NAIVE_CD8_TCELL_UP	Sig234	ACVR1	IPCEF1	CYSLTR1	ST6GALNAC5	PRM2	WNK4	B3GNT5	AMIGO2	GGT1	SDR16C5	TBC1D5	TGM3	KIAA1407	C9orf142	ZNF786	COL3A1	TBL2	LFNG	ATP10A	SLC25A18	GNAT1	NOS3	TPTE	PCSK4	SEPW1	PRSS42	KRTAP26-1	RECK	NSUN2	BDH2	NRK	HEBP1	MINA	SLC47A1	KAT2A	TMEM206	SLFNL1	LANCL1	ST3GAL1	FAM123C	PRRT3	RALBP1	CC2D1B	ADAMTSL4	CTSK	MBOAT1	EML1
GSE32423_IL7_VS_IL7_IL4_NAIVE_CD8_TCELL_DN	http://www.broadinstitute.org/gsea/msigdb/cards/GSE32423_IL7_VS_IL7_IL4_NAIVE_CD8_TCELL_DN	Sig235	N4BP2L1	DIS3L	NANOS1	ELF1	TPD52	INO80C	GIMAP1	PLEKHM1	C20orf201	WDR47	MTUS2	USP2	DLX1	C21orf56	EPC2	SLC2A6	PAPSS2	CYFIP2	CPEB4	GALNT7	GPRIN3	YTHDF3	STAT2	MAN1A1	SCAF8	CLIP2	ASB3	BCL2L13	ZNF516	EHHADH	KCNE1L	CBX4	CSGALNACT2	TTC25	PPIP5K2	SKIV2L2	TXNDC15	LATS1	SRSF7	DNAJC7	RSRC2	SLC39A6	RDX	ITM2A	PPTC7	XBP1	GPR179
GSE7460_CTRL_VS_TGFB_TREATED_ACT_CD8_TCELL_UP	http://www.broadinstitute.org/gsea/msigdb/cards/GSE7460_CTRL_VS_TGFB_TREATED_ACT_CD8_TCELL_UP	Sig236	ID2	RCE1	NUPR1	CD70	PLAUR	ANAPC5	XIRP1	DSN1	RIN3	RNPEP	IER3	PDE6C	ARHGAP26	LSM5	CCL24	ANXA1	SMAD3	SIRT3	ADK	DAP3	ATP8B4	CCR2	TRABD	NCKAP5L	C9orf102	RIPK3	RPL26	GUK1	PLXNC1	CORO7	ANO10	HEXIM2	JDP2	LGALS1	KAZN	THOC1	KIFAP3	ATP2B1	SLC41A2	CAMK4	CD44	SAAL1	GGH	FANCB	TFDP1	DAPL1	ZSWIM1
GSE7460_CTRL_VS_TGFB_TREATED_ACT_CD8_TCELL_DN	http://www.broadinstitute.org/gsea/msigdb/cards/GSE7460_CTRL_VS_TGFB_TREATED_ACT_CD8_TCELL_DN	Sig237	SUN2	LITAF	C18orf1	QPRT	GPR15	MGAT4A	B4GALNT4	PLEKHA1	SPECC1	MDGA2	NEO1	NTNG1	RNASE6	CSPG4	SHC3	GNA12	VANGL1	WNT5B	PLEKHM3	QKI	MTMR3	LRIG1	APOA5	ANKH	ZNF740	GPR171	CPD	RC3H2	COG3	FBLN2	CD8A	C3orf80	TGFB3	RANBP6	SPSB1	FNDC3A	AHR	SNRK	TTC17	STX16	RAC3	ADAMTS6	RNF149	TOX	OAS1	NT5E	GCNT1
GSE7460_CD8_TCELL_VS_TREG_ACT_UP	http://www.broadinstitute.org/gsea/msigdb/cards/GSE7460_CD8_TCELL_VS_TREG_ACT_UP	Sig238	PDCD4	IMPAD1	C17orf59	EML5	SESN2	IKZF1	EVL	SYTL3	TMEM91	PAK3	DUSP22	DIO2	LRMP	CNRIP1	ACSS1	NOTCH1	MALT1	CAMK4	DTX1	PLAUR	TTC3	GABBR1	HERC3	MBLAC2	WDR45	NEDD4	CDKN1B	TCF7	ZNF14	CAMK1D	LPXN	ORMDL3	SMAP2	C20orf54	CCDC84	C5orf46	RALGAPA2	ALPL	SIRT3	NISCH	SMYD1	IL1RN	PBXIP1	ZCCHC18	RNF166	PYGM	TMEM66
GSE7460_CD8_TCELL_VS_TREG_ACT_DN	http://www.broadinstitute.org/gsea/msigdb/cards/GSE7460_CD8_TCELL_VS_TREG_ACT_DN	Sig239	TRAT1	FARSB	TRIM44	NUP93	C11orf74	PSMD13	KLHL2	DNAAF2	MRPL40	SPCS3	KIAA1191	FNBP1L	ANLN	ERI1	TIMELESS	EXOC8	NUDT5	VDAC1	PSMD12	DDX1	SOD1	FAM54A	ANKRD28	POLR2B	FUBP3	GPR83	MCM4	KIAA1524	ACSL1	TMX1	TOX	C18orf19	WSB1	MAP3K8	MELK	AKAP11	MED19	NAA10	HSPA14	BUB3	PPM1L	NUP107	STK24	CEP57L1	AGRP	LIMA1	ARHGAP11A
GSE1566_WT_VS_EZH2_KO_LN_TCELL_UP	http://www.broadinstitute.org/gsea/msigdb/cards/GSE1566_WT_VS_EZH2_KO_LN_TCELL_UP	Sig240	ABCD4	ABHD14B	ACCN2	ACCN4	ACN9	ACVR1	ADAM10	ADAMTS17	ADARB1	ADCY10	ADH4	ADM2	AHCYL1	AHSP	AKAP12	AKT1S1	ALDH16A1	ALG8	ALKBH8	AMIGO2	AMTN	AMZ2	ANKH	ANKK1	ANKRD30B	ANXA2P2	APCDD1	APOC1	APOD	ARHGAP33	ARL4A	ARMC7	ARMCX1	ART4	ARV1	ASAP3	ASPRV1	ATG3	ATIC	ATP5J	ATP6V1F	ATPIF1	AZI1	B3GALT2	BAHCC1	BATF2	BHMT
GSE1566_WT_VS_EZH2_KO_LN_TCELL_DN	http://www.broadinstitute.org/gsea/msigdb/cards/GSE1566_WT_VS_EZH2_KO_LN_TCELL_DN	Sig241	NSUN5	ZSCAN12	ZRSR1	ZNF93	ZNF91	ZNF879	ZNF841	ZNF836	ZNF808	ZNF781	ZNF714	ZNF672	ZNF628	ZNF592	ZNF530	ZNF484	ZNF396	ZNF341	ZNF148	ZFP112	ZER1	ZEB2	ZCCHC14	ZBTB34	YTHDC2	YSK4	YIPF5	YAP1	XRN1	XRCC5	WISP2	VWC2L	VTI1A	VPS33B	VANGL1	USP42	USH1G	UPK3B	UG0898H09	UBE2I	TSPAN5	TSPAN13	TSEN2	TRAV8-3	TRAF3	TRA2A	TMPRSS5
GSE8835_HEALTHY_VS_CLL_CD8_TCELL_UP	http://www.broadinstitute.org/gsea/msigdb/cards/GSE8835_HEALTHY_VS_CLL_CD8_TCELL_UP	Sig242	TAS1R1	TFCP2	GYG1	SEC11A	H2AFX	IDH3B	NDRG3	USF2	PKP4	C6orf62	NCOR1	SLC25A6	MBTPS2	PKDREJ	PRC1	ZIK1	CBLN2	C5orf65	STAC2	AP3S1	FAM179B	NAGPA	TSPAN8	MYOF	UBR3	SRXN1	ADAM17	PDXK	NARS2	KLHL6	DEPDC1B	MRPL10	SMC2	TGFB1	NLK	GSDMD	ZNF212	RAB14	C10orf58	PEG3	GTF2H3	TMEM87A	SLC15A4	C4orf46	DHX34	POLK	PCBP2
GSE8835_HEALTHY_VS_CLL_CD8_TCELL_DN	http://www.broadinstitute.org/gsea/msigdb/cards/GSE8835_HEALTHY_VS_CLL_CD8_TCELL_DN	Sig243	SAA4	CXCL6	COL1A2	OMP	CRNKL1	SRPX2	BEX2	TBC1D12	SMOX	RNF114	PTPN2	IL4R	KIAA0368	QPCT	ZFP36L1	SHISA9	RIMKLA	DDO	COL4A1	NPM3	ERRFI1	LRRIQ3	MCFD2	SRGAP1	FCGR2B	RBPJ	ZCRB1	PILRB	SERPINB4	B3GALT2	KDM5B	WHAMM	DNAJC4	MAN1A1	FKBP7	ANKRD12	DECR2	CALB2	SLC27A4	BAMBI	CEP44	CELA2A	TNFAIP2	DTNA	ALDH1L2	MTDH	C5orf13
GSE3720_UNSTIM_VS_LPS_STIM_VD2_GAMMADELTA_TCELL_UP	http://www.broadinstitute.org/gsea/msigdb/cards/GSE3720_UNSTIM_VS_LPS_STIM_VD2_GAMMADELTA_TCELL_UP	Sig244	RPS3	RPL8	MBOAT1	RPS20	PDK1	RPL32	HSH2D	TFAM	FAM134B	HIST4H4	USE1	AGA	CKS2	CD3EAP	GMFG	RPL27	EEF1B2	SLAMF6	RPL30	HOOK1	TRAF1	RPLP0	SPRYD4	IKBKE	RPL3	SIDT1	ITGAX	ZC3H12D	MED12	RPL5	EOMES	RPL22	DUSP6	BRP44	ME2	CD72	MRPL23	MGAT2	RFX7	RPS9	GLTSCR2	TCF7	CCT2	ZNRF1	RPS12	LYST	TMSB10
GSE3720_UNSTIM_VS_LPS_STIM_VD2_GAMMADELTA_TCELL_DN	http://www.broadinstitute.org/gsea/msigdb/cards/GSE3720_UNSTIM_VS_LPS_STIM_VD2_GAMMADELTA_TCELL_DN	Sig245	DPYSL4	KLK4	AQP1	HEMK1	DUSP16	RRBP1	SLC2A6	ST3GAL1	GREM2	FRY	SPINLW1	TNS4	KRT2	CDH10	MUC6	L1CAM	FAM194A	SMTNL2	LHX3	NR1D2	IVL	DPP6	KCNQ1	CCL9	KLRC2	XDH	TTC36	SLAMF1	PER3	RALGAPA2	SMOC1	TSPAN2	STARD10	ANK3	KLHDC8B	ATCAY	BACE2	FCRLB	ITGB2	GABARAPL1	TMEM63C	EXTL1	LGALS3	FXYD6	JPH3	PIEZO1	CROT
GSE3720_UNSTIM_VS_PMA_STIM_VD2_GAMMADELTA_TCELL_UP	http://www.broadinstitute.org/gsea/msigdb/cards/GSE3720_UNSTIM_VS_PMA_STIM_VD2_GAMMADELTA_TCELL_UP	Sig246	EOMES	USE1	MAP3K5	RPS10	REXO2	FAU	RPL36	CAPN11	EEF1B2	DPP4	PDLIM2	CCDC64	EIF5A	PDE2A	COTL1	ACTN1	DKC1	HIST4H4	RPSA	PHF21A	FAM46C	HOOK1	URB1	RPL36A	PDK1	INPP4B	TRIM59	PSME2	CARD10	GLTSCR2	CD3D	DUSP6	RPLP0	TNFRSF18	RALGPS2	RPL29	43714	DGUOK	MAP4K4	PRKCB	BRP44	RPL10A	RPS26	MNS1	BATF	NCOA3	ETNK1
GSE3720_UNSTIM_VS_LPS_STIM_VD1_GAMMADELTA_TCELL_DN	http://www.broadinstitute.org/gsea/msigdb/cards/GSE3720_UNSTIM_VS_LPS_STIM_VD1_GAMMADELTA_TCELL_DN	Sig247	JUP	CAPG	IQCB1	PRDM11	BICD1	PERP	AGTR2	ITM2B	THEG	NCKAP1	BCORL1	EMP3	FIG4	SLAMF1	CROT	LAMB3	DGKH	FAM188A	NPTX2	ARNTL	EXOC2	CDHR1	IRF4	RAP1B	CFLAR	SYPL1	STARD10	PION	RSU1	GFI1B	ZBBX	RAP1GAP2	CCL9	PPAP2A	KLF17	ARL15	ERN1	TRIM46	ADAMTS6	NDFIP2	EPS8	NGB	IL2RA	DUPD1	NCAN	TMPRSS13	KCNJ8
GSE3720_UNSTIM_VS_PMA_STIM_VD1_GAMMADELTA_TCELL_UP	http://www.broadinstitute.org/gsea/msigdb/cards/GSE3720_UNSTIM_VS_PMA_STIM_VD1_GAMMADELTA_TCELL_UP	Sig248	ITGAX	F2RL1	GPATCH1	CRIP1	CAPN11	RBM25	GAS5	TSSC4	ERGIC3	TRAF3IP2	LY6E	TMSB10	RPL22	H2AFV	CD52	BRP44	ODC1	CD8B	CD72	MAD2L1	BOLA2	CXCR3	TH1L	RPL4	EEF1B2	S100A11	SIDT1	EIF3H	SNAPC5	TNFSF8	CREBL2	RPL3	NDUFB9	STXBP2	IKBKE	PTRH2	KLK8	RFXAP	NACA	VHL	MLX	GPC2	CD2	RNF138	XPO6	NDUFB7	BOLA1
GSE3720_UNSTIM_VS_PMA_STIM_VD1_GAMMADELTA_TCELL_DN	http://www.broadinstitute.org/gsea/msigdb/cards/GSE3720_UNSTIM_VS_PMA_STIM_VD1_GAMMADELTA_TCELL_DN	Sig249	ARHGEF12	KCNA5	AQP1	FKBP9	CRISPLD2	DCTN4	IL18RAP	PRKCH	ZZEF1	CYYR1	SCG3	ADAMTS19	KLK4	DGKK	PABPC4	DDIT4L	TASP1	DPY19L1	CDH10	STAU2	LAMC1	KCNA1	LMAN2L	CYP2E1	RTBDN	WEE1	RBL1	PLSCR2	ZSCAN5B	MAGED1	SMOC1	TUG1	HOXC4	EPS15	HAVCR2	NCKAP1L	ANGPT2	AP1S1	MIR34A	MCPH1	GTF2A1	PLDN	TBX4	RALGAPA2	LRRTM4	ANKS3	CBR3
GSE3720_LPS_VS_PMA_STIM_VD1_GAMMADELTA_TCELL_DN	http://www.broadinstitute.org/gsea/msigdb/cards/GSE3720_LPS_VS_PMA_STIM_VD1_GAMMADELTA_TCELL_DN	Sig250	AIP	DPP4	KLF13	EPS8L1	FZD1	LEPROTL1	GPSM3	BRP44	RNASEH2C	LYST	FILIP1L	NDUFV3	TRAF3IP2	PPDPF	RPSA	GPR65	FAU	RPL4	PSME1	RPL10A	ITGAX	GRAMD3	LY6E	GPR114	GPR183	RPS26	COX5A	NAA30	LSM4	PDLIM2	RCN3	SGMS1	WDR43	CNP	IFI30	RPL29	H2AFV	PSMG1	SLAIN2	CXCR3	RPS14	VAMP7	MRPL2	MAP3K5	TNFSF8	EVL	TRMT112
GSE3720_LPS_VS_PMA_STIM_VD2_GAMMADELTA_TCELL_UP	http://www.broadinstitute.org/gsea/msigdb/cards/GSE3720_LPS_VS_PMA_STIM_VD2_GAMMADELTA_TCELL_UP	Sig251	AGTR2	TXNDC8	IL18RAP	HEXIM1	XRN1	ARHGEF12	NCKAP1	HAVCR2	MC4R	CDHR1	CHIT1	LRRC3B	GPR171	SPN	GZMA	FAM69B	CDK2	TMEM120B	ZEB2	CYP7A1	STARD10	TLE2	DGKH	GABBR1	ICA1L	CLOCK	MCTP2	THEMIS	SLC5A3	ATP8B4	TAF9B	MYSM1	PTPN4	CUL3	TMPRSS13	PNLIP	GNGT1	TMEM87B	FAM71D	NEBL	RPL39L	LYRM4	SNAPC3	ARNTL	FOXN3	ANXA1	TMEM57
GSE3720_LPS_VS_PMA_STIM_VD2_GAMMADELTA_TCELL_DN	http://www.broadinstitute.org/gsea/msigdb/cards/GSE3720_LPS_VS_PMA_STIM_VD2_GAMMADELTA_TCELL_DN	Sig252	ADAMTS19	SHC4	TM4SF5	SASH1	ATL2	EOMES	NFU1	KIF11	LYST	SOD3	KLK4	CBR3	NKX2-5	NLGN1	RPS14	FKBP9	AMPD3	MMP24	TRIM10	PANK4	SIDT1	ACOT7	LY6K	SATB1	LGSN	ATP6V1B2	ANAPC11	GAS6	LMAN2L	NLRP5	HDAC8	GBGT1	KLHDC8B	RFC1	AKAP3	BDNF	CXCR3	UTP23	PANX1	AK7	EFHC2	MAF	43719	PHC1	NXPH1	PRKX	SLCO1C1
GSE3720_LPS_VS_PMA_STIM_VD1_GAMMADELTA_TCELL_UP	http://www.broadinstitute.org/gsea/msigdb/cards/GSE3720_LPS_VS_PMA_STIM_VD1_GAMMADELTA_TCELL_UP	Sig253	ARF6	FBLN1	NIPBL	RDM1	KLRC2	XAF1	GSDMD	GZMB	GPC2	CREBL2	NIPAL4	PRAM1	KLRD1	MORN3	SLC33A1	AZI2	ZEB2	TOMM20	AGPAT2	MAD2L1	FAM171B	PDCL2	SRF	PPP3CC	RNF138	SLC50A1	SMN1	KCNJ8	CRLS1	GABARAPL1	FGL2	ZMYM5	TH1L	MBD3L2	CENPQ	CAPN11	TPCN2	RPAP2	UBXN11	NGB	ACYP2	RNFT1	GZMA	MC4R	LIN9	NCKAP1	S100A4
GSE3720_UNSTIM_VS_PMA_STIM_VD2_GAMMADELTA_TCELL_DN	http://www.broadinstitute.org/gsea/msigdb/cards/GSE3720_UNSTIM_VS_PMA_STIM_VD2_GAMMADELTA_TCELL_DN	Sig254	USP14	PHGDH	CD97	OSBPL3	ROD1	ABCC6	MB21D1	FOSL2	SLC43A3	CAPN2	ATP5B	TUBGCP2	PPP3CC	C22orf13	EBP	RASL11B	TWF2	SIRT2	PTMS	ZFHX3	ZCCHC18	MFSD1	RFTN1	H2AFY	KRTCAP2	SGK223	FAM129A	ALG5	PRIM1	NR3C1	CENPE	PRR11	ESYT1	ZC3H7A	OSBPL5	HK2	HRSP12	TENC1	IDH3B	ARMC7	NUSAP1	LGALS1	ATAD1	VAMP3	ILDR1	TSNAX	ACOXL
GSE3720_VD1_VS_VD2_GAMMADELTA_TCELL_WITH_LPS_STIM_UP	http://www.broadinstitute.org/gsea/msigdb/cards/GSE3720_VD1_VS_VD2_GAMMADELTA_TCELL_WITH_LPS_STIM_UP	Sig255	RPS8	TNRC6B	SEC63	TBCE	MBOAT7	GLRB	FAM73A	EZH1	ZMYND8	TBC1D4	FLJ45079	ACCN3	PARP3	ANKRD12	ERAP1	SESTD1	TRPM6	ESCO1	GGA2	ACSL3	EID1	ZDHHC24	KIAA1370	C5orf42	REEP3	SLC6A6	RPA1	PHF20	ZNF839	NDUFAF4	LOC550643	ARMCX2	PPA2	FYB	C20orf196	FGF13	ICOS	PLXNA3	PKP4	RAPGEF1	DICER1	ZEB1	NUDT6	CACYBP	CDK17	SYT11	GPR172A
GSE3720_VD1_VS_VD2_GAMMADELTA_TCELL_WITH_LPS_STIM_DN	http://www.broadinstitute.org/gsea/msigdb/cards/GSE3720_VD1_VS_VD2_GAMMADELTA_TCELL_WITH_LPS_STIM_DN	Sig256	IKZF1	SPRY2	CD164L2	DNAJB4	LGALS8	OSBPL3	RG9MTD3	SGK3	KIF23	TRAM1	FAM129A	PAG1	TREX1	FAM204A	PKMYT1	CERS5	EBP	TACC3	ATL2	LAIR1	PPP3CC	KDM4A	NPC2	AKTIP	FCGR2B	DIAPH3	SNAI3	GNA11	GSR	SUPT4H1	EMP3	ALKBH7	TTC39C	MEGF9	ZNF394	ANUBL1	PLEKHF1	PRR24	STMN1	PNLIPRP2	CDC42SE1	CEP55	SLC20A1	C2orf76	GPSM2	TECPR1	CAPN2
GSE3720_VD1_VS_VD2_GAMMADELTA_TCELL_WITH_PMA_STIM_UP	http://www.broadinstitute.org/gsea/msigdb/cards/GSE3720_VD1_VS_VD2_GAMMADELTA_TCELL_WITH_PMA_STIM_UP	Sig257	PLEKHG2	IFT74	CREG2	ZMYND8	AP3B1	GALNTL4	FAM73A	SNAPC1	ERLIN1	ZEB1	ADIPOR2	SLC26A11	FLJ45079	PDK1	ITK	EGR3	SLC9B2	MYO1C	MRPS25	ACSL3	C8orf37	TIMM8B	C3	ADARB1	HHAT	PLXNA3	CACYBP	ISOC1	CHML	UBE2S	SLC25A4	HPCAL1	SIX5	CDK17	BEND3	IWS1	TMEM131	TBC1D4	NELF	PROC	KIAA0247	IKBKE	HLA-DMB	GAD1	PPCS	AGT	NME1
GSE3720_UNSTIM_VS_LPS_STIM_VD1_GAMMADELTA_TCELL_UP	http://www.broadinstitute.org/gsea/msigdb/cards/GSE3720_UNSTIM_VS_LPS_STIM_VD1_GAMMADELTA_TCELL_UP	Sig258	ATAD1	DCUN1D2	DKKL1	SLC20A1	GRB10	C7orf64	MYO3A	TBX21	IL18RAP	CD97	CDC20B	TAF8	MOSC2	TUBGCP3	C12orf49	AKTIP	GSK3B	DYNC1H1	MIDN	PRRT1	RUNX3	GMFG	CSRP2BP	C8orf42	C5orf30	ESYT1	PGS1	PNLIPRP2	FAM65B	FLI1	ZNF213	L1CAM	FAM76B	C14orf1	CNOT6L	CREBZF	TMCO3	TRAPPC8	CHSY1	HS3ST3B1	SCML4	SEMA4A	CRIP2	TXNIP	TEX264	VPS28	SLC17A9
GSE3720_VD1_VS_VD2_GAMMADELTA_TCELL_DN	http://www.broadinstitute.org/gsea/msigdb/cards/GSE3720_VD1_VS_VD2_GAMMADELTA_TCELL_DN	Sig259	ECE1	VCP	PPP1R36	MAT2A	ZNF518B	CDK5R1	SRSF7	DCLK1	TMEM165	TACC3	FLJ45079	ALDOC	METTL21D	SCCPDH	C3orf37	C7orf45	NHP2	PLEKHH2	OXSR1	KHDRBS3	POU2AF1	B3GNT2	UFSP1	IKZF4	PTPN11	ADCY5	SORBS3	SLC36A4	CD83	TIMM8B	PTMS	PPM1G	CFB	EGLN3	SLC30A3	SP6	MIF	FAM71B	HSBP1	RUFY3	CSNK2B	UBE2L3	STX4	PSD	IL1RN	CCDC58	TRPM6
GSE3720_VD1_VS_VD2_GAMMADELTA_TCELL_WITH_PMA_STIM_DN	http://www.broadinstitute.org/gsea/msigdb/cards/GSE3720_VD1_VS_VD2_GAMMADELTA_TCELL_WITH_PMA_STIM_DN	Sig260	SMOX	TECPR1	TMBIM1	CHD2	FAM59A	RAD51B	ATF5	KLC2	C20orf43	HAGHL	VPS28	MUTED	DNAJB5	TMEM175	CCDC61	PXK	SOX15	SYT16	PLIN3	SLC15A1	HSD17B10	BOD1	FAM160B1	SH3BP5	FBXO6	GM2A	SLC25A38	ZMYM2	PI4K2A	ALDH1B1	RFXANK	TEP1	RBMS2	NMNAT1	STX16	HMBOX1	ZNF217	PJA1	DNAJB14	APOC4	RPL4	C12orf51	NAGK	SLC17A7	MNAT1	LRRC20	ANXA13
GSE3720_VD1_VS_VD2_GAMMADELTA_TCELL_UP	http://www.broadinstitute.org/gsea/msigdb/cards/GSE3720_VD1_VS_VD2_GAMMADELTA_TCELL_UP	Sig261	WNT1	NOB1	SEC11A	DNAJC9	PHRF1	CYB561D2	MRPL11	TRIM37	C14orf169	CTPS	FITM2	C1orf68	OTUD6B	POLE	EPB41L4A	RANBP1	KLK11	TIMM13	GEMIN6	UGT2B4	HSPA5	MYCN	MAK16	RTP4	PMS1	DHX37	BANF1	RNF213	KLK10	WARS	EXO1	EPS8L2	TBX1	RAB30	BAZ1B	LSM3	MRPS18A	CXCL10	CADPS2	CDK7	GABRR2	IL36G	MB21D1	DHFR	PPP1R8	SNF8	CLP1
GSE3039_ALPHAALPHA_VS_ALPHABETA_CD8_TCELL_DN	http://www.broadinstitute.org/gsea/msigdb/cards/GSE3039_ALPHAALPHA_VS_ALPHABETA_CD8_TCELL_DN	Sig262	HEMGN	AHSP	DBNL	FAM176A	GP2	CA1	SNX31	ARHGAP39	PRG3	HEG1	TRIM7	GLCCI1	MYCL1	S1PR5	PTPRC	FCN1	TESC	43714	CD7	CHMP1B	FAM109B	FLT3	STAB2	TMCC2	CD79A	ABCA3	COCH	AP1S3	UBAC2	AKAP10	ADRB1	CXCR5	MARCO	PTGER3	ZBTB9	NCR1	SUOX	VSTM4	MZB1	ALDH1A1	PSIP1	IL5RA	SFI1	ROGDI	CD4	RAPGEF1	PIP4K2A
GSE3039_ALPHAALPHA_VS_ALPHABETA_CD8_TCELL_UP	http://www.broadinstitute.org/gsea/msigdb/cards/GSE3039_ALPHAALPHA_VS_ALPHABETA_CD8_TCELL_UP	Sig263	PRELID1	NDUFS5	IKBKE	FAM84B	SNRPF	LXN	FCGR2B	VPRBP	C7orf58	PSMD3	VPS53	AP2M1	CXCL3	IL6	SDC4	ELK3	SLC2A1	PTGR1	VDR	UTP18	IER3	GPI	RAB11A	PHLDA1	F11R	MAFF	THAP4	PRPF31	TMEM214	FAM129B	GTF2F1	OSM	DIP2A	MRPS36	DAB2	AP2S1	MRTO4	TATDN2	C22orf32	PLXDC2	EPS8	WBP5	CCDC86	ETS2	IGFBP6	UCK2	PTPLA
GSE5142_CTRL_VS_HTERT_TRANSDUCED_CD8_TCELL_EARLY_PASSAGE_CLONE_UP	http://www.broadinstitute.org/gsea/msigdb/cards/GSE5142_CTRL_VS_HTERT_TRANSDUCED_CD8_TCELL_EARLY_PASSAGE_CLONE_UP	Sig264	PANK1	NSMAF	CASP4	IFNAR2	SNW1	WLS	YTHDC1	SYTL2	LTBP3	ZC3H7B	RABGAP1L	MYO5A	BRD9	C17orf76	ZNF281	LARS2	SCLY	TUBB2B	SEC11C	ZNF827	DDX17	VMP1	ACBD5	FAM176B	CD6	ICK	AGRN	RBM10	ARHGEF3	MSH6	ZDHHC20	TUBGCP4	EEA1	RAB19	RAB11FIP2	SMC4	MXD4	GKAP1	DEK	SHISA5	CDIPT	WASL	TEX10	GGNBP2	KIF5C	EIF2B2	RGS1
GSE5142_CTRL_VS_HTERT_TRANSDUCED_CD8_TCELL_EARLY_PASSAGE_CLONE_DN	http://www.broadinstitute.org/gsea/msigdb/cards/GSE5142_CTRL_VS_HTERT_TRANSDUCED_CD8_TCELL_EARLY_PASSAGE_CLONE_DN	Sig265	PIK3CD	RAB20	TSPAN14	GPATCH4	ARHGAP29	LIMS3L	ZADH2	GRAMD3	RGMB	PTPRA	CHD4	APP	LHFPL2	TTC7B	PDCD7	CHP	C5orf28	RPSA	OAS2	FAM101B	ZNF575	NACC1	SERPINA3	OXCT1	ABCC5	STMN1	IL7R	RSU1	TM9SF4	SNX15	ATP8B4	THEMIS	CALCRL	CLYBL	CADM3	METTL9	TXK	SDHC	ADARB1	KLHL15	MED18	ITPR1	PCBP2	IGFBP4	DPYSL4	XKR5	ARV1
GSE5142_HTERT_TRANSDUCED_VS_CTRL_CD8_TCELL_LATE_PASSAGE_CLONE_UP	http://www.broadinstitute.org/gsea/msigdb/cards/GSE5142_HTERT_TRANSDUCED_VS_CTRL_CD8_TCELL_LATE_PASSAGE_CLONE_UP	Sig266	TOP2A	LMAN1	C11orf82	CASP1	HIRIP3	LMNB2	TBC1D19	SNRPB2	KATNB1	SMYD2	DMWD	BRCA2	TTF2	MRPL27	ZNHIT1	KIF18B	NUDCD2	ITGB3BP	SERPINB9	PDSS1	SAMSN1	MCM8	POLA1	PPAP2A	POLR2I	TAMM41	SEC61G	ZNF296	LSM3	APIP	CXorf21	DSN1	E2F8	TBCD	NDUFA10	MASTL	E2F2	FKBP5	ARHGAP21	LSMD1	DKC1	TYMS	CENPL	RAD54B	GMNN	C16orf61	DTYMK
GSE5142_HTERT_TRANSDUCED_VS_CTRL_CD8_TCELL_LATE_PASSAGE_CLONE_DN	http://www.broadinstitute.org/gsea/msigdb/cards/GSE5142_HTERT_TRANSDUCED_VS_CTRL_CD8_TCELL_LATE_PASSAGE_CLONE_DN	Sig267	LEF1	THRA	TRIO	ARRB1	TCTA	MAN1C1	UBE2J1	RICTOR	BACH1	WIPF2	SLC36A1	ELAC1	RSU1	CAMK1D	PTTG1	SLC25A35	SMAD7	VWCE	GCLC	PDE7A	TBC1D30	C17orf28	ABHD15	TSC22D3	ETS1	OTUD1	ITPKB	CRY2	TTC28	RFX3	INPP5A	GALNT2	GALNT9	SERTAD2	CSNK1E	PDE4DIP	MKRN1	TES	FRMD6	KRAS	PHF23	CASC3	PTTG1IP	GLG1	TTYH2	IER5	FUK
GSE13173_UNTREATED_VS_IL12_TREATED_ACT_CD8_TCELL_UP	http://www.broadinstitute.org/gsea/msigdb/cards/GSE13173_UNTREATED_VS_IL12_TREATED_ACT_CD8_TCELL_UP	Sig268	RTN1	ARHGDIB	SPRR4	ADAMTS4	EPHA6	HOXA7	ZBTB8OS	UNC5B	PCDHB7	EMX1	FBXO43	CHST1	TIFA	ANTXRL	PRDM16	FAIM2	DPH2	FEM1A	RFX4	LEFTY1	NPHP4	HSPB1	H6PD	GNG8	IGDCC4	HDGFL1	RPS9	VMAC	KCNK1	EBF2	SCTR	TPH2	MOXD1	PAQR9	SNCA	SPHK1	DUSP28	CLEC11A	ADAMTS16	CXCL14	LRRC7	ADRA1D	NLGN3	PLA2G16	KRTAP4-6	ADAMTS7	HHIPL1
GSE13173_UNTREATED_VS_IL12_TREATED_ACT_CD8_TCELL_DN	http://www.broadinstitute.org/gsea/msigdb/cards/GSE13173_UNTREATED_VS_IL12_TREATED_ACT_CD8_TCELL_DN	Sig269	TPTE	CUL2	CCDC70	FANCM	CEP192	CCDC122	HAUS6	GPR34	PTGER2	PCGF6	UHRF1BP1L	RIBC1	USP46	MDM2	PPP1R15B	TNPO3	ORC2	NPEPPS	GRINA	SAMSN1	VNN1	LARP4	MIS12	ASZ1	MPHOSPH10	PLS3	RAD50	UBE2Q2	GNL2	GOLGA7	SCN7A	KPTN	CEP170	FOLR2	CX3CR1	PDE4DIP	DNM1L	HELQ	SESTD1	GSPT2	EEF2K	FAF2	SLC33A1	RNF115	PTPLB	CYSLTR2	TERF2IP
GSE14699_NAIVE_VS_ACT_CD8_TCELL_UP	http://www.broadinstitute.org/gsea/msigdb/cards/GSE14699_NAIVE_VS_ACT_CD8_TCELL_UP	Sig270	ORMDL2	JDP2	SLC2A3	WDR41	CCL5	EBI3	CREG1	ODC1	SLC35F2	LRIG1	MCART6	CAPN3	CXCR3	CXCR5	APOBR	TBC1D5	S100A10	ETV5	CKLF	CD79B	GSTO1	ZCCHC18	SUPT7L	SH3BGRL2	TSPAN3	GABARAPL1	TGM2	LOC728392	RWDD2A	P4HA1	SYNPO	TIAM1	FAM156A	PLSCR1	AKR1B10	FAM129A	ITGAE	PENK	SERPINB9	PRNP	S100A6	CST7	CSF1	ALDOC	AXL	PGLYRP1	EBPL
GSE14699_NAIVE_VS_DELETIONAL_TOLERANCE_CD8_TCELL_DN	http://www.broadinstitute.org/gsea/msigdb/cards/GSE14699_NAIVE_VS_DELETIONAL_TOLERANCE_CD8_TCELL_DN	Sig271	DUSP6	AQP3	LEF1	RSAD2	DENND2D	IL21	SOX4	O3FAR1	TGFBR3	CCL20	PLAC8	VDR	EHD3	SLC20A1	THEMIS	DAPL1	PDLIM4	MFSD4	XIST	RNF144A	IL4	C8orf42	CNGA2	SV2C	LYPD6B	FAM20A	FOXP3	LETM2	EMP1	IL17A	SATB1	PDE3B	ANGPTL2	MYO6	POU2AF1	ARL4C	IFIT3	AQR	LMO4	TCF7	METTL9	MX2	PARP9	VIPR1	SLC16A5	RORC	H2AFY
GSE14699_NAIVE_VS_DELETIONAL_TOLERANCE_CD8_TCELL_UP	http://www.broadinstitute.org/gsea/msigdb/cards/GSE14699_NAIVE_VS_DELETIONAL_TOLERANCE_CD8_TCELL_UP	Sig272	SH3BP5	KDM5B	RAB3IP	AFP	SLC17A9	ANGPTL1	PPP1R13B	LRRC23	SYNE1	CNGA1	PDK1	ARHGAP15	CD226	CCR9	BTBD11	SMAD7	AMPD1	TNRC6C	CCND2	INADL	XKRX	IL27RA	KBTBD11	MFHAS1	SIDT1	APPL2	PPM1H	MYC	LEF1	CNTNAP3	CCR7	GRK1	ITGAE	RNF167	SLC12A7	EFHA2	INPP4B	ADAMTS6	LDLRAP1	FBXO32	TTC3	SLC43A2	TDRKH	CD55	CRIM1	MAPK8IP3	SCML4
GSE14699_DELETIONAL_TOLERANCE_VS_ACTIVATED_CD8_TCELL_DN	http://www.broadinstitute.org/gsea/msigdb/cards/GSE14699_DELETIONAL_TOLERANCE_VS_ACTIVATED_CD8_TCELL_DN	Sig273	NME1	GABARAPL1	PGAM1	CALM1	GCNT1	DPAGT1	RANBP1	GPR160	CHST11	PRIM2	SEPHS2	PSMC3IP	SERPINE2	IL1B	CDK2AP1	CD48	EPAS1	ORC6	AFG3L1P	LAMP2	IRAK3	HIST1H4H	DDX39A	NUDT1	UBE2S	INSL6	TAF12	AIF1	PHF11	HMGN2	PBK	ACOT7	TBCB	VDAC3	CCDC34	ACADL	SIVA1	SNRPA1	FKBP2	GRB7	LSM3	PSMA1	EME1	ITSN1	HPRT1	MYL4	CISD1
GSE14699_NAIVE_VS_ACT_CD8_TCELL_DN	http://www.broadinstitute.org/gsea/msigdb/cards/GSE14699_NAIVE_VS_ACT_CD8_TCELL_DN	Sig274	SH3BP5	SLC25A36	METTL8	SESN1	TNFSF8	DPH5	TREML2	SLC12A7	SIDT1	KBTBD11	PARP6	APPL2	RAB3IP	CCR9	DIRC2	IFNGR2	CCND2	MDC1	KLHDC2	PLEKHA1	CD55	FAM78A	NOMO1	ITM2A	GPATCH4	LDLRAP1	PDK1	TDGF1	SLC6A19	LEF1	TDRKH	TET1	BTLA	RALGPS2	TTC3	PIK3C2A	SCML4	CNGA1	RREB1	MPP5	RPL36A	SLC11A2	FOXP1	LRCH3	SSBP2	ANGPTL1	NUMB
GSE14699_DELETIONAL_TOLERANCE_VS_ACTIVATED_CD8_TCELL_UP	http://www.broadinstitute.org/gsea/msigdb/cards/GSE14699_DELETIONAL_TOLERANCE_VS_ACTIVATED_CD8_TCELL_UP	Sig275	MYADM	HIP1	SNX10	USH2A	SYPL1	RBM47	ASRGL1	MCM4	STARD10	EHBP1L1	CXCR6	LAIR1	RAP1B	PTGR1	COBLL1	ATG5	FAM129A	GABARAPL1	PRDM1	ATF6	ARHGAP18	LAMC1	HPRT1	ITGAL	CTSD	RAP2A	ZEB2	LPIN2	PTPN12	S100A11	KLRC2	MYL4	IL1RL1	NCALD	DDX28	HTATIP2	TBX21	GABARAPL2	ANXA1	ACOT7	ARF6	REEP5	SLC25A24	HMGN2	PHACTR2	L1CAM	CD38
GSE13946_CTRL_VS_DSS_COLITIS_GD_TCELL_FROM_COLON_DN	http://www.broadinstitute.org/gsea/msigdb/cards/GSE13946_CTRL_VS_DSS_COLITIS_GD_TCELL_FROM_COLON_DN	Sig276	NIPAL1	METTL8	SESN1	DKC1	GGT1	TET1	RAB3IP	EPHX1	DCAF6	ANGPTL1	INADL	PLEKHA1	SEMA4B	LPHN2	QSER1	CEP97	TREML2	PDK1	DIRC2	GPR114	STAT1	SMAD1	USP28	PPAPDC1B	TDRKH	LDLRAP1	EGR2	MGST2	RAPGEF4	SLC6A19	SLFN5	DIEXF	SELL	BRCA2	RGS10	PDLIM1	TLR1	SI	CD2AP	ABCA1	BTLA	NEDD4L	N4BP2	CCR9	INPP4B	E2F6	AIM2
GSE13946_CTRL_VS_DSS_COLITIS_GD_TCELL_FROM_COLON_UP	http://www.broadinstitute.org/gsea/msigdb/cards/GSE13946_CTRL_VS_DSS_COLITIS_GD_TCELL_FROM_COLON_UP	Sig277	PHF11	SMNDC1	SYPL1	MPHOSPH6	STARD10	FTH1	ASRGL1	SRGN	PTTG1	DDX28	NPTN	MYADM	MICAL1	REEP5	KLRC2	HIST1H2BC	SYT7	CHSY1	SDF2L1	PRF1	AIF1	PRKX	SNX10	ABHD5	CHCHD2	COQ10B	SCRN3	RGS1	CD38	NDUFA1	ATF6	RBM47	SNX5	COBLL1	ZYX	RAP2A	ATG5	COX8A	FAM129A	NCALD	BSPRY	PRDM1	ARHGAP18	CYSLTR2	HIP1	ALCAM	ANXA4
GSE17812_WT_VS_THPOK_KO_MEMORY_CD8_TCELL_DN	http://www.broadinstitute.org/gsea/msigdb/cards/GSE17812_WT_VS_THPOK_KO_MEMORY_CD8_TCELL_DN	Sig278	PTK2	APITD1	WDR41	UGDH	FIGNL1	ID2	WHSC1	FAR1	TRIM36	KCNE3	LANCL2	SLBP	TRIT1	FCGRT	KRT80	TYMS	ZNF516	CXCL10	SMC2	PRKCB	TOPBP1	SEMA4D	DLGAP5	DIAPH2	NFKBIE	NAGPA	DEK	ANP32E	IFT172	MYO1H	TMEM8A	ESCO2	ATPIF1	SPC25	UBE2E3	RASGRP3	NCAPG2	RCAN1	TSPAN31	CHTF18	EEPD1	FAM190A	AURKB	LPCAT2	SERINC3	NPC1	RNF149
GSE17812_WT_VS_THPOK_KO_MEMORY_CD8_TCELL_UP	http://www.broadinstitute.org/gsea/msigdb/cards/GSE17812_WT_VS_THPOK_KO_MEMORY_CD8_TCELL_UP	Sig279	MTFR1	CCS	GBP7	LGR4	GOLM1	RPL37A	PRKCZ	C17orf48	PRMT2	EXOC6B	INADL	NLK	BCL9L	EOMES	FAM3C	ICAM2	ALDH6A1	S100A13	RAB23	INPP1	PARD6G	STAMBPL1	RAPGEF6	RAC2	OXR1	RPL13A	NOP10	PSTK	PGK1	GBP2	TEX264	TNFSF10	BOLA2	APBB3	UBXN6	ELOVL6	FRMD8	GUCA1B	POU6F1	FAM65B	CHCHD10	ARHGAP29	XKRX	SLC20A1	CEP97	KCNAB2	RPS2
GSE19198_CTRL_VS_IL21_TREATED_TCELL_6H_UP	http://www.broadinstitute.org/gsea/msigdb/cards/GSE19198_CTRL_VS_IL21_TREATED_TCELL_6H_UP	Sig280	DCTPP1	PRDX4	PPP2R4	NRP2	CUL9	XPO6	IFITM3	EMB	DAGLA	TRIM32	IL2RG	SLC46A3	RBPJ	C17orf96	MIF	HN1L	C17orf90	OGDH	BLVRA	BIRC3	TRERF1	CAPNS1	BLVRB	ANKS1A	EHD4	TTYH2	LRRC33	LRRC25	IFITM2	RAB33A	CSF2RB	NAIP	METRNL	ITSN1	CBR3	CCT3	HLX	C6orf108	RNF125	RCSD1	TSPAN4	LILRB2	BZW2	FCER2	MRPL15	FIS1	SNX6
GSE19198_CTRL_VS_IL21_TREATED_TCELL_1H_DN	http://www.broadinstitute.org/gsea/msigdb/cards/GSE19198_CTRL_VS_IL21_TREATED_TCELL_1H_DN	Sig281	SLC8A1	TLE3	DYX1C1	CPD	DNAL4	DNASE2	SOCS6	MOAP1	FAM82A2	LTA4H	MAPK9	C12orf59	AZI2	CYP19A1	MMP2	SLC7A7	LDLRAD3	ZMIZ1	TFEB	PMEPA1	PSME4	SLC31A2	CD58	ZMYM6	S100A10	PLOD2	OLR1	ATP6V0E1	IL18R1	GBE1	SLCO2B1	ELL2	ANXA5	VSIG10L	NCOA4	PDLIM7	P2RY11	GPR157	GRB2	SNTB1	MAP3K2	CKLF	CEP170	SLC16A6	OLFML3	GPR108	KCNK13
GSE19198_1H_VS_6H_IL21_TREATED_TCELL_UP	http://www.broadinstitute.org/gsea/msigdb/cards/GSE19198_1H_VS_6H_IL21_TREATED_TCELL_UP	Sig282	FAT2	NRCAM	ABCA9	SLC12A5	ULK2	MYBPH	NKX6-2	LOC100129112	LOC400768	OR5H1	LOC439938	CELF2	PLIN1	C15orf56	TBC1D30	B3GAT1	SCGB1A1	TGFA	SERPINB5	GFM1	DKFZP564C196	WDR81	C10orf122	SGK1	OGN	ANKRD36BP2	ZNF43	C12orf75	LINC00163	KLHDC8A	SLC5A2	WDFY3-AS2	GPR52	SULF2	STAG3	CARNS1	FEM1C	GCGR	RIMS3	ALAS2	HOTTIP	SAMSN1	LOC653602	CFP	HS3ST2	GADD45A	BIK
GSE19198_CTRL_VS_IL21_TREATED_TCELL_1H_UP	http://www.broadinstitute.org/gsea/msigdb/cards/GSE19198_CTRL_VS_IL21_TREATED_TCELL_1H_UP	Sig283	ID2B	APOC1	LOC646576	LOC100131691	TTF1	LOC151658	GPR137C	PADI2	SKI	ABCG5	ID3	MLK7-AS1	CCDC120	SH3BP4	C1orf49	ALOX5AP	HAMP	SPIN4	CHMP4C	CDH2	C12orf56	MTHFD1L	USP11	SLFNL1	SYCP2	FAM82A2	ZNF440	DEFT1P	KIAA1147	C15orf52	KLHL4	HBEGF	C22orf42	ZSCAN2	SLC6A4	LOC100131496	MAGI1	CEBPA	LRRC39	LOC100130353	KLRC4	ALDH2	VSIG10	HRC	PCNXL2	CA13	TMEM100
GSE19198_6H_VS_24H_IL21_TREATED_TCELL_UP	http://www.broadinstitute.org/gsea/msigdb/cards/GSE19198_6H_VS_24H_IL21_TREATED_TCELL_UP	Sig284	SPINK1	OLR1	RAP1GAP	SH2D3C	C18orf32	DNAJC5B	TOR3A	PLCB1	APOL3	PPP1R14A	MGST1	CD40	ITGA6	ITGAL	LOC100288617	C19orf10	HSD11B1	FOLR3	ALDH5A1	KCNAB1	SLC29A3	AKR1C3	ATP6V0D2	SLC25A35	FGD5	NCF2	NDUFB9	PLEK	ANXA11	BCL11A	SLC27A3	HLA-G	SLC9A7	ISOC1	SGCB	LPCAT4	PLCD1	SFT2D2	LMLN	GUCY1B3	TMEM85	LY75	TMEM91	MGC39372	SLC7A11	BTG3	LGALS2
GSE19198_6H_VS_24H_IL21_TREATED_TCELL_DN	http://www.broadinstitute.org/gsea/msigdb/cards/GSE19198_6H_VS_24H_IL21_TREATED_TCELL_DN	Sig285	AHCY	FER	TFCP2L1	OLFML2B	CEBPD	TMEM37	TBC1D14	NAIF1	SAP30	HN1L	ARL8A	TRIM32	MS4A6E	MYO7A	SDC3	AFF1	RGL1	MPP1	DIP2B	VSIG4	CCL26	TPD52L2	LILRB5	PIK3IP1	KLHL12	PRKCE	JMJD1C	FAM91A1	JHDM1D	TRIM37	DUSP3	TMEM55B	LARP4	DAAM2	CORO7	KIAA0146	SNTB2	MST4	ADORA3	TNS1	ITPKC	PREX1	PMP22	H2AFY	ARID5B	SNCA	CRYL1
GSE19198_CTRL_VS_IL21_TREATED_TCELL_6H_DN	http://www.broadinstitute.org/gsea/msigdb/cards/GSE19198_CTRL_VS_IL21_TREATED_TCELL_6H_DN	Sig286	PELI1	NUPR1	SNX1	PLOD2	H2AFY	YTHDF3	AMIGO2	GTF2IRD1	GAB3	SOCS6	BIN2	USF2	MERTK	FRAT1	SH3PXD2B	FKBP5	FCGR3B	TRIM37	FLJ12120	ELL2	RNF168	CSNK2A2	IL10	ZFYVE21	ARL8A	SNTB2	RHOBTB1	ADAM9	RALGDS	PITHD1	C2	TBC1D14	DDX24	SNCA	SSH2	TPST1	C1orf85	GBGT1	MST4	MFSD1	SDCCAG3	FLOT1	LDLRAD3	FMN1	MAML2	PIK3C2A	LOC440104
GSE19198_1H_VS_24H_IL21_TREATED_TCELL_DN	http://www.broadinstitute.org/gsea/msigdb/cards/GSE19198_1H_VS_24H_IL21_TREATED_TCELL_DN	Sig287	TSPAN33	LOC100132891	DNAJC5B	DNAJC4	IL2RG	CCR7	C1orf54	XPO6	SEMA7A	TTYH2	PAPSS1	LRRC33	SRGN	TOR3A	LY75	UBA7	ANO10	PEA15	IFIH1	PPARGC1B	AMICA1	FAS	ZBTB46	ALG8	MYCL1	APOL3	HSD11B1	SNAP23	CD48	CSF2RB	PLEK	BID	PHPT1	LY9	NCF2	FAM69A	C1orf115	SLC2A6	WDR74	LOC644090	GSTK1	NFAM1	SRD5A3	BCAR3	CD44	RASGRP1	ANXA11
GSE19198_CTRL_VS_IL21_TREATED_TCELL_24H_DN	http://www.broadinstitute.org/gsea/msigdb/cards/GSE19198_CTRL_VS_IL21_TREATED_TCELL_24H_DN	Sig288	IL11RA	MCFD2	MEF2D	FAM193B	TNK2	MSH2	TNFRSF17	TPRG1L	NCOR1	GSTM5	CCR9	EVI2B	APOBR	AP1G2	MTSS1	SLC48A1	CNTLN	NT5C	HDAC5	PPARG	ADIPOR2	LMO2	ANKMY2	S1PR5	PTPRS	AES	TMEM71	AK1	DEPTOR	FBXL8	C7orf59	ROMO1	SREBF2	MAPK11	KIF1C	PAPSS1	SNRNP25	PCYOX1	ATP1B1	C4orf34	RPS6KA1	GPI	MXD4	SPTBN1	LDB1	ULK1	SIAE
GSE19198_1H_VS_6H_IL21_TREATED_TCELL_DN	http://www.broadinstitute.org/gsea/msigdb/cards/GSE19198_1H_VS_6H_IL21_TREATED_TCELL_DN	Sig289	ASB13	ZC3H12A	STK39	TIMM8A	EMB	PAX4	MRPS22	UBE2F	JUNB	GARS	HEATR1	ANKRD57	SH3BP2	SERPINB9	TLR7	PMEPA1	HMGN3	DDIT3	LGALS3BP	ENC1	CCL7	HCAR2	UBE2L3	IL15RA	RNF114	BBX	DDX60	SOCS3	NAA20	LIPG	LUC7L	BST1	HDC	PKIB	TXN	FNBP4	SRM	CLEC4D	TOMM70A	PTGES	MOV10	DNAJC11	PROCR	C11orf24	HIF1A	FPR1	CCL4
GSE19198_CTRL_VS_IL21_TREATED_TCELL_24H_UP	http://www.broadinstitute.org/gsea/msigdb/cards/GSE19198_CTRL_VS_IL21_TREATED_TCELL_24H_UP	Sig290	EIF2B5	LYVE1	CD40	ZC3H12A	SEMA3A	XDH	SCHIP1	AKAP12	CCDC86	DDIT3	SCT	KARS	PSMA2	ANXA7	GRAMD4	ZNRF1	UBC	CXCL11	TNFAIP2	NR1I2	CXCL2	EMP1	TMEM2	JDP2	SLC39A14	ICAM1	MAP3K6	PDE4B	SPSB1	LARS	IFITM3	PRPF31	UBE2G1	SESN1	IL15RA	TIMP1	PTPN22	GBP2	ARIH2	IL1RN	EBNA1BP2	RHOJ	FKBP5	PLA1A	OAF	WIPI2	DDX49
GSE19198_1H_VS_24H_IL21_TREATED_TCELL_UP	http://www.broadinstitute.org/gsea/msigdb/cards/GSE19198_1H_VS_24H_IL21_TREATED_TCELL_UP	Sig291	HGSNAT	VANGL1	ANGPTL2	ALDH3B1	ITGAX	TSC22D1	ADRB1	ANTXR1	MAPK3	ITGAL	SMPDL3A	CYB5R1	TEK	EVI2A	C6orf57	FAM198B	MAN2B1	PRRX2	HFE	CAV1	DHRS1	CD3G	MXRA8	LRRN1	SRPK3	ID4	ADAMTS10	RFNG	ENO3	ARHGAP18	ARHGAP9	CSF1R	RASD2	ABCD1	HADH	TMEM71	SREBF2	KCNJ10	SCP2	PLOD2	RNF38	SH2D3C	ITGB7	CEACAM21	EBPL	SH3KBP1	GDPD2
GSE19888_ADENOSINE_A3R_INH_PRETREAT_AND_ACT_BY_A3R_VS_A3R_INH_AND_TCELL_MEMBRANES_ACT_MAST_CELL_UP	http://www.broadinstitute.org/gsea/msigdb/cards/GSE19888_ADENOSINE_A3R_INH_PRETREAT_AND_ACT_BY_A3R_VS_A3R_INH_AND_TCELL_MEMBRANES_ACT_MAST_CELL_UP	Sig292	SRGN	SUV420H1	CTDSP2	TECPR2	AKT3	RALA	AMN1	ZMYM2	DDX5	FLJ39653	WASL	APC	HBP1	HEXIM1	FHL3	LOC100129550	NBR1	CAMK1D	ZNF217	DUSP2	MED13L	TGIF1	PLXND1	ARAP1	LOC338758	NLRP3	JHDM1D	ATP2B1	FTH1	RABGAP1	SAT1	UBL3	ZEB2	LYZ	BTG1	CFLAR	PNRC1	SH3KBP1	HSPBAP1	DUSP1	ZFYVE1	CXCR4	BCL6	ZNF354A	TCP11L2	LOC375190	FLJ31306
GSE19888_ADENOSINE_A3R_ACT_VS_TCELL_MEMBRANES_ACT_IN_MAST_CELL_DN	http://www.broadinstitute.org/gsea/msigdb/cards/GSE19888_ADENOSINE_A3R_ACT_VS_TCELL_MEMBRANES_ACT_IN_MAST_CELL_DN	Sig293	CBLB	RCE1	GATAD2B	API5	MLL2	CCDC109B	APH1A	SLC22A4	SNTB1	TMEM185B	CCL4	OR7E19P	ANP32A	NPEPPS	LINC00472	HIST1H3F	IPO4	PLAT	ULK1	AP2A1	TMEM128	CPB2	ZNF12	TEX9	MID1IP1	OSBPL8	NKTR	C10orf2	FOS	LOC441245	FEM1B	SRGAP2	MRPS30	ITGB1BP3	DNMT3A	SLC46A1	IER2	APPBP2	ERVMER61-1	FYN	TMUB1	LOC285812	PCIF1	ZNF395	POU3F3	WDR49	GHRLOS2
GSE19888_ADENOSINE_A3R_ACT_VS_TCELL_MEMBRANES_ACT_AND_A3R_INH_PRETREAT_IN_MAST_CELL_UP	http://www.broadinstitute.org/gsea/msigdb/cards/GSE19888_ADENOSINE_A3R_ACT_VS_TCELL_MEMBRANES_ACT_AND_A3R_INH_PRETREAT_IN_MAST_CELL_UP	Sig294	PRPF38A	AIM2	CCND1	SERP1	RXFP3	MAGEA11	SLFN13	TRMT12	KRT18	CLIC3	EXOC1	REEP4	ILF2	TMPRSS4	ZBTB11	PRDM16	PURA	DYRK3	TMEM158	GPR155	SLC30A2	SEMA5A	HIST1H2BL	SWT1	MANF	LOC613266	UNKL	LOC283070	MALT1	CCDC153	KRT31	GOLGA5	C1orf123	PAH	ATP6V0B	LINC00293	ABHD3	STRA13	C12orf48	HLA-DRA	TLX1	PSPH	PLOD1	POP5	C18orf15	PSMD2	ASNSD1
GSE19888_ADENOSINE_A3R_ACT_VS_TCELL_MEMBRANES_ACT_AND_A3R_INH_PRETREAT_IN_MAST_CELL_DN	http://www.broadinstitute.org/gsea/msigdb/cards/GSE19888_ADENOSINE_A3R_ACT_VS_TCELL_MEMBRANES_ACT_AND_A3R_INH_PRETREAT_IN_MAST_CELL_DN	Sig295	NXN	PLXNA3	COL7A1	PTPN14	RALBP1	ZNF692	CHD8	C9orf3	PLCH2	HMG20A	MICALL1	SUN2	JUB	GPR19	FAM168B	PRRC2B	SNAPC4	PTPRF	GRB7	WNT4	TNK1	DFFA	FAT1	ARGLU1	FGFR2	ETS2	EFNA1	CDC42BPG	ANXA8	NFAT5	MYO1E	SRRT	CBX7	TAZ	C5orf34	TNK2	TIAM1	ANAPC5	ERBB3	NEAT1	PRLR	HMGXB3	RANBP10	ARRDC2	SPPL3	SLC25A27	CAPNS2
GSE19888_ADENOSINE_A3R_INH_PRETREAT_AND_ACT_BY_A3R_VS_TCELL_MEMBRANES_ACT_MAST_CELL_UP	http://www.broadinstitute.org/gsea/msigdb/cards/GSE19888_ADENOSINE_A3R_INH_PRETREAT_AND_ACT_BY_A3R_VS_TCELL_MEMBRANES_ACT_MAST_CELL_UP	Sig296	WARS	BATF2	RNF213	STAT2	DAXX	IL18BP	DTX3L	HCK	CD200R1L	USP18	HERC6	CD40	IRF1	FCGR3A	IRF9	FANCA	ISG15	TAP1	PML	ISG20	ETNK1	SAMD9L	OAS3	XAF1	ZBP1	PSME1	SLFN13	IRGM	IFIH1	CMPK2	IL10	STX7	PSMB9	OAS1	CD274	PSMB8	CD72	PARP9	STAT1	43529	APOBEC3B	GCH1	PSMB10	GBP6	GBP7	OASL	PARP11
GSE19888_ADENOSINE_A3R_INH_PRETREAT_AND_ACT_BY_A3R_VS_TCELL_MEMBRANES_ACT_MAST_CELL_DN	http://www.broadinstitute.org/gsea/msigdb/cards/GSE19888_ADENOSINE_A3R_INH_PRETREAT_AND_ACT_BY_A3R_VS_TCELL_MEMBRANES_ACT_MAST_CELL_DN	Sig297	MMP9	ZNF513	HMG20A	DOLK	ANKRD16	FZD2	STX5	MEF2D	GPD1L	KCTD2	KRTCAP2	ABR	TFIP11	ATRNL1	TRIM68	MCART1	IGF1	UBE2J1	ARRDC2	GADL1	TRIP6	SSH1	SUPT5H	RCAN3	REEP5	KAZALD1	C4orf52	PARP16	ANP32B	ALDH18A1	CARM1	ANKMY2	SFT2D3	POFUT2	LENG9	MOCS3	ALG10	REEP6	HELZ	PITHD1	TBC1D10B	FAM105B	DEDD2	SLC16A7	LRP6	XPC	C12orf43
GSE19888_ADENOSINE_A3R_INH_VS_TCELL_MEMBRANES_ACT_MAST_CELL_UP	http://www.broadinstitute.org/gsea/msigdb/cards/GSE19888_ADENOSINE_A3R_INH_VS_TCELL_MEMBRANES_ACT_MAST_CELL_UP	Sig298	GBP6	IRGM	PSMB8	GBP7	CD274	USP18	IFIT1B	TAP1	DTX3L	ADAR	RSAD2	STAT1	TRIM21	CXCL9	IRF1	GBP4	IRF9	CMPK2	RNF213	PARP14	GBP2	MX2	PRIC285	XAF1	PARP12	RTP4	PARP11	IFIT3	IFIH1	TNFAIP2	KLRD1	ISG15	STAT2	OAS2	PSME1	NMI	CXCL10	TLR3	TRIM5	HLA-E	CXCL11	HERC6	PSMB9	RBM43	SLFN13	PARP9	TNFSF10
GSE19888_ADENOSINE_A3R_ACT_VS_TCELL_MEMBRANES_ACT_IN_MAST_CELL_UP	http://www.broadinstitute.org/gsea/msigdb/cards/GSE19888_ADENOSINE_A3R_ACT_VS_TCELL_MEMBRANES_ACT_IN_MAST_CELL_UP	Sig299	PRTG	HCST	TNFRSF13B	FERMT3	TYROBP	RCN3	B2M	OAF	MYO7A	CRIP1	CTSS	DRAM1	NCKAP1L	SDHAF2	CAPNS1	CTSZ	FAM19A2	GNAI2	FXN	HPSE	PAPD4	IRF1	FANCA	PPIC	LCK	PLCB1	FEZ2	MRPL23	RNF144A	TRPV2	NCF4	FAM26F	F2RL3	GGA2	PTPN18	GNAS	GMPPA	AP2A2	CLTA	ARHGAP30	TIFA	MYO1G	LAIR1	APOL6	HK3	LAMA4	SSC5D
GSE19888_CTRL_VS_TCELL_MEMBRANES_ACT_MAST_CELL_PRETREAT_A3R_INH_UP	http://www.broadinstitute.org/gsea/msigdb/cards/GSE19888_CTRL_VS_TCELL_MEMBRANES_ACT_MAST_CELL_PRETREAT_A3R_INH_UP	Sig300	CMBL	EDNRB	TXNDC16	TMEM56	HEATR7B1	HERPUD1	ATRN	ENTPD5	TSLP	BPGM	BNIP3L	CYTL1	EMID2	AGL	SEPP1	PKIA	NDUFB5	ABCC9	IPO7	TNFRSF17	SERINC5	ATP5L	FERMT2	RCAN2	C12orf73	HBS1L	SLC30A9	GP1BB	AQP4	ARHGEF6	KLHL9	ATRNL1	SAR1B	PHYHD1	FN3K	STAB1	FBLN5	CACNA2D1	HABP2	ACOT2	WARS2	GDF10	SLC39A10	SELENBP1	SLCO2B1	PARP1	ZFAND6
GSE19888_CTRL_VS_TCELL_MEMBRANES_ACT_MAST_CELL_PRETREAT_A3R_INH_DN	http://www.broadinstitute.org/gsea/msigdb/cards/GSE19888_CTRL_VS_TCELL_MEMBRANES_ACT_MAST_CELL_PRETREAT_A3R_INH_DN	Sig301	LRFN2	PIK3R5	GNB4	VCAM1	SLFN13	SCLY	SH2D1A	TRIM5	C8orf33	RGS1	TMEM39B	EIF2AK2	UACA	KIAA0317	PTX3	ARHGAP8	IFI27L2	NPC2	FAM26F	C2	STXBP1	SNX10	AXIN2	IDO1	KLRK1	STAT5B	RAPGEFL1	RFX1	SF3A2	PTPRO	TNNI3	IFNB1	CARM1	43529	INPP1	IL12RB1	HK1	APOD	EVI2B	SLAMF9	IFITM3	BCL3	SLAMF8	RBM43	BTG2	CNGB3	LARP1
GSE19888_ADENOSINE_A3R_INH_VS_INH_PRETREAT_AND_ACT_WITH_TCELL_MEMBRANES_MAST_CELL_UP	http://www.broadinstitute.org/gsea/msigdb/cards/GSE19888_ADENOSINE_A3R_INH_VS_INH_PRETREAT_AND_ACT_WITH_TCELL_MEMBRANES_MAST_CELL_UP	Sig302	APLNR	RNF213	MTHFR	C5orf34	CAMK2N1	USP36	GBP6	PSMG4	DTX3L	MYH10	BAIAP2L1	TRIM26	C11orf83	LMOD3	USP18	MCCC1	PDXDC1	PGCP	C17orf101	HLA-DRA	GPD1L	PDPN	TBC1D4	BCO2	IFI27L2	RTP4	RNASE6	CD209	LOC344595	HELZ	OAS2	EFR3A	IL15	AGMO	MAPRE1	LARS2	CA5B	DHRS7	PRELID2	COCH	SERINC3	RSAD2	ATP8A1	ELK3	KAZALD1	PPPDE1	TNMD
GSE19888_ADENOSINE_A3R_INH_VS_INH_PRETREAT_AND_ACT_WITH_TCELL_MEMBRANES_MAST_CELL_DN	http://www.broadinstitute.org/gsea/msigdb/cards/GSE19888_ADENOSINE_A3R_INH_VS_INH_PRETREAT_AND_ACT_WITH_TCELL_MEMBRANES_MAST_CELL_DN	Sig303	PHKG1	SLC5A11	C6orf145	ARGLU1	CHCHD4	EPHB1	H2AFB2	KLK7	GDPD3	FN3KRP	PAN3	IQGAP1	DSC2	IGKC	OLFM4	COL4A6	PPP1R36	ZFP14	ELOVL5	TMEM163	MICALL1	PLXNA3	LRRC3B	GABRA1	ARRDC2	ATP1B3	TINAG	F7	TYR	RPS3A	SERPINB11	PTPRN2	ZP2	LOC390760	SGIP1	C1orf173	TMEM217	IVNS1ABP	ATP1B1	CST8	ANKRD56	CSTF1	CRCT1	PKHD1L1	ZFP92	VN1R5	ARHGAP39
GSE19888_NO_PRETREAT_VS_ADENOSINE_A3R_INHIBITOR_PRETREATED_MAST_CELL_TCELL_MEMBRANES_ACT_DN	http://www.broadinstitute.org/gsea/msigdb/cards/GSE19888_NO_PRETREAT_VS_ADENOSINE_A3R_INHIBITOR_PRETREATED_MAST_CELL_TCELL_MEMBRANES_ACT_DN	Sig304	PMP22	ARHGAP1	C10orf32	DHFR	ARHGAP30	GPX3	IL10RB	LARS2	NUDC	BAHD1	CTBS	MRPS10	C8orf59	RWDD1	FAM118B	HHEX	USP38	CDK5RAP1	ITGAM	MEX3D	PPIC	ACO2	SMO	ARHGEF10	FAM65A	CYB561D2	MRPL30	GRN	RALA	HLA-G	CHCHD7	MPP1	GYPC	FKBP1B	LUM	MCEE	NCCRP1	C1orf122	IL15	B4GALT5	ISG15	C1orf93	SLC45A4	ZHX1	NDUFA2	MOCS2	PFN2
GSE19888_ADENOSINE_A3R_INH_VS_TCELL_MEMBRANES_ACT_MAST_CELL_DN	http://www.broadinstitute.org/gsea/msigdb/cards/GSE19888_ADENOSINE_A3R_INH_VS_TCELL_MEMBRANES_ACT_MAST_CELL_DN	Sig305	OCA2	CYP2C19	SLC17A3	GABRG3	ARHGEF9	XPO7	VASP	DBH	WEE2	MMP9	POU2F1	PAM	NETO1	ST6GAL2	ZNF398	NUDCD3	ABCB8	NFE2L1	JUB	CYB5R2	PNPLA3	ANKZF1	HS3ST2	CYP4A22	ELAVL4	SLC44A2	CCDC157	ZC3H11A	FGFR3	CBLC	MED18	PKP1	DPPA2	P2RX2	ADAT2	PNMT	PLS3	CIT	S100A14	GHR	C1QL3	DFNB31	PAX1	CDCP1	HMGCS1	RPS14	CHADL
GSE19888_ADENOSINE_A3R_INH_PRETREAT_AND_ACT_BY_A3R_VS_A3R_INH_AND_TCELL_MEMBRANES_ACT_MAST_CELL_DN	http://www.broadinstitute.org/gsea/msigdb/cards/GSE19888_ADENOSINE_A3R_INH_PRETREAT_AND_ACT_BY_A3R_VS_A3R_INH_AND_TCELL_MEMBRANES_ACT_MAST_CELL_DN	Sig306	C11orf1	FOXD2	PAQR8	FICD	NUP214	LGALS1	PRKCH	RPS6KA3	C1orf52	MYO9B	PTPRCAP	ARID4A	RBM18	CCNE2	IDH2	STIM2	ATG16L2	SLC5A2	PRKAB1	NCEH1	TMEM86B	RELN	NRF1	CASP6	ANKH	ARNTL	LIMS3L	DHX15	GPATCH1	C6orf26	EIF2C2	FEZ2	C9orf142	FLNB	RSRC1	ZNF652	HAUS3	POLD1	CNOT2	NFKBIZ	RBMS1	DDX3X	LSM14B	ACPP	CHMP5	FAAH	C5orf34
GSE19888_NO_PRETREAT_VS_ADENOSINE_A3R_INHIBITOR_PRETREATED_MAST_CELL_TCELL_MEMBRANES_ACT_UP	http://www.broadinstitute.org/gsea/msigdb/cards/GSE19888_NO_PRETREAT_VS_ADENOSINE_A3R_INHIBITOR_PRETREATED_MAST_CELL_TCELL_MEMBRANES_ACT_UP	Sig307	BMPR2	PITHD1	WBSCR27	LMLN	TRIM27	DCBLD2	ZBTB3	UNC13B	ACACA	HNRNPC	RHBDD3	IL17RC	TMEM120A	CD99	ACOX3	CTBS	CYFIP1	FEN1	SCFD1	SGCE	LBX1	CEP76	ZNF606	PAK4	ANKRD55	C6orf62	ATP8B2	CNDP2	RFC5	KCTD11	SULT1A1	MARVELD2	TTC9B	PIGX	VMA21	C13orf33	METTL21D	RRS1	LAG3	BCKDK	C16orf78	USP21	BMP5	KIF1C	ADORA2A	FBLIM1	RPUSD3
GSE21360_PRIMARY_VS_QUATERNARY_MEMORY_CD8_TCELL_DN	http://www.broadinstitute.org/gsea/msigdb/cards/GSE21360_PRIMARY_VS_QUATERNARY_MEMORY_CD8_TCELL_DN	Sig308	SMURF2	MCM3AP	LETMD1	SIRT3	CEP350	SPG11	PPP2R5A	SNRK	CREB1	DET1	BACH1	ZBED5	PPP1R12A	PLEKHO1	SNX6	BRD1	BBX	ARL2BP	CSRNP2	ZNF814	TGOLN2	WDR44	FRAT1	ZBTB22	HIPK1	SON	LEMD3	CCS	CD247	PRKCZ	BNIP3L	FAM117A	LPIN1	KLHDC10	CD96	KIAA0494	SHC1	TMED10	MACF1	SSH3	OSBPL2	RPL37	MON2	IRF7	RXRB	SYNJ2BP	C2orf68
GSE21360_SECONDARY_VS_TERTIARY_MEMORY_CD8_TCELL_UP	http://www.broadinstitute.org/gsea/msigdb/cards/GSE21360_SECONDARY_VS_TERTIARY_MEMORY_CD8_TCELL_UP	Sig309	MMACHC	TRIB3	HSPB11	ACTB	CD3EAP	SCD	PLAGL2	ASNS	MNAT1	NFYC	MRPL48	TPRKB	ACTR3	AGPS	RAD50	VBP1	PKMYT1	PAM16	CDC23	POP4	ATF6	PRPF19	INTS12	BNIP1	CYP1B1	DNPEP	RANGRF	NOP14	HAT1	MRPL11	UTP6	SEC23B	PWP1	B3GNT2	HDGF	GGH	TRIM24	MRPL16	SDHB	LSM4	SENP3	NIT2	PSME2	TK1	TAF1A	NOL7	CALM3
GSE21360_NAIVE_VS_TERTIARY_MEMORY_CD8_TCELL_DN	http://www.broadinstitute.org/gsea/msigdb/cards/GSE21360_NAIVE_VS_TERTIARY_MEMORY_CD8_TCELL_DN	Sig310	RGS4	CYP2B6	SPSB3	GLYR1	PLCG1	LAGE3	NCK2	TOM1	CCNI	RNPEP	NPRL2	HIST1H4J	PRDX2	REG3A	C21orf33	PTTG1	RPL13	RAB33A	RHOF	CPVL	NCR3	PACS2	ACTA2	GIPC1	TES	VPS52	RPL27	PHF1	PPP2R5D	C11orf49	ESYT1	CDKN3	RNF44	FGR	KCNJ9	FKBP2	LUC7L	CHKB	CYTH4	NDRG3	COTL1	CEACAM8	CBX7	KLHDC2	GLRX5	APBB3	FHL1
GSE21360_NAIVE_VS_QUATERNARY_MEMORY_CD8_TCELL_UP	http://www.broadinstitute.org/gsea/msigdb/cards/GSE21360_NAIVE_VS_QUATERNARY_MEMORY_CD8_TCELL_UP	Sig311	STAT2	ISG15	USP18	NADK	OASL	SP110	IFIT1	SLC39A14	SAMD9	MED6	KRTAP1-1	OAS1	N4BP1	TRIM21	TTC35	HERC5	LAMP3	ARMC8	SLC24A1	IFI27	EIF5	PRRC1	C12orf4	ENPP2	C10orf2	MX2	HERC6	FAM46A	PCID2	B3GNT2	CD69	ISG20	DROSHA	POLR3G	OAS2	PLSCR1	IFI35	MAK16	EHD4	HOMER1	NCOA3	LRIF1	ARHGAP5	SETD4	PPP2R2A	DDX58	LAP3
GSE21360_NAIVE_VS_TERTIARY_MEMORY_CD8_TCELL_UP	http://www.broadinstitute.org/gsea/msigdb/cards/GSE21360_NAIVE_VS_TERTIARY_MEMORY_CD8_TCELL_UP	Sig312	HCG26	PTTG1	SLC23A2	CERK	NCR3	MAGEB3	TPT1	VAT1	MTCP1NB	LTB	CBX7	KLHDC2	C21orf33	CD68	ESYT1	CYP4F2	RCN2	ZNF318	RPL13	RASL11B	FHL1	HIST1H4J	MYH10	TPST1	NF2	COTL1	SEC14L1	DCHS1	LSM12	VAMP1	AKAP8	RPA3	LASP1	ZBTB7A	UBE2C	SF3A3	OCEL1	REG3A	SUOX	SERF2	CCNB2	RAB33A	ATXN2L	RGS10	PPP6C	ACO1	SPCS3
GSE21360_NAIVE_VS_QUATERNARY_MEMORY_CD8_TCELL_DN	http://www.broadinstitute.org/gsea/msigdb/cards/GSE21360_NAIVE_VS_QUATERNARY_MEMORY_CD8_TCELL_DN	Sig313	OASL	USP18	ISG15	BCAP29	SLC39A14	SP110	IFIT1	TRIM21	UBC	LAMP3	PRRC1	HERC5	GTF2B	OAS1	SLC24A1	N4BP1	KLHL20	RNF8	BST2	CD69	C10orf2	SAMD9	NIPBL	CD38	IFITM2	HERC6	EHD4	IFI27	CRK	IRF9	NGLY1	DDX58	ZNF148	MX2	ZCCHC2	IFITM1	BZW2	TDRD7	IFI44	SP140	CSNK1G1	RTP4	DDX60	FAM46A	TNPO2	MYF6	LARP1
GSE21360_PRIMARY_VS_SECONDARY_MEMORY_CD8_TCELL_UP	http://www.broadinstitute.org/gsea/msigdb/cards/GSE21360_PRIMARY_VS_SECONDARY_MEMORY_CD8_TCELL_UP	Sig314	ATP2B2	CTRC	NUBPL	OLFML1	SPINK1	SMTN	CRCP	CRYAB	BMP8B	CCDC82	RPS3A	PTGS2	RXRG	GLS	KRTAP1-1	FOXN1	ALDH7A1	KCNIP2	GHSR	VPS33A	CACNA1H	LYPLA1	TRIM45	CCPG1	RAB33B	DHX29	ANP32E	LOC399904	OR2F1	C10orf10	DNAJC10	SERBP1	C10orf88	MYBPC3	UPB1	OPLAH	XPOT	APCS	ADSS	ZNF16	AGA	GLRX3	GRIN2D	TPST1	KIAA1324	GPR21	GNG4
GSE21360_PRIMARY_VS_SECONDARY_MEMORY_CD8_TCELL_DN	http://www.broadinstitute.org/gsea/msigdb/cards/GSE21360_PRIMARY_VS_SECONDARY_MEMORY_CD8_TCELL_DN	Sig315	TMEM127	SNTA1	ABCA1	ASB8	C7orf43	OR1F1	SAP30L	SCAMP2	ITGB8	SGSH	KLHL20	ULK1	AGT	C19orf22	C22orf43	SETDB1	A4GNT	RDH16	IGFBP4	ZNF324	GTF3C2	BRD9	FHOD3	LUC7L	SLC15A3	C19orf66	WNT10B	FUT2	TM6SF2	NFE2L2	PSG2	PABPN1	GABRP	NOP2	PTPRH	MNS1	ELAVL2	BSN	TGFBI	DOCK5	HTR1E	RNF4	PHKA2	FASTK	AMELY	TIMM44	C17orf39
GSE21360_SECONDARY_VS_TERTIARY_MEMORY_CD8_TCELL_DN	http://www.broadinstitute.org/gsea/msigdb/cards/GSE21360_SECONDARY_VS_TERTIARY_MEMORY_CD8_TCELL_DN	Sig316	ABHD15	NFATC2	CMTM3	CX3CR1	FGD2	PFKM	TMEM86A	CNR2	LMO2	SLC25A26	TK1	WDR6	MCM5	TUBB4B	EVC2	DAGLB	JMJD5	TCF19	RPS6KA1	BUB1B	RGS2	LBH	SYT13	STEAP3	BUB3	CSE1L	HAAO	CUTA	MEF2C	CYP27A1	MCM3	MEIS1	ABCA9	LAIR1	MAN1C1	SLC9A9	GPR65	CDC6	SLC29A3	HPS3	CCNJL	FASN	MXD4	LYSMD4	LIG1	KLC4	MARVELD1
GSE21360_SECONDARY_VS_QUATERNARY_MEMORY_CD8_TCELL_UP	http://www.broadinstitute.org/gsea/msigdb/cards/GSE21360_SECONDARY_VS_QUATERNARY_MEMORY_CD8_TCELL_UP	Sig317	NFKBIZ	IL1RN	PFKFB3	NUPR1	MAP3K8	SOCS3	DUSP1	ZFP36	SOD2	DUSP2	FPR1	EML2	SBNO2	RNF149	IL1B	ANXA8	PTGS2	NFKBIA	NOS2	CLIC4	UHRF1BP1L	SLC39A14	PROCR	CLEC4E	SLAMF7	TNIP1	TET2	CD40	FAS	GADD45B	TTC39C	TNFRSF1B	NFKB1	DUSP16	DSP	RIN2	CCL3	ARID5A	ELL2	GYS1	TNFAIP3	MMP13	DSG3	TREM1	CASP4	GAB1	TNIP3
GSE21360_PRIMARY_VS_QUATERNARY_MEMORY_CD8_TCELL_UP	http://www.broadinstitute.org/gsea/msigdb/cards/GSE21360_PRIMARY_VS_QUATERNARY_MEMORY_CD8_TCELL_UP	Sig318	CYBB	FLNA	CLEC4E	WDR91	RSAD2	AMDHD2	FOS	ZFAND2A	PDE7B	AHNAK	PLK2	EMR4P	RNY3	STAT1	EGR2	CD74	LGALS3BP	PTPRJ	ATP6V0D2	XRCC1	DUSP9	USP18	LRP12	RNF213	CLEC4D	TRIM25	ENGASE	PLXNC1	NQO1	PLD3	GLTP	GPR137B	IFIT3	MYOF	GPNMB	PTGR1	PML	CYB5A	GABARAPL1	SAMD9L	IL2RG	HPGD	HERC5	VWF	IFIT2	MLKL	SRXN1
GSE21360_NAIVE_VS_PRIMARY_MEMORY_CD8_TCELL_UP	http://www.broadinstitute.org/gsea/msigdb/cards/GSE21360_NAIVE_VS_PRIMARY_MEMORY_CD8_TCELL_UP	Sig319	SPINK2	NAAA	SLC12A7	TMEM9	PRUNE2	CD101	ECM1	DHCR24	CH25H	EDNRA	LBP	PGAM1	PGM2	TCN2	LFNG	SPSB1	DSC1	GPR84	SEMA4C	PTGFRN	SNX1	SLC16A3	CCR1	HTR2B	CDCA4	ADAMTSL4	STEAP4	HK2	C1QB	HOXA2	SMAGP	SOX4	STAT3	CRYL1	SEMA6B	PIK3R2	ULK2	PTPN7	TMEM173	QSOX1	SLC2A1	TBC1D14	RUNX3	SLC39A14	EPS8	PVRL2	RHOH
GSE21360_NAIVE_VS_PRIMARY_MEMORY_CD8_TCELL_DN	http://www.broadinstitute.org/gsea/msigdb/cards/GSE21360_NAIVE_VS_PRIMARY_MEMORY_CD8_TCELL_DN	Sig320	HAVCR2	SLC46A3	HPGDS	RSAD2	STAB2	FMN1	CUTA	IRF8	OLFML3	FAM20C	SAT1	PQLC2	GNA12	TRIM25	GCNT1	SLC6A8	COTL1	ITGAV	IL6ST	LDHB	LGALS3BP	SLC29A3	CD109	PKIB	HEXB	CDO1	RGS1	VWA5A	RCBTB2	CX3CR1	AHNAK	RNF150	DHRS3	PLEKHM1	NRP1	SAMD9L	RGL2	MAN2B1	PAOX	RAP2A	CERK	GUSB	TBC1D16	ATP6V0D2	RNF144B	MMD	PLD4
GSE21360_NAIVE_VS_SECONDARY_MEMORY_CD8_TCELL_UP	http://www.broadinstitute.org/gsea/msigdb/cards/GSE21360_NAIVE_VS_SECONDARY_MEMORY_CD8_TCELL_UP	Sig321	VCL	SEMA4A	PIK3CG	ADAMDEC1	RAB11FIP1	PTPN1	PGM2	FHL3	TRAF3IP2	DENR	GALNT2	NFKBIE	PRKAR2B	PGAM1	HERPUD1	BLK	SPN	ME1	RELT	FAM55C	POU2AF1	VASP	DST	CMAHP	LPCAT2	HK2	AHR	DGKH	RTN2	FCGR2B	SLC1A2	PION	CH25H	HCLS1	MYD88	RAPGEF2	MALT1	IL12B	CSF3	SLC11A2	MIF	MEFV	TRAF1	MARCKSL1	SH2B2	SLC13A3	LRRC8C
GSE21360_NAIVE_VS_SECONDARY_MEMORY_CD8_TCELL_DN	http://www.broadinstitute.org/gsea/msigdb/cards/GSE21360_NAIVE_VS_SECONDARY_MEMORY_CD8_TCELL_DN	Sig322	PTCHD1	PTMS	ATP6V0D2	IFIT2	DNMT3A	FABP4	PLXNC1	KEAP1	RGS1	PLD3	CACNA1A	AHNAK	OGT	WDR91	BRI3	VWF	RRAGC	CD9	GPR137B	PDLIM4	IRF7	LPL	ZFAND2A	PARP12	COX4I1	PDP1	MBNL2	IFI44	MX1	DDX60	ANXA4	NFASC	TRIB3	MYOF	SAMD8	XAF1	OSBPL8	KCNJ10	TFRC	ACSS2	MICAL1	CD97	OAS3	RNU2-1	SYNE1	ZNFX1	LGALS3BP
GSE21360_SECONDARY_VS_QUATERNARY_MEMORY_CD8_TCELL_DN	http://www.broadinstitute.org/gsea/msigdb/cards/GSE21360_SECONDARY_VS_QUATERNARY_MEMORY_CD8_TCELL_DN	Sig323	PDK1	SLC39A14	EGLN1	SLC39A1	TCF3	PFKL	EDNRB	ARG1	CTSC	BNIP3	TREM1	CAMKK1	NFIL3	SRGN	CCND2	RELT	LDHA	NDUFV3	C1RL	EGLN3	IFITM1	CHSY1	PGM2	TPI1	TMEM2	MAP4K4	HOXA2	SOCS3	THBS1	HK2	SEMA4C	PDPN	EMILIN2	DSC1	PTPN7	PKM2	ARHGAP4	PTPN1	LAMC1	TNFAIP8	43525	MAGED1	PRELID1	TUBA1A	ATRNL1	ABCA1	FBXL5
GSE21360_TERTIARY_VS_QUATERNARY_MEMORY_CD8_TCELL_UP	http://www.broadinstitute.org/gsea/msigdb/cards/GSE21360_TERTIARY_VS_QUATERNARY_MEMORY_CD8_TCELL_UP	Sig324	CEBPA	FUNDC1	LMO2	CD109	TCN2	SNX1	GDE1	PRUNE2	PPT1	CCR1	LBP	RNF150	ZDHHC14	HPGDS	PYCARD	GNA12	SORT1	SEMA6B	CABLES1	DMPK	RASA3	ITGAD	SPON1	TMEM173	EPS8	P2RY13	PTGFRN	MAN2B1	CYB5R1	SPINK2	JMJD1C	KHK	DHRS3	CDCA5	SMAGP	GALNS	TBXAS1	PLXDC1	CNR2	SSH2	SPRY2	LFNG	ARL11	PAOX	ICA1	HEXB	TSPAN9
GSE21360_TERTIARY_VS_QUATERNARY_MEMORY_CD8_TCELL_DN	http://www.broadinstitute.org/gsea/msigdb/cards/GSE21360_TERTIARY_VS_QUATERNARY_MEMORY_CD8_TCELL_DN	Sig325	CMPK2	PRKCD	PION	KRTCAP2	MORF4L2	CBLN1	ETS1	RAB10	TXNRD1	LIMS1	HSPD1	FAM55C	SERP1	ME1	FCRL5	CMTM3	ZADH2	LY6D	VCL	DGAT2	TES	PFKFB3	RILPL2	RAP1GAP2	STK40	PLEKHA1	NOP58	RAPGEF5	IFITM2	LCP2	USP18	MS4A1	PDE4B	TMEM2	ARHGAP31	MRAS	ATF4	FAM176B	CFLAR	STAT1	SRC	MAPKAPK2	NQO1	EAF1	TLR1	PTPRJ	PTTG1IP
GSE21360_PRIMARY_VS_TERTIARY_MEMORY_CD8_TCELL_UP	http://www.broadinstitute.org/gsea/msigdb/cards/GSE21360_PRIMARY_VS_TERTIARY_MEMORY_CD8_TCELL_UP	Sig326	CTPS	CLPTM1	CHST15	UBAC1	TNFSF14	RXRA	LAIR1	ARF1	FOXO3	SNW1	TLR5	SLC16A3	SQSTM1	NQO1	DNASE1L1	SLC36A1	MAPK14	DDIT4	TESK1	LYL1	HS3ST1	TATDN2	ARAP1	AFG3L2	MAPK13	CLIP2	DOK1	IFIT1	ACTR1B	MAP2K1	ODC1	SERPINE1	PLEKHO2	CXCR4	FOXO1	MITF	CIAO1	LETMD1	FARSA	KIF13B	CSK	TWF2	POP1	RHOG	MGLL	DNMBP	CLPX
GSE21360_PRIMARY_VS_TERTIARY_MEMORY_CD8_TCELL_DN	http://www.broadinstitute.org/gsea/msigdb/cards/GSE21360_PRIMARY_VS_TERTIARY_MEMORY_CD8_TCELL_DN	Sig327	PSMB9	PTPN2	APOL1	IRF8	IRF4	ANKS1A	CDKN1A	ZNF200	CASP4	SASH1	PTGER4	IDO1	RNF19B	TNF	PDGFB	C16orf7	SAMD4A	IRF1	IFI35	CXCL10	GPR107	ICAM1	CD69	WARS	P2RX4	ZFP36	RBCK1	AK4	CDC42EP2	NAPA	SECTM1	CXCL9	SMPD1	CCL7	SERPING1	CXCL11	RBMS1	SBNO2	PLEK	TAP1	GEM	TRAFD1	TNFAIP2	DYNLT1	FZD7	CYP1A1	LCP2
GSE22196_HEALTHY_VS_OBESE_MOUSE_SKIN_GAMMADELTA_TCELL_DN	http://www.broadinstitute.org/gsea/msigdb/cards/GSE22196_HEALTHY_VS_OBESE_MOUSE_SKIN_GAMMADELTA_TCELL_DN	Sig328	IER3	THBS1	CD99	RPL36A	PCBD1	VAPB	CRIP1	PLEC	CCL3	ADA	NQO1	MSC	PLOD3	PPIF	STK38L	ALCAM	HPCAL1	DNAJB5	SRSF2	CAPN2	SERPINB8	GNA15	TNFSF14	ENG	BID	HNRNPL	CD163	MARCKSL1	SERPINB2	MN1	NFKB1	UQCRQ	ANPEP	HMGA1	LGALS1	SH3GL1	IL8	KANK1	ARL4C	HOMER3	SERPINE1	SMURF2	YWHAH	STAB1	ASNA1	NCOR2	PHLDB1
GSE22196_HEALTHY_VS_OBESE_MOUSE_SKIN_GAMMADELTA_TCELL_UP	http://www.broadinstitute.org/gsea/msigdb/cards/GSE22196_HEALTHY_VS_OBESE_MOUSE_SKIN_GAMMADELTA_TCELL_UP	Sig329	SDHB	TFCP2	CXCL9	PIM1	IFI44	PCK2	IL10RA	KDM3B	RERE	STOM	PSMB9	C1S	HMGCL	PPAP2B	XPO6	PTPN2	P2RY14	CD38	RARRES3	NAT6	FAM168A	RBCK1	WDR7	HRSP12	FGL2	DDB2	PEX14	MPO	KIAA0922	NDUFS2	ABHD5	NR1H3	PTK2B	MTHFD1	FIG4	TRIO	SASH3	IVD	CXCL10	IRF1	TNFSF10	LOC729400	COG5	OGT	GBP1	ALAS1	TNFAIP2
GSE20754_WT_VS_TCF1_KO_MEMORY_CD8_TCELL_DN	http://www.broadinstitute.org/gsea/msigdb/cards/GSE20754_WT_VS_TCF1_KO_MEMORY_CD8_TCELL_DN	Sig330	PCNA	ZDHHC15	MXD4	POT1	RFX5	WDR7	ATG3	FIGNL1	MCM5	UBASH3B	MBTPS2	CEP57L1	SEPHS1	PTPN20B	C22orf40	EZH2	FAM120C	RREB1	TRIM14	UNG	HNRNPUL2	EME1	ICT1	RTTN	SFI1	PSMG2	ENPP4	TCF7L2	BRAT1	TMPO	C12orf48	PNPO	PDLIM2	DOCK7	PIAS3	KIAA1967	NCEH1	CLSPN	TOR1A	ELOVL5	DDHD2	PTEN	MRPL51	GALNT4	SNX9	C17orf90	C20orf177
GSE20754_WT_VS_TCF1_KO_MEMORY_CD8_TCELL_UP	http://www.broadinstitute.org/gsea/msigdb/cards/GSE20754_WT_VS_TCF1_KO_MEMORY_CD8_TCELL_UP	Sig331	SWAP70	EPHA2	NFKBIB	HSPA1B	ERCC1	ARID5A	FRS2	RAB1A	ATP6V1C1	MRPL32	CWC25	BCL2L11	SRC	KLHL26	AMHR2	WBP2	PDRG1	ATF5	VAMP2	C2orf47	DUSP1	PPP1R15A	TBC1D12	NR4A1	C3AR1	UBE2B	C16orf5	ABL2	ZEB1	ADNP2	TNIP1	TIMM10	SQSTM1	ATF3	CCDC86	RASSF8	ASB1	HBS1L	RAB20	KCMF1	CCRN4L	BTG3	ZNF830	ZBTB39	CHD2	SERTAD1	PTPN2
GSE17301_ACD3_ACD28_VS_ACD3_ACD28_AND_IFNA5_STIM_CD8_TCELL_DN	http://www.broadinstitute.org/gsea/msigdb/cards/GSE17301_ACD3_ACD28_VS_ACD3_ACD28_AND_IFNA5_STIM_CD8_TCELL_DN	Sig332	P2RY14	QTRTD1	ARHGAP17	MINA	RSU1	ENPP2	TYROBP	CDH1	MS4A4A	BLNK	TCF4	PPP1R15A	KIAA0226	TPM2	RNF130	ADAM9	POLB	IGJ	STX7	TSPAN13	PDIA5	TNFSF13	HERPUD1	SPIB	GZMB	NDST3	NPC2	NLE1	TCL1A	GRN	MAN2B1	CDK6	RPS6KA1	C9orf91	RGS2	UTRN	IQSEC1	CLIC3	CTSB	ST6GALNAC4	LILRB4	FOSB	IGF1R	SERPINF1	LILRA4	TMEM184B	USP18
GSE17301_CTRL_VS_48H_IFNA2_STIM_CD8_TCELL_DN	http://www.broadinstitute.org/gsea/msigdb/cards/GSE17301_CTRL_VS_48H_IFNA2_STIM_CD8_TCELL_DN	Sig333	TRBC1	PLXDC1	GMEB2	CD8A	RHOT2	GPR44	CDC42EP3	SUN2	HOXB2	ARNTL	NDE1	LRRC16A	RORC	DUSP8	CEP164	MAST4	NMU	CTC1	SPSB3	SETD1B	ACSBG1	KLF7	ZNF337	GSS	HDAC7	AKAP3	GTSE1	POGLUT1	SATB1	AGER	CD1C	CD8B	SIT1	UPB1	KIF21B	CEP85	ACTR1B	CAPN10	LRCH4	ARHGEF1	MED25	POLH	TMEM110	C21orf96	BCL6	ZNF562	EPHB6
GSE17301_ACD3_ACD28_VS_ACD3_ACD28_AND_IFNA2_STIM_CD8_TCELL_UP	http://www.broadinstitute.org/gsea/msigdb/cards/GSE17301_ACD3_ACD28_VS_ACD3_ACD28_AND_IFNA2_STIM_CD8_TCELL_UP	Sig334	TXNDC3	SMARCC1	KIAA0664	CLSTN1	RAB4A	LOC646808	ATAD5	CTSG	HINT1	CCNE2	POLR3C	SSBP3	MCM3	SERP1	TERT	GPI	CHST11	RUFY3	BAG2	YWHAE	PRKDC	REPIN1	PSMA6	MRPL3	TREML2	CYC1	U2AF2	POLE	MKRN7P	ARHGAP33	KIAA0922	CHST10	YBX1	GPR25	SEMA3B	AURKA	RFC4	CXCL1	KIF18A	PRSS50	SLC43A3	COLQ	ZNF556	ALG12	FCN3	MGLL	METTL2B
GSE17301_IFNA2_VS_IFNA5_STIM_ACD3_ACD28_ACT_CD8_TCELL_UP	http://www.broadinstitute.org/gsea/msigdb/cards/GSE17301_IFNA2_VS_IFNA5_STIM_ACD3_ACD28_ACT_CD8_TCELL_UP	Sig335	N4BP2L1	P2RY10	TCF25	SOS2	MFSD1	PIM2	SPRY2	ZFYVE16	RAB3GAP1	GVINP1	MTCP1	FBXO21	ETHE1	LRIF1	TRIP11	GPRASP1	HERC1	LPIN2	ARFRP1	SPRY4	CCNT2	PNN	ZNF238	JMJD1C	LOC100129250	WNT10B	CTR9	RAP2C	LRRC16A	CSK	ETNK1	FAM89B	FLJ38109	ACTN1	PLEKHA1	AHCTF1	FBXO34	CNOT8	ATP8A1	DDX60	IFNA6	STAT5B	PIBF1	N6AMT1	KIF3C	CRYL1	C3orf37
GSE17301_IFNA2_VS_IFNA5_STIM_ACD3_ACD28_ACT_CD8_TCELL_DN	http://www.broadinstitute.org/gsea/msigdb/cards/GSE17301_IFNA2_VS_IFNA5_STIM_ACD3_ACD28_ACT_CD8_TCELL_DN	Sig336	RCAN1	GTF2A1	MSRB2	FOLH1	BAG2	BRIP1	HUS1	VAT1	HOXC8	POLD1	SERP1	KIAA0664	TOP2A	SNRNP25	ANP32A	CIT	YWHAQ	GINS4	HLA-DRA	SKP2	RHOBTB3	PSMA6	TFDP2	HMGB3P1	IMPG1	NOL7	MC4R	HSPB8	MLF2	SOD2	MEF2C	SNRPA1	TIGD1L	ARHGAP6	ETV5	TEX13A	MCM3	H1F0	MORF4L2	BEGAIN	PSMD8	LOC388796	IL7	STK32B	DCLRE1B	HCFC1	GLO1
GSE17301_CTRL_VS_48H_IFNA2_STIM_CD8_TCELL_UP	http://www.broadinstitute.org/gsea/msigdb/cards/GSE17301_CTRL_VS_48H_IFNA2_STIM_CD8_TCELL_UP	Sig337	TRIB1	MFSD1	MLYCD	TSPYL1	RAB3GAP1	IMPACT	EXT2	ASAH1	PSMD5	RPS15A	TAX1BP1	FABP7	P2RX5	VPS16	FBXO21	MALT1	DGKZ	PIM2	ASTE1	SIAH1	WAPAL	PRMT2	MCL1	PAPOLA	ZNF238	KDSR	GRAMD3	SEC22A	RBBP5	ESYT1	MBD1	SLC30A1	PJA1	BIRC3	BFAR	B4GALT7	JMJD1C	BNIP3	PRRC2B	KDM6B	UBTF	PIK3CB	CALCOCO1	LINS	PHYH	IL27RA	CDR2
GSE17301_CTRL_VS_48H_ACD3_ACD28_IFNA2_STIM_CD8_TCELL_DN	http://www.broadinstitute.org/gsea/msigdb/cards/GSE17301_CTRL_VS_48H_ACD3_ACD28_IFNA2_STIM_CD8_TCELL_DN	Sig338	RORC	RHOT2	PRRC2A	CEP85	PLS1	CEP164	NARFL	KDM5C	AKAP3	CDC42EP3	MICAL3	ACSBG1	CD1C	GSS	TTLL3	FXYD2	HSPBP1	CD8A	GPR44	DAPK1	E2F3	NEFH	CD1A	CLSPN	LIMK2	HMGN2	HOXA10	43716	ORC6	CD8B	RAG1	POLH	MYBL2	FSTL1	FKBP4	LCT	GTSE1	PTGES2	HMGB2	ORAI2	CDK5RAP2	SLC1A5	ARL4A	SPPL2B	CD72	IQCC	TST
GSE17301_ACD3_ACD28_VS_ACD3_ACD28_AND_IFNA2_STIM_CD8_TCELL_DN	http://www.broadinstitute.org/gsea/msigdb/cards/GSE17301_ACD3_ACD28_VS_ACD3_ACD28_AND_IFNA2_STIM_CD8_TCELL_DN	Sig339	GPRASP1	ACVR1	C21orf91	KIAA0564	OPTN	CTBS	ABCC4	CLN5	BAG3	HMOX2	RSU1	ARID5A	GIMAP4	CFP	FUT8	HTR2B	AVL9	MINA	TTC17	ZNF189	TRAM2	CYTH1	BTN3A3	ZSCAN16	SMAD7	PAPOLG	PER2	COQ10B	RALGAPA1	TMPRSS3	BAG4	SLC7A6	SLC31A1	CPD	IPCEF1	DDX60	TES	SIPA1	ATXN1	ENPP2	TMEM183A	FBXL4	DDX58	LIPT1	DIAPH1	EFNA4	NAA60
GSE17301_ACD3_ACD28_VS_ACD3_ACD28_AND_IFNA5_STIM_CD8_TCELL_UP	http://www.broadinstitute.org/gsea/msigdb/cards/GSE17301_ACD3_ACD28_VS_ACD3_ACD28_AND_IFNA5_STIM_CD8_TCELL_UP	Sig340	HLA-DRB4	PSTPIP2	LIMK2	GSS	CEP85	ACSBG1	CD1C	GTSE1	PPP2R4	RORC	CLSPN	PTGES2	ZW10	CD1E	PRRC2A	QSER1	C9orf38	PPME1	DNTT	MYBL2	INSR	KPTN	CDC42BPB	NEIL1	ORC6	SETBP1	FXYD2	KIFC1	CFL1	DOHH	TYMS	DAPK1	RAB32	SPPL2B	VIPR2	NARFL	OSBPL1A	GPR44	CHML	PCBP3	KIAA1310	ARID3A	CD1B	GUCY1B3	MICAL3	HIST1H2BM	CD4
GSE17301_IFNA2_VS_IFNA2_AND_ACD3_ACD28_STIM_CD8_TCELL_UP	http://www.broadinstitute.org/gsea/msigdb/cards/GSE17301_IFNA2_VS_IFNA2_AND_ACD3_ACD28_STIM_CD8_TCELL_UP	Sig341	ZNF623	SRF	CUL2	HMOX2	DENND4A	COQ10B	SYNJ2BP	SLC7A6	OPTN	ROBO1	PLXDC1	NELL2	SDCCAG3	NAA60	RSU1	TMEM183A	ZNF189	HOXB2	C21orf91	TRAM2	SERPINI1	ABCC4	AVL9	ZFAND3	SPINK2	CCDC25	RAB5B	RALGAPA1	RPS6KA1	KLHL36	CDH1	PDE3B	C9orf91	ATXN1	TAOK3	IFIT1	NT5E	CTBS	TMPRSS3	KIAA0226	TES	UBL3	EDEM2	VAMP5	TXK	CCL5	SLC18A2
GSE17301_IFNA2_VS_IFNA2_AND_ACD3_ACD28_STIM_CD8_TCELL_DN	http://www.broadinstitute.org/gsea/msigdb/cards/GSE17301_IFNA2_VS_IFNA2_AND_ACD3_ACD28_STIM_CD8_TCELL_DN	Sig342	C11orf63	TREM1	CA7	ADCY10	ZNF195	EPHA2	C17orf48	TPD52	EPS8L1	RAB14	SNX1	VCL	USP15	CYB561	PDE8B	GINS2	SEC24D	GCK	GPHN	DNAH6	DPYD	GNA15	MXI1	SOCS2	STK39	NEK3	HPGD	RCBTB2	ITM2A	PTGIR	SOX2	DDR2	SLC31A1	CLCA3P	EID1	TPM2	MLEC	CREG1	YES1	NDST3	TRD@	RIMBP2	GRSF1	ZNF215	SRGAP3	ICA1	DEFA6
GSE17301_CTRL_VS_48H_ACD3_ACD28_STIM_CD8_TCELL_UP	http://www.broadinstitute.org/gsea/msigdb/cards/GSE17301_CTRL_VS_48H_ACD3_ACD28_STIM_CD8_TCELL_UP	Sig343	EPHA1	ARHGEF4	FAM173A	GTF2A1	SORT1	LPCAT4	SLC41A3	PRDX6	HPS6	ARNTL	TSPAN32	EFEMP2	TRAF5	MAGED1	MED17	SNRK	IQGAP2	TARS2	TDRD12	IGHM	CC2D1A	PRR7	RPL6	PRKAA2	METRN	ANXA11	BCL6	SIPA1L1	ANKRD17	PGD	ELOVL4	PCNX	TMEM41B	WDR19	HARS2	DPY19L1	SENP6	PPEF2	ABHD6	CRYGD	ITM2C	PHB2	ACACA	ZNF167	HAAO	BZRAP1	TACC1
GSE17301_CTRL_VS_48H_ACD3_ACD28_STIM_CD8_TCELL_DN	http://www.broadinstitute.org/gsea/msigdb/cards/GSE17301_CTRL_VS_48H_ACD3_ACD28_STIM_CD8_TCELL_DN	Sig344	CHCHD2	SRSF3	EXOC3L4	SLCO3A1	ISCU	GNA15	ZC3H12A	TNIP1	N4BP1	TLL1	ZC3H12C	NUPR1	PDE4B	MTMR14	MYD88	DIAPH2	MIF	SMPDL3B	PLA2G7	BCAT2	SLC25A10	RAD23B	STX11	SLAMF9	TMEM208	EHD1	ST18	TNFRSF11A	TNFSF9	UBE2F	MTX2	NFKBIA	CLMP	RNF19B	PION	NFKBIZ	GTPBP4	HSPA1B	GLRX	GCM1	FGD3	RAB20	KCNMA1	PDE4DIP	PDLIM5	CAV1	RAB1B
GSE17301_CTRL_VS_48H_ACD3_ACD28_IFNA5_STIM_CD8_TCELL_DN	http://www.broadinstitute.org/gsea/msigdb/cards/GSE17301_CTRL_VS_48H_ACD3_ACD28_IFNA5_STIM_CD8_TCELL_DN	Sig345	MFSD11	CNNM2	PMS2	FNIP2	ST3GAL2	LTC4S	MID1IP1	UBR7	CTAGE5	PCYOX1	MAN1C1	DGKH	PLEKHA1	RAB6B	LAMC1	TLR7	RCBTB2	DSCR3	LNX2	RAMP1	CDK19	SH3GLB1	S1PR1	PIP4K2C	CENPN	MPHOSPH9	CCNG2	SLC40A1	ABTB1	IL7R	CLK1	ATG2A	SOCS6	FBXO5	TNNI2	PURG	POGK	CNTN4	NCAPD2	FBXL8	KIF23	SFT2D2	NEK2	MIS18A	BCL2L11	GAPVD1	WDHD1
GSE17301_CTRL_VS_48H_ACD3_ACD28_IFNA2_STIM_CD8_TCELL_UP	http://www.broadinstitute.org/gsea/msigdb/cards/GSE17301_CTRL_VS_48H_ACD3_ACD28_IFNA2_STIM_CD8_TCELL_UP	Sig346	VPS28	FAM98B	LSM6	SRXN1	ABHD11	TRDMT1	ARMC1	SSSCA1	DYNLL1	CFP	WDR18	MRPL11	RNF14	ODC1	ZSWIM7	HSPA1A	CIB1	RASSF4	DUSP1	AKR1B15	LAGE3	C15orf63	SPG7	GMPPB	SEC22B	OST4	CSF2RB	TAL2	TMCC1	TRMT2A	ERH	NDUFS6	VCL	ANTXR1	PRDX2	SIGLEC7	PCDH7	IL1RN	LAT2	ARHGDIA	TMEM176A	DIAPH2	TREM1	FUBP1	FDFT1	CYSLTR1	STIP1
GSE17301_CTRL_VS_48H_ACD3_ACD28_IFNA5_STIM_CD8_TCELL_UP	http://www.broadinstitute.org/gsea/msigdb/cards/GSE17301_CTRL_VS_48H_ACD3_ACD28_IFNA5_STIM_CD8_TCELL_UP	Sig347	EVI2B	C9orf7	ARID1A	CEP55	ANKRD12	NCOR2	ATRX	AGER	FBXO25	FAM65A	YPEL3	FAM103A1	POLR3GL	CDCA2	MIB2	INSR	SMAGP	CDS2	CDK17	ARHGAP6	SDF2	ZCCHC6	TNFRSF13B	RAPGEF6	ATP1A3	KLHL24	KIF22	PHF21A	CTSA	OPHN1	SIRT7	AKAP10	43531	RNF167	OSBPL11	IL16	NAGA	GKAP1	TAOK3	BLMH	PLK1	MFSD11	RAPH1	RIN2	NMT1	MPP1	ID2
GSE23984_CTRL_VS_HYPOCALEMIC_VITAMIND_ANALOG_TCELL_UP	http://www.broadinstitute.org/gsea/msigdb/cards/GSE23984_CTRL_VS_HYPOCALEMIC_VITAMIND_ANALOG_TCELL_UP	Sig348	AFP	RFX5	CAPNS1	CPD	FKBP15	STX12	ABHD11	WDYHV1	CNIH4	MRPL45	PSTPIP1	RASIP1	KIAA0146	PECAM1	FASN	TMEM173	IPO13	SUN1	AARS	C1R	MAPRE1	ZDHHC5	CCT2	ARHGEF37	METAP1	VMP1	SLC25A12	AP1G2	TRAPPC2	DMXL2	PARK7	NUDT19	RC3H1	GPR132	ODC1	VHL	SLC37A4	CRELD1	ADRA2C	PCDH7	SLC6A13	TM7SF2	TUBA4A	CTSC	MED14	TRAF3	TCP10L
GSE23984_CTRL_VS_HYPOCALEMIC_VITAMIND_ANALOG_TCELL_DN	http://www.broadinstitute.org/gsea/msigdb/cards/GSE23984_CTRL_VS_HYPOCALEMIC_VITAMIND_ANALOG_TCELL_DN	Sig349	APLN	KIAA0430	REPS2	C5orf30	TMEM37	MYO1E	MAPRE2	SLC16A7	TAOK3	SGCB	SLC35C2	TPD52	TXNIP	TMEM135	GPNMB	NSMCE4A	DENND4C	FRMD6	ZKSCAN4	BRI3	MCOLN3	ST8SIA4	RIN2	TRIAP1	GRB2	MICAL1	SDCBP	HGSNAT	PSENEN	FAM107B	PIP4K2A	AKAP10	FCRL1	GALC	LPXN	SORD	CWC22	WIPF1	ABCD2	ST3GAL5	STAB2	SLC38A9	SEPP1	KTN1	SYF2	TMEM120A	DNASE1L1
GSE26290_CTRL_VS_AKT_INHIBITOR_TREATED_ANTI_CD3_AND_IL2_STIM_CD8_TCELL_DN	http://www.broadinstitute.org/gsea/msigdb/cards/GSE26290_CTRL_VS_AKT_INHIBITOR_TREATED_ANTI_CD3_AND_IL2_STIM_CD8_TCELL_DN	Sig350	SEMA4C	ADARB1	CAPG	STK40	MYO1E	LIF	GPR155	PWWP2B	MAML3	AGPAT9	EGFL6	LRRN3	ETV3	CD40LG	TRAFD1	RAP2B	CAMK2G	DGKD	ARHGEF6	NDFIP2	UBASH3B	CBR3	DNAJB2	ARRB1	CD48	KRT7	HAVCR2	LOC283174	ITPR1	GOLGA7B	PHF15	ST3GAL5	SELK	RGL4	NPTX1	SDCBP	DOCK9	SECTM1	GAS2L1	CALCOCO2	MOB1B	LACTB	GDPD5	ZAR1	FDPS	AMICA1	SERTAD2
GSE26290_WT_VS_PDK1_KO_ANTI_CD3_AND_IL2_STIM_CD8_TCELL_UP	http://www.broadinstitute.org/gsea/msigdb/cards/GSE26290_WT_VS_PDK1_KO_ANTI_CD3_AND_IL2_STIM_CD8_TCELL_UP	Sig351	IRF8	ATG5	C1GALT1C1	LOC100132741	IDH2	DNAJB1	FAM69A	ME3	RNF165	NUBP1	MPHOSPH6	DNER	TSPAN2	PLS1	CD97	LOC401068	CD59	PLXNB2	FAM53A	YWHAQ	CARD11	RFT1	BMP8B	CD38	FAM126A	CKLF	ISM1	ELF4	PRDM1	SLMO1	EFTUD1	TCEA2	TRAK1	CYP24A1	BRP44L	RGS3	FAM46A	SMARCA4	RTTN	VPS37B	G0S2	NRN1	CD14	TNC	MAP3K13	SPATS2L	C3orf52
GSE26290_CTRL_VS_AKT_INHIBITOR_TREATED_ANTI_CD3_AND_IL2_STIM_CD8_TCELL_UP	http://www.broadinstitute.org/gsea/msigdb/cards/GSE26290_CTRL_VS_AKT_INHIBITOR_TREATED_ANTI_CD3_AND_IL2_STIM_CD8_TCELL_UP	Sig352	LEPR	ADAMTS20	MEX3D	ZBBX	MATN1	POLQ	LOC100272228	PLA1A	FLJ11292	KDELR1	CDKAL1	PTPLA	ETHE1	SUV39H2	GGH	OR2H1	IL1B	ZNF8	CXCL3	CLEC5A	SERPINB9	KRT76	RAD51	COL15A1	SOX15	ADNP2	NUAK1	BBS10	EBI3	FAM175B	MNAT1	PLCB3	DKK2	SIKE1	GPM6A	ID2	AKR1D1	GCLC	IL21R	C7orf68	DDIT4	SLC28A3	AFF4	LY6G6E	SEC22B	EGR3	FAM64A
GSE26290_WT_VS_PDK1_KO_ANTI_CD3_AND_IL2_STIM_CD8_TCELL_DN	http://www.broadinstitute.org/gsea/msigdb/cards/GSE26290_WT_VS_PDK1_KO_ANTI_CD3_AND_IL2_STIM_CD8_TCELL_DN	Sig353	SFXN3	CCT7	ZFC3H1	CPB2	DVL3	LINC00312	ARFIP1	SERPINB7	USP6NL	SLC24A2	LRRC59	ASAP1-IT1	MOB1A	LOC642236	CYP4B1	FAM131A	CPSF7	ADRB1	SS18L1	CUZD1	CNOT1	KAT8	PCK2	DDX58	TH1L	GPATCH3	KIAA0240	GNMT	DYNLT3	SEC13	NOL10	TJAP1	NDUFAF3	GBAS	C12orf29	C6orf25	ULK1	RDH14	RNPEPL1	CTSH	ALCAM	ODF2	SLC25A46	RAB5B	KRT9	C6orf48	HDAC5
GSE25846_IL10_POS_VS_NEG_CD8_TCELL_DAY7_POST_CORONAVIRUS_BRAIN_UP	http://www.broadinstitute.org/gsea/msigdb/cards/GSE25846_IL10_POS_VS_NEG_CD8_TCELL_DAY7_POST_CORONAVIRUS_BRAIN_UP	Sig354	TMEM97	ATF7IP2	C7orf68	B4GALT2	NR4A2	BBS10	SLC28A1	FILIP1L	OR7E156P	BAG2	LRRC37A2	PNO1	CDT1	XPNPEP3	EPHX2	RFK	SLC25A38	PRRG1	ATF3	CDH19	GTF3C3	C3	CHRNA6	CCDC165	PLCB3	FAM75C2	ONECUT1	RUNDC3A	PRND	WWC2	SNTA1	CEBPZ	SCLY	VRTN	KRT76	NAG18	LOC644450	RBFOX1	LY6G6E	C1QTNF1	CXCL1	MC5R	BCL2A1	ST18	EGR3	PRAMEF10	LOC100129648
GSE25846_IL10_POS_VS_NEG_CD8_TCELL_DAY7_POST_CORONAVIRUS_BRAIN_DN	http://www.broadinstitute.org/gsea/msigdb/cards/GSE25846_IL10_POS_VS_NEG_CD8_TCELL_DAY7_POST_CORONAVIRUS_BRAIN_DN	Sig355	LOC642236	USP6NL	TBP	LPXN	CCT7	SCRIB	PRKRA	AOC4	PAQR4	LSM14B	GBAS	TBL3	CUEDC1	DERA	RAPGEFL1	HDAC3	CIB1	MAPK14	ALDH2	WDR44	GLT25D1	BCCIP	CPSF4	ASAP1-IT1	PIGH	POLE3	TDP1	SMO	LINC00312	NCAPD3	CRELD2	EIF3I	TOMM20	SFXN3	SIRT1	TH1L	BNC2	CHUK	RBMS2	C4orf29	KLF1	FCGBP	NDUFA7	TRAF2	ARFIP1	TTC13	HAUS2
GSE27092_WT_VS_HDAC7_PHOSPHO_DEFICIENT_CD8_TCELL_UP	http://www.broadinstitute.org/gsea/msigdb/cards/GSE27092_WT_VS_HDAC7_PHOSPHO_DEFICIENT_CD8_TCELL_UP	Sig356	MPRIP	ADH1C	GNG3	IFNAR2	ERN2	LRRC6	TNNT2	ABCC8	LYL1	SRXN1	ST8SIA3	CASQ1	LAS1L	GAR1	ARIH2	LTF	POLE3	RBL2	PPT2	SH3GL3	IGFBP3	REEP1	RPL15	C1orf43	CRTAM	CHRNA7	ABHD8	SERPINB5	C20orf111	MED1	CLIC4	CCNB1IP1	PLAT	JUND	ONECUT1	ADRB1	CCNF	TUSC2	CP	TNNT3	CHRNB1	SLC2A4	CYP2F1	HRC	PGAM2	PTGIR	LY6G6D
GSE27092_WT_VS_HDAC7_PHOSPHO_DEFICIENT_CD8_TCELL_DN	http://www.broadinstitute.org/gsea/msigdb/cards/GSE27092_WT_VS_HDAC7_PHOSPHO_DEFICIENT_CD8_TCELL_DN	Sig357	DCLRE1A	ZKSCAN3	ZBTB45	PTHLH	RER1	TCEB1	UBD	REXO2	SLIRP	TXNIP	PSMB10	MRPL2	DGUOK	RPS11	PCDHA12	MME	HTR2B	C9orf64	MGST1	NUDT4	SULT1B1	S100PBP	NAT2	TSNAX	C11orf83	GBAS	LSM3	NAV2	IRAK1	STRBP	PSMC3IP	APOBEC1	NUP93	SERPINE1	NDE1	SCAND1	SHOC2	SAMHD1	RPA2	MRPL36	NME1	CNN2	MED10	SRP9	CLTA	ATP11A	SLC7A6
GSE22443_IL2_VS_IL12_TREATED_ACT_CD8_TCELL_DN	http://www.broadinstitute.org/gsea/msigdb/cards/GSE22443_IL2_VS_IL12_TREATED_ACT_CD8_TCELL_DN	Sig358	FADS1	RPA1	SMYD1	GNS	CNOT3	PDE6G	CWC15	PPP1R14B	RYR1	BCL7C	STAG1	LSM2	OLFM1	RPL15	PRR5	NCAPH	GLI1	ZNRD1	PIK3CD	STK10	NOP10	NNT	CCR2	CCL22	UGT8	NAA35	RPS8	RAD51AP1	REXO2	FRG1	LCP1	GRN	DAGLB	TRIM27	PPP1R21	SEPW1	TWF2	HTR1A	HLA-DMA	MX2	CLDN8	HMBOX1	KDM1A	SELL	CKS1B	TCP1	PPP1R12C
GSE22443_NAIVE_VS_ACT_AND_IL2_TREATED_CD8_TCELL_DN	http://www.broadinstitute.org/gsea/msigdb/cards/GSE22443_NAIVE_VS_ACT_AND_IL2_TREATED_CD8_TCELL_DN	Sig359	MST1R	KRT12	TMEM43	TSC22D1	IL9	OSTalpha	SLC5A1	ANKRD1	SEZ6	CMTM8	COL14A1	VOPP1	HDLBP	CDR2	P4HA2	BTBD3	CPD	CAPN5	ABCD3	TRIM13	HMOX1	CFTR	TNNI1	TEK	FAM83G	FN1	SEC61A2	BMX	TGFB3	SAMD10	SFN	IFITM3	PIGR	SLC22A17	C19orf48	BEX4	PAPSS1	ANKH	CTSL2	S100A1	C5orf32	MLF1	BIRC2	ALDH1A3	HADH	KRT86	LXN
GSE22443_NAIVE_VS_ACT_AND_IL12_TREATED_CD8_TCELL_UP	http://www.broadinstitute.org/gsea/msigdb/cards/GSE22443_NAIVE_VS_ACT_AND_IL12_TREATED_CD8_TCELL_UP	Sig360	FLI1	INPP4A	LOC152217	TBP	MXI1	CCDC93	TLN1	HINT1	PPIH	RPUSD4	MR1	CTDSP2	EVL	CLPX	PIK3R1	C20orf27	CORO1C	ATG7	XPOT	SMARCD1	FGR	SEPX1	TCF3	ADCY4	BCL7B	SIRT2	GNA12	HS1BP3	ZEB1	DHRS3	PECAM1	LMO4	SLC7A8	C17orf62	SRPK3	GATA1	USP29	RCC1	TEX9	SLC3A2	TOP2A	ARRB1	CENPV	PTPRE	OXCT1	TMEM97	EPB41L2
GSE22443_NAIVE_VS_ACT_AND_IL2_TREATED_CD8_TCELL_UP	http://www.broadinstitute.org/gsea/msigdb/cards/GSE22443_NAIVE_VS_ACT_AND_IL2_TREATED_CD8_TCELL_UP	Sig361	CDR2	RBBP7	PDLIM4	PDE9A	KRT12	DNAJB1	GUCY2C	PLG	SLC12A3	CYB561	FERMT2	PDS5B	CPXM2	HBE1	PLD1	ENTPD2	FEZF2	LIMS3L	CRYAA	OSTalpha	ZG16	MLF1	NDRG4	WFDC2	MED10	PRPH	TNNC1	FAM3D	CALML5	TNF	INHBB	VWF	PTPRG	C17orf48	TSPAN6	RGNEF	LIMA1	GIPC2	SOX7	NFKB2	DDX5	MST1R	CCL17	CA8	TNNI1	CRHR1	PXK
GSE22443_IL2_VS_IL12_TREATED_ACT_CD8_TCELL_UP	http://www.broadinstitute.org/gsea/msigdb/cards/GSE22443_IL2_VS_IL12_TREATED_ACT_CD8_TCELL_UP	Sig362	CYP11B2	STAC	RNF126	LIPF	SLC35F2	GJB5	TRIM42	SYCE1L	TRIM71	CLCNKB	TMEM102	TMEM130	PIP5KL1	FAM83F	ALDH7A1	TEX261	DBNDD2	PPP4R4	C13orf16	TNFAIP8L1	C17orf97	P2RX3	RGL1	MOGAT1	C9orf71	LYZL4	ATP5SL	DYRK3	SUDS3	FOLR1	NKPD1	CXCL13	KIAA1456	SLC26A5	HRG	MFN2	SLC4A11	TEX101	TMEM44	BRD8	ZNF750	FOXD2	LOC155060	SLFN13	RNASEH2C	KRT20	CLDN16
GSE22443_NAIVE_VS_ACT_AND_IL12_TREATED_CD8_TCELL_DN	http://www.broadinstitute.org/gsea/msigdb/cards/GSE22443_NAIVE_VS_ACT_AND_IL12_TREATED_CD8_TCELL_DN	Sig363	DCAF17	PAPPA2	C2orf88	AVEN	MB21D1	GCAT	PTPRM	TRAT1	ATP1B3	GUCY2C	CAPN9	NEURL	LOC389493	DISP1	GTF2H1	RAB1A	TIPRL	ZCCHC2	RPN1	C9orf41	MAPRE1	CEP57L1	TMEM161B	CLP1	EIF2B3	SSPN	MLF1IP	BTD	ST18	ACTC1	MORC2	EEPD1	IMP4	KCNE3	TMEM181	WDR45L	UMODL1	PGM5	TRIM66	ZNF18	MAB21L3	GNPDA2	SEC24D	SGTA	MED7	IL1RL1	FTSJD2
GSE25502_WT_VS_KLF13_KO_THYMIC_MEMORY_LIKE_CD8_TCELL_UP	http://www.broadinstitute.org/gsea/msigdb/cards/GSE25502_WT_VS_KLF13_KO_THYMIC_MEMORY_LIKE_CD8_TCELL_UP	Sig364	MINPP1	LOC100128178	CD226	ACBD6	SLC10A4	LCN12	C16orf57	ANKLE1	PSTPIP2	MARK1	ASAP1-IT1	PDXDC2P	KSR1	NUMBL	TAF1A	TPTE2P6	TMEFF1	SYTL1	SLC41A2	CD302	KLC1	KHNYN	ASB2	ISG20L2	MAPK1	SSBP1	RGS3	ENPP5	PTGR2	AIM1	PCNXL2	ZNF662	PTPRN2	LOC284385	WDR96	HEG1	KCNQ5	RPGR	ITSN2	CCDC144B	TGM2	MS4A7	RPIA	MSTN	AAGAB	TNFSF10	PLA1A
GSE25502_WT_VS_KLF13_KO_THYMIC_MEMORY_LIKE_CD8_TCELL_DN	http://www.broadinstitute.org/gsea/msigdb/cards/GSE25502_WT_VS_KLF13_KO_THYMIC_MEMORY_LIKE_CD8_TCELL_DN	Sig365	TCERG1L	RAI1	LOC100506274	MARCO	LOC100131581	LOC147646	PACS2	C4orf49	SEC14L2	ASB14	SCD	PVRL4	CRYBB1	C2orf27A	PRB4	SEMA6C	LOC283728	WNT5A	PCDHGA10	DRD5	SSH2	LAMC3	ZBTB46	POSTN	COX7B2	OR2C3	MUC2	SREBF2	GPR4	LINC00483	C13orf30	KAZALD1	TEAD3	KIR3DL1	LRRTM1	LOC553137	C20orf160	NMNAT2	FAM108A1	ZFP2	RGMB	PLCL1	OLFML1	SPAG8	PRB1	THBS4	LOC100329135
GSE23321_EFFECTOR_MEMORY_VS_NAIVE_CD8_TCELL_UP	http://www.broadinstitute.org/gsea/msigdb/cards/GSE23321_EFFECTOR_MEMORY_VS_NAIVE_CD8_TCELL_UP	Sig366	EN2	NNAT	STARD3	NFIA	CHST3	TCTA	SERPINI2	TWISTNB	SLC11A2	HIST1H4B	CYP2C9	SKIL	RSC1A1	PIR	KRT81	PLIN3	GALNT2	CDIPT	SCHIP1	PTENP1	CYLC1	LY6E	UPK2	FADS3	AGXT	CFH	MT1G	PDE12	LEPROT	VAT1	RIMBP2	RGL1	NEU1	SV2A	C4orf10	DNAH17	PTPRZ1	BASP1	TYMP	PLEK	GRIN2B	ULK2	HOXB13	DOCK9	FARP2	RFPL3-AS1	FLNA
GSE23321_CD8_STEM_CELL_MEMORY_VS_EFFECTOR_MEMORY_CD8_TCELL_UP	http://www.broadinstitute.org/gsea/msigdb/cards/GSE23321_CD8_STEM_CELL_MEMORY_VS_EFFECTOR_MEMORY_CD8_TCELL_UP	Sig367	HIST1H2AM	TOM1	ANXA7	FARSA	CPVL	TBC1D1	BAG2	MARCKS	P2RX4	TUFM	RNF13	TRAF4	ZNF202	ADO	USP13	KATNA1	BCL2A1	CHUK	GPR6	PDE8A	NUTF2	PLXNC1	ADRBK2	GHR	SPEN	TADA2A	SNAP25	LRRN3	EBP	CCDC85B	INTS3	MOXD1	MAPRE3	BRMS1	VPS13A	CASP4	AJAP1	GPR50	LARP4B	PSMF1	SPA17	SERPINB3	NFIL3	HERC3	ALDH9A1	MPRIP	SHB
GSE23321_CD8_STEM_CELL_MEMORY_VS_EFFECTOR_MEMORY_CD8_TCELL_DN	http://www.broadinstitute.org/gsea/msigdb/cards/GSE23321_CD8_STEM_CELL_MEMORY_VS_EFFECTOR_MEMORY_CD8_TCELL_DN	Sig368	SLBP	ERCC1	GTF3C1	UBB	TAX1BP1	HTATSF1	MAPK3	UPP1	PCF11	PSMD8	LPIN1	RNF11	HERC3	ACLY	RGS19	PEX3	ALDOA	MDH1	C10orf28	PDXK	MEF2C	BICD2	IL1R1	SSBP1	RAB33A	UQCRQ	DPYSL2	FRMD4B	RABEPK	DYNLT1	TDP2	KIF23	LAPTM4A	PIEZO1	PDK3	KPNB1	FURIN	GPNMB	MAP4	ZFP36	KIF11	FOSL2	TUBGCP2	STXBP2	CEBPB	PSMG1	CHRNA6
GSE23321_CENTRAL_MEMORY_VS_NAIVE_CD8_TCELL_DN	http://www.broadinstitute.org/gsea/msigdb/cards/GSE23321_CENTRAL_MEMORY_VS_NAIVE_CD8_TCELL_DN	Sig369	CDK20	ATP2B3	DPF2	LOC646934	COL4A5	FST	RWDD2A	HSD17B6	LY6E	MYH15	LCN1	PTPRN	GPR12	ARHGAP22	CACNA1C	CDKL5	HRG	KIFAP3	PICK1	AGFG2	ZNF202	DNASE1L2	TRPV6	LOR	C16orf7	ITGB4	LOX	NOP2	TAF13	CYP2C18	ANGPT1	TRPC2	NKX2-5	MGA	FAM149A	RBM17	ERICH1	TEAD1	TRAK2	FZD2	GNGT1	LY6G6C	RRH	ALPI	GPR50	LRIG2	AATK
GSE23321_CENTRAL_VS_EFFECTOR_MEMORY_CD8_TCELL_UP	http://www.broadinstitute.org/gsea/msigdb/cards/GSE23321_CENTRAL_VS_EFFECTOR_MEMORY_CD8_TCELL_UP	Sig370	ABCB1	ST8SIA4	TGM2	KHDC1L	PROP1	MRPS6	TUSC2	LCLAT1	AHR	C9orf3	ESCO1	FANCC	TMEM68	CDS2	RPS6KC1	SSPO	NFIL3	ANGPTL2	NRP1	PTGER2	NAB2	C1orf63	SF3A1	SCAF4	HEY1	KIF13A	PANX1	NPC1	LRRC49	ARSI	GPM6B	CST7	CASP1	TBXA2R	PMVK	KCTD5	RILPL2	SLFN12L	ENDOD1	RAB20	SESN2	GCC1	CDC5L	SLC7A3	TIMP2	TTN	MTF1
GSE23321_CENTRAL_VS_EFFECTOR_MEMORY_CD8_TCELL_DN	http://www.broadinstitute.org/gsea/msigdb/cards/GSE23321_CENTRAL_VS_EFFECTOR_MEMORY_CD8_TCELL_DN	Sig371	ELOVL7	MRPS2	MTIF2	NME4	CTSD	CACNA2D2	BCAS2	HNRNPH1	CRYBA2	CCDC59	CPNE6	FAM116A	ZDHHC12	RPL11	TCTA	KIF2A	ADAT2	HAL	ACYP1	NDUFA10	SPICE1	BLOC1S3	MDM1	PARP16	TAF13	CXCR6	KRAS	RPL36	PTCD2	SLC7A6	PSTK	RABEP2	SLC27A4	YWHAZ	PRPF19	TCEAL8	DDX20	RNF187	ABHD8	ADH5	METTL9	43526	CCDC71	FOPNL	NEDD4L	ACADM	WLS
GSE23321_CENTRAL_MEMORY_VS_NAIVE_CD8_TCELL_UP	http://www.broadinstitute.org/gsea/msigdb/cards/GSE23321_CENTRAL_MEMORY_VS_NAIVE_CD8_TCELL_UP	Sig372	DNAJC5	RTEL1	EGR1	LRRC20	GAB1	FASTKD5	PELO	ADHFE1	VEZT	ABT1	ENTPD1	FNIP2	NFE2	CPLX1	PIGC	GALNS	MRPL37	SLC2A3	CXCL3	CWC22	PHLDA1	ITGA2B	AK8	GNA12	ATP6V1E2	TYROBP	LCN2	C14orf43	LTF	SLC39A4	RASGRP2	TMEM66	PYCR1	ICMT	TMEM120A	MID1IP1	NFKBIZ	FAM162A	CLEC1B	SPP1	S100A9	ANO6	STK10	ABCA1	CREG1	CHI3L1	HSD17B2
GSE23321_CD8_STEM_CELL_MEMORY_VS_CENTRAL_MEMORY_CD8_TCELL_UP	http://www.broadinstitute.org/gsea/msigdb/cards/GSE23321_CD8_STEM_CELL_MEMORY_VS_CENTRAL_MEMORY_CD8_TCELL_UP	Sig373	ANGEL2	ZMAT2	C9orf152	PPP1R3A	CLDN16	MAP9	PRLR	TSHZ3	CD72	WNT5B	CLCF1	CCDC64B	ALX1	LIMK1	C5orf22	ADAMTS19	TNFAIP6	PTRF	TMEM8A	SCN2A	WDR16	C10orf81	CAMKV	TMEM120B	GABRE	SGPP2	CNST	INSM1	ACVR1C	C19orf33	STAT5A	CBX2	SNX16	SPRED3	PPP1R39	SPZ1	SCRN1	MCF2L	YIF1B	SDPR	C12orf65	IRF4	ROR2	OR52N4	CLDN2	COG1	BEND6
GSE23321_CD8_STEM_CELL_MEMORY_VS_CENTRAL_MEMORY_CD8_TCELL_DN	http://www.broadinstitute.org/gsea/msigdb/cards/GSE23321_CD8_STEM_CELL_MEMORY_VS_CENTRAL_MEMORY_CD8_TCELL_DN	Sig374	CAPNS1	C14orf1	PARP10	RANGRF	RAB3GAP2	TRAM1	C8orf44	CREBBP	NDE1	LOC100134937	APOLD1	TRIM11	TPR	TXN2	ATRN	NUP210	CDC14A	HERC5	KIAA0430	CCDC92	HNRNPH2	MIA3	ACAT2	SEPX1	HIRIP3	C16orf62	C11orf2	EBP	TBCC	ZNRF2	SRPK2	PPP2R5D	PI4KB	UBAC2	CAMK1D	GSR	POLG2	FBXL14	DNTTIP1	ATP6V1G1	LRMP	LOC100131067	ZDHHC13	TMX3	DNASE1L1	SAC3D1	MFNG
GSE23321_CD8_STEM_CELL_MEMORY_VS_NAIVE_CD8_TCELL_UP	http://www.broadinstitute.org/gsea/msigdb/cards/GSE23321_CD8_STEM_CELL_MEMORY_VS_NAIVE_CD8_TCELL_UP	Sig375	USP16	C4orf43	GCN1L1	LOC90784	CCT6A	THOP1	DPM1	SNHG1	MCOLN2	HNRNPA1	ACRC	NCS1	MT1G	PELP1	UBE2E3	ZNF295	HSPH1	PRKDC	MLF1	LOC400236	GRIN2C	USP37	YBX1	FLJ40288	AGFG1	NFYA	CACNA1A	AFG3L2	GPN2	NAA25	LOC100507564	NFIL3	LOC284454	LOC149401	LETM1	RPIA	SLC35B1	EXTL2	STX6	IKBIP	PSMD2	TBX6	MRAP	NANP	NDUFAF3	RHOB	C12orf29
GSE23321_CD8_STEM_CELL_MEMORY_VS_NAIVE_CD8_TCELL_DN	http://www.broadinstitute.org/gsea/msigdb/cards/GSE23321_CD8_STEM_CELL_MEMORY_VS_NAIVE_CD8_TCELL_DN	Sig376	PGPEP1	PCNT	CSK	AIDA	ZNF33A	CCDC109B	LOC282997	FAM134C	OSTF1	NUDT16L1	MAN1B1	DNASE1L1	C1orf38	SIDT2	RBL1	HNRNPU-AS1	PRMT2	SSH2	CCPG1	TSNAX	RPS6KA5	UQCR10	TMEM179B	CD99L2	ZFP62	LOC284926	FAM8A1	YIPF1	INO80E	EPB41	MGAT4A	LBR	SLC30A6	TADA3	FBXL17	PDE6D	NCKAP1L	CEP192	C21orf33	AP1G2	CRIPAK	BTN3A2	ZZEF1	B3GALT4	TRIM38	ABCC5	C14orf159
GSE23321_EFFECTOR_MEMORY_VS_NAIVE_CD8_TCELL_DN	http://www.broadinstitute.org/gsea/msigdb/cards/GSE23321_EFFECTOR_MEMORY_VS_NAIVE_CD8_TCELL_DN	Sig377	CRIM1	KPNA1	NAA20	PHLPP2	OTUD7B	PIM2	SRR	NUP188	TCP1	SMOX	CDKN3	C1orf52	PGAM5	C17orf79	SLC19A2	FEM1A	MRPS30	CSNK2A1	TIPIN	NAB2	METTL19	TET3	C12orf41	SDF4	SLC30A3	ZDHHC16	TRAF1	SOCS4	SLC3A2	WBSCR22	OTUD4	AMD1	WDR3	IL12A	EBNA1BP2	ADPGK	MIR21	C12orf49	PITPNB	UTP20	SDCBP	CCDC64	CSF1	SPAG1	EIF3B	SEL1L	UMPS
GSE27291_0H_VS_6H_STIM_GAMMADELTA_TCELL_UP	http://www.broadinstitute.org/gsea/msigdb/cards/GSE27291_0H_VS_6H_STIM_GAMMADELTA_TCELL_UP	Sig378	LINC00202	HSF4	MASP2	CCDC22	CHTF8	SLC15A2	KCNE3	NSUN4	LOC100128554	POTEKP	CLRN3	AHSA1	ZNF175	SRSF5	NSUN5	WDR69	PFKL	KDM4C	LSM12	ARGLU1	BTK	TMEM39B	CYSLTR1	C16orf62	SNTG1	H2AFY2	ZNF738	KCTD18	NSUN5P2	PIP5K1A	DDX55	GAPDHS	TMEM31	SYCN	SLC14A1	43709	SDF4	CA5BP1	HTR5A	C22orf43	CD160	ZNF485	DEFB114	ANKRD13B	IL17RC	FMNL2	SERPINB7
GSE27291_0H_VS_7D_STIM_GAMMADELTA_TCELL_UP	http://www.broadinstitute.org/gsea/msigdb/cards/GSE27291_0H_VS_7D_STIM_GAMMADELTA_TCELL_UP	Sig379	LOC100293705	SLC7A11	MLYCD	GLI3	CXCR4	ERMN	WIPI1	MTMR9	PSME4	ARHGEF9	C7orf50	FECH	LOC283585	E2F6	BCL6	ATG2B	AP4B1	SLC3A1	CD3D	USP7	TRD@	SMYD3	XIAP	RASL12	HPGD	MOGS	LOC644656	CASC5	CCDC91	C3AR1	SHE	TCP10L	GMFG	CHD9	ZNF671	GOLIM4	GPNMB	ASB10	DNAJC1	FBXO28	PBLD	CCDC90B	STAG3L4	IRAK2	RELN	SLC22A4	GADD45A
GSE27291_0H_VS_6H_STIM_GAMMADELTA_TCELL_DN	http://www.broadinstitute.org/gsea/msigdb/cards/GSE27291_0H_VS_6H_STIM_GAMMADELTA_TCELL_DN	Sig380	TBC1D4	RGS22	UTP20	AXIN2	LINC00478	LOC283682	UQCRC2	PML	UNC119	CHIA	OGFOD1	LOC390998	NME5	NDUFAB1	OCEL1	ATP1A4	PRKCA	KCNU1	MRPL20	MICA	NGB	SNRPC	MUC19	TMEM114	ERVMER34-1	ZNF174	TRA2B	JMJD5	MRPL24	ASXL2	RPS17P5	SLC27A5	SPATC1	LOC283854	CTSO	FAM133A	MEG3	ALDOB	FLJ12825	CRTAC1	TBX6	PPAP2B	WDR46	FAM169B	PAGE4	METAP2	SUV39H1
GSE27291_0H_VS_7D_STIM_GAMMADELTA_TCELL_DN	http://www.broadinstitute.org/gsea/msigdb/cards/GSE27291_0H_VS_7D_STIM_GAMMADELTA_TCELL_DN	Sig381	TRD@	LOC100293705	TRAC	RPS6KA5	GATS	ATP11C	RAP1B	SGSM2	HORMAD1	ZFAND6	ITPR3	BTG2	ZBTB11	MEX3C	SP4	LNX2	RBMX	ZNF606	C16orf72	ARNT	WDR44	PHIP	MXRA7	LOC100133109	SSX2IP	ADAM10	USP9Y	ZNF134	SLC25A25	C20orf112	TRA@	43719	PRO2214	LOC100132999	ESYT1	FAM46C	TFRC	ARHGAP9	MEGF9	UPP1	FAM111A	HELZ	CCNI	PIK3CA	DENND1B	LTB	DENND4C
GSE27291_6H_VS_7D_STIM_GAMMADELTA_TCELL_UP	http://www.broadinstitute.org/gsea/msigdb/cards/GSE27291_6H_VS_7D_STIM_GAMMADELTA_TCELL_UP	Sig382	PDCD6IP	COPS6	RABL3	PFKL	IPO4	TAAR5	CENPK	FAM46D	QSOX1	ZNF92	MRPL42	MYH2	LGALS1	POTEKP	B7H6	RBM7	GPATCH3	C11orf24	EML2	ADAM11	TM7SF2	EIF4H	NNT	TMEM123	KIAA0100	ZNF692	C14orf142	ARAF	GLCE	TRPV2	TMEM106B	TCP1	SNTG1	PDCL2	RETNLB	SLC19A1	TARP	SRSF5	TTC6	SERPINB1	RGS9BP	SNAPC3	C14orf21	TMX1	NRG4	CYP24A1	CAPRIN1
GSE27291_6H_VS_7D_STIM_GAMMADELTA_TCELL_DN	http://www.broadinstitute.org/gsea/msigdb/cards/GSE27291_6H_VS_7D_STIM_GAMMADELTA_TCELL_DN	Sig383	DKFZP586I1420	TCF4	CASC5	GOLIM4	OCLN	LOC100293705	ADAL	NCK1	SGSM2	CCDC91	AIPL1	SLC25A45	LOC401324	FCGR2B	FAM13A-AS1	IGF1	BTN3A1	CHD9	MC3R	CXCR4	TGOLN2	ADAMTS15	WDR45L	RASAL3	CCDC27	ZZEF1	NTRK2	DCBLD1	NCOA2	TCF19	HAVCR1	LOC646870	PARS2	TRIB1	SPG7	DMPK	LOC100288225	PDE4B	HIST1H2BC	LIN7B	RGS1	PBLD	CRHBP	DKFZp667F0711	PLEKHO1	CTRL	PPIF
GSE29164_UNTREATED_VS_CD8_TCELL_AND_IL12_TREATED_MELANOMA_DAY3_UP	http://www.broadinstitute.org/gsea/msigdb/cards/GSE29164_UNTREATED_VS_CD8_TCELL_AND_IL12_TREATED_MELANOMA_DAY3_UP	Sig384	GLT8D1	VAT1L	CCT3	CXCL16	SOAT2	MYRIP	ZNF777	PPM1E	RNF135	ZNF32	PVRL4	PORCN	COMMD9	G6PC3	GADL1	MYO1E	SLC25A23	MUL1	GKAP1	ZNF862	COMP	PDE4DIP	ATP6V0C	PLA2G16	GCNT1	ZFP62	ELAVL4	CNPY3	MED31	SFTPC	XPO5	ZFP37	ABHD14A	METTL18	IDUA	C1orf122	PTBP1	CLPTM1	EEFSEC	CALML4	KCP	DYNLT3	PPFIA4	HS6ST1	AUP1	NFIB	EPAS1
GSE29164_UNTREATED_VS_CD8_TCELL_AND_IL12_TREATED_MELANOMA_DAY3_DN	http://www.broadinstitute.org/gsea/msigdb/cards/GSE29164_UNTREATED_VS_CD8_TCELL_AND_IL12_TREATED_MELANOMA_DAY3_DN	Sig385	ERCC6L	WDR11	MCM4	PPA1	SGPP1	LSR	FLOT2	ITGB2	HELLS	STAP1	TTF1	WDR61	API5	INPP5B	OSBPL3	EPS8	UPB1	NOA1	OGT	YWHAQ	NCEH1	FUT7	ANKH	MTMR14	FBXO3	AP1G2	WDR3	STK36	SIRT1	RAB7L1	PRRC2C	PXMP2	SEMA4A	NIPSNAP3A	TNRC6B	TUBA4A	NCOA1	PWP1	HMGN5	OGDH	KIAA0196	TRIM33	TAF2	RNF144A	PRDX6	RPE	RAF1
GSE29164_UNTREATED_VS_CD8_TCELL_TREATED_MELANOMA_DAY3_DN	http://www.broadinstitute.org/gsea/msigdb/cards/GSE29164_UNTREATED_VS_CD8_TCELL_TREATED_MELANOMA_DAY3_DN	Sig386	MSN	SIDT2	DOCK10	MAP3K5	ITPR3	CEBPD	AEBP2	IGSF6	CTSS	LRRC33	IL7R	GPR155	PTPN6	MYO1E	CYBA	FILIP1L	PRKCB	CNPY4	GPR183	SASH3	SLC25A37	ITGB3	PANX1	AKAP13	RGS3	MADD	RSAD2	NAPSA	CD47	ARSK	CHKA	DARC	IFIT1	MYCBP2	GSN	SLC44A1	GRAP	C12orf10	ASB2	SHISA5	ACOT7	RBM43	CADM3	DNAJC22	SERPINI1	SETD6	DGKD
GSE29164_DAY3_VS_DAY7_CD8_TCELL_TREATED_MELANOMA_UP	http://www.broadinstitute.org/gsea/msigdb/cards/GSE29164_DAY3_VS_DAY7_CD8_TCELL_TREATED_MELANOMA_UP	Sig387	TP53RK	LSM2	PAX4	CYLD	UBN1	SLC25A25	SNPH	DDX11	CYBA	DOK7	TCTEX1D2	RARG	GABRP	MIA	JAK3	GJB1	LOXL4	ARFIP2	AHSG	ERLIN2	ZNF217	CAPZB	COL6A2	FAM175A	LIME1	N4BP2L1	RANBP3L	DNM2	KHNYN	SETD5	UPK1B	KCNK16	AKAP6	CLASRP	CYP2A6	XPNPEP2	LBR	CACNG8	TSPAN9	HDAC10	MARVELD3	TNFRSF4	UBR2	RALY	CMIP	KIF15	ST8SIA6
GSE29164_UNTREATED_VS_CD8_TCELL_TREATED_MELANOMA_DAY3_UP	http://www.broadinstitute.org/gsea/msigdb/cards/GSE29164_UNTREATED_VS_CD8_TCELL_TREATED_MELANOMA_DAY3_UP	Sig388	DGCR6	CYB5A	PRKD3	TOX4	GALNT7	GPR160	HSPB11	ARMCX3	TLE1	USP47	SDC3	ARAP1	GUSB	DPP7	APTX	ST8SIA4	RNF19A	MTSS1	TTC32	MRPL52	ZNHIT6	MBTD1	SEC11C	GFOD1	NUDT19	CYP4V2	MBOAT1	SLC39A1	TSPAN33	GALK1	FARP2	TLE6	PDLIM7	UXT	PPP2R5A	PRKAB2	C5orf30	AKR1B10	STX8	CPNE3	DMPK	SERPINF1	METTL23	CSNK1G3	NDUFB9	FRMD4A	TOP1MT
GSE29164_DAY3_VS_DAY7_CD8_TCELL_AND_IL12_TREATED_MELANOMA_DN	http://www.broadinstitute.org/gsea/msigdb/cards/GSE29164_DAY3_VS_DAY7_CD8_TCELL_AND_IL12_TREATED_MELANOMA_DN	Sig389	LOC100505841	S1PR1	SLC5A5	HSD17B8	KCNE1L	LIX1	PPFIA4	SYCN	OR52A1	KRT80	NACC1	RAB1B	LRFN1	NGF	MPPED1	PDGFC	KDM6B	PPIL2	HLA-DRA	TAP2	TNXB	SYPL2	LY75	FNDC5	MDH2	LYPLA2	HECTD2	GPR45	ZFPM2	NOP16	STK32C	CSF3	ZFP37	HGS	ITPR3	ARHGEF25	KRT72	PDZK1IP1	DCDC2	SERPINB2	CDC42EP2	CD244	TP53I11	DNM2	COL1A2	GGT5	ATP5O
GSE29164_CD8_TCELL_VS_CD8_TCELL_AND_IL12_TREATED_MELANOMA_DAY3_UP	http://www.broadinstitute.org/gsea/msigdb/cards/GSE29164_CD8_TCELL_VS_CD8_TCELL_AND_IL12_TREATED_MELANOMA_DAY3_UP	Sig390	RNF169	MED13	DAXX	TXNDC5	KIAA1468	ZBTB5	IL15	PPP1R15B	PCIF1	CNOT2	HIST1H3D	SUCLA2	LRRC45	BRD7	MCTP1	KIAA1737	ACOT11	ZDHHC7	RUVBL1	NPAT	TMEM159	NECAP1	FICD	URB2	ATP7A	PTPRA	HMG20A	RHOQ	TUBA4A	SETD8	HMBS	TRIO	ATP6V1E1	MTOR	DBT	DIP2A	ITM2B	UNKL	PIEZO1	RINT1	BRK1	MMGT1	FAM160B2	KLHL15	PAPD7	RNF2	USP38
GSE29164_DAY3_VS_DAY7_CD8_TCELL_TREATED_MELANOMA_DN	http://www.broadinstitute.org/gsea/msigdb/cards/GSE29164_DAY3_VS_DAY7_CD8_TCELL_TREATED_MELANOMA_DN	Sig391	PION	C14orf45	NUDT15	ATXN2L	FAM98C	GLT8D2	PECAM1	CASR	AHSG	AMBRA1	SNX8	ECE1	LEPREL4	UGGT2	BID	PSAP	FLT3	DBN1	GPBP1L1	ERCC2	ARFIP2	TMEM80	GABRP	LFNG	EVL	ITGAX	AMTN	VHL	DOK7	ZC3H12D	PPY	SOX12	TSEN34	TOMM6	NAIF1	CNR2	CD38	TMLHE	EFHD2	DNA2	MBTPS1	DECR2	LENG8	TM4SF5	NOD1	LDOC1L	ADAMTSL2
GSE29164_DAY3_VS_DAY7_CD8_TCELL_AND_IL12_TREATED_MELANOMA_UP	http://www.broadinstitute.org/gsea/msigdb/cards/GSE29164_DAY3_VS_DAY7_CD8_TCELL_AND_IL12_TREATED_MELANOMA_UP	Sig392	RCOR3	NDRG1	PVT1	ELL3	NFE2	L1CAM	MGST2	CHD7	GPR155	ABTB2	POLG2	ARHGEF3	ZFHX3	FNTA	MBTD1	CCDC88A	CCR2	IL7R	C17orf109	USP18	FKBP1B	YDJC	TET2	QARS	CCT6A	CD300C	DYNLT3	ZC3HAV1	MEX3B	PEX13	FKBP3	C19orf12	DENND4A	RNF24	SEPX1	SEMA4C	MRPL16	SMOX	INSIG1	PARD6A	CD84	ABCG2	HSD17B12	LY86	RNF115	MAN2A2	VEGFC
GSE29164_UNTREATED_VS_CD8_TCELL_TREATED_MELANOMA_DAY7_DN	http://www.broadinstitute.org/gsea/msigdb/cards/GSE29164_UNTREATED_VS_CD8_TCELL_TREATED_MELANOMA_DAY7_DN	Sig393	ATP1A2	RPS9	SYCN	SELO	HLA-DRA	AIF1L	OR52A1	PLEKHO2	NOL12	SF3B3	ACCN4	KIAA0284	SLC31A2	ZDHHC14	ARMCX2	NCKIPSD	SLC29A4	RBFOX1	TCTN2	CYP8B1	CNN1	FAM162A	SEMA6C	PRR9	APOD	THSD7B	STARD3NL	EFHD2	STS	SMAD7	UBE2L3	PDZD11	BCAT2	ARID3B	CMTM5	LIM2	RGNEF	TSPAN18	PSMG4	SCNM1	DNMBP	SERPINE1	ZNF358	DCTPP1	C9orf150	SLCO5A1	COL25A1
GSE29164_UNTREATED_VS_CD8_TCELL_AND_IL12_TREATED_MELANOMA_DAY7_UP	http://www.broadinstitute.org/gsea/msigdb/cards/GSE29164_UNTREATED_VS_CD8_TCELL_AND_IL12_TREATED_MELANOMA_DAY7_UP	Sig394	RNF168	PCIF1	TNRC6B	POLR3F	PDZD8	YTHDF2	MSRA	CNOT2	ZMAT3	SNRNP48	PTPN6	BCL2L11	ENTPD7	TMCO1	ANGEL2	MOCS2	MBNL3	PPM1D	TUBA4A	FAM49B	EXD2	INPP5B	SMC3	OCRL	SPAST	MGEA5	CDYL	NCF1	PPP2R5A	SPATA6	RECQL	PANX1	ALAS1	TMEM159	IPO11	KCTD18	OGT	FAS	HMGN5	TMEM109	HSD17B4	IFNAR1	TMEM41A	BRD7	ZNF277	SCAF11	TLK1
GSE29164_UNTREATED_VS_CD8_TCELL_AND_IL12_TREATED_MELANOMA_DAY7_DN	http://www.broadinstitute.org/gsea/msigdb/cards/GSE29164_UNTREATED_VS_CD8_TCELL_AND_IL12_TREATED_MELANOMA_DAY7_DN	Sig395	IL21R	PTRH2	ELAC2	LINC00116	GPANK1	SGCE	JUNB	SALL3	RBPMS2	ARMCX2	PPP3CC	RPL22L1	STAP2	TRIT1	GSX1	CHST15	SNN	VPS37B	C17orf81	COX6C	AP1B1	PCP4	SERINC4	HM13	C14orf180	PDLIM2	AKT1	HRASLS5	MARCKSL1	C1orf54	PFN1	C20orf54	C1orf187	PDCD4	GTF2F2	MYC	ABCB1	APOL2	RABL5	FGD6	CAPSL	HSPBP1	CHURC1	PIGU	TES	RAB11FIP4	MPP2
GSE29164_CD8_TCELL_VS_CD8_TCELL_AND_IL12_TREATED_MELANOMA_DAY7_UP	http://www.broadinstitute.org/gsea/msigdb/cards/GSE29164_CD8_TCELL_VS_CD8_TCELL_AND_IL12_TREATED_MELANOMA_DAY7_UP	Sig396	HIST1H3D	ANXA11	TMEM69	ZBTB5	TNRC6B	ZNF526	PAN2	RERE	ARMCX4	CX3CR1	CTPS2	GPR160	PIAS3	BRAF	HIP1	KIF3B	UNKL	DCAF17	IKBKE	CD300LG	MYO7A	EVI5	SLC2A9	TCEANC2	PDE8A	ZNF192	C9orf5	RNF111	SREK1	MRPL33	PLEKHG1	GPATCH1	SLC25A30	ZSCAN12	RASA1	SORL1	EMP3	ATP10D	KIAA1429	RBM41	UBE3A	CDK17	NEK9	ATXN7L3B	LATS2	FAM175B	MRPL3
GSE29164_CD8_TCELL_VS_CD8_TCELL_AND_IL12_TREATED_MELANOMA_DAY7_DN	http://www.broadinstitute.org/gsea/msigdb/cards/GSE29164_CD8_TCELL_VS_CD8_TCELL_AND_IL12_TREATED_MELANOMA_DAY7_DN	Sig397	TYMS	MOXD1	CYTIP	COPB2	ARMC2	RRM2	PRDX4	HESX1	FNDC3B	GREB1L	LINC00486	GAB1	NME1	C20orf46	KRTAP19-1	MRPL10	PDIA5	C3orf55	STT3B	ZNF35	QRFPR	IGJ	SPRR1A	GGT1	PDIA4	KCNJ16	SSR2	CELP	HSP90B1	SLC11A2	C9orf96	FAM98A	RWDD2B	LOC728868	TSHB	ZWINT	CNKSR1	TRAM1	RGSL1	C19orf10	KRTAP9-4	CD38	C16orf46	SLC37A3	MYBL2	HIST1H3H	KIAA0101
GSE29164_CD8_TCELL_VS_CD8_TCELL_AND_IL12_TREATED_MELANOMA_DAY3_DN	http://www.broadinstitute.org/gsea/msigdb/cards/GSE29164_CD8_TCELL_VS_CD8_TCELL_AND_IL12_TREATED_MELANOMA_DAY3_DN	Sig398	CRTAM	TLE1	EIF4ENIF1	DHCR24	COX8A	RPL22	GNB4	KRT25	TUBA1A	TMC6	CD99L2	SETD4	DGKA	KLF7	TTC39B	SOCS3	KLF2	DNTT	PRKD2	CCR7	SRPK1	ITGA6	RGS14	PAFAH2	FXYD5	IL6R	ITM2A	SSBP2	MYC	SLC30A4	SHOC2	POLE2	S1PR4	EMP3	ARHGAP21	RASA3	RGS10	ZNF22	BTF3L4	KCNN4	SGK1	MYB	CD5	NPC2	ACTN1	TNFAIP8L1	SERPINI1
GSE29164_UNTREATED_VS_CD8_TCELL_TREATED_MELANOMA_DAY7_UP	http://www.broadinstitute.org/gsea/msigdb/cards/GSE29164_UNTREATED_VS_CD8_TCELL_TREATED_MELANOMA_DAY7_UP	Sig399	MAP3K8	PSME1	RAC2	CCR2	SLC35B1	IGJ	ITM2C	UFC1	MYO6	PIP5K1A	CXCR3	UBXN1	F2R	ALAD	B4GALNT1	SMPD1	CWC15	CCR5	DDHD2	ANXA1	CYBA	DNAJC1	ELL2	IFNG	PSMB8	TNFRSF18	CD82	RNASE4	TIRAP	VCAM1	RIN2	NSMAF	FASLG	ICAM1	SLC35B2	RNPEP	PIH1D1	FLOT1	LYN	MARCKS	IL4I1	SOAT2	KLRK1	PSMB3	IL18RAP	C9orf23	CCL5
GSE23568_ID3_TRANSDUCED_VS_ID3_KO_CD8_TCELL_DN	http://www.broadinstitute.org/gsea/msigdb/cards/GSE23568_ID3_TRANSDUCED_VS_ID3_KO_CD8_TCELL_DN	Sig400	HNRNPA1	BCL2A1	DPF2	MYCBP2	CYFIP1	CD22	TK2	B2M	PTPN13	FAM105A	ITGA6	INPP5A	ZNF187	EIF4G2	HLA-DQA1	IGKC	FASLG	ZBTB20	CD83	ITGB1	ITM2A	CCR6	MS4A6A	CD19	TSPAN32	GLCE	CASP4	PRKCD	SLC25A36	ZFP36L1	CD9	SLC30A5	SPG21	GOSR2	SLC44A1	BLK	TTC39B	CTSH	IDUA	NRP1	RCAN3	AKAP12	SAFB	RPL30	PPID	TNFRSF4	CA2
GSE23568_CTRL_VS_ID3_TRANSDUCED_CD8_TCELL_DN	http://www.broadinstitute.org/gsea/msigdb/cards/GSE23568_CTRL_VS_ID3_TRANSDUCED_CD8_TCELL_DN	Sig401	MCART6	PSMB6	NUDT1	S100A10	ANLN	STMN1	CDK1	AHCY	MRPL27	THOC4	USMG5	CCNB2	CD8B	CDC20	PARM1	TOP2A	COL4A1	CHEK1	ELOVL6	NCAPH	PSPH	SLC31A1	TBC1D24	CCDC164	CDT1	KIAA0101	CKS1B	BRCA1	EXO1	SOD2	NUSAP1	E2F8	RACGAP1	ANAPC13	RAD51	ATPIF1	CCDC28B	SET	POLR3K	BIRC5	CCR9	CBX5	CD8A	SNHG6	NDUFA2	C16orf5	CDCA8
GSE23568_CTRL_VS_ID3_TRANSDUCED_CD8_TCELL_UP	http://www.broadinstitute.org/gsea/msigdb/cards/GSE23568_CTRL_VS_ID3_TRANSDUCED_CD8_TCELL_UP	Sig402	POU2F1	CD19	SNX2	CIC	IGKC	ITGB7	ANGPTL2	IL6R	IRF3	HBA2	CASP4	ITM2C	CD6	SLC4A7	S1PR4	DPF2	RGS14	FEM1A	LGMN	TNFRSF4	TMC6	SIT1	SPNS1	TSPAN32	GRK6	TERF2IP	CANT1	LDB1	ANKS3	SETD4	CD2	ABCF3	ZNF467	ARRB1	APBB1IP	ARFGAP2	CLCN4	VKORC1	TOX4	TTC17	ITGA6	TOR1B	SIPA1	TK2	CCR7	SELL	PPP2R5A
GSE23568_ID3_KO_VS_WT_CD8_TCELL_UP	http://www.broadinstitute.org/gsea/msigdb/cards/GSE23568_ID3_KO_VS_WT_CD8_TCELL_UP	Sig403	NCAPH	UCK2	SLC31A1	TOP2A	YARS	PSMB6	CCL5	SSX2IP	S100A10	NEK2	ASPM	TBC1D24	USMG5	SF3B14	CA2	SNHG6	TFDP1	CD8A	CD244	CCDC164	PLP2	MCOLN2	MKI67	FGL2	TSC22D1	ARPC3	GABARAPL1	BLM	CHEK2	CD7	ANLN	ELOVL6	CCR9	ROM1	MRPL51	LMNB1	TTK	KIAA0101	ITGAE	ASF1B	DCPS	ANAPC13	ATPIF1	ST3GAL4	CBX5	RPL36A	SHFM1
GSE23568_ID3_TRANSDUCED_VS_ID3_KO_CD8_TCELL_UP	http://www.broadinstitute.org/gsea/msigdb/cards/GSE23568_ID3_TRANSDUCED_VS_ID3_KO_CD8_TCELL_UP	Sig404	DAG1	ANXA2	MS4A6A	ANGPTL2	ITGB7	PPP4C	ZNRF1	UCK2	CTSD	KCNN4	RGS10	FAM101B	ABHD8	TRAF1	PJA1	NBEAL2	FYN	COQ9	CDK2AP2	ACTN1	NOTCH1	PRKCSH	FAM189B	CD9	EYA2	CD96	SETD4	SPNS1	ITM2C	ID2	DDHD2	CBX6	NPC2	CTSW	DOCK5	IL18R1	FASLG	LBP	FAM105A	SELPLG	THOC4	VPS37B	CD247	ITM2A	TNFRSF4	SFMBT2	PTPN13
GSE23568_ID3_KO_VS_WT_CD8_TCELL_DN	http://www.broadinstitute.org/gsea/msigdb/cards/GSE23568_ID3_KO_VS_WT_CD8_TCELL_DN	Sig405	GGA2	CHEK2	RHOQ	SIPA1	FCGR2B	MYO1E	C9orf85	PKIB	LYN	ELL2	TRAPPC5	CEP89	NECAP2	POU2AF1	FUCA1	PSPC1	MCOLN2	MCART6	SNX2	PPP3CC	ZNF282	SERPINB1	CSK	INPP5A	IRF4	PPP3CA	LIMD1	MARCKS	TCF4	TMOD3	ARHGAP21	NUCB2	CD22	APOE	ZC3H12C	CIITA	CD37	PRSS23	PRKCD	ABCA1	CMTM7	GM2A	CNR2	NAPB	ERO1LB	CD19	SMARCD2
GSE23568_CTRL_TRANSDUCED_VS_WT_CD8_TCELL_DN	http://www.broadinstitute.org/gsea/msigdb/cards/GSE23568_CTRL_TRANSDUCED_VS_WT_CD8_TCELL_DN	Sig406	EIF2B5	EIF2B4	LAPTM5	NBEAL2	PTPN13	KLF7	PITPNM1	PBX2	ACTN2	FXYD5	RGS10	SPNS1	ITM2C	SIPA1	SUDS3	LCK	CSK	ITGB7	CD3E	MIDN	ISG15	TRAF1	GADD45A	CD27	BANP	TCF7	PHF23	NDST2	KCNAB2	NAB2	FAM101B	MYO1F	SATB1	HBA2	NDRG2	CCR7	ABHD8	SLC29A1	SGK1	SLC25A25	F8A1	GALNT2	TAP1	LPIN1	ISYNA1	TNFRSF4	KRT25
GSE23568_CTRL_TRANSDUCED_VS_WT_CD8_TCELL_UP	http://www.broadinstitute.org/gsea/msigdb/cards/GSE23568_CTRL_TRANSDUCED_VS_WT_CD8_TCELL_UP	Sig407	TEP1	GGA2	IL10RA	PTP4A3	MYADM	LIMD1	INPP5A	S100A11	P2RX4	CPSF2	TOR3A	TUBB6	ADAM9	PRKCE	RHOQ	IL15	EPS8	ANXA2	TIPARP	PEPD	ELL2	GPR137B	BLK	LYN	CTSH	SAA1	SLC25A15	SLC7A7	PSPC1	MCART6	LY6D	FGL2	RNH1	CEP89	S100A6	RBM26	CD40	PRKCD	LITAF	VCL	RYR1	SYK	NDST1	SNX2	ORC6	PPP3CA	TPST1
GSE33374_CD8_ALPHAALPHA_VS_ALPHABETA_CD161_HIGH_TCELL_DN	http://www.broadinstitute.org/gsea/msigdb/cards/GSE33374_CD8_ALPHAALPHA_VS_ALPHABETA_CD161_HIGH_TCELL_DN	Sig408	PTPLAD1	FRMD6	IFIH1	PSMB8	MED10	FADS1	VCAM1	FAS	PMM2	LAPTM5	FAM101B	CNGA1	NDN	RNASE4	SLC38A10	STARD3	GBA	SMPDL3A	DNAJC1	ATP6V1E1	IQGAP2	EIF2B4	TNK2	BOP1	CHCHD7	CSTF2T	HM13	E4F1	CD27	ACTN2	CTSD	PEX5	SDHAF1	RPS6KA4	BZW2	CD82	DUSP11	PRKACB	B4GALNT1	CORO1B	DAP	ABCF1	IL18RAP	SFMBT2	PSME1	GPC1	CAD
GSE33424_CD161_HIGH_VS_INT_CD8_TCELL_UP	http://www.broadinstitute.org/gsea/msigdb/cards/GSE33424_CD161_HIGH_VS_INT_CD8_TCELL_UP	Sig409	SERPINI1	OAT	LIPC	KIAA0930	MTCH1	CTSH	P2RX4	PPP1R21	HSD17B11	CLDN7	ADAM9	LGALS4	PLBD1	RALGPS2	URM1	XPOT	PIM1	TPST1	VCL	PKIG	EPS8	PRKCD	IGHM	KLF2	C4orf34	OXT	BCAP29	SLC25A15	MYADM	ITGA4	GCM2	PRKCE	HSDL2	TEP1	PSPC1	EIF2AK4	HOMER1	LAMP2	RASA3	CCT6A	KCNN4	MPEG1	RABGGTB	KIAA1522	GCSH	ZC3H12C	SLC16A7
GSE33374_CD8_ALPHAALPHA_VS_ALPHABETA_CD161_HIGH_TCELL_UP	http://www.broadinstitute.org/gsea/msigdb/cards/GSE33374_CD8_ALPHAALPHA_VS_ALPHABETA_CD161_HIGH_TCELL_UP	Sig410	DARC	H2AFJ	CD8B	IMMT	CIT	HCN3	CELSR1	ARL4C	SF3A2	PIK3C2A	NR1H2	ACTN2	DAGLB	SNCA	LYST	CD8A	XRCC1	NEURL4	LMO2	KCNB1	ST6GALNAC1	PLBD1	SIT1	KRT7	COL18A1	TRPC4	CNTNAP1	GNAQ	FOXN3	EXOSC8	PITX1	SEMA5B	ANGPT2	DEGS2	CD79A	MED27	AKAP1	SOCS3	VCAN	CIC	TFPT	CCL19	CKM	SETD4	EXO1	ALOX15	RGS11
GSE33425_CD161_INT_VS_NEG_CD8_TCELL_UP	http://www.broadinstitute.org/gsea/msigdb/cards/GSE33425_CD161_INT_VS_NEG_CD8_TCELL_UP	Sig411	RAB24	GNG10	AHNAK	MDFIC	CD9	RNF11	CA2	CYTH3	HNRNPK	ASAH1	RAB10	SKAP2	UBE2D3	SRGN	EEA1	UBL3	ARL5A	ANXA2	ATP6V1C1	TNFRSF18	SPAST	CD244	CIAPIN1	RNFT1	PPID	UBA3	TRIM59	EPB41L2	CMAS	CD82	BCAP31	DUSP16	YWHAH	EID1	RSU1	SAFB	MCEE	CRLF3	HIAT1	PLSCR1	FASLG	DEGS1	GLT25D1	SMU1	KCTD12	CBX5	PCBP1
GSE33424_CD161_HIGH_VS_INT_CD8_TCELL_DN	http://www.broadinstitute.org/gsea/msigdb/cards/GSE33424_CD161_HIGH_VS_INT_CD8_TCELL_DN	Sig412	ARAP3	TUBA1B	HIST3H3	PPA1	CBR1	SRCIN1	PTPN13	G0S2	SSBP2	USMG5	SUPT4H1	AQP9	RACGAP1	C8orf33	CCDC94	MCM2	CBX6	NCKAP1	NUDT1	NOTCH1	CTLA4	PSPH	SLC25A10	ITM2A	PALM	GFI1	RGS10	AHCY	UQCRQ	ELOVL6	FAM105A	USP3	PKP4	SH3PXD2A	SPR	VPS26B	HMP19	CDC20	SEMA4F	S100A4	PDLIM1	ACTN2	KIF22	STAT5B	ADA	COL4A1	KIAA0101
GSE33424_CD161_HIGH_VS_NEG_CD8_TCELL_UP	http://www.broadinstitute.org/gsea/msigdb/cards/GSE33424_CD161_HIGH_VS_NEG_CD8_TCELL_UP	Sig413	SKIL	TMEM229B	INPP1	RHOQ	RAB24	STARD10	PKIG	FAM49B	VAMP4	TK2	MYO1E	CIITA	HLA-DOB	GNG10	ARL5A	ZDHHC14	MIF4GD	BCL2A1	CD40	IST1	CYFIP1	MCART6	CYP4A11	PRKCD	MCL1	CD74	ZNF385A	UIMC1	SNX2	PLEKHB2	LYL1	CYP2B6	SPIB	PCSK5	MDFIC	SMNDC1	GOSR2	EPB41L2	SRGN	PLCG2	FIGNL1	GGA2	POU2AF1	SYK	NAPSA	GCNT1	SNX9
GSE33424_CD161_HIGH_VS_NEG_CD8_TCELL_DN	http://www.broadinstitute.org/gsea/msigdb/cards/GSE33424_CD161_HIGH_VS_NEG_CD8_TCELL_DN	Sig414	STMN1	DARC	ACTN2	CBR1	MCM2	G0S2	FAM101B	LAPTM5	NUDT1	FAM53A	C8orf33	NCBP1	CKAP2	LCK	PSMB6	PTPN13	AIRE	MRPL54	CDK1	SIT1	THOC4	RANBP1	CDCA3	USP3	SRCIN1	SGK1	MS4A6A	RGS10	ATP5J	NPTX1	MRPL27	HMP19	TCF7	CIT	CCDC94	MPHOSPH9	UCP1	ZBTB7B	CCNA2	SH3PXD2A	KIAA0101	CD28	IL7R	FGF13	FAS	COL1A2	CHCHD7
GSE33425_CD161_INT_VS_NEG_CD8_TCELL_DN	http://www.broadinstitute.org/gsea/msigdb/cards/GSE33425_CD161_INT_VS_NEG_CD8_TCELL_DN	Sig415	ARRB1	RAB24	FICD	CD40	FAM49B	CYFIP1	PKIG	SNX10	PSAP	RHOQ	PRKCD	RPN1	MDFIC	KLF4	VAMP4	TEP1	HLA-DOB	ENTPD1	SAFB	RALGPS2	SLC7A7	INPP5A	MYO5A	RAB10	UPF3B	MYADM	ZNF187	IREB2	PLAC8	CD74	CTSC	CHD1	CLTC	EPB41L2	UIMC1	ASNSD1	LIMD1	PCSK5	BLK	PLEKHB2	GOSR2	SNX2	AP1G1	ING4	UBE2D3	SYK	FAM91A1
GSE33425_CD161_HIGH_VS_INT_CD8_TCELL_DN	http://www.broadinstitute.org/gsea/msigdb/cards/GSE33425_CD161_HIGH_VS_INT_CD8_TCELL_DN	Sig416	IDI1	DHRS4	CTLA4	PPIC	ABCG2	ST3GAL4	EZH2	RACGAP1	TKT	PFKP	ATPIF1	XDH	NCAPH	IMPA2	ID2	UCK2	CTSD	RBM17	NDUFA13	SELPLG	CD9	RNF149	TTK	CAPN3	GALK1	LCK	LMNB1	AGFG1	SMO	PDCD4	CCDC94	BRIX1	TSPO	PGK1	RGS10	TNFRSF9	PELI1	NDUFA9	GFI1	CYTH3	ZSCAN12	HAUS3	NEK2	DNAJB6	ITM2C	AP3S1	AMZ2
GSE33425_CD8_ALPHAALPHA_VS_ALPHABETA_CD161_HIGH_TCELL_UP	http://www.broadinstitute.org/gsea/msigdb/cards/GSE33425_CD8_ALPHAALPHA_VS_ALPHABETA_CD161_HIGH_TCELL_UP	Sig417	ZNF398	OAT	SIPA1	CTSS	SYK	ZNF385A	MIF4GD	B4GALT3	APOE	HEXA	RUFY1	CBFA2T2	ARFGAP2	POU2F1	LYN	C9orf85	KTN1	PHTF2	PITPNA	ASH1L	TSPAN32	RBM4B	CD74	NRAP	SNX2	NUCB2	SELL	RHOQ	TXNDC16	ELL2	NR4A3	GGA2	GSTM3	NEURL4	SPI1	EIF4EBP2	HLA-DOB	PMPCA	MYADM	FCGR2B	FAM101B	CD19	POU2AF1	CD79B	BIN1	NAGLU	PRKCD
GSE33425_CD8_ALPHAALPHA_VS_ALPHABETA_CD161_HIGH_TCELL_DN	http://www.broadinstitute.org/gsea/msigdb/cards/GSE33425_CD8_ALPHAALPHA_VS_ALPHABETA_CD161_HIGH_TCELL_DN	Sig418	FADS1	LCP2	ITM2C	CAPN3	DLX3	STK39	POLD2	ACTN2	IMPA2	PFKP	PRKACB	PSMB9	CNDP2	XDH	CDC42SE1	TCF7	CD28	PSMB6	RANBP1	LCP1	CCL5	GALNT2	ITPKB	ELAVL1	WRN	THY1	PKP4	RGS10	TMEM38B	EZH2	BLM	FRAT1	SGK1	LCK	LAPTM5	SURF4	MRPL41	CCDC164	CD27	GCLM	CTSD	ANLN	FRAT2	CKS2	GSN	FAM192A	PELI1
GSE33425_CD161_HIGH_VS_INT_CD8_TCELL_UP	http://www.broadinstitute.org/gsea/msigdb/cards/GSE33425_CD161_HIGH_VS_INT_CD8_TCELL_UP	Sig419	BCL7B	POU2F1	TUBB6	OAT	MYADM	SNX5	ADAM9	VPRBP	SND1	NR4A3	SYK	CD79B	ENTPD1	RALGPS2	KLF4	RUFY1	CLTC	LYN	PPID	TUBB2A	CD19	SLC25A15	C9orf3	PDE8A	CD74	BLZF1	RHOQ	IGHM	SCOC	EIF2AK4	CNN3	MCOLN2	SNX2	RNGTT	ELL2	TXNDC16	PPP1R21	ZNF385A	FICD	GGA2	RYR1	PBX3	EPS15	SLC7A7	VCL	GNS	CBFA2T2
GSE33425_CD161_HIGH_VS_NEG_CD8_TCELL_UP	http://www.broadinstitute.org/gsea/msigdb/cards/GSE33425_CD161_HIGH_VS_NEG_CD8_TCELL_UP	Sig420	ATG16L1	AURKA	SATB1	TNFRSF21	SFT2D1	TNFAIP8L1	CSAD	PCID2	PI4K2A	IFIT3	LGALS9B	NUP50	USP38	NR4A2	CUX2	FUBP1	GSN	NXPH1	UHRF1	ARHGAP39	PTPN6	SIX4	HIRA	CTR9	WDHD1	ADA	HAUS5	HLA-DQA1	TAX1BP1	CGGBP1	CPSF7	TAF8	RAD52	CENPB	DPP3	SLC9B2	GABBR1	HTR1B	RAB21	GAD1	PAN2	ANKRD2	BTG1	PARP8	POLA1	HSD11B1	SKIL
GSE33425_CD161_HIGH_VS_NEG_CD8_TCELL_DN	http://www.broadinstitute.org/gsea/msigdb/cards/GSE33425_CD161_HIGH_VS_NEG_CD8_TCELL_DN	Sig421	ITM2B	RNF208	IRAK1	THUMPD1	LITAF	PIM1	PDCD4	CEP89	VBP1	SCAMP1	GCSH	KLHL7	DLAT	ASS1	S100A4	SPINK4	MGST1	PLAC8	NEK2	KIF16B	NID1	HCK	CD80	MPEG1	DDIT4	EPCAM	CYP11A1	GPHN	SSPN	NAP1L1	BAG1	PDK3	GLRX	TMEM167A	SAR1B	SOCS2	IFI30	BACH1	PEPD	TMEM123	CTSE	CDK5RAP3	UBE3A	TMEM176B	GNL2	EMB	RBBP7
GSE33424_CD161_INT_VS_NEG_CD8_TCELL_DN	http://www.broadinstitute.org/gsea/msigdb/cards/GSE33424_CD161_INT_VS_NEG_CD8_TCELL_DN	Sig422	PHC1	GPR155	WDR90	CMAS	UFC1	TSC22D1	MPRIP	C11orf83	C7orf41	MMP11	KLHL14	TTL	AGL	ABCA3	RAP2A	WDFY2	UPB1	OAZ2	UBASH3B	DONSON	CDC42BPG	CNPY4	CD209	E2F2	RASSF4	LRRC8C	CYP27A1	ZNF862	CDC25B	SORD	CNTD1	RDH12	C22orf13	TUBA1A	TPRG1L	UNC5CL	RPL9	NEDD4	LGALSL	DDB2	PRMT2	CRYBG3	C6orf145	FAHD2A	PFN2	SYT4	ENTPD4
GSE33424_CD161_INT_VS_NEG_CD8_TCELL_UP	http://www.broadinstitute.org/gsea/msigdb/cards/GSE33424_CD161_INT_VS_NEG_CD8_TCELL_UP	Sig423	NAMPT	IRF1	MCOLN3	MX2	NLRC5	SETDB2	CXCL10	ZUFSP	OAS2	MPEG1	EHD3	HSH2D	MITD1	BAZ1A	PABPC1	SGCB	TRIM5	PARP9	DDX58	SIDT1	RNF213	ZNF365	DTX3L	EPSTI1	USP18	TLR3	DLL1	STAT1	RILPL1	TDRD7	TRIM21	NT5C3	SLFN5	DDX60	GBP6	IFITM3	TMEM140	ASNS	IRF9	TOR1AIP2	ZCCHC18	43529	PPA1	IFIT1	PLAC8	DNAJC13	CCND2
GSE26890_CXCR1_NEG_VS_POS_EFFECTOR_CD8_TCELL_DN	http://www.broadinstitute.org/gsea/msigdb/cards/GSE26890_CXCR1_NEG_VS_POS_EFFECTOR_CD8_TCELL_DN	Sig424	LTA	SERAC1	CDC25B	GGA3	WDFY2	CDC42BPG	KRT222	HNRNPUL2	LMAN2L	HABP4	RND3	DDX19B	KLHDC9	KIAA0146	RGS19	SETD1B	ZNF25	DUSP4	NUCB2	DDB2	RALGDS	ATP6AP1	RHOA	CASC4	LGALSL	AHI1	DNTT	CAMTA1	IDH2	ACCS	TK1	ALOX5AP	MPRIP	ITGB7	C8orf58	AMPD3	CISD3	SEMA4B	SLC2A3	PHC1	XBP1	DCTN6	STAP1	DNAJC9	FAM116B	RASSF4	TMEM173
GSE26890_CXCR1_NEG_VS_POS_EFFECTOR_CD8_TCELL_UP	http://www.broadinstitute.org/gsea/msigdb/cards/GSE26890_CXCR1_NEG_VS_POS_EFFECTOR_CD8_TCELL_UP	Sig425	SGCB	UBXN2B	NAMPT	RILPL1	IFITM3	GYPC	CAPRIN1	MED12L	HEG1	MITD1	LRRC16A	GBP2	HLA-E	SHISA5	CYBB	FAP	WLS	MX2	CNOT6L	CXCL10	TMEM206	G3BP2	STARD4	CNOT3	TLR7	INPP4B	HAP1	RNPS1	TRIM21	SPATA13	LSS	EVI2A	RNF213	PMEPA1	FBXO34	ZNF277	SERPINB9	MRPL22	ABTB2	C19orf2	FAM178A	BCL2A1	C9orf93	SLFN12	ISG20	PLAC8	TNFSF10
GSE32128_INOS_DEPENDENT_VS_INOS_INDEPENDENT_ACTIVATED_TCELL_DN	http://www.broadinstitute.org/gsea/msigdb/cards/GSE32128_INOS_DEPENDENT_VS_INOS_INDEPENDENT_ACTIVATED_TCELL_DN	Sig426	ANXA3	MFN2	RALB	TMEM140	HAUS8	ZFHX4	LPGAT1	ANKIB1	LPCAT1	TBC1D20	POLR3C	NCKAP1L	RAB11B	FGF21	CCNB1IP1	C6orf115	MYF6	CXorf56	TUBB4B	SERHL2	DPP3	IRF9	CMPK1	GJA4	MAB21L1	CCNG1	PDPK1	FBXO21	RPS9	SLC20A1	CHD8	HCST	CREB3L4	SUMF1	F2R	EML6	SCN3A	MYLIP	TMEM123	MBTPS1	CCDC71	ERAP1	CPSF7	ATP4B	SLC41A1	CP	RUFY3
GSE32128_INOS_DEPENDENT_VS_INOS_INDEPENDENT_ACTIVATED_TCELL_UP	http://www.broadinstitute.org/gsea/msigdb/cards/GSE32128_INOS_DEPENDENT_VS_INOS_INDEPENDENT_ACTIVATED_TCELL_UP	Sig427	MAPRE2	ENPP3	GSTM3	GABRA2	FAM131B	PKIG	TBC1D23	RALGPS2	TTC1	ARIH2	SRP14	SSFA2	HDAC7	SRCAP	PCTP	SERTAD3	HRH1	MAPK6	C9orf91	BAP1	SERPINB2	HLA-B	ARL8B	DUSP11	HYOU1	HAVCR1	RNF19A	GPRASP1	BUD13	PPP3CB	HSPA1B	CYP2S1	FZD1	BCAT2	COL1A1	GAA	CIAPIN1	PRKACA	HOXB13	CKAP5	EPHA5	ARID1A	STAM2	PI4K2A	GPCPD1	SLC11A2	UBE2N
GSE34392_ST2_KO_VS_WT_DAY8_LCMV_EFFECTOR_CD8_TCELL_UP	http://www.broadinstitute.org/gsea/msigdb/cards/GSE34392_ST2_KO_VS_WT_DAY8_LCMV_EFFECTOR_CD8_TCELL_UP	Sig428	PDCD4	MPPE1	ANGPTL4	OPLAH	ZNF414	FOXO3	AAGAB	DDX26B	SNX27	CTDSP2	POLD1	FRG1	EHD4	ANKRD44	HPCAL1	ITSN1	NEURL2	RASL11B	LPIN1	PPARG	TXNDC16	PAOX	SLC26A11	RPA3	L1CAM	SRPK2	CNOT8	PDPK1	ZNF707	PRPS2	EEF2K	ESYT1	ARHGAP6	RASA3	MAN2A2	RCBTB2	PIKFYVE	LPXN	TXNIP	TPCN1	GPR160	HJURP	PPT1	DUSP22	NDUFA6	THBD	ZCCHC11
GSE34392_ST2_KO_VS_WT_DAY8_LCMV_EFFECTOR_CD8_TCELL_DN	http://www.broadinstitute.org/gsea/msigdb/cards/GSE34392_ST2_KO_VS_WT_DAY8_LCMV_EFFECTOR_CD8_TCELL_DN	Sig429	GEM	RHOB	RIPK2	FAS	LAD1	CLEC6A	RELB	ACSL1	EDN1	TNFSF9	IGSF9	UBE2F	DUSP5	NR4A3	WDR1	SEMA6D	CFLAR	TTC39B	PPP1R3B	PCYT1A	PDGFA	EGR2	MET	LPAR3	ARMCX3	IL4I1	TMEM26	PSTPIP2	NRP2	CCRL2	IL6	ST3GAL1	GPR68	SLC2A1	TLR2	GADD45B	CD70	ADAM17	IL2RG	MED13L	PSMD10	ID2	C3	DYRK2	STX6	CASP4	MTMR14
GSE36888_STAT5_AB_KNOCKIN_VS_WT_TCELL_IL2_TREATED_2H_UP	http://www.broadinstitute.org/gsea/msigdb/cards/GSE36888_STAT5_AB_KNOCKIN_VS_WT_TCELL_IL2_TREATED_2H_UP	Sig430	ACSL6	TREM2	CA11	HPS3	AIG1	SORBS3	HEXA	SNX29	STARD13	ASRGL1	HGF	CAT	CRHBP	RAB42	CFD	APOC1	GPR133	CHST13	IQGAP2	ZCCHC6	C11orf45	CD180	STMN1	TNFRSF11A	TBC1D2	TMEM134	C19orf54	MPPE1	EPS8	ERP29	PSEN2	PPT1	FNDC3A	SRD5A3	SEPP1	ATPIF1	ECI2	DEPTOR	LOC643529	DHRS9	OSBPL1A	PLA2G15	RNASET2	CIITA	CCNY	AVPI1	CLEC3B
GSE36888_UNTREATED_VS_IL2_TREATED_STAT5_AB_KNOCKIN_TCELL_2H_UP	http://www.broadinstitute.org/gsea/msigdb/cards/GSE36888_UNTREATED_VS_IL2_TREATED_STAT5_AB_KNOCKIN_TCELL_2H_UP	Sig431	ACVR1B	HMGN2P46	TMEM45B	CLIC1	LOC440896	FTH1	WNT5A	TUBB	FNDC3B	CYP27B1	LOC644090	MLLT4	TNFAIP6	TMEM138	SOD2	C9orf30	P2RY2	PION	CD274	DNER	LOC344887	ITGB8	BTG3	TRAF3IP2	CXCL5	EDEM2	PLP2	ELOVL7	GPR68	TMEM115	CXCL1	PLEKHA3	STEAP1	ANKRD22	C6orf211	TNIP3	SLC7A11	HIC1	ASAP1	AZIN1	TALDO1	SLC39A8	HCK	FSD1L	LAMB3	AMPD3	CXCL2
GSE36888_UNTREATED_VS_IL2_TREATED_TCELL_17H_UP	http://www.broadinstitute.org/gsea/msigdb/cards/GSE36888_UNTREATED_VS_IL2_TREATED_TCELL_17H_UP	Sig432	CAT	ITGB5	ATP1B1	CLEC2B	CD180	SLC7A8	LGALS3	MDFIC	RAB42	GAS2L3	RHOBTB1	OAS1	PABPC4	ZADH2	CD101	PFDN5	PPT1	ADK	TMEM144	NDUFA4	ECHDC1	REPS2	GPR133	SLC16A5	CCNY	FRMD4B	C11orf45	EPHB2	NANP	SORBS3	RASA1	SPTSSA	HEXA	RPS6KA2	WDR7	TREM2	CD86	FAM78A	LY86	ME1	A2M	TNS1	PLA2G15	STMN1	HLA-DMB	RNASET2	DHRS9
GSE36888_UNTREATED_VS_IL2_TREATED_TCELL_17H_DN	http://www.broadinstitute.org/gsea/msigdb/cards/GSE36888_UNTREATED_VS_IL2_TREATED_TCELL_17H_DN	Sig433	LOC731424	HLX	C9orf30	STK3	AZIN1	NAMPT	MN1	TMEM115	LYN	HMGN2P46	FPR2	ACVR1B	TNFRSF9	SOCS2	PDLIM7	LIMK2	HCK	STX1A	FJX1	TP53INP2	WNT5A	BCL2A1	MFSD2A	TMEM45B	ITGB8	FTH1	DNER	DDIT4	IER5	CYP27B1	LOC644090	TUBB2A	ZBTB17	FNDC3B	BTG3	SGPP2	SOD2	ZC3H12A	HAS1	ACOT9	PI4K2B	ELOVL7	G0S2	CXCR7	P2RY2	FAM49A	PLP2
GSE36888_UNTREATED_VS_IL2_TREATED_TCELL_2H_DN	http://www.broadinstitute.org/gsea/msigdb/cards/GSE36888_UNTREATED_VS_IL2_TREATED_TCELL_2H_DN	Sig434	FABP4	LHFPL2	ME1	ACADM	LSP1	C1orf198	RPS6KA2	FABP5	CD9	ASPH	C10orf25	BLOC1S2	AVPI1	FHL1	C14orf2	A2M	NRP2	SPOCD1	DOCK3	S100A1	TIE1	COL8A2	ME3	COX5B	MDH1	C11orf45	LIPA	DENND4C	GLUD1	HMG20B	IL1R2	CRABP2	MITF	TMEM134	MYOZ1	LGALS9	HSD3B7	BCAR3	GCLC	SEMA3G	SNAPC5	SHB	CD84	RAB40B	SNAI3	HAVCR2	DHRS11
GSE36888_UNTREATED_VS_IL2_TREATED_STAT5_AB_KNOCKIN_TCELL_6H_UP	http://www.broadinstitute.org/gsea/msigdb/cards/GSE36888_UNTREATED_VS_IL2_TREATED_STAT5_AB_KNOCKIN_TCELL_6H_UP	Sig435	TNIP3	SMPDL3A	HAS1	SLC7A7	SOCS3	FSD1L	PCGF3	RYBP	SOD2	SAMSN1	CASP5	EMR3	USP3	NAGS	KIAA1211	EDEM2	VDR	CD14	ZC3H12A	MLLT4	ELL	NEFH	IER3	LHFPL1	DMRT1	FCGR2B	LRRC4	NFKBIZ	MEGF9	LOC648987	PLSCR1	S100A8	FIGNL1	DDIT4	LYN	FPR1	LILRA1	GSTA4	TGFA	EMILIN2	LOC401312	TBC1D30	GK5	FCRLB	ASPHD2	LOC541472	BTBD10
GSE36888_UNTREATED_VS_IL2_TREATED_STAT5_AB_KNOCKIN_TCELL_6H_DN	http://www.broadinstitute.org/gsea/msigdb/cards/GSE36888_UNTREATED_VS_IL2_TREATED_STAT5_AB_KNOCKIN_TCELL_6H_DN	Sig436	ME1	GTF2E1	TREM2	COX5B	MDH1	COX7B	BLOC1S2	PSMA5	NANP	GFM1	CANX	MYOF	E2F6	HSPA9	FABP4	TAF9	SPRY2	CAMK1	HNRNPA3	AGPS	CBR1	RAPH1	LGALS9	C4orf43	FRMD4B	GLUD1	GPC4	CD52	PGM2	SLC50A1	A2M	TMEM48	C1orf109	ALDH3A2	NDUFA4	TMED10	ME3	FAM162A	NDUFS3	MRPL15	NCBP2	FAIM	FABP5	ALG5	AVPI1	METTL1	NRP2
GSE36888_UNTREATED_VS_IL2_TREATED_TCELL_6H_UP	http://www.broadinstitute.org/gsea/msigdb/cards/GSE36888_UNTREATED_VS_IL2_TREATED_TCELL_6H_UP	Sig437	TNIP3	HAS1	ELL	SLC7A7	CASP5	TNFRSF1B	PLAC8	SMPDL3A	MYO1G	C20orf160	SH3PXD2B	SEMA4C	SOCS1	DDIT4	SLC25A37	GK5	SOD2	LIMK2	SOS1	LYN	ITGB8	PLAGL2	ZC3H12A	TRIP10	VNN3	FAM49A	RYBP	EMILIN2	NAGS	BEST1	TOM1	VDR	RAB27A	CISH	MAP3K4	LINC00085	TAOK1	C8orf60	TGFA	PLD1	LOC285957	LOC152024	CCND3	PNPLA6	EMR3	ASPHD2	PLSCR1
GSE36888_UNTREATED_VS_IL2_TREATED_TCELL_6H_DN	http://www.broadinstitute.org/gsea/msigdb/cards/GSE36888_UNTREATED_VS_IL2_TREATED_TCELL_6H_DN	Sig438	CANX	TIMM13	GCLC	ALG5	BLOC1S2	ADK	TNS1	MYOF	NANP	C2CD2	RAB7B	OSBPL1A	FBXO4	CAMK1	LARP4	MYO1E	DPCD	CD1E	ALG2	TREM2	HNRNPA3	UTP18	PACRGL	TREML1	LOC284385	ELOVL6	EEF2K	LGMN	ARMCX5	COMMD10	TAF9	C1orf109	MBNL3	HYLS1	IKBKAP	GRSF1	SEC63	TANC2	PNPO	LIG3	NARS	TSSK4	OTUD4	FN1	LCTL	VSIG4	PDCD6
GSE36888_UNTREATED_VS_IL2_TREATED_STAT5_AB_KNOCKIN_TCELL_17H_UP	http://www.broadinstitute.org/gsea/msigdb/cards/GSE36888_UNTREATED_VS_IL2_TREATED_STAT5_AB_KNOCKIN_TCELL_17H_UP	Sig439	BCL2A1	PTGS2	GK5	C5AR1	LOC283683	SERPINB7	PTGES	LOC285957	TRAF3IP2	HIST1H2BG	CCDC69	METRNL	CYTIP	HLX	C15orf37	LIMK2	AGPAT4-IT1	ANO3	IRS2	HIST1H2AJ	SLC1A2	ELL	MYL6	RUNX1	MAP3K4	CHST15	MYO1G	PLAC8	MTHFS	EMP2	TREM1	ZFPM2	SLC25A37	FJX1	CSRNP1	DUSP4	C19orf59	FLJ34208	ZBTB17	HAS1	CDKN2D	PFKFB3	KIAA2018	NTS	LTB4R	NMNAT2	RUSC1-AS1
GSE36888_UNTREATED_VS_IL2_TREATED_STAT5_AB_KNOCKIN_TCELL_17H_DN	http://www.broadinstitute.org/gsea/msigdb/cards/GSE36888_UNTREATED_VS_IL2_TREATED_STAT5_AB_KNOCKIN_TCELL_17H_DN	Sig440	ITGB7	GSTO1	TNFRSF25	APOBEC2	TAF6	MYO1E	ABLIM3	BTBD1	CORO2B	CDC25B	CANX	SIK1	ROM1	SPOCK2	AGPAT5	TREML2	FLRT2	WDR26	NOVA1	FAM65B	C12orf75	ATOH8	ARRB1	MSH2	IRAK2	DNAJB14	SNX2	NXNL2	MPPED2	RFC5	GNB4	TRAPPC6A	AAGAB	CCT3	SPNS1	PFKP	SHMT2	CCDC6	CLCN6	ISLR	SOX13	EGLN3	GZMM	LARP1	RAMP3	USP15	GZMA
GSE36888_STAT5_AB_KNOCKIN_VS_WT_TCELL_IL2_TREATED_6H_UP	http://www.broadinstitute.org/gsea/msigdb/cards/GSE36888_STAT5_AB_KNOCKIN_VS_WT_TCELL_IL2_TREATED_6H_UP	Sig441	GYG1	ERCC5	SLC28A2	C8orf40	MB21D1	CLCN7	NMRAL1	SLAMF6	SLFN13	IRF7	CCDC164	COMMD4	PFKFB4	HELB	BRCA2	CD3G	SGSH	TRDMT1	SRP54	AQP9	MDP1	BCKDK	ARSB	RPAP2	NR6A1	BEND6	HNRNPD	KHDRBS1	DDX58	MDK	C12orf33	NLRC5	PTPRE	TBCE	GHSR	FAM125B	MED23	IGFLR1	ACYP1	DTNBP1	ACP2	KDM6A	IL21R	CRX	KIAA1467	KCTD2	C17orf75
GSE36888_STAT5_AB_KNOCKIN_VS_WT_TCELL_IL2_TREATED_6H_DN	http://www.broadinstitute.org/gsea/msigdb/cards/GSE36888_STAT5_AB_KNOCKIN_VS_WT_TCELL_IL2_TREATED_6H_DN	Sig442	DCXR	CXorf23	SSBP3	SOAT2	XPR1	ANP32E	PRPF3	NRARP	CCP110	RIPK3	LOC729852	GZMA	IPMK	STYK1	HIST1H2BB	H2AFX	ARL5A	GRINA	PTCH1	INPP4A	EME1	RAP1GDS1	XPNPEP1	MTOR	DGCR8	ADSSL1	HAUS3	IRGQ	KIAA0090	CENPN	SMC5	EPB41L2	ZNF22	LEPREL4	C16orf48	SLBP	MYCN	SLC41A2	SMUG1	SEC23A	SERPINB9	TRIM44	CDC14A	ZDHHC16	ARSB	LRRC57	CD160
GSE36888_STAT5_AB_KNOCKIN_VS_WT_TCELL_IL2_TREATED_17H_UP	http://www.broadinstitute.org/gsea/msigdb/cards/GSE36888_STAT5_AB_KNOCKIN_VS_WT_TCELL_IL2_TREATED_17H_UP	Sig443	SLC15A3	ING5	HSD17B11	TNFRSF25	DUS2L	ERAP1	ABCC1	ZHX2	COMMD6	PON2	BATF	CD2AP	SERPINB1	TBC1D8B	KIAA2013	MOB1A	POU6F1	TAF4B	ALDH3A2	SIT1	KBTBD11	MRPS16	FABP1	CXCR3	43526	RDH12	LYSMD2	SLC35A5	KIF1B	SYNE2	LRP5	PPRC1	MYC	XKR8	VAV3	ECE2	ADPGK	IER3	CHMP1B	DNAJB9	DERL2	RAPGEF6	POLR3E	IFIT1B	AEN	PRMT3	USP45
GSE36888_STAT5_AB_KNOCKIN_VS_WT_TCELL_IL2_TREATED_2H_DN	http://www.broadinstitute.org/gsea/msigdb/cards/GSE36888_STAT5_AB_KNOCKIN_VS_WT_TCELL_IL2_TREATED_2H_DN	Sig444	CATSPER1	PARP8	ZFP64	ATXN1	IL6R	MYCL1	IL17RA	SPG21	SEMA3C	LOC100302650	SEC61B	SNTB1	RAB13	ETHE1	MICAL2	PSRC1	ADAM9	ZNF775	CUTA	LIN7A	LOC100506190	MEGF9	SLC43A1	ANG	TOP3A	ZNF358	CLEC5A	SELL	CC2D2A	CTSH	ALDH2	LATS2	STARD7	SCPEP1	SIRPA	RNASE4	ASB13	SCARB1	STK32B	PLXDC2	AHR	PTPRN2	CANX	TRIM59	ANO10	NLRP12	RUNX2
GSE36888_UNTREATED_VS_IL2_TREATED_TCELL_2H_UP	http://www.broadinstitute.org/gsea/msigdb/cards/GSE36888_UNTREATED_VS_IL2_TREATED_TCELL_2H_UP	Sig445	ABHD3	ARID5B	CTSC	GPR137B	UBASH3B	SP140L	CDYL2	C1orf96	PTP4A3	CCDC88C	FAM110A	DNASE1L1	PDK4	DNAJA4	SLC39A13	ITGA4	SPRED1	ZRSR2	PARP15	TNFRSF8	LPIN1	VPS53	FGD3	IKZF5	PWWP2B	PPP1R16A	LOC284014	MIS18BP1	KPNA4	DEDD2	HES1	NAAA	SESN1	UST	GCH1	GALNT10	HES4	TIAF1	TRAPPC4	SNED1	RHOF	LBH	ANKMY2	INSIG1	XYLT1	PGLYRP2	DAPK1
GSE36888_STAT5_AB_KNOCKIN_VS_WT_TCELL_IL2_TREATED_17H_DN	http://www.broadinstitute.org/gsea/msigdb/cards/GSE36888_STAT5_AB_KNOCKIN_VS_WT_TCELL_IL2_TREATED_17H_DN	Sig446	GCHFR	ING3	LOC145694	SLC48A1	RIOK3	ANO10	TLR8	RXFP2	CHST15	METTL9	FPR2	MICU1	INPP5A	ATP1B3	B3GNT5	PLD1	LDLRAD3	FCN1	KPTN	FYB	CTSD	ANO5	NCOA1	TMEM33	NEK7	USP8	CLTCL1	UXS1	IPO8	SPG21	NLRP3	ZNF226	TMEM91	TBC1D2	ITGAM	TOX2	PDLIM7	ATXN1	ARL15	FCGR2A	IKBKE	SLC43A3	SERPINA1	NHS	PTGS2	ATP6V1G1	FUCA1
GSE36888_UNTREATED_VS_IL2_TREATED_STAT5_AB_KNOCKIN_TCELL_2H_DN	http://www.broadinstitute.org/gsea/msigdb/cards/GSE36888_UNTREATED_VS_IL2_TREATED_STAT5_AB_KNOCKIN_TCELL_2H_DN	Sig447	ASAH2B	LOC100129726	FCN3	RBM28	GINS1	IGKV3-20	CAND1	IL18RAP	FAIM3	NARS2	HIST1H2BL	ZNF789	DNAJA4	NDUFAF4	GRIP1	AXL	ARL4C	RPS11	ARHGAP15	OVGP1	RALA	IL7R	ADA	AK3	GRAMD3	ZNF251	C19orf33	DENND1B	MRC2	PLA2G12A	ACER3	BCL7A	PPM1J	PPP1R16A	CD160	UST	HIST3H2A	PABPC1L	LBH	SP140	CDCA7L	HLA-DPB2	SIGLECP3	CENPK	TCF3	RAN	SNHG12
GSE34217_MIR17_92_OVEREXPRESS_VS_WT_ACT_CD8_TCELL_DN	http://www.broadinstitute.org/gsea/msigdb/cards/GSE34217_MIR17_92_OVEREXPRESS_VS_WT_ACT_CD8_TCELL_DN	Sig448	ADORA2B	TLCD1	CAMSAP1	PGRMC2	GOLGA2	PDXK	TOP1MT	PVRL2	HDC	ZFP30	RPF2	LYRM1	LMO3	WSB2	ST3GAL5	SH3TC1	NOL10	MX1	SDHC	WDR4	PGM1	CWH43	ADARB1	PPAN	CYB5RL	FGF11	AACS	MAS1	CCDC112	SATL1	TH1L	TUBD1	HOXD13	RRAGA	LSM5	LOX	FAM113A	ZFPL1	FUK	TADA2A	SNX27	CCDC150	KCNJ2	KIR3DL1	TRIP6	MS4A3	SEMA4C
GSE34217_MIR17_92_OVEREXPRESS_VS_WT_ACT_CD8_TCELL_UP	http://www.broadinstitute.org/gsea/msigdb/cards/GSE34217_MIR17_92_OVEREXPRESS_VS_WT_ACT_CD8_TCELL_UP	Sig449	PLCXD2	PTGER2	ARL4D	RAB27B	SLC27A2	TXNIP	UBE2L3	ADAM2	FMN1	EPO	TYW3	KLF4	MAST1	HEYL	PRR15	JDP2	SYT10	BTNL2	INHBA	NINL	MYC	HLCS	ACAA2	SERPINA9	PROZ	CASP8	FAIM2	LCT	INPP5K	LRRC19	FOLH1	DPPA3	LDB1	SMAGP	ETS1	PTPRC	SHC4	DUSP23	SLC4A1	ELL	PREB	TCTN3	KCNMA1	PROP1	CARD11	CTAG2	FAM71F2
GSE39152_SPLEEN_CD103_NEG_VS_BRAIN_CD103_POS_MEMORY_CD8_TCELL_DN	http://www.broadinstitute.org/gsea/msigdb/cards/GSE39152_SPLEEN_CD103_NEG_VS_BRAIN_CD103_POS_MEMORY_CD8_TCELL_DN	Sig450	ARHGAP39	ERLIN1	TAC3	TCIRG1	RNF6	SEZ6	KCNA5	COX6A2	SLC6A12	CD28	PIK3C2G	BMP7	FEZ1	PAQR7	SSTR5	ZSCAN2	PEF1	USF1	CORO2B	DARC	KARS	SFTPB	SLC50A1	PHEX	CACNA2D1	CRYGC	RXRA	PLD3	APOC4	PLA2G5	AAMP	YPEL3	MAP1LC3A	PEG3	ATXN1	RELL1	KRT15	ZNF467	MKL1	MCEE	COL1A1	IAPP	ZNF394	THAP4	TYRO3	C3AR1	RGS6
GSE39152_BRAIN_VS_SPLEEN_CD103_NEG_MEMORY_CD8_TCELL_DN	http://www.broadinstitute.org/gsea/msigdb/cards/GSE39152_BRAIN_VS_SPLEEN_CD103_NEG_MEMORY_CD8_TCELL_DN	Sig451	BAG3	IRG1	VRK1	WDR92	GADD45G	HIVEP2	ST3GAL4	ZFP64	C9orf46	PSMA7	43529	ADPRHL2	EN1	NSMCE1	CDKN2D	FCGR2B	FYN	MAFB	BMP2K	STAT1	GAB1	PTPN2	SLC12A4	CASP4	PLSCR1	RNF34	BRIX1	TBCA	EXT1	MRPL21	MT2A	BYSL	DUSP1	STX12	SLC12A7	AMBP	RBMS1	RARS	ZNF281	HOXA1	CSF2RB	NOC4L	TIAM1	ORMDL2	PLA2G4A	ATP1A1	FAS
GSE39152_CD103_NEG_VS_POS_MEMORY_CD8_TCELL_UP	http://www.broadinstitute.org/gsea/msigdb/cards/GSE39152_CD103_NEG_VS_POS_MEMORY_CD8_TCELL_UP	Sig452	EPHX1	BPHL	RASA3	PSTPIP2	RELL1	RYR3	HOXB9	BTG2	SLC6A12	IFIT3	ZFPM1	SEMA4D	TEX2	ANKH	ALDH7A1	CYB5A	ATAD3A	MOS	SLC50A1	ANKRD13A	DENND4C	RECK	PSMC4	KIT	CNR2	SFTPB	RPS14	ZNHIT3	DHRS3	ALDH9A1	LRRC8A	ZFAND2A	RAMP1	PHEX	MAN2B1	RBM17	FAM83F	GPX3	CTGF	SYT5	BCKDHA	ADRB2	PON2	RASA4	CACNA2D3	LSP1	RPL32
GSE39152_CD103_NEG_VS_POS_MEMORY_CD8_TCELL_DN	http://www.broadinstitute.org/gsea/msigdb/cards/GSE39152_CD103_NEG_VS_POS_MEMORY_CD8_TCELL_DN	Sig453	G3BP2	KPNA1	NSMCE1	BAG3	CLPTM1L	FBXW11	GPD2	PPP2R1A	PRX	GNPTAB	TXNRD1	GSPT1	MZT2B	RAB3IL1	EIF1AY	SYNGR2	FABP5	TM4SF1	FXC1	SLC2A1	MT2A	PTPN1	ACSL1	ARNT	CIC	NCF1	MAFB	SMPD1	SHF	AMOTL2	DDX21	ANK1	TMPRSS15	TBC1D15	C3orf38	PPA1	NUBP1	ZBTB2	APBA3	NUPR1	TGFBI	LTB4R	C5AR1	MAP7	TSPAN4	PIM1	ZIC3
GSE39152_BRAIN_VS_SPLEEN_CD103_NEG_MEMORY_CD8_TCELL_UP	http://www.broadinstitute.org/gsea/msigdb/cards/GSE39152_BRAIN_VS_SPLEEN_CD103_NEG_MEMORY_CD8_TCELL_UP	Sig454	TOR1AIP2	STAT1	CLIC4	ATF3	ATP1B3	NR4A3	FAS	RTN4	VCL	USO1	RAP1GDS1	MMP13	EMP1	NONO	IRG1	PFKP	ANKH	IL15	RNF19B	MT2A	ZNF281	SLC39A6	TINAGL1	FGFR1OP2	LSP1	SLC6A12	DRG1	PEBP1	ATAD3A	MDM2	LYRM2	PSMD6	EML5	MTDH	LASP1	MBNL1	RNASEH1	TBCA	TRAF1	CCT5	PPP1R15B	SLC25A28	NAV2	LGALSL	RALA	CXCL10	PTRF
GSE39152_SPLEEN_CD103_NEG_VS_BRAIN_CD103_POS_MEMORY_CD8_TCELL_UP	http://www.broadinstitute.org/gsea/msigdb/cards/GSE39152_SPLEEN_CD103_NEG_VS_BRAIN_CD103_POS_MEMORY_CD8_TCELL_UP	Sig455	LRWD1	HMOX1	LTB4R	NSMCE1	ARHGAP39	PHRF1	SH3BP5	HMGA1	TRAPPC3	CLIP3	LDHB	BMP8B	GATA2	UPK2	SLC10A1	MZT2B	RAB4B	RIMKLB	COL4A2	TMPRSS15	LHX1	ST3GAL2	C9orf72	CHFR	APBA3	CD151	CHRND	ATP1B1	GALNT2	SOAT2	ARFIP2	METTL18	CLTC	C19orf6	TMEM45A	CAND1	ATXN1	TWF2	PLA2G5	FAU	ABCA1	C11orf2	ZBTB2	TBR1	PTPN1	TECTA	GNPTAB
GSE40666_NAIVE_VS_EFFECTOR_CD8_TCELL_UP	http://www.broadinstitute.org/gsea/msigdb/cards/GSE40666_NAIVE_VS_EFFECTOR_CD8_TCELL_UP	Sig456	RALGPS2	APBB1	CSNK1E	PIP4K2A	CLCN4	DNTT	PHC1	CPM	ZNF799	EXPH5	BAZ2B	TSPAN6	SRSF10	TMEM59L	RASGRP1	LCMT1	ADCY6	ZC4H2	PCGF5	ZNF597	ALDH7A1	MEGF9	NCOA5	TOX	RBMS2	ABI3	ZNF512	MS4A1	SATB1	MARCKS	MAP3K7	RTN4RL1	EGR2	ARHGEF17	GALNT6	HMG20A	CALCOCO1	STAU2	CACNG4	SLC23A2	PLOD2	UBE2E3	TNIK	DLG3	TLE2	OBFC2A	PCM1
GSE40666_NAIVE_VS_EFFECTOR_CD8_TCELL_DN	http://www.broadinstitute.org/gsea/msigdb/cards/GSE40666_NAIVE_VS_EFFECTOR_CD8_TCELL_DN	Sig457	TTC32	PDE2A	COMTD1	EVI2B	MTHFD1L	AKR1E2	DTNBP1	AHR	RNF135	TNFRSF1B	AVEN	FASLG	RHOD	NCEH1	PGM1	CRELD2	ANKRD54	SOAT1	C7orf59	UBE2F	MYO1F	ATP8B4	MYC	TGIF1	F2RL2	RAB19	AGFG1	TRPV2	PLEKHA2	ISYNA1	DPY19L1	APPL2	SCRN2	NAAA	ACTR3B	MID1IP1	RCN1	PLAC8	LGALS1	PHACTR2	TMEM140	SHE	BLK	PSME1	NSMAF	DTX4	C1orf130
GSE40666_WT_VS_STAT1_KO_CD8_TCELL_UP	http://www.broadinstitute.org/gsea/msigdb/cards/GSE40666_WT_VS_STAT1_KO_CD8_TCELL_UP	Sig458	ARMCX1	TUBB	N4BP2	CCM2	KREMEN1	SMC6	RTN4RL1	IFIT1B	CLIC4	ADCY6	CBX4	STK4	NIM1	INPP5F	F13A1	PCGF5	FRY	SLC9A3R1	TMEM71	LETM2	TNIK	SLC35D2	AS3MT	LYST	FAM65B	TIPARP	RAB3IP	ZDHHC15	BCL3	MYO10	RELT	LRBA	BIRC3	PLXND1	RALGPS2	KCNN4	KIF24	TMEM120B	DAPK1	FOXP1	PPM1K	KIAA0247	MTSS1	RBM38	BCL6	PPP1R14C	FAM113B
GSE40666_WT_VS_STAT1_KO_CD8_TCELL_DN	http://www.broadinstitute.org/gsea/msigdb/cards/GSE40666_WT_VS_STAT1_KO_CD8_TCELL_DN	Sig459	EGR3	TNFSF10	GDPD5	PLS1	SPRY2	NAGA	LITAF	HGSNAT	S100A10	FURIN	FAM167A	FARP1	UNC119	ABHD4	TJP2	MRS2	ARHGAP26	RNPEP	TSPAN4	BAHD1	C1orf122	MAFG	MAGED1	KDELC2	METTL1	PHGDH	PTGES2	BLK	TNFRSF21	PRKAR2A	NRP1	TRPM6	AKR1E2	G6PC3	PTPN13	TTYH2	C6orf145	C12orf75	REXO2	CTSC	CCDC126	SLC12A2	PTPN9	IFI30	LYN	WWP1	AMZ1
GSE40666_NAIVE_VS_EFFECTOR_CD8_TCELL_WITH_IFNA_STIM_90MIN_UP	http://www.broadinstitute.org/gsea/msigdb/cards/GSE40666_NAIVE_VS_EFFECTOR_CD8_TCELL_WITH_IFNA_STIM_90MIN_UP	Sig460	ITGB7	THY1	TTC32	TMX4	NFIC	CD38	NACC2	TNFRSF25	SERINC3	CRIP1	PLEKHA3	IRGM	NKIRAS2	HYAL3	CNP	FASLG	SIKE1	SLC16A5	FBXL4	S100A6	STK38	LPCAT2	TIAM2	P2RX7	GPR34	GRASP	FAM129A	CCDC106	LOC100505876	ENDOG	ESRRA	IRF5	GPD1L	CD9	RAB21	CNN2	RAB33B	PNPLA7	DNAH8	GPR183	UBE2F	LATS2	WFIKKN2	FECH	FAM113B	LOC100505478	NKG7
GSE40666_NAIVE_VS_EFFECTOR_CD8_TCELL_WITH_IFNA_STIM_90MIN_DN	http://www.broadinstitute.org/gsea/msigdb/cards/GSE40666_NAIVE_VS_EFFECTOR_CD8_TCELL_WITH_IFNA_STIM_90MIN_DN	Sig461	N4BP2	FLOT1	MMP9	N4BP3	IPO11	SYTL2	SLC16A6	BAZ2B	SAMHD1	UBE2E3	PCDHGC4	EXT1	SRSF9	GREB1	SSR1	DNAJB6	ENDOU	AS3MT	MFSD10	PIK3R3	EMILIN1	CUX1	E2F3	NCOA5	POP1	SLC39A14	TOX	SPSB1	ILF3	CTPS	TGIF2	ATHL1	CENPJ	RNF149	YPEL2	KIFC3	SYCE2	JAZF1	TET1	DGCR2	MUM1	FAM100B	CD81	ENO2	WBP1	CCDC88A	LPHN1
GSE40666_WT_VS_STAT1_KO_CD8_TCELL_WITH_IFNA_STIM_90MIN_UP	http://www.broadinstitute.org/gsea/msigdb/cards/GSE40666_WT_VS_STAT1_KO_CD8_TCELL_WITH_IFNA_STIM_90MIN_UP	Sig462	HERPUD1	FBXL4	VTI1B	DAAM1	DENND5A	VMAC	FBXO22	SGK223	SLC35D2	NSMAF	AP1M2	CD3EAP	HYAL3	ARHGAP26	SLC4A1AP	LATS2	C20orf108	TPPP	FBXO8	CDIPT	RHOC	FAM101B	C1orf124	C7orf23	DEDD2	DSTN	LNX2	WWP1	PRDM1	ESYT2	GPN1	C9orf152	C19orf57	HSD11B1	WDR5B	TMEM55A	VPS28	SYNPR	NR1D2	SEPP1	CRTAM	TRAF3IP2	PMP2	LENG9	IGKC	CEBPG	POU2AF1
GSE40666_WT_VS_STAT1_KO_CD8_TCELL_WITH_IFNA_STIM_90MIN_DN	http://www.broadinstitute.org/gsea/msigdb/cards/GSE40666_WT_VS_STAT1_KO_CD8_TCELL_WITH_IFNA_STIM_90MIN_DN	Sig463	EXO1	EGR2	DHX58	TMEM64	ALMS1	ARMCX1	DNTT	NCOA7	ALDH2	CTSW	CENPP	RDBP	JAZF1	ZNF821	RWDD4	ABI2	AKAP1	RRAGD	BRCA2	C9orf3	SMC2	PLOD2	MCM10	PTGIR	POLE	MCM8	CAPG	IFIT1B	CCR9	H2AFZ	RAD54L	PARD6G	CBFB	SYCE2	MSN	CENPW	STAT5A	RNF213	TACC2	TLE3	C1orf130	NIM1	MFSD10	SOX4	NDRG1	PSTPIP2	TCF19
GSE40666_WT_VS_STAT4_KO_CD8_TCELL_WITH_IFNA_STIM_90MIN_UP	http://www.broadinstitute.org/gsea/msigdb/cards/GSE40666_WT_VS_STAT4_KO_CD8_TCELL_WITH_IFNA_STIM_90MIN_UP	Sig464	DAAM1	BMP2K	NOD1	HSD11B1	SMC6	ZFAND6	C2orf68	TNFRSF25	RASGRP1	C8orf58	FOXK1	TRIB2	SLC16A5	RASGRF2	TRAF3IP2	HERC4	TBXA2R	ACAP2	SQRDL	FMO5	IBTK	FAM113B	N4BP2L1	PHYHD1	TMEM63A	CDIPT	STIM2	SLC30A7	CNST	PACS2	PDE5A	ADRB2	ZBTB6	PTPRA	METTL20	TSC22D3	TERF1	THADA	WDR20	SETD4	TNIK	ACOXL	PACS1	MPP1	FLI1	RTN4RL1	NACC2
GSE40666_WT_VS_STAT4_KO_CD8_TCELL_WITH_IFNA_STIM_90MIN_DN	http://www.broadinstitute.org/gsea/msigdb/cards/GSE40666_WT_VS_STAT4_KO_CD8_TCELL_WITH_IFNA_STIM_90MIN_DN	Sig465	CD99	MAFG	RNF43	F2R	FAM162A	UBE2E2	ASNS	LRPPRC	KLRD1	FAM174B	SCRN2	APLP1	TDRD7	C6orf145	DHX58	ABI2	FRRS1	VAMP5	TJP2	TGIF1	MAGED1	B4GALNT4	CHEK1	CKS1B	TMEM126A	LCLAT1	PRKCH	COMTD1	S100A10	PTPRJ	MTHFD2L	ADAM8	PPA1	EIF4EBP2	IPO7	FAM167A	AHR	DTNBP1	PON3	SCARB1	WBP5	TRPV2	FTSJD2	SEMA4A	TSPAN4	SMYD2	SRM
GSE40666_STAT1_KO_VS_STAT4_KO_CD8_TCELL_WITH_IFNA_STIM_90MIN_UP	http://www.broadinstitute.org/gsea/msigdb/cards/GSE40666_STAT1_KO_VS_STAT4_KO_CD8_TCELL_WITH_IFNA_STIM_90MIN_UP	Sig466	COG5	PRCC	C19orf63	C12orf74	EXOC3	RPS11	TFDP2	GRAMD3	DHRSX	TALDO1	NR3C1	TYK2	C1orf21	EIF3H	NRGN	HTR2B	PYGO2	KIAA1524	RTF1	MYCL1	KBTBD6	HMGB3P1	COMMD3	SHKBP1	KCTD14	TXNDC11	MARK3	RSPRY1	KIAA0319L	DHX38	CYC1	BCOR	COX5B	DPY19L4	DIS3L	C9orf9	SPAG7	PRAF2	LOC653739	ZFP91	BBS12	ZNF250	RRNAD1	ARHGAP19	GMPS	ZNF436	PSMG1
GSE40666_STAT1_KO_VS_STAT4_KO_CD8_TCELL_WITH_IFNA_STIM_90MIN_DN	http://www.broadinstitute.org/gsea/msigdb/cards/GSE40666_STAT1_KO_VS_STAT4_KO_CD8_TCELL_WITH_IFNA_STIM_90MIN_DN	Sig467	CPXM1	GATA6	ANGPTL4	NMNAT3	TAX1BP1	SELK	LRP6	NOXO1	DIRAS2	SNORA78	LOC643037	IGHMBP2	CXCL2	WTIP	DOC2A	TNF	GKN1	OSM	BTG2	LOC115110	EGR1	C11orf53	CPLX1	LOC157627	LOC284570	WDR16	PLVAP	PPAP2C	CFLAR-AS1	NR4A2	SSTR2	LOC157931	ZNF467	F7	EGR3	ENAH	HTR1B	SNORA68	BAI2	LAG3	PJA2	SH2D1A	C1orf35	CEP104	C9orf62	TMEM88	SOCS3
GSE40666_STAT1_KO_VS_STAT4_KO_CD8_TCELL_UP	http://www.broadinstitute.org/gsea/msigdb/cards/GSE40666_STAT1_KO_VS_STAT4_KO_CD8_TCELL_UP	Sig468	CDCA7L	C9orf123	C14orf133	ZNF283	PPAPDC2	CUL4B	SNX14	KCTD3	CYC1	GPN2	CTDSP2	43530	PRIM2	C10orf26	DSTYK	RNF113A	SMG8	MBLAC2	DNTTIP1	TMEM9B	NDUFS8	AP2S1	HMGN5	KIAA1267	CIAO1	PI4KA	EXOC1	TRPC4AP	ACY1	LYL1	RFC2	HIBADH	SEC22A	MMADHC	BBS1	ANAPC10	RBMX2	TRAPPC5	QARS	TTC15	ZYX	SCAND1	ARHGEF6	UROS	CUEDC2	TLCD2	MTMR14
GSE40666_STAT1_KO_VS_STAT4_KO_CD8_TCELL_DN	http://www.broadinstitute.org/gsea/msigdb/cards/GSE40666_STAT1_KO_VS_STAT4_KO_CD8_TCELL_DN	Sig469	POLN	C19orf21	ICAM1	DOC2A	UBE2QL1	GRIK4	C11orf35	GUCA2B	ANO1	INSIG1	NECAB2	PRAMEF10	CSPG4	LOC286109	CEP104	ZNF653	CALR3	CCR10	OXCT2	PPY	FAM71E1	TMEM204	PKP2	TRPC2	LRP12	FBXO24	KRT3	SLC2A3	LOC284570	LOC440330	DCD	MAPK8IP2	PIM3	GPR56	HBM	NRXN3	ZMIZ1	HBQ1	FAM75C2	ACPT	ATP2B3	LOC728061	PTPRG	LOC401317	NRG1	COX6B2	FAM69B
GSE40666_WT_VS_STAT4_KO_CD8_TCELL_DN	http://www.broadinstitute.org/gsea/msigdb/cards/GSE40666_WT_VS_STAT4_KO_CD8_TCELL_DN	Sig470	BBS1	RMND1	CCDC88A	FAM108A1	ARSD	TXK	TMCO1	BRP44L	SLC2A4RG	PCNA	BBS12	DCAF10	CDCA7L	SIGLEC7	C15orf27	FXN	GLG1	TOR1AIP1	CUTA	UBA7	AP1M1	EID2B	RHBDD2	MBOAT1	SLFN11	WWP1	ABCC5	ACAD8	VPS53	DPY19L4	TXNDC12	MPPE1	LOC340947	C17orf100	SPA17	DZANK1	NT5DC1	C1orf53	ZMYND12	PRPSAP1	EXOC6B	CEP95	RDH10	TMEM59	SPRYD4	TP53INP1	ABCD4
GSE40666_UNTREATED_VS_IFNA_STIM_CD8_TCELL_90MIN_UP	http://www.broadinstitute.org/gsea/msigdb/cards/GSE40666_UNTREATED_VS_IFNA_STIM_CD8_TCELL_90MIN_UP	Sig471	PADI3	UBE2QL1	MUC4	CERS4	LOC643037	ALPI	CATSPERG	FLJ16124	LOC157627	UST	TMEM61	LOC100289094	GATA6	GOLGA4	MARCKSL1	ACPT	DDX51	GALR3	NECAB2	ANO8	FSCN2	C9orf30	MLL4	ARF6	VAV2	MX1	NRL	HSH2D	CPEB3	LIPG	DOT1L	UBE2E1	RHAG	ADCY5	EXTL1	KCNC2	LOC100506127	ENAH	PRIC285	CYP2B6	TNFAIP8	CNTF	LINGO1	NUDCD1	KRT3	LOC285768	EPSTI1
GSE40666_UNTREATED_VS_IFNA_STIM_CD8_TCELL_90MIN_DN	http://www.broadinstitute.org/gsea/msigdb/cards/GSE40666_UNTREATED_VS_IFNA_STIM_CD8_TCELL_90MIN_DN	Sig472	LOXL3	TMEM48	EFTUD2	TXK	DNAJB1	MTFR1	TEX264	CNPY3	ARMCX5	KLHDC3	LOC387723	RPS26	TSPAN32	CCP110	NAIP	CAMK2G	SFXN4	MAPKAPK3	TOR1AIP1	MSRA	POLR2L	CTBP2	C9orf123	MFAP3	WDR46	RHBDD2	FAM129B	CTH	DAGLB	PMPCA	PAK1	CENPQ	UTP11L	PTAFR	C7orf43	BRIX1	AKT1	MSH3	PIGH	ANKRD35	PLXND1	SMC5	RPAP2	NOL10	RG9MTD1	PTGS1	EIF2A
GSE40666_WT_VS_STAT4_KO_CD8_TCELL_UP	http://www.broadinstitute.org/gsea/msigdb/cards/GSE40666_WT_VS_STAT4_KO_CD8_TCELL_UP	Sig473	GUCY1B2	PKD1L2	SSTR2	UTS2R	FBXL19-AS1	DIRAS2	CPXM1	CYLC2	NFE2	LOC643037	LOC730631	TMEM238	GATA6	LMCD1	GABRA1	EPHB4	MCF2L-AS1	LOC100287951	FAM187B	KRT2	PRRT2	TCL1A	LOC731656	TPSG1	NKX2-1	DDI1	DOC2A	PCDHB6	GRK5	HLA-F	LOC100288944	SPRY1	C2orf71	FAM170A	GPR44	CCK	PIM1	CCR10	KRT19	PKP2	DHX58	POLN	HAND2	TDRD7	NRP2	H1FOO	TBX2
GSE40666_UNTREATED_VS_IFNA_STIM_EFFECTOR_CD8_TCELL_90MIN_DN	http://www.broadinstitute.org/gsea/msigdb/cards/GSE40666_UNTREATED_VS_IFNA_STIM_EFFECTOR_CD8_TCELL_90MIN_DN	Sig474	C1QBP	RAB4B	NAIP	ZNF263	CCT6B	AIG1	DTWD1	SLC12A9	CREB5	MYCBP	FITM2	TMEM48	SNX4	UHRF1	PAK1	ZNF193	AIFM1	FOXRED1	SKI	S100A4	TPRKB	SRSF2	IMPA2	CUTA	UQCRH	PI4KB	SRSF6	MAP7	MED31	MLF1IP	PHF17	GMFG	CLTA	MSRA	LSM4	STRAP	PMPCA	ZNHIT1	COX8A	SF3B14	ARV1	ERCC1	CLCN3	MAP2K6	ZNF609	ABHD16A	IFT74
GSE40666_UNTREATED_VS_IFNA_STIM_STAT1_KO_CD8_TCELL_90MIN_UP	http://www.broadinstitute.org/gsea/msigdb/cards/GSE40666_UNTREATED_VS_IFNA_STIM_STAT1_KO_CD8_TCELL_90MIN_UP	Sig475	MAPT	LY75	ACOT9	PCGF5	RERG	C1orf170	HIVEP1	PSAP	CYTH3	FAM49A	TNFAIP2	EPB41	MARCKS	C3orf65	MIR600HG	ANO2	HAND1	C6orf105	MX1	ABTB2	DHX58	CLDN14	BCL2L14	CLVS2	LOC440900	TMEM138	MYBL1	EPSTI1	SEMA3C	PLXNC1	ATF5	RSPRY1	HRASLS2	SH3D19	DFNA5	ADAR	NRP2	MMP9	ZNF705G	PRIC285	C15orf52	FLJ11710	LOC731656	B2M	FAM134B	IL9R	SNX15
GSE40666_UNTREATED_VS_IFNA_STIM_STAT1_KO_CD8_TCELL_90MIN_DN	http://www.broadinstitute.org/gsea/msigdb/cards/GSE40666_UNTREATED_VS_IFNA_STIM_STAT1_KO_CD8_TCELL_90MIN_DN	Sig476	SELPLG	KCNG1	HSF5	PRICKLE1	ATP10D	BACH2	CRIP3	CD72	ZNF471	RAD23B	TREML2	TMEM71	CALCRL	PLEKHA2	FCER2	JARID2	LOC613266	KIAA1467	BCL6	CD40	C5orf13	MYO1B	ZNF880	UBE2E2	SULT1B1	ZCCHC7	CTNND1	SH3BP2	VAV3	NRIP1	BTG1	ARHGAP32	MAML3	SESN1	CHRAC1	PHLDB2	SAV1	UBE2R2	ZNF135	DHX40	ENAH	TRPS1	BEND5	CAMK2D	PECAM1	ABCB4	PLEKHA1
GSE40666_UNTREATED_VS_IFNA_STIM_EFFECTOR_CD8_TCELL_90MIN_UP	http://www.broadinstitute.org/gsea/msigdb/cards/GSE40666_UNTREATED_VS_IFNA_STIM_EFFECTOR_CD8_TCELL_90MIN_UP	Sig477	BAIAP3	CORO7	TLE3	BCAT1	CDYL2	BHLHE40	ZBTB7A	CTSL2	ACP5	TMEM104	BMF	TAP1	COL4A4	CD151	CRIP1	EBI3	SLC1A5	ARHGAP31	OSBPL10	KIAA1486	COX6A1	EHD1	SCARB1	TNIP2	VOPP1	RORA	ITPRIPL2	PTP4A3	PLCG2	FAS	MYO1F	ARHGAP44	STK38L	ALOXE3	KPNA2	CHAD	C12orf74	TIGIT	TFDP1	PDE1B	MVP	SYNPO	MNS1	TRERF1	TWF1	HFE	CAPG
GSE40666_UNTREATED_VS_IFNA_STIM_STAT4_KO_EFFECTOR_CD8_TCELL_90MIN_DN	http://www.broadinstitute.org/gsea/msigdb/cards/GSE40666_UNTREATED_VS_IFNA_STIM_STAT4_KO_EFFECTOR_CD8_TCELL_90MIN_DN	Sig478	MAP3K8	C1orf162	ATP10D	PHF1	KDM4C	TMEM2	SH2D3A	RNF141	WWC3	KLF9	FRYL	BTG1	TAF3	UBE2E2	STRADB	NRIP1	ALS2CR12	FAM169A	JARID2	BEND5	ZNF154	ENAH	TMPO	UTRN	ZNRD1-AS1	TRAK2	FIGF	TXNIP	PIK3IP1	APLP2	STX7	VAV3	PAIP2B	C2orf67	WHSC1L1	PGGT1B	MGC27345	PHC3	TREML2	ZNF649	THRB	IRF8	INPP5A	KIAA2018	C9orf82	TMCO7	ZNF514
GSE40666_UNTREATED_VS_IFNA_STIM_STAT4_KO_EFFECTOR_CD8_TCELL_90MIN_UP	http://www.broadinstitute.org/gsea/msigdb/cards/GSE40666_UNTREATED_VS_IFNA_STIM_STAT4_KO_EFFECTOR_CD8_TCELL_90MIN_UP	Sig479	SLCO3A1	SH3BGRL3	PTPN1	PLK4	VDR	NAPSA	TFDP1	DPYSL2	SLAMF7	CASP10	ITPRIPL2	CD151	LTK	HIPK2	MTMR14	CDYL2	CPPED1	RNFT2	HN1	S100A11	SPATS2	TCIRG1	FAM102A	C10orf54	DAXX	ITGAX	UBE2G1	C6orf105	C12orf74	ASNA1	KEAP1	HPGD	PTAFR	EBI3	HYOU1	ZBTB32	ZDHHC16	MRPL4	SND1	HMOX2	BHLHE40	RASGRF1	ZBP1	BAIAP3	XBP1	DCPS	DNAH8
GSE40225_WT_VS_RIP_B7X_DIABETIC_MOUSE_PANCREATIC_CD8_TCELL_UP	http://www.broadinstitute.org/gsea/msigdb/cards/GSE40225_WT_VS_RIP_B7X_DIABETIC_MOUSE_PANCREATIC_CD8_TCELL_UP	Sig480	CLCN4	CLCF1	SENP7	RASGRP2	ZBTB10	RBM6	PHF15	ZNF789	SEPN1	TTC21A	SMG1	CHL1	C2orf67	PTGS1	KCNG1	USP44	TRAK2	BACH2	LPGAT1	EVL	FBXW4P1	CDK5R1	RNF219	FMNL3	RTN4IP1	FCHSD2	SNX27	RAB11FIP1	PSIP1	ZC3HAV1	RASA1	DOCK2	PTPN6	ZNF358	ZNF528	KIAA0247	FLJ39653	PUM1	ZSCAN29	PLSCR1	TMCO7	AP4S1	ANKRD44	PLEKHF2	ZNF619	TMED8	ZDHHC23
GSE40225_WT_VS_RIP_B7X_DIABETIC_MOUSE_PANCREATIC_CD8_TCELL_DN	http://www.broadinstitute.org/gsea/msigdb/cards/GSE40225_WT_VS_RIP_B7X_DIABETIC_MOUSE_PANCREATIC_CD8_TCELL_DN	Sig481	DUSP16	MAD2L1	CDIPT	MT2A	PPAT	SSR4	PGM3	MDH2	SESN2	SSSCA1	HIST1H3I	MFSD2A	CLDND1	PMVK	BSCL2	MAN2A1	ZC3HAV1L	PSEN2	NDUFB7	HIST1H3H	HN1	SRP72	ADRM1	CENPI	CCNE2	FRRS1	MCRS1	FTSJ1	CAMKK2	CENPA	NECAB3	ARFGAP3	GALNT1	UCHL5	UAP1	HIST1H2BI	ULK2	UBE4A	BCAR3	MYCBP	TMEM184B	IFNAR1	MTRR	SRP68	KIF4A	ATG13	ECHS1
GSE39110_UNTREATED_VS_IL2_TREATED_CD8_TCELL_DAY3_POST_IMMUNIZATION_DN	http://www.broadinstitute.org/gsea/msigdb/cards/GSE39110_UNTREATED_VS_IL2_TREATED_CD8_TCELL_DAY3_POST_IMMUNIZATION_DN	Sig482	NUP62	ESM1	NPLOC4	TMPO	CD81	APIP	ATP1A2	FARP1	MAPRE2	RAB6A	SH2D2A	DNA2	CIT	PDSS1	VASH1	CBFB	CARHSP1	UBR7	TPBG	CCDC41	ANGPTL2	G2E3	RPA2	STIL	RBM44	STK39	BMP2K	WDR62	SOD1	ICA1	CA13	PMCH	RPA1	CLIC4	CASP7	ACTG1	C6orf168	PRICKLE3	DUSP14	POLE	PMVK	FUT4	EXPH5	GPD2	LGALS1	LSM2	DAP
GSE39110_DAY3_VS_DAY6_POST_IMMUNIZATION_CD8_TCELL_UP	http://www.broadinstitute.org/gsea/msigdb/cards/GSE39110_DAY3_VS_DAY6_POST_IMMUNIZATION_CD8_TCELL_UP	Sig483	BTG2	AUH	TRAF1	TCF7	IL7R	GPR68	CCL22	HSD17B11	NOP10	TAGAP	C8orf42	PADI2	KIAA0930	WWP1	LAT	PLEKHM3	AMIGO2	CARD6	VPS28	NME2	BCL2	RGS10	VIPR1	BTG1	SLFN5	HVCN1	FAM101B	RPS11	RAB37	CRIM1	KLK8	METTL20	KCNJ8	SLC9A9	ALG1	TRMT112	MMP23B	ACSS1	STX4	KLRD1	LOC283174	ADI1	TLR1	FAM46A	SEPP1	MCCC2	C17orf39
GSE39110_DAY3_VS_DAY6_POST_IMMUNIZATION_CD8_TCELL_DN	http://www.broadinstitute.org/gsea/msigdb/cards/GSE39110_DAY3_VS_DAY6_POST_IMMUNIZATION_CD8_TCELL_DN	Sig484	C11orf82	SPC25	PRR11	FIGNL1	ESCO2	SCCPDH	ZFPM1	DNA2	ZBTB32	C3orf15	SNRPA	TPI1	TTK	DPAGT1	E2F3	GEN1	NEK2	NDRG1	PERP	NUF2	PBK	DNASE1L3	PLXDC2	TNS1	CCNF	CERCAM	HHEX	C12orf11	CDKN1A	WARS	DEPDC1B	POU2F2	KIF20A	CDC6	GMNN	KIAA0101	CYP11A1	KPNA2	CDCA5	LGALS1	XYLB	BLMH	SHCBP1	PAICS	MYBL2	PLAC8	LIG1
GSE39110_UNTREATED_VS_IL2_TREATED_CD8_TCELL_DAY3_POST_IMMUNIZATION_UP	http://www.broadinstitute.org/gsea/msigdb/cards/GSE39110_UNTREATED_VS_IL2_TREATED_CD8_TCELL_DAY3_POST_IMMUNIZATION_UP	Sig485	C8orf42	APP	LFNG	IL7R	RPS7	PDE8A	SCML4	ARHGAP5	FAM46A	DNAJB2	PRSS12	IFITM10	ST3GAL6	HIST3H2A	CKLF	CYP4V2	CFLAR	ZNF263	C6orf105	TRIM56	BIRC2	LCE3B	ATXN1L	EIF4A2	PIP5K1B	ZMYND11	CACNA2D4	ELF2	AMIGO2	ARID1A	PGLYRP2	SMAD1	PCTP	ACIN1	FAM101B	RPS16	KIF5C	RNASE3	PLEKHH3	SIT1	HEXA	TSC22D3	PAG1	TMEM206	GPRASP1	MAP3K9	DDR1
GSE39110_DAY3_VS_DAY6_POST_IMMUNIZATION_CD8_TCELL_WITH_IL2_TREATMENT_UP	http://www.broadinstitute.org/gsea/msigdb/cards/GSE39110_DAY3_VS_DAY6_POST_IMMUNIZATION_CD8_TCELL_WITH_IL2_TREATMENT_UP	Sig486	CENPH	COMT	C11orf31	ACOT4	FBXO5	ASF1B	OAS1	ACADL	LACC1	GDI2	UBE3B	FGFR1OP	CCR5	ROPN1L	OPTN	SUCLG1	PERP	TK1	TPX2	EHD4	BEND4	SCCPDH	DIAPH3	TMIGD1	HMGCR	ALMS1	DTNBP1	PTCD1	C12orf75	HAP1	DDX28	ISG15	BRI3BP	SPC25	TARDBP	SHCBP1	BRIP1	PFKM	IKZF3	PGGT1B	TXN	TIMP2	MELK	BLMH	MRPL18	COX6B1	TPCN2
GSE39110_DAY3_VS_DAY6_POST_IMMUNIZATION_CD8_TCELL_WITH_IL2_TREATMENT_DN	http://www.broadinstitute.org/gsea/msigdb/cards/GSE39110_DAY3_VS_DAY6_POST_IMMUNIZATION_CD8_TCELL_WITH_IL2_TREATMENT_DN	Sig487	RPS11	LFNG	CREB3	ZBTB4	SNAI3	TROVE2	HSD11B1	EYA2	GLIPR1	KLF6	SETD6	CYP4V2	ATN1	IMPACT	PPRC1	ST3GAL6	HSDL1	LYST	EPAS1	CNTFR	SEMA4F	PLEKHM2	TMEM209	DTX4	DNAJC15	RPS15A	ZC3H6	SGK1	C9orf142	SMARCA2	MGAT4A	KCTD6	ZSWIM5	APP	ARHGAP15	IL4R	ZNF652	SERINC4	TSC22D3	EID2	MYBBP1A	PRPF6	GPR65	SGMS1	C7orf41	CBX7	CLYBL
GSE39110_UNTREATED_VS_IL2_TREATED_CD8_TCELL_DAY6_POST_IMMUNIZATION_UP	http://www.broadinstitute.org/gsea/msigdb/cards/GSE39110_UNTREATED_VS_IL2_TREATED_CD8_TCELL_DAY6_POST_IMMUNIZATION_UP	Sig488	ADAM8	SLAMF7	FRY	PLEK	LGALS3	KCNK5	PLAC8	ARHGAP18	BHLHE40	PLP2	APOBR	CD7	TMEM37	CXCR6	EML3	PILRB	ZEB2	LPIN1	LGALS1	IQGAP2	MYL4	ITGAX	FHL2	SMPDL3B	MKI67	CCL5	FCGR2B	S1PR5	YES1	IL2RB	F2R	NHSL2	DKKL1	GPC1	NOD1	SLC41A2	TXNDC5	CD47	GATA3	NUDT4	FAM19A3	ITGA1	NKG7	CRIP1	ANXA1	B4GALT1	SELPLG
GSE39110_UNTREATED_VS_IL2_TREATED_CD8_TCELL_DAY6_POST_IMMUNIZATION_DN	http://www.broadinstitute.org/gsea/msigdb/cards/GSE39110_UNTREATED_VS_IL2_TREATED_CD8_TCELL_DAY6_POST_IMMUNIZATION_DN	Sig489	TCF7	HIF1A	SLAMF6	FAM101B	CCDC126	SEMA7A	NUCB2	MATK	MYB	EGR2	NAV2	GLIS3	LRIG1	RPA1	FAM3C	ATP1B1	CD200	CXCR5	PACSIN1	EPHX1	KIF5C	TSPAN13	KCNC2	LIPA	CD81	PLAGL1	GPM6B	LUC7L2	TIAM1	CYTH3	GCNT1	CYLD	MSRB2	HMGN3	MFHAS1	LDHB	ADK	SLC16A5	ATP6V1D	TSPAN3	FAM104A	IL6ST	KDM6B	AFF3	OAZ2	PDK1	SHANK3
GSE33292_DN3_THYMOCYTE_VS_TCELL_LYMPHOMA_FROM_TCF1_KO_DN	http://www.broadinstitute.org/gsea/msigdb/cards/GSE33292_DN3_THYMOCYTE_VS_TCELL_LYMPHOMA_FROM_TCF1_KO_DN	Sig490	CDKN2C	AFF3	NKX2-8	MYB	TNFRSF17	CDKN2D	EPHX2	KIAA1199	ICK	CCNA1	NCAPD3	CAMSAP1	RIMS3	ROCK1	NEK2	CDC25C	SPRED2	ADAM23	APOBEC3B	GAS7	SEC14L1	LAMA5	IQGAP2	RDH16	PAK4	PLA2G5	SMC4	ZCCHC14	BCL9	ROR1	CD38	GUCY1B3	BCL2L1	KRT83	SSFA2	TMSB15A	DGCR9	SERPINF1	POU1F1	ERI2	GORASP1	P4HA2	SLC17A1	WASF1	ARHGAP11A	ZCCHC24	PRTN3
GSE33292_DN3_THYMOCYTE_VS_TCF1_KO_TCELL_LYMPHOMA_UP	http://www.broadinstitute.org/gsea/msigdb/cards/GSE33292_DN3_THYMOCYTE_VS_TCF1_KO_TCELL_LYMPHOMA_UP	Sig491	ABCA3	ALOX5AP	MS4A1	CD1C	ABLIM1	FAM153B	C1QBP	PTPN22	PPP1R16B	KAT2A	IL27RA	MT2A	P2RY14	SH3BP5	MTSS1	PNO1	PCCB	NTNG1	CR2	LTB	MAP3K8	TRAF3IP2	ANXA4	HLA-DOB	CDC34	PLEK	SLC7A7	GABBR1	CD55	IL4R	TRAT1	LIPA	PTPRK	GALC	WDR43	TXN	ACE	APRT	MTHFD1	AHCY	HSPB1	GCLC	GTF2H5	WDR18	LGALS2	MRPS18B	KLF9
GSE33292_DN3_THYMOCYTE_VS_TCELL_LYMPHOMA_FROM_TCF1_KO_UP	http://www.broadinstitute.org/gsea/msigdb/cards/GSE33292_DN3_THYMOCYTE_VS_TCELL_LYMPHOMA_FROM_TCF1_KO_UP	Sig492	ABCB7	UGGT1	NME1	BCL7A	PRKX	ABI2	SUGT1	TCP1	PSME4	GCC2	RNF141	TEX9	RAP2A	RGS10	MSH2	IFT52	AP4E1	YTHDC1	CDIPT	HNRNPH2	MTCH2	SMARCA5	NXT2	CSTF3	TOB1	NBAS	NPRL3	SRPK1	RG9MTD1	TUBGCP6	HAT1	SYNCRIP	PWP2	NUP93	PCF11	ZEB1	ATR	VKORC1	DCUN1D1	BTF3L4	UROS	ZDHHC23	RSU1	CHMP1B	GPR155	NOP16	C12orf66
GSE33292_DN3_THYMOCYTE_VS_TCF1_KO_TCELL_LYMPHOMA_DN	http://www.broadinstitute.org/gsea/msigdb/cards/GSE33292_DN3_THYMOCYTE_VS_TCF1_KO_TCELL_LYMPHOMA_DN	Sig493	ABLIM3	CCDC42	SETD1B	IL3RA	SPRR4	LRRC9	CDC42EP5	RPUSD1	CECR5	STX11	NRIP3	GDF10	SIGLEC5	FAM3B	MRPS11	MS4A14	PTK2B	CD99L2	NGFR	PLEC	TMPRSS7	ADAMTS10	PROZ	FCER1G	NFYB	PINK1	CHST5	ITPK1	AQP5	FRAT1	SNX10	FAM176B	HMX1	KCNN4	PTPRD	CLK3	KCNIP2	PLEKHF1	CD302	ZFYVE28	HERPUD1	TWF2	ATP6V1E1	RNF144A	AGFG2	TECTB	CALCOCO1
GSE41867_DAY8_VS_DAY15_LCMV_CLONE13_EFFECTOR_CD8_TCELL_UP	http://www.broadinstitute.org/gsea/msigdb/cards/GSE41867_DAY8_VS_DAY15_LCMV_CLONE13_EFFECTOR_CD8_TCELL_UP	Sig494	PCNX	RDH10	SF1	CELF2	COL4A3BP	C3orf37	KCTD3	MTMR3	FOXP1	CEP57	LEMD2	PPP2R1A	CPM	BCL10	MTMR12	SNX33	C15orf61	KALRN	ZCCHC6	RNF125	SRSF6	ITPKC	DUSP5	BCL7B	TMEM66	AZI2	LRRC33	IL7R	MYO7B	PCM1	SH3PXD2A	IL10	CEP120	NXF1	KIAA1468	BSDC1	FKBP7	CRIP1	MOB4	USP6NL	KRIT1	SMG6	MDN1	CD93	WASL	GLA	SIDT2
GSE41867_DAY8_VS_DAY15_LCMV_CLONE13_EFFECTOR_CD8_TCELL_DN	http://www.broadinstitute.org/gsea/msigdb/cards/GSE41867_DAY8_VS_DAY15_LCMV_CLONE13_EFFECTOR_CD8_TCELL_DN	Sig495	SCLY	RPS19BP1	RBM12	SNAPC2	HSPB11	PUS10	PRPF31	MARS	DBR1	POLR1D	SLMO2	COQ3	G2E3	DRG1	RGS12	MED8	ALG5	SNRPD1	CKAP2	MAPRE2	KIAA0494	KCTD1	NMT1	CCDC127	STX12	CCDC162P	THOC3	ULBP1	TRAPPC6A	WIPF1	WDR76	ZCCHC17	WDR7	DCTN2	CDC25C	CD320	TEKT3	NANS	MVD	ALAS1	PSMD9	HMGA2	QPCT	NDUFA5	OVCA2	GNPAT	TDP1
GSE41867_DAY15_EFFECTOR_VS_DAY30_EXHAUSTED_CD8_TCELL_LCMV_CLONE13_UP	http://www.broadinstitute.org/gsea/msigdb/cards/GSE41867_DAY15_EFFECTOR_VS_DAY30_EXHAUSTED_CD8_TCELL_LCMV_CLONE13_UP	Sig496	FBXO33	ACOT8	EVL	LEPRE1	FKBP15	DRGX	TRAPPC1	SERTAD3	MCTP1	EPSTI1	TDRD7	PEX2	C1orf49	IGHMBP2	KCNAB2	ART5	MED28	TNFSF11	ZBP1	IP6K1	TLR4	TMEM98	PRKCD	STK40	TBRG1	C1orf54	SH3BP2	SPATA6	DHX58	TAPBP	FAM100B	TP53BP1	CASP9	C9orf64	ZNF580	LYN	STK10	CHMP5	RBM43	GCA	C12orf35	MYO1F	ZFPM1	RERE	NCOA7	CD86	C19orf66
GSE41867_DAY15_EFFECTOR_VS_DAY30_EXHAUSTED_CD8_TCELL_LCMV_CLONE13_DN	http://www.broadinstitute.org/gsea/msigdb/cards/GSE41867_DAY15_EFFECTOR_VS_DAY30_EXHAUSTED_CD8_TCELL_LCMV_CLONE13_DN	Sig497	DCUN1D5	SCRIB	SGSM3	SCAMP2	THAP4	SLC30A4	RUFY1	EIF2S2	EML4	C7orf42	ATP13A3	MCART1	ADNP	ECHDC1	HIBCH	ZBTB2	MCMBP	UBXN2A	ME2	IFRD2	NT5C3L	TAF4	CDS2	CLPX	NCOA3	USP16	ZNF280C	GALC	LSS	TMED2	COMTD1	RAB18	NPM3	HAUS6	KCTD13	TAF5	GFER	YES1	TARDBP	UCHL3	TNFSF9	NUDT17	SDC1	DNMT3B	FAM108A1	PUS3	NOL11
GSE41867_NAIVE_VS_DAY6_LCMV_EFFECTOR_CD8_TCELL_UP	http://www.broadinstitute.org/gsea/msigdb/cards/GSE41867_NAIVE_VS_DAY6_LCMV_EFFECTOR_CD8_TCELL_UP	Sig498	C20orf30	PTGS1	GEMIN8	MED12	NADK	AKR1A1	TAPBP	HPS3	ACTR1A	KATNA1	ZNF691	COA5	MYL12B	LPHN2	LPCAT1	SH3GLB1	ZBP1	C9orf93	RAB7L1	HPS6	SLC44A2	PCGF3	CIB1	CYFIP1	DTX1	LAT2	KIAA0922	SAMD9L	NLRC5	PSMB9	ARHGAP25	IFT140	VPS37B	WASF2	GBP6	GNS	C19orf12	PNP	RCAN1	TRIM25	SLC31A2	PPP1R21	SUMO3	IL27RA	PPM1H	ARHGAP4	CD300LB
GSE41867_DAY6_VS_DAY8_LCMV_ARMSTRONG_EFFECTOR_CD8_TCELL_UP	http://www.broadinstitute.org/gsea/msigdb/cards/GSE41867_DAY6_VS_DAY8_LCMV_ARMSTRONG_EFFECTOR_CD8_TCELL_UP	Sig499	NUBP1	RAP1A	ANKLE2	DNAJC3	SPAG9	SLC2A6	TAF5L	BPGM	FANCL	KRT10	TACSTD2	CMAS	QARS	COPS4	RIOK1	BID	RNASEH2A	BZW2	MYO7B	CPEB3	C10orf54	MFSD10	GYG1	IBA57	ANTXR2	H2AFX	PIGY	SLC30A5	DNAJB11	KHDRBS1	DYNLT3	RPL28	GALNT2	BIRC6	RAB33B	CDKN3	B3GNT9	CENPL	MUC1	POGZ	ADH5	STT3A	MAMDC2	DENND2D	CD48	SPATA5L1	TMEM97
GSE41867_DAY6_VS_DAY8_LCMV_ARMSTRONG_EFFECTOR_CD8_TCELL_DN	http://www.broadinstitute.org/gsea/msigdb/cards/GSE41867_DAY6_VS_DAY8_LCMV_ARMSTRONG_EFFECTOR_CD8_TCELL_DN	Sig500	METTL21D	LYPLA2	CBWD2	FUBP3	JMJD4	MED29	SPAG7	NUP188	ALDH9A1	MPHOSPH6	C19orf40	REXO4	MTM1	STRA13	TNFSF11	IFRD1	FASN	LZIC	MRPL17	ELOVL6	MDN1	SRP54	CCT5	UBXN8	NDUFS7	MED30	HSPA8	TIMM8B	MANF	NDUFA4	RBMXL1	SWAP70	TMEM177	AIMP2	UTP3	MRPL52	PCBD2	ALDH18A1	TBC1D10A	PIGY	TRMU	RCE1	SNRPD3	CHAMP1	ALG11	METAP2	CEP63
GSE41867_DAY6_EFFECTOR_VS_DAY30_MEMORY_CD8_TCELL_LCMV_ARMSTRONG_UP	http://www.broadinstitute.org/gsea/msigdb/cards/GSE41867_DAY6_EFFECTOR_VS_DAY30_MEMORY_CD8_TCELL_LCMV_ARMSTRONG_UP	Sig501	TRIM59	ZNF498	MED12	EP300	GKAP1	SP110	C19orf12	CYBASC3	ITPR2	C17orf59	WTIP	RNASET2	ADAMTS10	EIF3H	PSMB9	IFI27L2	HPS6	CCPG1	VPS37B	DCTN2	NCKAP1L	SLC23A2	TNFRSF18	ZBTB24	KCNN4	SMARCA2	LIMK2	MAP3K10	LGALS1	GLG1	FMO5	FERMT3	PPP3CA	CARD11	UAP1L1	POLG2	MXD1	UBE2W	EIF3K	GRINA	S1PR4	HIST1H2BB	TERF2	GANC	TIGD2	PTPN6	P2RX4
GSE41867_DAY6_EFFECTOR_VS_DAY30_MEMORY_CD8_TCELL_LCMV_ARMSTRONG_DN	http://www.broadinstitute.org/gsea/msigdb/cards/GSE41867_DAY6_EFFECTOR_VS_DAY30_MEMORY_CD8_TCELL_LCMV_ARMSTRONG_DN	Sig502	SDF2	ITK	MTA3	PDE2A	CCBP2	CHD6	CLNK	FAM53C	CBL	FGD2	TPRG1L	C10orf46	UAP1	UNC93B1	KLF7	FAM193B	FAM108B1	ATP2A3	PCNXL3	CDT1	LAT	RASA3	MKNK1	KRTCAP3	MYH9	BSDC1	MYO1E	EVL	TAOK3	RAPGEF1	IQGAP1	TSC22D2	ERP29	ARSK	CSGALNACT2	LRRK2	VAT1	F2R	ANKRD13D	GNAQ	NCOA6	TGFBRAP1	PHF21A	DUSP5	AP4B1	INPP5K	DYNLT3
GSE41867_DAY8_EFFECTOR_VS_DAY30_MEMORY_CD8_TCELL_LCMV_ARMSTRONG_UP	http://www.broadinstitute.org/gsea/msigdb/cards/GSE41867_DAY8_EFFECTOR_VS_DAY30_MEMORY_CD8_TCELL_LCMV_ARMSTRONG_UP	Sig503	ZC3HAV1	IFIT1	GYPC	DIEXF	DTX3L	TTC4	ACP1	SDR39U1	SUCLA2	CLPX	ORC4	GUK1	ARV1	DZIP3	RBBP9	UBXN2B	XRCC5	WBSCR16	IFT74	EED	TAF12	TSSC4	NDUFA2	FAM177A1	DARS	ESF1	ALG5	PSMD3	COX6B1	PSMC3	PPIA	ACTR3B	DARS2	LETM1	CCNC	PCCB	TXNL4A	ANAPC11	GSG2	TPD52L2	SIKE1	CBX3	YTHDF2	SRP19	OVCA2	ZNF259	ZNF708
GSE41867_NAIVE_VS_DAY6_LCMV_EFFECTOR_CD8_TCELL_DN	http://www.broadinstitute.org/gsea/msigdb/cards/GSE41867_NAIVE_VS_DAY6_LCMV_EFFECTOR_CD8_TCELL_DN	Sig504	KRTCAP3	MAP1LC3A	TPST2	ATP10D	CERK	PCMTD1	SF1	LNPEP	TLN1	TGFBRAP1	KLF7	ITK	MAFG	LUC7L	INPP5F	TBC1D20	TOP3B	FILIP1L	43527	LRRK2	CEP70	DYNC1LI1	CHD6	TPRG1L	DVL1	MYL12B	PPP1R16B	DCAF15	CSGALNACT2	FAM49A	ANGEL2	SMG6	C12orf44	TAOK3	SWAP70	OPALIN	ZNF692	DENND1B	HSD17B11	ZMYM5	ACSL1	C1orf54	TRIM26	FAM65B	TFEB	FOXN3	SESN3
GSE41867_NAIVE_VS_DAY8_LCMV_EFFECTOR_CD8_TCELL_UP	http://www.broadinstitute.org/gsea/msigdb/cards/GSE41867_NAIVE_VS_DAY8_LCMV_EFFECTOR_CD8_TCELL_UP	Sig505	STOX1	C4orf46	YES1	THOC7	INTS4	PLAGL2	COX6A2	THOP1	IKBIP	ICA1	CMC1	GPI	SENP1	MVD	MRPL32	C3orf54	PGAM5	CMPK2	SPEF1	SLC25A10	C3orf26	MAGED1	EIF3I	PRPF31	MLF2	UCHL3	RCBTB2	C12orf73	BATF3	GPHN	SGCB	ULBP1	ATF6	RBM12	LATS1	COX17	DDIT4	TECR	RRP1B	EIF2D	NFIL3	UBE2M	FAM176B	KDELR3	PREP	SAMHD1	SIGMAR1
GSE41867_NAIVE_VS_DAY8_LCMV_EFFECTOR_CD8_TCELL_DN	http://www.broadinstitute.org/gsea/msigdb/cards/GSE41867_NAIVE_VS_DAY8_LCMV_EFFECTOR_CD8_TCELL_DN	Sig506	CYTH1	INPP5F	MYO1E	ACCS	NR3C1	PHF21A	CCBP2	PDE2A	ANKRD13D	CTBP1	C15orf39	AFF3	LAT	MYSM1	RAB33B	EIF1	POLR3GL	SLC44A2	FAM49B	ING2	MAFG	ITPKC	SERINC3	RAB4B	STX16	DYNLT3	RNF167	FAM193B	E4F1	NUMB	CD28	SRSF6	CEP57	PCNX	BSDC1	GNGT2	AVL9	SETD7	TMEM66	ARPM1	RPL17	GCOM1	VAT1	F2R	SAMD4B	TOP2B	MXD4
GSE41867_NAIVE_VS_DAY15_LCMV_EFFECTOR_CD8_TCELL_UP	http://www.broadinstitute.org/gsea/msigdb/cards/GSE41867_NAIVE_VS_DAY15_LCMV_EFFECTOR_CD8_TCELL_UP	Sig507	NPAT	C12orf23	EXOSC5	XRCC5	ACTA1	SUCLA2	SLAMF7	CCDC34	GALE	OVCA2	SIKE1	LSM7	SPCS1	MTG1	HTT	FABP5	ADH5	CYB5R1	HSPA13	MCMBP	POLD3	ARV1	DET1	ZNF213	TOR1B	ANAPC11	C14orf133	C9orf123	NDUFB3	IFIT1	C10orf2	OGFR	SNUPN	INTS4	BMS1	UQCRC2	DTX3L	SDR39U1	COPS2	CSNK2A2	DIEXF	ZNF259	PTGES2	STARD4	ABCF1	PIN4	RGS12
GSE41867_NAIVE_VS_DAY15_LCMV_EFFECTOR_CD8_TCELL_DN	http://www.broadinstitute.org/gsea/msigdb/cards/GSE41867_NAIVE_VS_DAY15_LCMV_EFFECTOR_CD8_TCELL_DN	Sig508	MKNK1	VPS39	INPP5F	FGD2	TPST2	BCL7B	HPS3	BCAS3	CCBP2	TPRG1L	MAP1LC3A	NPC1	CBL	SIDT2	FAM193B	C9orf5	UAP1	ATP1B1	ADCK4	ARPM1	DVL1	ZCCHC6	TAF5L	C12orf44	KHNYN	EARS2	KIAA1737	SF3B1	AFF4	STX17	RNF125	NXF1	DDX50	SAR1A	TPCN2	COQ10A	FAM65B	GRAMD3	TOP3B	PCM1	FBXL17	SKI	SELT	PIKFYVE	GIMAP6	MTMR3	CDKN2AIP
GSE41867_NAIVE_VS_EFFECTOR_CD8_TCELL_UP	http://www.broadinstitute.org/gsea/msigdb/cards/GSE41867_NAIVE_VS_EFFECTOR_CD8_TCELL_UP	Sig509	C6orf225	ALAS1	E2F3	CCDC34	KIAA0664	LETM1	SEC23A	MRPS36	NEURL2	GPI	CTNNBIP1	ZNF708	ARFGAP3	OBFC2A	AACS	OTUD6B	ACTR3B	KIAA0196	POLR1D	TECPR2	TSPYL4	WDR77	MCEE	MVD	STT3A	ETV5	NOB1	ATP11A	ANAPC5	DERA	PARP11	NPAT	RAB8B	ANAPC11	MEN1	HDAC3	TJP2	ANP32E	SPRED3	GNPAT	UQCRC2	GBP7	IFIT1	SPINK5	DDX27	PECR	RRP1B
GSE41867_NAIVE_VS_EFFECTOR_CD8_TCELL_DN	http://www.broadinstitute.org/gsea/msigdb/cards/GSE41867_NAIVE_VS_EFFECTOR_CD8_TCELL_DN	Sig510	RBMXL1	GMNN	KPNA6	RCC1	KPNA4	IPO11	CCT2	TCTEX1D2	RPP14	C6orf125	ELP4	COPS7B	C20orf7	ROMO1	NOL8	SMN1	PFAS	RSL24D1	SERPINB9	MRPS18B	CSE1L	WBSCR16	PPHLN1	NTPCR	LSM10	ZSCAN22	C9orf64	IMMT	CCT4	PSMD6	CAPRIN2	CHCHD6	ANKRD26	MITD1	HDGF	GRPEL2	WDR3	C5orf62	C1orf52	STRA13	DHX35	C4orf43	TRAPPC2	SOD1	TRAF3	DDX19A	TRAF1
GSE41867_NAIVE_VS_DAY30_LCMV_CLONE13_EXHAUSTED_CD8_TCELL_DN	http://www.broadinstitute.org/gsea/msigdb/cards/GSE41867_NAIVE_VS_DAY30_LCMV_CLONE13_EXHAUSTED_CD8_TCELL_DN	Sig511	CCNI	HIVEP3	FBXO4	NSF	NCKAP1L	SVIL	TJP2	CABP4	XRCC1	GRINA	PQLC1	LBH	GSTT2	ATG9A	PLOD2	FAM3C	CALU	KDM5A	DHRS1	BRAF	SETX	GPCPD1	VCPIP1	STK25	HNRNPH3	AAK1	CR1L	C1orf27	E2F2	INPP5K	TRIM35	LPIN2	SERHL2	ATF2	FBXO2	RAPGEF1	AP3M1	ITPR3	C5orf32	N4BP2	SDF2	ENDOU	BOD1L	IL18	PPP2R5B	DERL1	TXNIP
GSE41867_LCMV_ARMSTRONG_VS_CLONE13_DAY6_EFFECTOR_CD8_TCELL_DN	http://www.broadinstitute.org/gsea/msigdb/cards/GSE41867_LCMV_ARMSTRONG_VS_CLONE13_DAY6_EFFECTOR_CD8_TCELL_DN	Sig512	RSL24D1	COX18	CCT2	ETF1	NSUN5	GTPBP5	CSE1L	IRF5	XRCC5	TELO2	RCC1	USP5	RBMX2	CACNA1A	ISY1	MRPL15	IFI35	C18orf19	LLGL1	UBE2F	TRAF1	PEX16	RHBDF1	THUMPD1	NUP85	TPRKB	UBE2CBP	MAGOH	GABARAPL1	C2orf56	PPIE	C20orf4	ZCCHC17	IFRD2	IDI1	PRDX3	MRPS22	CPSF1	HSPD1	OAS3	TRAF3	RHOT2	TXNRD1	STIP1	EIF3J	NEDD8	C3orf38
GSE41867_LCMV_ARMSTRONG_VS_CLONE13_DAY8_EFFECTOR_CD8_TCELL_UP	http://www.broadinstitute.org/gsea/msigdb/cards/GSE41867_LCMV_ARMSTRONG_VS_CLONE13_DAY8_EFFECTOR_CD8_TCELL_UP	Sig513	SELM	TOB1	PSEN1	ST6GALNAC6	VCL	CSNK1E	TRAPPC6A	RRAGD	FAM3C	SLC9A5	MRPL34	MIA3	ERLIN1	TGFBR3	USP38	FOXM1	PPT1	GLA	ACYP1	TMEM50A	PRPF18	CD36	NSA2	STAT4	TP53BP2	ITM2A	FOXO3	DCTN2	KIAA0913	CSAD	UROD	CYHR1	DDB2	UGCG	HIVEP3	DNAJC3	HN1	BRP44	CTSH	C9orf140	TMC6	GPX4	INPP5K	FGD3	SNRK	MNT	WHSC1L1
GSE41867_LCMV_ARMSTRONG_VS_CLONE13_DAY8_EFFECTOR_CD8_TCELL_DN	http://www.broadinstitute.org/gsea/msigdb/cards/GSE41867_LCMV_ARMSTRONG_VS_CLONE13_DAY8_EFFECTOR_CD8_TCELL_DN	Sig514	NCKIPSD	PIGO	RYR1	KPNA1	MOB3A	PPPDE1	AHR	PPPDE2	ADAM19	IRF4	RPRD1B	POLR2I	STRA13	EEF2K	GPX4	ATP6AP2	POLR2C	EPS15	SRF	ANKRD13A	AKR7A2	TSPAN6	SLC12A4	YIF1B	ISCU	POU2F1	GBGT1	RPIA	PPAP2C	ELOVL6	TSTA3	GCOM1	TXLNA	PMP22	CDK2AP2	SLC9A5	OBFC2A	IRF2BP1	KLF9	DNMT3B	DKC1	ATP8B2	ZMYM2	SSFA2	ZNF22	VCL	ETS2
GSE41867_MEMORY_VS_EXHAUSTED_CD8_TCELL_DAY30_LCMV_UP	http://www.broadinstitute.org/gsea/msigdb/cards/GSE41867_MEMORY_VS_EXHAUSTED_CD8_TCELL_DAY30_LCMV_UP	Sig515	ARPP21	CARD6	LEAP2	CSRNP1	GPR65	PLEK	TLR4	RNF31	LTB	PRIC285	GCNT1	HSD11B1	SLITRK6	CD84	KIF9	MAP3K5	SPI1	CSF2	CXCR6	CEBPD	RAB5C	ATP8A2	RNF145	FAM100B	NCEH1	IFIT2	MYCBP2	NOXRED1	C6orf130	CXorf21	DAPP1	CD40	MITD1	ATP10A	VPS54	GBP4	LRRN4	DUSP2	GPR133	FASLG	SOCS1	PGLYRP2	STAT2	FAM26F	RGS17	USP8	MSRB2
GSE41867_MEMORY_VS_EXHAUSTED_CD8_TCELL_DAY30_LCMV_DN	http://www.broadinstitute.org/gsea/msigdb/cards/GSE41867_MEMORY_VS_EXHAUSTED_CD8_TCELL_DAY30_LCMV_DN	Sig516	ERLEC1	IL6R	DNPEP	DHDDS	FAM122A	ATF6	HM13	ZSCAN21	RAI1	ETHE1	UBN1	CGRRF1	UBE2A	TSPAN13	MYLK	LPCAT3	PPP1R15B	OSBP	IL10RB	TMED10	EPCAM	DNASE2	CREB3L2	CLINT1	GSTT1	NDFIP1	MAN2A1	REXO2	CDC42SE2	SPINT2	ST14	TNFRSF17	TMEM165	ACADSB	DSCR6	RAP1A	KRTCAP2	TMEM52	MTOR	PDIA4	TMEM167A	PRRC2A	SPCS1	MRPS14	CRIP1	SRSF9	ECI2
GSE41867_DAY8_EFFECTOR_VS_DAY30_MEMORY_CD8_TCELL_LCMV_ARMSTRONG_DN	http://www.broadinstitute.org/gsea/msigdb/cards/GSE41867_DAY8_EFFECTOR_VS_DAY30_MEMORY_CD8_TCELL_LCMV_ARMSTRONG_DN	Sig517	KIAA0664	NFKBIE	LRRK1	PARD6G	MRPS26	CYP8B1	PLEKHF2	RRAGC	NIT2	HSPE1	MRPL21	METTL21D	TRIM21	MRPL11	DYNC1H1	ST6GALNAC4	MDN1	DUSP2	BCL7A	TFEB	RNF213	FAM111A	TLR6	HERC2	CCR5	LARP7	DIMT1	PRPF3	PANX1	TNP2	ZDHHC13	SPP1	DENR	C19orf40	TATDN3	GTF3A	CFP	ITPR1	REST	DLGAP4	ISOC1	PDSS1	PARP14	C7orf50	RCAN1	FCER1A	NOP10
GSE41867_DAY6_VS_DAY8_LCMV_CLONE13_EFFECTOR_CD8_TCELL_UP	http://www.broadinstitute.org/gsea/msigdb/cards/GSE41867_DAY6_VS_DAY8_LCMV_CLONE13_EFFECTOR_CD8_TCELL_UP	Sig518	C21orf2	CA2	C9orf64	STX11	C9orf152	CDYL2	ZBP1	DNAJB6	COX8A	PDE8A	NCEH1	SLC25A22	CCL4	OAS3	SCLY	ARHGAP33	MAPKBP1	IP6K1	BEND6	CASP9	SH3BGRL	MAF	WDR13	RSPO2	MUSTN1	KIF13B	PAK1	STK40	EPSTI1	UHRF1	STAT2	COA5	ZNF449	TOX2	OAS2	NID1	IL10RA	TEAD1	C14orf166B	TRIM68	HMGA2	LPHN2	IGHMBP2	ACOT8	DHX57	STX2	SLC11A1
GSE41867_DAY6_VS_DAY8_LCMV_CLONE13_EFFECTOR_CD8_TCELL_DN	http://www.broadinstitute.org/gsea/msigdb/cards/GSE41867_DAY6_VS_DAY8_LCMV_CLONE13_EFFECTOR_CD8_TCELL_DN	Sig519	YES1	PRMT5	EML4	ZNF566	ISYNA1	ZNF317	C1GALT1C1	ZHX1	HLX	GALK2	SNAP23	C1orf190	LATS1	CRISP3	DNLZ	DYRK1A	LMO4	OXR1	SLC35B1	UGCG	ZBTB1	HIBCH	NDUFA1	SLC4A1AP	C19orf6	MLL3	NGEF	RPSA	CDK2	ZNF821	TUBB2B	ZNF397	GAN	PDIA6	PTPLA	MALAT1	CTNNAL1	DCUN1D4	MAP3K10	RNF146	C6orf228	MTAP	LIPG	PCMTD2	FMNL3	CECR2	DONSON
GSE41867_DAY6_EFFECTOR_VS_DAY30_EXHAUSTED_CD8_TCELL_LCMV_CLONE13_UP	http://www.broadinstitute.org/gsea/msigdb/cards/GSE41867_DAY6_EFFECTOR_VS_DAY30_EXHAUSTED_CD8_TCELL_LCMV_CLONE13_UP	Sig520	AGR2	DAAM1	COA5	ENPP4	IP6K1	DNAL1	LLGL1	ZNF513	ZBP1	TP53BP1	ADIPOQ	NT5C3	TAPBP	IFT80	GSN	PLSCR3	ITPR1	LPHN2	TSGA10	EPSTI1	BATF2	CSF2	TALDO1	SIAE	SCLY	IFIT1	C9orf64	IFITM3	RAB19	ALOX5AP	C9orf103	IL12A	UHRF1	C19orf12	ZNF23	FRMD4A	SGCB	C1orf54	CCRL2	MAF	SLFN12L	HK1	TOR3A	LGALS3BP	C1orf9	CSF1	SOAT2
GSE41867_DAY6_EFFECTOR_VS_DAY30_EXHAUSTED_CD8_TCELL_LCMV_CLONE13_DN	http://www.broadinstitute.org/gsea/msigdb/cards/GSE41867_DAY6_EFFECTOR_VS_DAY30_EXHAUSTED_CD8_TCELL_LCMV_CLONE13_DN	Sig521	C18orf55	SCRIB	PECR	YES1	RANBP6	OTUD6B	CASK	DPY19L1	LETM1	TMED2	LANCL2	DHODH	MCOLN2	MAPK6	C17orf39	C19orf6	USP16	CSNK1E	MTMR1	WDR75	ZNF566	SH2D4B	GPR171	PPPDE2	SRRD	SLC30A4	USP30	ISYNA1	UBE2K	LRWD1	STT3A	SYNRG	FRMD3	CRYBG3	PGRMC1	SOCS3	LIPT1	EML4	KLHL6	UGCG	ZHX1	JKAMP	ZNF330	SLC16A1	PTPLA	MPP6	SCCPDH
GSE41867_DAY8_EFFECTOR_VS_DAY30_EXHAUSTED_CD8_TCELL_LCMV_CLONE13_UP	http://www.broadinstitute.org/gsea/msigdb/cards/GSE41867_DAY8_EFFECTOR_VS_DAY30_EXHAUSTED_CD8_TCELL_LCMV_CLONE13_UP	Sig522	SPC24	CUTA	PHRF1	LYSMD3	STOML2	MINOS1	POC5	SUV39H1	DMD	WEE1	PRR11	HSPA5	BATF3	CTNNA1	THOC4	CNIH4	GPN3	MORF4L2	NDUFB6	PTPRJ	TACC2	CD5L	SVIL	TRIM25	ABCF1	RAB11A	MRPL42	MED9	PKNOX1	MT1E	NUDCD3	SEC63	WDR13	TNFRSF18	IGHM	SRSF7	ATHL1	CCDC41	EBP	LYAR	CRIM1	MAF	AATF	TSPAN5	TMEM194A	C9orf140	SELK
GSE41867_DAY8_EFFECTOR_VS_DAY30_EXHAUSTED_CD8_TCELL_LCMV_CLONE13_DN	http://www.broadinstitute.org/gsea/msigdb/cards/GSE41867_DAY8_EFFECTOR_VS_DAY30_EXHAUSTED_CD8_TCELL_LCMV_CLONE13_DN	Sig523	MKNK2	GADD45A	FAM101A	PCMTD1	CEP63	SESN1	CHST7	LCLAT1	ACACA	ZBED4	CNST	TMEM108	PIK3IP1	MGA	FLJ27352	DFFB	C14orf43	SPAG9	IL1R2	GABPB2	GPSM3	CTDP1	PACRGL	AIG1	ALDH16A1	MYH9	ASNSD1	EFTUD1	PDCD1LG2	SEMA4D	HDAC11	SUMF1	TMEM57	UCKL1	SDHAF2	USP2	RNF145	VASP	SPATA5L1	MRPL41	RAPGEF4	TUBG2	TFEB	STK17B	MBD4	MAPRE2	VAMP4
GSE41867_LCMV_ARMSTRONG_VS_CLONE13_DAY6_EFFECTOR_CD8_TCELL_UP	http://www.broadinstitute.org/gsea/msigdb/cards/GSE41867_LCMV_ARMSTRONG_VS_CLONE13_DAY6_EFFECTOR_CD8_TCELL_UP	Sig524	PHRF1	PTPN12	MED9	STOML2	CDK1	KDM6B	SLC19A1	PSMB4	EIF2B3	EIF6	SUMO3	TIMM10	CDYL2	PSMB2	WDR83	MLKL	GPN3	H2AFZ	C1orf55	EZH2	PCBP1	PSMD8	PDCD11	PML	IRF7	ITGB1	KIAA0664	MT1E	TIMM8B	AHCYL2	G6PD	CTSL2	ZNF428	ENTPD1	RBM19	B3GNT2	HMOX2	LYAR	WWP1	MRPL40	NLE1	AGRN	PREPL	BATF3	EXOG	PFDN2	MRPS6
GSE41867_NAIVE_VS_DAY6_LCMV_ARMSTRONG_EFFECTOR_CD8_TCELL_UP	http://www.broadinstitute.org/gsea/msigdb/cards/GSE41867_NAIVE_VS_DAY6_LCMV_ARMSTRONG_EFFECTOR_CD8_TCELL_UP	Sig525	GGPS1	KCTD14	GABPA	ERLEC1	SFT2D1	GADD45A	XRCC1	STARD4	MCART6	CCNI	CMPK1	C7orf58	YPEL2	COMMD6	ZNF521	WFIKKN1	DMRTB1	PAX7	DPP8	FGF13	PPM1F	RFX7	TRAPPC8	RPL32	ATXN7L1	TUG1	C19orf33	TBC1D4	PLCD3	MYBPC2	BAZ2B	MGA	TLE1	C19orf52	SLAMF7	ZNF775	LRRC2	ZNF597	IRGQ	SLC30A4	FAM117A	HDAC11	LRIG2	WWC1	ZNF277	DYNLT3	UBR1
GSE41867_NAIVE_VS_DAY6_LCMV_ARMSTRONG_EFFECTOR_CD8_TCELL_DN	http://www.broadinstitute.org/gsea/msigdb/cards/GSE41867_NAIVE_VS_DAY6_LCMV_ARMSTRONG_EFFECTOR_CD8_TCELL_DN	Sig526	RAB8B	SKAP1	GNGT2	GKAP1	R3HDM1	CLDN23	GPR97	F2R	LACC1	ART3	INTS2	ELOVL5	ITGAE	IL7R	NCSTN	ATM	S100A4	ENDOD1	BCL2A1	PTPLAD1	FAM53C	LOC550643	RNFT1	SMAD3	DAPK2	TPST2	OAS1	TBX21	SEMA4A	ADCK4	FAM195A	SLC23A2	PPAN	FAM82A2	LPCAT2	CCBP2	PCMTD1	RGS3	NELF	NFAT5	TRAP1	FASLG	MEF2A	ETFB	EARS2	CDH17	C6orf26
GSE41867_NAIVE_VS_DAY8_LCMV_ARMSTRONG_EFFECTOR_CD8_TCELL_UP	http://www.broadinstitute.org/gsea/msigdb/cards/GSE41867_NAIVE_VS_DAY8_LCMV_ARMSTRONG_EFFECTOR_CD8_TCELL_UP	Sig527	PCSK1N	PRSS16	TOMM70A	TCEANC2	MRPS23	HNRNPA2B1	UBE2H	JMJD4	LATS1	FGFR1OP	CD9	PDCD10	NDUFS5	ZNF708	FANCC	GRIP2	CUTC	ADAM33	HEXB	BZRAP1	C7orf45	RBFOX2	ZFP36L1	PRAP1	ARL6IP6	SERPINB7	CYP21A1P	AP3S2	RAPGEF3	SARNP	TCF4	MFF	VPREB3	RDH11	STAT2	WTAP	CSRP2	BET1	PLA2G2C	AKAP7	MID1IP1	CCDC130	LETM2	HIST3H2A	BCL6	FGF4	SLC35E3
GSE41867_NAIVE_VS_DAY8_LCMV_ARMSTRONG_EFFECTOR_CD8_TCELL_DN	http://www.broadinstitute.org/gsea/msigdb/cards/GSE41867_NAIVE_VS_DAY8_LCMV_ARMSTRONG_EFFECTOR_CD8_TCELL_DN	Sig528	AIF1L	PCIF1	FGD6	ENDOU	ANKS1A	HSD17B1	SPSB3	SLC29A4	ATXN7L1	N4BP3	FAM189B	CNIH2	ARL4A	CHMP5	C10orf137	SNX14	HDAC5	CAPNS1	RREB1	ZFP106	IL11RA	KLHL15	IFT172	MGA	SETX	CHIC2	ACBD3	ILDR1	BRD9	TRIM68	MED12	ARID3B	TCF12	STAMBPL1	INO80D	RNF111	SUB1	ITGB2	EIF5	PIP4K2A	RAB3A	MS4A7	CTNS	KPNA1	CCDC62	LRSAM1	NACC2
GSE41867_NAIVE_VS_DAY15_LCMV_ARMSTRONG_EFFECTOR_CD8_TCELL_UP	http://www.broadinstitute.org/gsea/msigdb/cards/GSE41867_NAIVE_VS_DAY15_LCMV_ARMSTRONG_EFFECTOR_CD8_TCELL_UP	Sig529	CPNE2	HSD3B7	CTC1	APPBP2	CLEC11A	GABPA	GSTCD	MAT2A	PTCD2	C19orf56	GALNT7	POLK	DPP9	ZNF566	IGF2R	RPRD1B	ATP5G2	SF3A2	COPE	ELOVL6	DNAJC9	TNPO2	PTBP1	UBXN4	FAM64A	NQO1	PEX3	PDCD6	SF3B3	MIB1	PUS3	LRP8	TRMU	WWP1	EXOSC5	ABCC4	NAA30	SUMF2	C11orf54	GLCE	SDHC	WDR73	C4orf32	ASRGL1	RSPRY1	NCOA4	TAP2
GSE41867_NAIVE_VS_DAY15_LCMV_ARMSTRONG_EFFECTOR_CD8_TCELL_DN	http://www.broadinstitute.org/gsea/msigdb/cards/GSE41867_NAIVE_VS_DAY15_LCMV_ARMSTRONG_EFFECTOR_CD8_TCELL_DN	Sig530	BSDC1	ANKS1A	SETD1A	ZBTB43	RNF113A	FRS2	PHRF1	CASS4	SETX	SLC3A2	KIT	AKAP7	INPP5E	GPR132	TECPR1	DMD	CNPY3	SSFA2	HERC1	PDE2A	FAM204A	FAM76B	RPL37A	EXD2	TNFRSF1B	GEM	AFTPH	MNT	CPT1A	ZNF691	APOE	HNRPDL	CPNE6	ATHL1	ANKS3	PPP1R37	ITCH	TMEM31	SLC26A2	FAM189B	CAMK4	FAM120AOS	FOXJ2	SRGN	HERC4	C17orf50	LDLRAD3
GSE41867_NAIVE_VS_DAY30_LCMV_ARMSTRONG_MEMORY_CD8_TCELL_UP	http://www.broadinstitute.org/gsea/msigdb/cards/GSE41867_NAIVE_VS_DAY30_LCMV_ARMSTRONG_MEMORY_CD8_TCELL_UP	Sig531	TRAPPC1	SEPW1	SAP18	BTD	CDC123	ZMAT3	ZNF239	GABPA	DPY30	TNFSF9	REN	HINT1	FANCL	RPS19BP1	GNB4	SMCR7	TUBD1	GLT8D1	TIMMDC1	CASP6	NDUFA7	COPB2	STT3A	ALAD	HINT3	ADH5	JAGN1	WASH1	LAMTOR1	IFT27	CERS6	SMEK2	CEP76	ZNF574	UMPS	CUEDC2	DTNBP1	EIF2B5	UTP23	NUP107	TIMM23	ZNF141	TCEA1	RBM44	CKAP5	ARF5	ESD
GSE41867_NAIVE_VS_DAY30_LCMV_ARMSTRONG_MEMORY_CD8_TCELL_DN	http://www.broadinstitute.org/gsea/msigdb/cards/GSE41867_NAIVE_VS_DAY30_LCMV_ARMSTRONG_MEMORY_CD8_TCELL_DN	Sig532	DENND4C	SCYL1	CCDC51	POM121	PTBP1	REPIN1	TXN	PCYT1A	METTL21D	HAUS7	KRI1	PCMT1	MAGOH	SHQ1	THAP4	FASTKD2	C8orf59	MRPS23	GEMIN8	CTNNAL1	TPRN	C2orf43	MMGT1	ICT1	C7orf55	DPP3	NPLOC4	NTPCR	PPIA	ZWILCH	GAN	C5orf30	AKR1B1	PRDX6	CLPX	DDX47	EIF4H	AGK	HDGF	SEC23IP	SGSM3	CDC34	PTPN12	LYRM1	DHRS13	PGM3	HAX1
GSE41867_NAIVE_VS_DAY8_LCMV_CLONE13_EFFECTOR_CD8_TCELL_UP	http://www.broadinstitute.org/gsea/msigdb/cards/GSE41867_NAIVE_VS_DAY8_LCMV_CLONE13_EFFECTOR_CD8_TCELL_UP	Sig533	ZCCHC11	ARID1A	FERMT3	GALNT2	SCLY	BTD	FBXO33	TK2	NT5C3	ZNF710	ABHD2	SCD	PLEKHA2	OSTC	CHMP5	EIF3E	C20orf54	NFIA	ARHGEF1	TAP2	HDAC5	WDYHV1	CYBASC3	ZNF23	SLAIN1	ABCD1	ERP29	PCMTD1	SNX14	TAX1BP1	CSNK1G3	SERINC3	EIF2B2	SFMBT2	KRTAP12-2	MXD1	HMP19	ARSK	SOAT2	EPOR	IL18	NUB1	PSRC1	RAP1A	SUSD1	KIDINS220	CCM2
GSE41867_NAIVE_VS_DAY8_LCMV_CLONE13_EFFECTOR_CD8_TCELL_DN	http://www.broadinstitute.org/gsea/msigdb/cards/GSE41867_NAIVE_VS_DAY8_LCMV_CLONE13_EFFECTOR_CD8_TCELL_DN	Sig534	B3GNT9	FAM46C	PRL	HBD	LARP1B	CXorf26	DPP3	HPSE	TRAF3IP3	LRP1	LOC643837	AFG3L1P	KRTAP9-8	CHMP4B	LOC145837	STOML3	IGF2R	SPOP	CTDSP1	SPTB	SLC34A2	KCNA1	ZDHHC17	PLEKHA8	ARID3B	DKK4	A1CF	SCAP	SCML1	PPP2R3B	C3orf55	ARHGAP17	LOC100294350	HMGB2	MAP2K5	DIEXF	LOC144481	C5orf47	EXOC1	SNX20	CLASP1	LOC253039	TIA1	SLC25A38	TBC1D24	MOGS	PPP2R2A
GSE41867_NAIVE_VS_DAY15_LCMV_CONE13_EFFECTOR_CD8_TCELL_UP	http://www.broadinstitute.org/gsea/msigdb/cards/GSE41867_NAIVE_VS_DAY15_LCMV_CONE13_EFFECTOR_CD8_TCELL_UP	Sig535	SLC38A3	LOC100129726	PDZRN3	HSD3B1	MLPH	A4GALT	HACE1	USP43	HCN1	FMR1NB	GPR37	PLCD4	TNF	PIRT	VN1R106P	LOC284630	MGC4473	ABCC2	LOC100294362	CDC14C	RSPH9	SPATA6	IMPG1	TNNC2	GEMIN4	SPDYE1	MGC16703	PITX2	PARD6G	CXorf51A	OSM	C14orf184	RECK	LOC494558	PYGO1	LOC646168	ELAVL4	DUXAP10	MACROD1	SELE	LRRC32	NT5E	DLG5	TTC38	GPR112	C1orf127	GPR35
GSE41867_NAIVE_VS_DAY15_LCMV_CONE13_EFFECTOR_CD8_TCELL_DN	http://www.broadinstitute.org/gsea/msigdb/cards/GSE41867_NAIVE_VS_DAY15_LCMV_CONE13_EFFECTOR_CD8_TCELL_DN	Sig536	UBXN1	MAK16	PABPC4	PIGK	CDC23	ZNF18	PIN1	MAGED1	CTTNBP2	DKK4	HAUS3	C16orf80	ENC1	AKAP17A	OSBPL8	USP4	CRNKL1	CAMSAP1	PSME4	CCDC104	ZNF438	LCLAT1	C16orf72	FBXO32	LARS	ASRGL1	CRKL	AP4E1	LRFN1	KRTAP9-8	CHD1	MCFD2	PRDX4	JAM3	TBC1D23	ACOT4	SERPINA10	MAP3K15	NUDT12	KCTD18	CPSF2	PRIM2	SOX3	KLHL34	FAM73B	SREK1	RPE
GSE41867_NAIVE_VS_DAY30_LCMV_CLONE13_EXHAUSTED_CD8_TCELL_UP	http://www.broadinstitute.org/gsea/msigdb/cards/GSE41867_NAIVE_VS_DAY30_LCMV_CLONE13_EXHAUSTED_CD8_TCELL_UP	Sig537	CELA1	IFIH1	LOC100131311	PVRL3	LOC100131541	SPATA6	C14orf182	TENC1	C3orf38	FUT4	ZNFX1	EGFLAM	KRT17	BLVRA	WDR63	TSIX	NAMPT	PIM3	STAT5A	LOC100287109	GRHL1	UBE2L6	RAB24	ADORA2A	EGFL7	VN1R106P	IL18R1	SPAG1	OAS3	FBP2	TYSND1	PLEK	DDX60L	NPY1R	DNAAF1	KCNJ2	ANKLE2	DUSP5	SLC1A3	CDKN2B	HERC5	RBMXL1	PRG3	SLC1A2	XRN1	ABCC2	TNIP2
GSE41867_LCMV_ARMSTRONG_VS_CLONE13_DAY15_EFFECTOR_CD8_TCELL_DN	http://www.broadinstitute.org/gsea/msigdb/cards/GSE41867_LCMV_ARMSTRONG_VS_CLONE13_DAY15_EFFECTOR_CD8_TCELL_DN	Sig538	MIB2	PLEKHM3	SCML1	KRTAP9-8	CBLN4	LOC283547	ADAMTS3	DNAI2	CGN	LOC100130837	SOX3	CCNG2	MPZL2	KCNMB2	KIF26A	SMO	LOC440981	PLXDC1	ST6GALNAC5	LOC100289090	C17orf70	LOC780529	LOC100289049	C17orf39	ZNF510	MIER3	DPCR1	LHX9	RASD2	ABCA17P	LOC100129858	CYP2A6	LINC00112	LOC283658	CSGALNACT2	INGX	MTHFR	SCIN	DRD5	SLC45A3	GULP1	TAF1C	ARSK	SERPINB5	ATP6AP1L	C15orf33	C10orf54
GSE41867_DAY6_VS_DAY15_LCMV_CLONE13_EFFECTOR_CD8_TCELL_UP	http://www.broadinstitute.org/gsea/msigdb/cards/GSE41867_DAY6_VS_DAY15_LCMV_CLONE13_EFFECTOR_CD8_TCELL_UP	Sig539	ZNF800	RDH16	PALM	TXK	CYP11B1	HSD3B1	FKSG29	SLC13A2	CLDN8	CXCL11	NPY1R	ABCC2	CST1	INHBC	IMPG1	LOC149703	GEM	AVPR2	KRT80	IDO2	PDZRN3	GPM6B	CDT1	ATCAY	CLTCL1	TAS1R1	RERG	AGBL4	DCDC2	SELP	STK32B	MEGF6	GRB7	C15orf32	C9orf11	IL22	RSPH10B2	LOC100133089	IL4	LOC100134368	AQP10	SCAMP5	REN	PRKCZ	KIAA1875	SCGB2A1	LOC100130155
GSE41867_DAY6_VS_DAY15_LCMV_CLONE13_EFFECTOR_CD8_TCELL_DN	http://www.broadinstitute.org/gsea/msigdb/cards/GSE41867_DAY6_VS_DAY15_LCMV_CLONE13_EFFECTOR_CD8_TCELL_DN	Sig540	EOMES	FXN	LRFN1	COL4A1	RCAN1	ASB16	MAK	SH3BGRL2	LRWD1	TCP10	FLJ43390	LETM2	POU5F2	PYCR1	TMEM105	KDM2A	CPT1C	CSRNP2	DVL1	GULP1	CGN	LOC100505518	PAR5	SNX15	CA7	PER4	MYPOP	FITM1	WBSCR27	IGFBP3	LRRC4C	SLC22A23	LOC100129166	SERPINA10	EPOR	AGBL5	CLDN10	PCDHGA8	WNK4	MEF2D	NUPR1	C3orf65	SCYL3	SCN11A	KRTAP5-2	ZNF443	TUBGCP5
GSE41867_DAY6_VS_DAY15_LCMV_ARMSTRONG_EFFECTOR_CD8_TCELL_DN	http://www.broadinstitute.org/gsea/msigdb/cards/GSE41867_DAY6_VS_DAY15_LCMV_ARMSTRONG_EFFECTOR_CD8_TCELL_DN	Sig541	PTTG1	C10orf76	POU4F2	WNK1	GOPC	TWF1	SLC33A1	MPV17	NR1H2	XBP1	UBE2I	ZMYND8	CD69	N6AMT2	TSN	KLK13	PLA2G2A	CCT4	PPM1B	FBXO28	DDX56	CUEDC2	STX2	SLC2A1	PRPF3	SGCD	RAB8A	ATF7IP2	CADM1	TMEM212	BABAM1	UNC5CL	RSPH9	UBA5	C11orf24	OPA3	GNA15	HSP90B1	RAP2B	PPIG	LOC400622	CDK4	BTBD10	PEPD	MIR143HG	LOC400027	AHNAK
GSE41867_DAY8_VS_DAY15_LCMV_ARMSTRONG_EFFECTOR_CD8_TCELL_UP	http://www.broadinstitute.org/gsea/msigdb/cards/GSE41867_DAY8_VS_DAY15_LCMV_ARMSTRONG_EFFECTOR_CD8_TCELL_UP	Sig542	C8orf44	KRTAP9-8	SYT9	FBXL19-AS1	MYL4	LOC100507424	PHGDH	PHF21B	TMEM132B	CCDC116	BAI3	GPR37	SSPN	CCBP2	ITM2C	ZSCAN20	CHADL	GRIN2B	GOLGA6L2	LZTS1	ZNF70	DZANK1	RNF207	OR10J1	TTC21B	VEPH1	TGFBRAP1	F2R	LGI2	MIR137HG	GAP43	LOC286370	LOC284889	MUC17	PLXDC1	TPTE2P6	LYPD6B	CEP152	LINC00173	RNFT2	LOC283435	MIOX	MAPK11	SMAGP	CLCA1	MLPH	IL23A
GSE41867_DAY8_VS_DAY15_LCMV_ARMSTRONG_EFFECTOR_CD8_TCELL_DN	http://www.broadinstitute.org/gsea/msigdb/cards/GSE41867_DAY8_VS_DAY15_LCMV_ARMSTRONG_EFFECTOR_CD8_TCELL_DN	Sig543	FAM71F2	KCNA1	ZIC5	LOC100128840	RNF217	POU4F1	ABCC2	TAC4	LOC100294350	AHCTF1	IMPG1	CST1	ABCA3	SLC25A2	PDK3	LOC100287602	L1CAM	SMC5	ACTR3C	CDH18	SYT7	FGF5	CCDC144B	AP1AR	IDO2	STRC	FLJ36848	C15orf32	ANKRD17	ENTPD3	SPACA3	LOC100287584	CREB3L1	CUBN	LOC100134368	CRIPAK	C4orf10	DIRC3	B4GALNT1	APLN	LOC283404	HIST1H3A	C10orf113	DYDC1	FAM47B	ICAM5	PPFIA4
GSE41867_DAY6_VS_DAY15_LCMV_ARMSTRONG_EFFECTOR_CD8_TCELL_UP	http://www.broadinstitute.org/gsea/msigdb/cards/GSE41867_DAY6_VS_DAY15_LCMV_ARMSTRONG_EFFECTOR_CD8_TCELL_UP	Sig544	CPNE8	SLC6A15	HERC5	KRTAP9-8	CPLX1	LOC256021	CELA1	GJB2	TTYH2	DUSP1	PRKD1	ANKRD33B	C9orf91	CCNA1	ADAM18	GJA1	BAMBI	ZC3HAV1	LIFR	FAM9B	PLAGL2	PSG5	DHX58	GUCY1A3	HOXD10	RASGRP1	FBXL19-AS1	MST4	ZBP1	PAPD7	IRF1	MARCKS	GBP5	RASGEF1B	OASL	DDX60L	PTGS2	ADORA2A	MAP3K8	IFNB1	OXTR	PI4K2B	RNF213	LOC780529	KLC3	TRIP10	MIR155HG
GSE41867_DAY15_EFFECTOR_VS_DAY30_MEMORY_CD8_TCELL_LCMV_ARMSTRONG_DN	http://www.broadinstitute.org/gsea/msigdb/cards/GSE41867_DAY15_EFFECTOR_VS_DAY30_MEMORY_CD8_TCELL_LCMV_ARMSTRONG_DN	Sig545	CAMSAP1	CCDC144B	SHARPIN	MTM1	LOC284009	NUDT12	USP4	STC2	GSTA4	EXOSC2	HES2	GRM2	STX6	ZNF18	DOCK7	NR4A3	UBAP2	ZMYM2	FBXL6	SNORA71A	HAUS6	RHOT1	SNX21	HERC2	AKAP17A	GSG1L	LOC727818	PWWP2B	FIGF	ZNF514	STAMBPL1	CCDC77	CENPL	ZFP30	TLR1	ZBTB34	PTPN22	NR2F6	ZFYVE16	TMEM132B	NPY1R	CSNK1G3	CCDC14	ATG2B	ABCC2	LOC283357	SPATA3
GSE41867_LCMV_ARMSTRONG_VS_CLONE13_DAY15_EFFECTOR_CD8_TCELL_UP	http://www.broadinstitute.org/gsea/msigdb/cards/GSE41867_LCMV_ARMSTRONG_VS_CLONE13_DAY15_EFFECTOR_CD8_TCELL_UP	Sig546	UBA6	C12orf62	SLC16A14	FBXL19	TFEC	PTPN6	ACVR1B	TXN	APOE	BCORL1	TRIM13	PPM1B	USP47	IL4I1	ING2	SEC22B	STARD6	FAM133B	PRKCD	GMFG	CS	UQCR11	HRH1	HOOK3	HDC	TSC22D1	HLA-DQA1	CORO7	SLC12A6	GPR75	TTI1	GPI	MAP3K5	PSMB4	ZNF799	PSMD5	PTPN1	MAN1A1	UQCRB	ZNF217	DOCK5	C6orf64	C9orf103	WDR74	CALHM2	IER2	MEOX1
GSE41867_DAY15_EFFECTOR_VS_DAY30_MEMORY_CD8_TCELL_LCMV_ARMSTRONG_UP	http://www.broadinstitute.org/gsea/msigdb/cards/GSE41867_DAY15_EFFECTOR_VS_DAY30_MEMORY_CD8_TCELL_LCMV_ARMSTRONG_UP	Sig547	C11orf63	C9orf68	TMEM121	RCBTB1	LONRF3	SRSF11	TRAF3	FNIP2	ZMIZ1	RGL1	RAI2	ANKRD12	SCAF4	JUB	RARRES1	KCNK4	MDM2	ZFP36L2	MNAT1	GNL2	SH3RF1	LOXL2	PDE2A	MYO16	ZNF131	NR2E1	SLC38A3	JHDM1D	ABHD1	ABHD5	ALDH3A1	TMEM189	FAM110B	LAMTOR3	NAF1	C20orf111	SLAMF8	BMP7	ZNF541	DCST1	SPHK1	ZDHHC18	SAMD8	SIRT2	GRAMD3	SLC2A9	GNL3
GSE41978_WT_VS_ID2_KO_AND_BIM_KO_KLRG1_LOW_EFFECTOR_CD8_TCELL_DN	http://www.broadinstitute.org/gsea/msigdb/cards/GSE41978_WT_VS_ID2_KO_AND_BIM_KO_KLRG1_LOW_EFFECTOR_CD8_TCELL_DN	Sig548	SLC8A3	GALNT3	CTNNA2	MFAP1	SLC25A35	HMGB3	TUBGCP4	SEMA4A	ELF2	BCL7C	LMNA	IL1B	NNMT	ABCA1	WNT10B	PTPRJ	KLRK1	ECHS1	PCDHB2	APOOL	PDPN	DSCAM	SNX12	CEP89	DNAL4	CLEC4E	NRCAM	MECP2	CD2BP2	RGS7	PROZ	NECAB3	HMP19	PCBP3	PLK4	FUT7	STMN1	PDCD1	TBC1D17	FTH1	MAD2L1	GHRHR	CSRP1	ZNF124	PHF20L1	RGS6	XIAP
GSE41978_WT_VS_ID2_KO_KLRG1_LOW_EFFECTOR_CD8_TCELL_DN	http://www.broadinstitute.org/gsea/msigdb/cards/GSE41978_WT_VS_ID2_KO_KLRG1_LOW_EFFECTOR_CD8_TCELL_DN	Sig549	POLR3K	CNOT7	GCNT2	TMPRSS11D	P2RX4	SRGN	EN2	ARHGAP17	PIM1	MTMR3	STARD13	XPNPEP1	IL4R	GSPT2	NDUFS4	CYP4A22	ITGA4	STRA6	HIC1	TGM1	AKT3	PCOLCE2	SNHG6	CAMKK1	RAB3B	NMUR1	PIWIL2	CHST14	WNK1	KMO	PDE3A	CDHR1	HK2	CRISPLD1	DHRS3	SMAD3	RAI14	TRIP12	LGALSL	PCDHB5	CFLAR	SH3RF1	HECTD1	NID2	ARL4A	ZNF707	THBS4
GSE41978_WT_VS_ID2_KO_AND_BIM_KO_KLRG1_LOW_EFFECTOR_CD8_TCELL_UP	http://www.broadinstitute.org/gsea/msigdb/cards/GSE41978_WT_VS_ID2_KO_AND_BIM_KO_KLRG1_LOW_EFFECTOR_CD8_TCELL_UP	Sig550	NNMT	CNR2	HAUS5	FUT7	ELOVL2	RAB23	ST6GALNAC1	EME1	SIT1	GDF5	SAA1	CUL4B	TTLL1	RRAD	MUTED	CLEC4E	FBXO18	SNRK	NME3	XIAP	LAMB1	SLC17A6	MMP7	C1orf159	MUTYH	SNTB1	C6orf108	CRIP2	IRF1	NCF2	LRRC2	STMN1	HMP19	DIO2	C11orf67	KLHDC5	ATP6V1C2	MINA	AGBL3	SLC4A5	NEIL3	GMFB	MRPS15	CPSF7	PDLIM5	CEP70	NBEA
GSE41978_KLRG1_HIGH_VS_LOW_EFFECTOR_CD8_TCELL_UP	http://www.broadinstitute.org/gsea/msigdb/cards/GSE41978_KLRG1_HIGH_VS_LOW_EFFECTOR_CD8_TCELL_UP	Sig551	MAPKAPK2	GRID2IP	TAL1	SNHG11	GCNT2	P2RX4	KRT20	SAV1	PPP3CC	KSR1	FBN1	LHB	ALDH1A3	MFAP5	CA4	PON1	GJC1	CCNA1	RNF41	ALLC	EEF1A2	BCR	RUVBL2	CAMKK1	CCDC115	MT4	ACBD3	ADRB3	ADCK1	FHL3	C9orf114	DTX1	RHBDF1	SPECC1	MFHAS1	TMPRSS5	ADAMTS1	CFTR	CANX	ABCG5	ZFP37	EPB41L4A	C1S	BICC1	PPP1R42	PIM1	SART3
GSE41978_KLRG1_HIGH_VS_LOW_EFFECTOR_CD8_TCELL_DN	http://www.broadinstitute.org/gsea/msigdb/cards/GSE41978_KLRG1_HIGH_VS_LOW_EFFECTOR_CD8_TCELL_DN	Sig552	EIF4H	TOR1AIP1	TNFAIP6	SLFN12L	RPS15A	GDF5	SLC8A3	INCENP	RPS6KB1	RPS26	FSCN3	CAP1	CHRNA5	PAPOLG	UQCR11	FBXO43	CHCHD2	MCM6	ASB16	PHF20L1	SLC25A6	RPLP0	CENPM	RPL18	EEF1G	SYNJ2BP	MRPS15	RPS29	RPS14	PBX1	RPL6	RPL12	NNMT	EIF3A	CFP	THBS3	RPS4X	NLGN1	FEM1B	SCAMP3	ZPBP	PSMB8	RPL27	LTBP4	HMGB1	DDX5	ASF1B
GSE41978_WT_VS_ID2_KO_KLRG1_LOW_EFFECTOR_CD8_TCELL_UP	http://www.broadinstitute.org/gsea/msigdb/cards/GSE41978_WT_VS_ID2_KO_KLRG1_LOW_EFFECTOR_CD8_TCELL_UP	Sig553	ASB15	TMPRSS11D	TENC1	CACNG4	LHB	PLA2G12A	PTPLA	SLTM	C1S	GDI1	CFB	ACBD3	HSPB7	BTC	ZBTB12	FBN1	PCDHB2	FOLR2	KSR1	GRID2IP	KIAA0319L	SEMA4G	PCDHB11	MUC1	RBPMS2	CDK18	SLC22A17	ESPN	THBS4	KRT20	RAP2B	FAM110C	BUD13	HEBP1	PLSCR3	UGT8	PCTP	ANGPTL1	ZMAT2	RAI2	BVES	GSPT2	CXADR	LAMA2	STX3	FZD2	TTC7B
GSE41978_WT_VS_BIM_KO_KLRG1_LOW_EFFECTOR_CD8_TCELL_DN	http://www.broadinstitute.org/gsea/msigdb/cards/GSE41978_WT_VS_BIM_KO_KLRG1_LOW_EFFECTOR_CD8_TCELL_DN	Sig554	POLR3K	LMNB2	APAF1	LAMB1	HIC1	ZFP92	TMEM14C	LHX1	ITPKB	SPATA4	P2RX4	P2RX7	IFT57	PDHA2	LAMP1	BCL2L10	NME4	ERMP1	CHAD	TRIO	DUSP14	GNB5	SLC9B2	AGBL3	GOSR2	GSPT2	ALG9	PAFAH2	GNG12	KIAA1429	GZMA	STAG1	MBTPS1	FCER1A	CD8A	ALDH1A2	NDNL2	ZDHHC3	MAGIX	ATOX1	MUTED	KIN	FBXO18	SORCS2	UQCR11	NID2	DAPK3
GSE41978_ID2_KO_VS_ID2_KO_AND_BIM_KO_KLRG1_LOW_EFFECTOR_CD8_TCELL_UP	http://www.broadinstitute.org/gsea/msigdb/cards/GSE41978_ID2_KO_VS_ID2_KO_AND_BIM_KO_KLRG1_LOW_EFFECTOR_CD8_TCELL_UP	Sig555	LMNA	PPT1	ITGAE	HCK	MYH14	AADAC	TTR	UGGT2	GABRA2	CD44	HAL	TC2N	CER1	PPAP2B	NOTCH1	MUC15	PDPN	FGA	AXL	PLCD1	INMT	PROZ	RERG	NUPL2	IL1F10	MIA	PNCK	CBLL1	HYAL3	PLXNC1	MST1R	CCNA1	ENPP3	BATF3	GHRHR	MLH3	LRRC20	CLMN	VSX2	ST5	TRIP10	SLC15A1	BTK	TMEM106C	CDHR5	SEMA4A	NAP1L5
GSE41978_ID2_KO_VS_ID2_KO_AND_BIM_KO_KLRG1_LOW_EFFECTOR_CD8_TCELL_DN	http://www.broadinstitute.org/gsea/msigdb/cards/GSE41978_ID2_KO_VS_ID2_KO_AND_BIM_KO_KLRG1_LOW_EFFECTOR_CD8_TCELL_DN	Sig556	FAU	GMEB1	CFL1	PKM2	POLR3K	PPP1CC	MIF	RPL23	SRP19	UBC	GZMA	ATOX1	COX7A2	SEC61A1	ATP5J2	ARF1	KIAA0100	CPSF3	LMNB2	TUBB	SRGN	EEF2	WNK1	STRA6	P2RX4	UBAC2	SRSF5	SON	CORO1A	GABPA	YBX1	RNF187	ATP5F1	UQCR11	RPA1	PIM1	GOSR2	RIPK4	AKT3	RPL24	RPS3	GOT2	ALG9	RPS5	ENO1	COX17	LDHA
GSE41978_WT_VS_BIM_KO_KLRG1_LOW_EFFECTOR_CD8_TCELL_UP	http://www.broadinstitute.org/gsea/msigdb/cards/GSE41978_WT_VS_BIM_KO_KLRG1_LOW_EFFECTOR_CD8_TCELL_UP	Sig557	PTPLA	FCRLA	CTNNA2	PDPN	NLRP6	CAMK1G	PTGR1	UGGT2	GLRX2	SVEP1	LDB3	C22orf23	STK32B	APOF	CDHR5	CHEK2	IL1B	F2	FAM110C	MYH14	XRCC1	LMNA	CD34	KRT34	AXL	ECHS1	ZCCHC3	HCN2	NFATC2IP	UGT2B4	MOSPD2	FAM53C	C10orf27	TMEM106C	TRIP10	ATP1A2	GPRC5C	RHEBL1	SLC35A5	VMP1	XIRP1	NUPL2	VSX2	TET1	SLC12A9	CIDEC	CPXM2
GSE41978_ID2_KO_VS_BIM_KO_KLRG1_LOW_EFFECTOR_CD8_TCELL_DN	http://www.broadinstitute.org/gsea/msigdb/cards/GSE41978_ID2_KO_VS_BIM_KO_KLRG1_LOW_EFFECTOR_CD8_TCELL_DN	Sig558	SNHG11	TNFAIP6	SEC61A1	DCAF4	BCL2L15	NEFH	RBM39	ARF6	CHRNA7	ADAMTS8	GJD2	C2orf40	GABRA2	ATP2B2	EAF2	FSCN3	SMC5	CCNA1	FXR1	CANX	CST6	SRPK3	FOXO4	C2orf42	LHCGR	SFRP5	PC	USP8	HDLBP	BICD2	NTNG1	ALX3	TC2N	CDH8	ZNF287	RDX	USP43	DDX4	PRKD1	LSM1	ADRA2A	PPIB	ABP1	DNMBP	SH2B2	KLK11	CCDC59
GSE41978_ID2_KO_AND_BIM_KO_VS_BIM_KO_KLRG1_LOW_EFFECTOR_CD8_TCELL_UP	http://www.broadinstitute.org/gsea/msigdb/cards/GSE41978_ID2_KO_AND_BIM_KO_VS_BIM_KO_KLRG1_LOW_EFFECTOR_CD8_TCELL_UP	Sig559	CLEC6A	MTMR10	GRIN2C	CHAD	HBE1	RHEBL1	HOXA9	SKAP2	CHST1	TBX15	SLTM	POU4F3	ELF4	ERMP1	THTPA	CASP8AP2	FN1	ZIK1	PRUNE	CTSF	EPS8L1	CLEC4E	C10orf46	AKAP2	FA2H	ODZ3	BUD13	APIP	RNF25	CYP19A1	SALL3	PTGER1	GJC2	FUT7	ATP8A1	MCM9	FAM92A1	RAB33B	S100G	DRAM1	ZDHHC3	DPM2	FBLN1	ADI1	NTF3	PTPRG	DCX
GSE41978_ID2_KO_AND_BIM_KO_VS_BIM_KO_KLRG1_LOW_EFFECTOR_CD8_TCELL_DN	http://www.broadinstitute.org/gsea/msigdb/cards/GSE41978_ID2_KO_AND_BIM_KO_VS_BIM_KO_KLRG1_LOW_EFFECTOR_CD8_TCELL_DN	Sig560	CELP	PALLD	EPAS1	AMIGO2	PPP1R3C	GPRC5A	TPSG1	DNMBP	CGRRF1	NACC2	EIF2C2	C1orf106	RBM15	AUTS2	TUFT1	ANKRD28	GPR56	CCS	C11orf68	ZNF323	SIPA1L3	MYBL1	PFKFB3	MEOX1	RGR	SNX13	TFAP2C	INPP5A	FOXO3	GRB10	MUC4	PLAU	DPY19L1P1	FBXW11	NUAK1	TRAK2	CADM4	SDC4	CROT	MAVS	PDE8A	CERK	EXTL1	KCNF1	IRS2	PDZD8	VPS72
GSE41978_ID2_KO_VS_BIM_KO_KLRG1_LOW_EFFECTOR_CD8_TCELL_UP	http://www.broadinstitute.org/gsea/msigdb/cards/GSE41978_ID2_KO_VS_BIM_KO_KLRG1_LOW_EFFECTOR_CD8_TCELL_UP	Sig561	PSMB10	PSME2	CREM	OAS3	DRAM1	SEPX1	PARP12	SP110	IL1R1	IFI30	PLSCR1	HLA-E	IL32	TAP2	CTSL1	ISG15	APOL2	IFIT1	LAP3	IDO1	TRIM21	CD47	GBP2	CXCL5	NBN	RPA2	BATF3	PSMB8	SNRPF	STAT1	SQRDL	IGFLR1	IFI35	GBP1	MYD88	MAFF	UBE2L6	CCL2	IFIT5	STAT3	CASP7	PLSCR4	HLA-B	SOD2	TRAFD1	CFH	TAP1
GSE44649_NAIVE_VS_ACTIVATED_CD8_TCELL_UP	http://www.broadinstitute.org/gsea/msigdb/cards/GSE44649_NAIVE_VS_ACTIVATED_CD8_TCELL_UP	Sig562	TBXA2R	TRAF3IP2	IGFBP1	HINT1	ORMDL3	FAM127C	ZBTB12	MT3	PEX6	VARS	LYSMD1	PLD4	FAM101B	POLR2G	RPL3	TIRAP	MRPL2	MRPL40	HSBP1	HPCAL1	ANAPC2	PAFAH2	DNAJC10	ACSS1	PCSK5	C2orf43	SIRT3	PI4K2A	MPL	C20orf30	STXBP2	ANAPC1	TK1	TGDS	STK38	ERCC4	XPNPEP1	AUP1	RNF167	TMEM71	PTGIR	MYL12B	IL10RA	POLD4	IL12RB1	AKR1A1	SEC61B
GSE44649_NAIVE_VS_ACTIVATED_CD8_TCELL_MIR155_KO_UP	http://www.broadinstitute.org/gsea/msigdb/cards/GSE44649_NAIVE_VS_ACTIVATED_CD8_TCELL_MIR155_KO_UP	Sig563	TUG1	TIMM8A	WBP5	TOR1AIP2	IMP4	CLOCK	SH2B3	BYSL	RBM4B	FUBP1	STK36	PARP2	TAB3	RNF4	NUP50	ZRSR2	TMEM93	KIAA0020	EIF5	EIF3A	EIF1	TGIF2	KRAS	PRDX6	CHD1	ENOPH1	ARCN1	ZFP36	NRGN	PER2	PTPN6	PIGR	ARPC3	NAMPT	NR2F1	CNOT8	MRFAP1L1	NBN	BTG3	PCBP1	SLC7A5	FAM3C	TIMM9	METAP1	CPA3	FXR1	GCLC
GSE44649_NAIVE_VS_ACTIVATED_CD8_TCELL_MIR155_KO_DN	http://www.broadinstitute.org/gsea/msigdb/cards/GSE44649_NAIVE_VS_ACTIVATED_CD8_TCELL_MIR155_KO_DN	Sig564	C18orf54	DPY19L4	TTK	HIST1H2BL	RAD51AP1	NFS1	CEP70	NPAT	BTBD10	TPK1	ATP11A	CSTF2	TMED5	YTHDC2	ARHGAP6	P2RY10	GTF2A2	COL4A3BP	GRSF1	ZBTB33	FBXL5	MAN1A1	HSDL2	PBRM1	GNPNAT1	SCAI	SLAMF6	SPECC1	ZNF546	METTL15	HACL1	INTS6	DZIP3	MTFMT	CDC25C	GABPA	MUDENG	CD274	RASAL2	KLRD1	NUP205	LIMS3L	C7orf60	TBP	BLZF1	RPS6KA3	PDSS1
GSE44649_WT_VS_MIR155_KO_NAIVE_CD8_TCELL_UP	http://www.broadinstitute.org/gsea/msigdb/cards/GSE44649_WT_VS_MIR155_KO_NAIVE_CD8_TCELL_UP	Sig565	ODZ4	TEF	SQRDL	WDFY2	FADS1	GLI2	MYO10	CCL22	HPN	GAB1	AATK	CADPS2	ABCD2	GLT8D1	SYNE2	TF	NOC2L	BCL2L1	CDK6	RCC1	IGFBP4	MS4A7	TGM1	CAMKV	NCKAP5L	GPD1	ARRB1	43527	ZNF629	AHSP	ALDH1L1	SLCO2B1	VPS37D	ETV5	MAG	DBI	SIRPA	LGMN	PLD1	TTC28	DAK	SLC46A2	C3orf32	C2CD2	PRRT1	HEXA	SLC4A1
GSE44649_NAIVE_VS_ACTIVATED_CD8_TCELL_DN	http://www.broadinstitute.org/gsea/msigdb/cards/GSE44649_NAIVE_VS_ACTIVATED_CD8_TCELL_DN	Sig566	RWDD3	TIRAP	CDC14A	TMEM135	SSX2IP	RNLS	TTC13	TMEM109	SLC19A2	UBE2T	NDUFB8	IMPA2	HPS4	FAM18B1	C18orf45	NGFRAP1	IMMP1L	SKP2	NEURL1B	IRF2BPL	AMZ2	SLC25A26	CDC25C	PBXIP1	GEMIN6	NFYB	LIN54	HAUS4	PCBD2	C18orf55	RWDD4	GAS6	RAB33B	AHRR	SHPRH	NUS1	KBTBD8	CTNS	MAP4K2	SREK1IP1	PHC3	PIN4	TBL1XR1	IGIP	DSCC1	NAA50	DCUN1D4
GSE44649_WT_VS_MIR155_KO_ACTIVATED_CD8_TCELL_UP	http://www.broadinstitute.org/gsea/msigdb/cards/GSE44649_WT_VS_MIR155_KO_ACTIVATED_CD8_TCELL_UP	Sig567	ETV3	TSPAN3	ADPRH	FAM176B	FLJ40606	IRF1	CPSF3L	DHX58	TAP2	JAK1	TNFSF9	GYG1	TMEM39A	PTPN2	PLEKHG2	PACS2	NDST2	LAMP1	ELMO3	SLC4A11	FTSJD2	RND1	CASP4	ISCU	NXF1	SBNO2	PARP9	CPSF7	IRGM	FAM114A1	ADAM9	DOK1	LAD1	MFHAS1	TCF25	MRPS7	GPBP1	PPA1	IFFO2	ST7	GBP7	NT5C3	TNIP2	GK	SLFN13	MLLT6	GPR4
GSE44649_WT_VS_MIR155_KO_ACTIVATED_CD8_TCELL_DN	http://www.broadinstitute.org/gsea/msigdb/cards/GSE44649_WT_VS_MIR155_KO_ACTIVATED_CD8_TCELL_DN	Sig568	RWDD2A	DYNC1LI1	RAPSN	BST1	RPL32	KIF5A	CSMD3	HRG	ABCD2	BDKRB2	CSGALNACT1	ARSG	SUSD3	LOC100505876	FNDC7	HSD17B8	HK2	MRPS5	FAM127A	CD209	C11orf83	SRL	MCEE	CLN3	POLR3H	PDCD2L	IRS1	WDR55	CMC1	ELOVL6	PRSS8	SGSM2	PTX4	KIAA0586	CD37	ODZ4	DKK3	C2orf56	ADCK1	PSPH	XCR1	TAS2R1	HOXA4	HOMER2	MMP12	CASR	ZNHIT3
GSE44649_WT_VS_MIR155_KO_NAIVE_CD8_TCELL_DN	http://www.broadinstitute.org/gsea/msigdb/cards/GSE44649_WT_VS_MIR155_KO_NAIVE_CD8_TCELL_DN	Sig569	LAPTM4B	SPHK1	GSTT1	MFSD2B	GAS2	CCL5	TSPO	PMVK	CISH	CNN3	OAS1	NDRG1	FABP5	SAA1	CDYL	MLLT6	TUBA1A	YWHAB	VAPA	NRIP1	HTRA1	CCR7	PALLD	BCL2L14	STK4	CDKN2B	SFMBT2	PTGER4	C7orf74	IL4I1	CSDA	AVPR2	TRAF2	IL1RN	PARP12	TMEM19	PRMT2	EDEM1	CEP350	KDM2B	BASP1	DRAM1	RRAS2	DNAH2	GPR85	FAM89A	ABTB2
GSE46025_WT_VS_FOXO1_KO_KLRG1_LOW_CD8_EFFECTOR_TCELL_UP	http://www.broadinstitute.org/gsea/msigdb/cards/GSE46025_WT_VS_FOXO1_KO_KLRG1_LOW_CD8_EFFECTOR_TCELL_UP	Sig570	TTLL9	ARRDC2	EDDM3B	ST6GALNAC6	FHOD1	YRDC	SLC12A5	RNF182	TAT	TES	FPR2	SLC14A1	WDFY3	SLC33A1	CTSA	CASC3	KIAA0090	NUDC	LOC286272	HIF3A	H6PD	ADAMTS3	AGPAT4	PIGH	RASGRF1	PKDREJ	CEP85	HSD3B1	TEX14	EFHD2	SLC18A3	RAF1	PLCB3	CALU	ZCWPW2	THEMIS	PIP5K1A	OCM2	KLF7	CA2	PIEZO1	UCK2	TCTEX1D1	MT3	TOX4	NNMT	IGF1
GSE46025_WT_VS_FOXO1_KO_KLRG1_LOW_CD8_EFFECTOR_TCELL_DN	http://www.broadinstitute.org/gsea/msigdb/cards/GSE46025_WT_VS_FOXO1_KO_KLRG1_LOW_CD8_EFFECTOR_TCELL_DN	Sig571	C1orf56	SSR1	YIPF4	CLASP2	SUMO3	ANO6	TK2	DDX52	ZCCHC11	HMMR	EZR	NPM1	ZFAND6	G3BP2	SCYL2	ATF2	CMPK2	FOXN2	TRAF3IP3	GPR65	HNRNPUL1	SNORA37	SENP7	RANBP9	CLSTN2	LOC644613	EXPH5	PHF6	C14orf129	LOC283588	MBLAC2	HGD	PSMD12	PDE12	PDS5B	DYNC1I2	TRMT5	CCR10	LOC285628	PRNP	SMARCA2	ABCC9	FMO9P	YES1	LAMP2	RWDD3	TTF2
GSE43260_BTLA_POS_VS_NEG_INTRATUMORAL_CD8_TCELL_UP	http://www.broadinstitute.org/gsea/msigdb/cards/GSE43260_BTLA_POS_VS_NEG_INTRATUMORAL_CD8_TCELL_UP	Sig572	GMFG	TRIM16	PHF1	RPN1	RRP12	HTATIP2	TMED9	DVL3	NPC1	ITGB7	ATP6V0D1	CD63	PGM3	S100P	CKS2	SRSF3	PSMD7	HSP90B1	HOMER3	FCER1A	VCP	TLK1	RRAGD	RBBP4	ANXA2	PPIF	PDIA3	RUSC2	LMNA	FBP1	RRBP1	VDAC3	LRRC42	MCFD2	PDIA4	NOTCH3	HNRNPU	KDELR2	SEC24D	EMP1	EIF4G1	TSPO	UBE2H	BLOC1S1	PITPNB	KEAP1	NHP2
GSE43260_BTLA_POS_VS_NEG_INTRATUMORAL_CD8_TCELL_DN	http://www.broadinstitute.org/gsea/msigdb/cards/GSE43260_BTLA_POS_VS_NEG_INTRATUMORAL_CD8_TCELL_DN	Sig573	RPS15A	MICA	PKD2	PRKAA1	RAP1GAP	ATF6	TRAF4	OXA1L	ZNF10	SNX19	ENG	MT2A	DHX16	CYP2C19	ERCC6	UBXN2B	ZNF175	HLA-E	FH	ATP5A1	KDM1A	TUBB	POLB	LYN	JAK1	RFTN1	NSF	FLT1	HOXB1	PEX13	PTDSS1	ANAPC5	CAMTA2	RAB3GAP1	RPS8	ZC3H14	MARCKSL1	TXNL4A	CCS	TOR1B	PTPN2	ADA	NCAPD2	ETV5	HIST1H2BD	POLR2J	DGCR9
GSE45365_HEALTHY_VS_MCMV_INFECTION_CD8_TCELL_IFNAR_KO_UP	http://www.broadinstitute.org/gsea/msigdb/cards/GSE45365_HEALTHY_VS_MCMV_INFECTION_CD8_TCELL_IFNAR_KO_UP	Sig574	DHRS7B	ADAM8	ZNF397	C6orf145	SMR3A	XCR1	RAP2C	LRRC56	DUSP19	CENPL	SYS1	EDNRB	DOK6	TRA@	TMEM101	CCDC153	DSN1	TSPAN31	PAQR3	FAM27E3	LOC285178	AANAT	LOC440300	SPINLW1	TMEM107	WNT5A	LILRA2	TTC28	GPR180	NEUROG1	ZNF844	LOC730098	RAPGEF4	KCNK1	HIST1H4H	JPH2	HERC2	SYNC	ULK4	PPIL4	KCNQ5	C19orf42	CST9	CRYGS	C21orf96	QRFPR	TNFRSF14
GSE45365_HEALTHY_VS_MCMV_INFECTION_CD8_TCELL_IFNAR_KO_DN	http://www.broadinstitute.org/gsea/msigdb/cards/GSE45365_HEALTHY_VS_MCMV_INFECTION_CD8_TCELL_IFNAR_KO_DN	Sig575	OR1F2P	MAPT	LPPR4	RASGRF2	TRIM42	RGS16	SPRR2C	PITHD1	OSTalpha	BANF2	COL11A2	PRKAG3	PIP	ATPAF2	BSN	IL11	CTSF	ATF6B	AGER	NUDT3	HECA	ARL4C	C16orf55	ETF1	FAM167A	USP29	NOXO1	WNT11	LINC00113	CLCF1	INO80D	ZNF710	IL12A	KLRF1	IL22RA1	SSC5D	RASGEF1B	BLNK	VWA1	IMPG1	FLJ33996	OPN4	CXorf22	KIAA2022	PLD4	CIB2	GAR1
[truncated: 153 more columns]

## Sheet: Supplementary Table 6
Supplementary Table 6. Correlation matrix between single cell transcriptome data in Fig. 4F and publicly available gene signatures in Supplementary Table 5.
	Sig1	Sig2	Sig3	Sig4	Sig5	Sig6	Sig7	Sig8	Sig9	Sig10	Sig11	Sig12	Sig13	Sig14	Sig15	Sig16	Sig17	Sig18	Sig19	Sig20	Sig21	Sig22	Sig23	Sig24	Sig25	Sig26	Sig27	Sig28	Sig29	Sig30	Sig31	Sig32	Sig33	Sig34	Sig35	Sig36	Sig37	Sig38	Sig39	Sig40	Sig41	Sig42	Sig43	Sig44	Sig45	Sig46	Sig47	Sig48	Sig49
Sig47	0.0970879	0.210908	0.378141	0.104185	0.347976	-0.139582	0.327964	0.0916311	0.170881	0.216282	0.108377	0.364289	0.0757833	0.308461	0.0205843	0.281081	0.0134928	0.254602	0.301989	0.124049	0.349281	0.0388102	0.361583	-0.156857	0.213064	-0.00230258	0.488844	0.337178	0.106838	0.0791171	0.169501	0.173223	-0.490526	-0.162731	-0.356883	-0.225234	-0.112533	0.032435	-0.0703564	-0.119268	-0.255319	-0.240287	0.160588	0.222844	0.429456	0.256975	1	-0.547851	0.805565
Sig49	0.103158	0.167338	0.32044	0.045177	0.407542	-0.147638	0.284923	0.118731	0.0750302	0.227329	0.0471551	0.317275	0.0817575	0.310482	-0.00270046	0.23616	0.0322411	0.164778	0.279187	0.146192	0.289275	0.0165336	0.336722	-0.162613	0.226557	-0.0333781	0.414755	0.280934	0.0954638	0.0737217	0.135209	0.150053	-0.452219	-0.206822	-0.308676	-0.217921	-0.0768124	-0.00664812	-0.0897378	-0.0786801	-0.220831	-0.23491	0.116346	0.238728	0.377949	0.21475	0.805565	-0.546528	1
Sig179	0.411518	0.305945	0.563714	0.18346	0.483657	0.199092	0.478881	0.199816	0.258408	0.240834	0.358454	0.5055	0.263353	0.43488	0.331035	0.479007	0.0803444	0.399344	0.362162	0.277516	0.542167	0.0484735	0.565147	0.067971	0.313902	-0.0162592	0.643588	0.527965	0.323195	0.349105	0.207262	-0.0472371	-0.265518	-0.373327	-0.0327388	-0.3586	0.139402	-0.16847	-0.0235745	0.0464296	0.0781319	-0.283052	0.282028	0.352874	0.513475	0.336309	0.602506	-0.150445	0.559937
Sig397	0.339815	0.200201	0.580874	0.389779	0.398687	0.13183	0.345463	0.133284	0.137402	0.123127	0.339733	0.434589	0.217776	0.394276	0.244986	0.440989	0.0583316	0.466491	0.249711	0.252763	0.472306	0.0733586	0.514009	0.0429272	0.222822	-0.101551	0.62843	0.546932	0.183045	0.245355	0.103403	-0.0131347	-0.287114	-0.344343	-0.0786844	-0.329017	0.0971554	-0.194139	-0.066867	0.0465025	0.0065769	-0.256022	0.306809	0.221115	0.557429	0.252526	0.595096	-0.21809	0.508571
Sig175	0.335008	0.270465	0.461176	0.146671	0.431769	0.127305	0.433843	0.183137	0.229748	0.244761	0.264049	0.43248	0.217132	0.381101	0.25058	0.395006	0.080269	0.324335	0.341814	0.240324	0.470397	0.0476867	0.468319	0.0342568	0.284831	0.0142357	0.544316	0.446664	0.291343	0.282253	0.194453	0.0175889	-0.244434	-0.287962	-0.074942	-0.29197	0.101734	-0.0877656	-0.0209555	0.0133219	0.0477253	-0.234451	0.223599	0.281035	0.453504	0.292929	0.589892	-0.216751	0.557565
Sig500	0.455912	0.265803	0.692371	0.268183	0.469391	0.291781	0.414507	0.173391	0.185208	0.201958	0.420224	0.543582	0.29513	0.387102	0.352979	0.556424	0.108103	0.464844	0.342156	0.289319	0.565592	0.0583227	0.613929	0.108389	0.317482	-0.116937	0.712887	0.5676	0.271964	0.334324	0.125911	-0.132463	-0.238256	-0.432048	-0.0107889	-0.384629	0.125591	-0.258011	-0.0530449	0.0444612	0.0781604	-0.301327	0.353014	0.277057	0.534336	0.338966	0.504129	-0.0878119	0.452841
Sig180	0.581115	0.357247	0.765879	0.264778	0.548508	0.408202	0.51759	0.255591	0.273513	0.259277	0.487361	0.630137	0.349914	0.489324	0.465347	0.631243	0.130874	0.508793	0.449628	0.370244	0.67541	0.0759351	0.696455	0.163349	0.371178	-0.0789993	0.798781	0.674952	0.404574	0.455947	0.190787	-0.181144	-0.184144	-0.507048	0.0850211	-0.455539	0.223506	-0.300189	-0.0331136	0.113895	0.189159	-0.33647	0.398994	0.336973	0.583616	0.406945	0.497311	-0.00767922	0.453106
Sig27	0.672954	0.353102	0.842104	0.222654	0.555803	0.527751	0.511363	0.226216	0.2619	0.187816	0.621694	0.628187	0.400521	0.484127	0.563429	0.67112	0.131126	0.606581	0.409396	0.375954	0.695672	0.116583	0.698521	0.232414	0.363393	-0.118064	1	0.73643	0.401921	0.536756	0.145165	-0.236395	-0.113142	-0.54029	0.168572	-0.471669	0.292268	-0.351554	-0.0444829	0.176599	0.262548	-0.331064	0.416295	0.349333	0.596652	0.44509	0.488844	0.0767901	0.414755
Sig145	0.502143	0.26118	0.784503	0.534726	0.501853	0.315	0.448521	0.170252	0.154786	0.135859	0.518241	0.567502	0.322727	0.438851	0.409591	0.611201	0.0875806	0.62924	0.303048	0.356392	0.59704	0.0899717	0.681481	0.164061	0.289568	-0.154108	0.753973	0.662699	0.285082	0.368333	0.0930398	-0.146443	-0.236344	-0.48462	0.0410175	-0.412096	0.184959	-0.328922	-0.0682228	0.107813	0.118067	-0.309638	0.41071	0.259256	0.681663	0.306398	0.464612	-0.0611221	0.409794
Sig149	0.480912	0.259262	0.732297	0.379359	0.486814	0.320397	0.435648	0.180421	0.169251	0.172576	0.471065	0.565804	0.321215	0.422546	0.393007	0.590207	0.120458	0.535445	0.32894	0.341857	0.584996	0.0898074	0.646655	0.151355	0.310497	-0.127864	0.716209	0.605029	0.292527	0.362378	0.105544	-0.144091	-0.212528	-0.453548	0.0440353	-0.384268	0.180597	-0.285178	-0.0520689	0.0967606	0.136865	-0.299305	0.380171	0.267707	0.590464	0.326799	0.464252	-0.0645013	0.420283
Sig147	0.460361	0.237481	0.730764	0.474336	0.469598	0.297934	0.403101	0.146214	0.141699	0.138389	0.495162	0.533613	0.316395	0.416719	0.389911	0.564428	0.0830804	0.580867	0.286123	0.345983	0.563897	0.080926	0.647859	0.14421	0.279249	-0.156024	0.716161	0.618079	0.259235	0.350889	0.090298	-0.152853	-0.230891	-0.461641	0.0385266	-0.401521	0.173819	-0.313865	-0.054611	0.107199	0.106116	-0.300854	0.395341	0.250608	0.64916	0.302412	0.461496	-0.0606695	0.416055
Sig572	0.586942	0.325853	0.714773	0.173231	0.531384	0.458044	0.491894	0.2134	0.233021	0.190742	0.501473	0.581732	0.344242	0.44023	0.468433	0.612021	0.11923	0.504301	0.38978	0.342738	0.625593	0.11219	0.629872	0.208257	0.348384	-0.0952941	0.764324	0.618428	0.389834	0.478071	0.10496	-0.197121	-0.104185	-0.47161	0.134801	-0.404232	0.251636	-0.300856	-0.0295789	0.159598	0.220457	-0.255025	0.374192	0.305282	0.524152	0.404809	0.459341	0.0167189	0.415053
Sig527	0.395942	0.244331	0.571681	0.193245	0.421549	0.251885	0.363942	0.165423	0.189789	0.149296	0.372541	0.448486	0.237598	0.365225	0.323981	0.46478	0.0752827	0.411634	0.294758	0.252776	0.468219	0.0505675	0.529468	0.0886895	0.26412	-0.0876292	0.625323	0.49331	0.255606	0.309062	0.140373	-0.122188	-0.201825	-0.385317	0.0347077	-0.337328	0.157652	-0.226685	-0.0506512	0.0719016	0.104744	-0.269341	0.308413	0.360084	0.452253	0.298031	0.45858	-0.0396146	0.420484
Sig556	0.530587	0.303094	0.698486	0.1715	0.452176	0.396984	0.429216	0.21139	0.222136	0.221467	0.513329	0.541197	0.317929	0.400563	0.473176	0.543537	0.107967	0.511623	0.421535	0.302731	0.585033	0.0767011	0.586342	0.132855	0.326459	-0.103172	0.779798	0.599353	0.344691	0.422917	0.218413	-0.189744	-0.152876	-0.475224	0.0762017	-0.413094	0.189462	-0.293217	-0.0545346	0.0879048	0.166249	-0.311782	0.333915	0.299671	0.540897	0.46428	0.443071	0.0267516	0.381944
Sig421	0.485061	0.288176	0.63828	0.192313	0.466436	0.352321	0.460846	0.190299	0.243448	0.215038	0.474164	0.509357	0.321637	0.417812	0.439075	0.51783	0.107954	0.470433	0.366062	0.330705	0.549038	0.0576368	0.557543	0.171917	0.310173	-0.0594949	0.680419	0.566342	0.326119	0.411164	0.185009	-0.104368	-0.134618	-0.410666	0.0850198	-0.362543	0.205085	-0.229597	-0.00955073	0.121528	0.169865	-0.268896	0.339681	0.291007	0.485705	0.345975	0.441928	0.0130518	0.397563
Sig73	0.316417	0.447232	0.445956	0.0232982	0.316474	0.20196	0.447509	0.276574	0.278545	0.243077	0.314771	0.405354	0.212569	0.285319	0.322998	0.372257	0.104363	0.315344	0.453763	0.193792	0.447497	0.0383683	0.393435	0.0180297	0.258319	0.0375265	0.550745	0.408366	0.267492	0.268009	0.254311	-0.0417547	-0.154564	-0.281192	-0.0506719	-0.287031	0.0602571	-0.0802608	-0.0228128	-0.0216062	0.0613535	-0.234278	0.203998	0.245652	0.342207	0.38599	0.434548	-0.0648532	0.354613
Sig198	0.510348	0.266803	0.748722	0.363724	0.46712	0.378941	0.42532	0.162978	0.18656	0.154996	0.493187	0.536065	0.331638	0.398306	0.421567	0.571313	0.128371	0.542759	0.326906	0.342736	0.576954	0.0824161	0.6233	0.176989	0.296751	-0.129624	0.743121	0.621165	0.300066	0.396619	0.106486	-0.171739	-0.173715	-0.464037	0.0732741	-0.388956	0.191121	-0.309577	-0.0505699	0.109741	0.144868	-0.286903	0.392851	0.267063	0.580383	0.349432	0.431954	-0.0140295	0.356372
Sig382	0.517502	0.296926	0.696354	0.210484	0.473098	0.414206	0.470432	0.203545	0.256136	0.190203	0.464299	0.551884	0.317371	0.39735	0.428316	0.565566	0.0917558	0.472546	0.353067	0.301077	0.612523	0.0874637	0.600911	0.189339	0.311274	-0.0510811	0.717155	0.59241	0.364552	0.406014	0.137566	-0.163742	-0.146297	-0.422256	0.0803106	-0.384691	0.198059	-0.247592	-0.0231616	0.105927	0.173196	-0.266205	0.34149	0.27635	0.501076	0.381247	0.431143	0.00324621	0.368844
Sig90	0.529312	0.258906	0.791397	0.537518	0.465249	0.37397	0.432583	0.158201	0.17092	0.108063	0.62762	0.563395	0.343423	0.413088	0.471881	0.618199	0.0814326	0.737398	0.283536	0.366647	0.615584	0.104764	0.661423	0.212424	0.274102	-0.156298	0.777086	0.698362	0.288021	0.405672	0.0963694	-0.178839	-0.165178	-0.484673	0.105608	-0.41987	0.223152	-0.343294	-0.0646111	0.150049	0.169997	-0.295862	0.400583	0.249196	0.666506	0.326092	0.430126	0.0108201	0.337317
Sig522	0.458061	0.245493	0.667545	0.428526	0.460977	0.299755	0.419128	0.155551	0.155074	0.1494	0.439318	0.503368	0.297299	0.412118	0.382112	0.528588	0.109485	0.521818	0.308702	0.322289	0.539206	0.1029	0.591882	0.166087	0.272427	-0.10779	0.666005	0.588186	0.290499	0.356511	0.0885985	-0.13506	-0.1711	-0.427868	0.0706984	-0.383133	0.210562	-0.280593	-0.0469786	0.131222	0.149951	-0.271907	0.342046	0.23912	0.578607	0.285773	0.429908	-0.0491956	0.369469
Sig45	0.407879	0.190785	0.59657	0.530722	0.420964	0.193173	0.35303	0.13789	0.0920167	0.100442	0.410048	0.427398	0.271859	0.350419	0.324367	0.4443	0.0930247	0.531208	0.23493	0.344352	0.459727	0.093186	0.533714	0.121489	0.227826	-0.130126	0.596652	0.549094	0.220283	0.317649	0.0622572	-0.0868069	-0.214271	-0.398565	0.0165529	-0.352949	0.153136	-0.277777	-0.0708067	0.104513	0.0833109	-0.243293	0.307311	0.202473	1	0.221478	0.429456	-0.114719	0.377949
Sig112	0.369851	0.191361	0.607604	0.239182	0.377076	0.24161	0.324574	0.128596	0.113682	0.146024	0.338577	0.458181	0.253509	0.305166	0.277415	0.478315	0.0957129	0.386872	0.287044	0.260175	0.461775	0.104871	0.511481	0.0770179	0.262232	-0.109289	0.585808	0.467532	0.202742	0.252452	0.0921444	-0.10573	-0.212519	-0.347183	-0.0310521	-0.305548	0.0769922	-0.199677	-0.039163	0.0208419	0.0411644	-0.231541	0.28992	0.212743	0.470767	0.279361	0.423733	-0.108966	0.364357
Sig516	0.413742	0.26683	0.503771	0.0739423	0.419125	0.304021	0.370843	0.162853	0.183009	0.171251	0.312605	0.438258	0.236985	0.362362	0.309525	0.444359	0.132113	0.315677	0.298965	0.254013	0.471577	0.0740173	0.462911	0.13373	0.285288	-0.0443686	0.567843	0.46016	0.282688	0.318261	0.116839	-0.0971829	-0.120181	-0.34542	0.0483409	-0.305181	0.165114	-0.186979	-0.0184609	0.0957559	0.131778	-0.235697	0.286228	0.242854	0.387691	0.296643	0.423568	-0.0535915	0.395135
Sig346	0.419004	0.224227	0.614314	0.230748	0.442996	0.291724	0.376798	0.144587	0.150817	0.149374	0.405742	0.47379	0.256396	0.353173	0.351551	0.490496	0.0786855	0.436274	0.307833	0.269646	0.496761	0.0695183	0.518038	0.127032	0.285363	-0.0899403	0.630599	0.502156	0.250326	0.314754	0.109036	-0.126032	-0.179368	-0.379176	0.0156428	-0.338359	0.127729	-0.233338	-0.0363283	0.0645663	0.0889636	-0.254374	0.30095	0.240244	0.471053	0.283718	0.4218	-0.0645483	0.365643
Sig558	0.51725	0.326362	0.638075	0.170053	0.469023	0.385255	0.439037	0.196416	0.261206	0.182646	0.468483	0.507632	0.306202	0.417215	0.424764	0.53602	0.0929794	0.460671	0.354765	0.307979	0.548305	0.0769872	0.569591	0.179104	0.324613	-0.0776936	0.704963	0.554854	0.344748	0.439905	0.1422	-0.17446	-0.112075	-0.447738	0.127464	-0.387596	0.239788	-0.275934	-0.0339782	0.14709	0.20669	-0.285931	0.310862	0.296266	0.481987	0.343245	0.419957	0.0494629	0.38331
Sig139	0.392509	0.192601	0.639106	0.600548	0.41471	0.200815	0.362337	0.127051	0.0876731	0.112721	0.419666	0.45349	0.273458	0.36136	0.330517	0.482152	0.0536927	0.558966	0.218715	0.30317	0.488479	0.0837713	0.576511	0.135575	0.225458	-0.151012	0.593188	0.579025	0.193863	0.298501	0.0730868	-0.112375	-0.235096	-0.414008	0.0134041	-0.355761	0.14286	-0.297407	-0.0621752	0.0916598	0.0636485	-0.257267	0.345241	0.196697	0.645327	0.21659	0.413343	-0.0818383	0.35496
Sig257	0.336737	0.213225	0.449065	0.0972222	0.397968	0.185173	0.333233	0.157363	0.144068	0.217953	0.239222	0.372361	0.211177	0.351035	0.246726	0.347985	0.0922283	0.278145	0.299222	0.248178	0.383237	0.0453944	0.410277	0.0667279	0.305407	0.008813	0.486479	0.376348	0.275255	0.238295	0.158079	-0.0663367	-0.184177	-0.305885	7.82608e-05	-0.27261	0.11248	-0.162936	-0.0347104	0.0496582	0.0734818	-0.221089	0.239216	0.254071	0.35244	0.257612	0.40801	-0.0959101	0.413104
Sig368	0.641761	0.34788	0.756925	0.321628	0.580826	0.478027	0.541291	0.255543	0.238728	0.195915	0.548282	0.600772	0.384523	0.498416	0.530058	0.630042	0.126798	0.567069	0.406098	0.400665	0.655666	0.0996545	0.695457	0.255146	0.352108	-0.0998583	0.77686	0.666756	0.457088	0.538911	0.13769	-0.225361	-0.0857962	-0.543212	0.190947	-0.472325	0.308596	-0.358283	-0.0481666	0.197155	0.295702	-0.319609	0.438458	0.341582	0.613372	0.390582	0.407375	0.0827784	0.380962
Sig552	0.52195	0.300204	0.703481	0.233973	0.44636	0.40111	0.424674	0.206688	0.218131	0.218191	0.503744	0.526242	0.327664	0.392737	0.464733	0.542141	0.12299	0.512783	0.407737	0.310695	0.570116	0.0980677	0.594057	0.142968	0.320845	-0.108217	0.760534	0.600858	0.338352	0.412554	0.181124	-0.19277	-0.136268	-0.475971	0.0928625	-0.420218	0.195737	-0.30041	-0.0380626	0.0919578	0.173154	-0.305722	0.332445	0.286493	0.548432	0.426931	0.406284	0.0359948	0.344487
Sig492	0.423008	0.263604	0.571132	0.166873	0.439168	0.289162	0.405251	0.211396	0.211467	0.240055	0.368239	0.486341	0.251506	0.390656	0.34769	0.474359	0.104541	0.363753	0.361568	0.257269	0.523541	0.0376097	0.538953	0.142564	0.323904	0.00418927	0.603364	0.496076	0.321731	0.362118	0.187407	-0.114861	-0.159213	-0.390117	0.0586009	-0.338487	0.172628	-0.207121	-0.00483802	0.0866692	0.147311	-0.261752	0.28584	0.279262	0.439607	0.309007	0.405258	-0.0198284	0.38667
Sig129	0.64452	0.381067	0.746793	0.268108	0.59065	0.499066	0.553568	0.291574	0.248725	0.222903	0.521016	0.617164	0.395314	0.494903	0.525197	0.633274	0.128123	0.512866	0.406392	0.396936	0.646349	0.0918829	0.69037	0.246524	0.385335	-0.0900304	0.767626	0.648201	0.44747	0.51811	0.15544	-0.231973	-0.0692085	-0.540267	0.215505	-0.467802	0.325174	-0.351504	-0.0287855	0.20601	0.311395	-0.322233	0.392162	0.354023	0.561643	0.394119	0.398845	0.0885814	0.384661
Sig531	0.502542	0.272542	0.666426	0.229614	0.463302	0.377652	0.41381	0.18619	0.197503	0.154596	0.458056	0.515985	0.30212	0.397237	0.417986	0.536223	0.105851	0.474648	0.325149	0.311319	0.54464	0.0574273	0.578417	0.170554	0.322238	-0.106085	0.677436	0.562313	0.317932	0.382426	0.121536	-0.177794	-0.136326	-0.43776	0.0989739	-0.377915	0.200486	-0.280972	-0.0268683	0.117809	0.166079	-0.273242	0.369674	0.296057	0.489981	0.329932	0.398316	0.0248634	0.360191
Sig127	0.616685	0.329568	0.732414	0.252212	0.564557	0.497305	0.49408	0.252917	0.220926	0.193112	0.504672	0.578673	0.381167	0.449786	0.492543	0.601608	0.11908	0.488407	0.376236	0.378853	0.61324	0.0883115	0.664128	0.240354	0.367917	-0.105585	0.740887	0.622779	0.402048	0.495508	0.12968	-0.226391	-0.0673496	-0.516908	0.208996	-0.445239	0.317754	-0.346245	-0.0243219	0.203868	0.291181	-0.303604	0.378361	0.335534	0.524436	0.375425	0.393749	0.0770101	0.368326
Sig273	0.529818	0.256124	0.76776	0.519319	0.48192	0.385771	0.432181	0.155508	0.161065	0.0967727	0.581874	0.518344	0.349516	0.402626	0.468272	0.586935	0.0830542	0.659313	0.266847	0.373805	0.579916	0.109177	0.646274	0.257009	0.271245	-0.15615	0.74016	0.685075	0.284959	0.427891	0.0871672	-0.200905	-0.146657	-0.480212	0.125605	-0.410915	0.235335	-0.351485	-0.0576216	0.170301	0.181231	-0.283093	0.381966	0.251005	0.643722	0.294638	0.392594	0.0480677	0.32154
Sig309	0.515639	0.249393	0.741053	0.448599	0.472289	0.344945	0.415491	0.166637	0.156226	0.143141	0.480088	0.552357	0.311062	0.386384	0.407035	0.580783	0.0975963	0.548449	0.295561	0.325949	0.588905	0.0814383	0.640993	0.173632	0.297937	-0.14788	0.715723	0.628606	0.289718	0.382959	0.0814807	-0.188404	-0.170495	-0.46102	0.0774498	-0.401758	0.192095	-0.322551	-0.0435285	0.108657	0.144883	-0.279927	0.400853	0.245022	0.593436	0.293402	0.387815	-0.0106397	0.338482
Sig151	0.437075	0.208048	0.670982	0.624571	0.419139	0.268764	0.363192	0.135299	0.112003	0.0756974	0.499692	0.455175	0.299577	0.367286	0.386344	0.50679	0.0528708	0.630279	0.199592	0.330588	0.497673	0.0956705	0.579876	0.179599	0.23311	-0.153083	0.617881	0.617554	0.218158	0.33629	0.0800931	-0.141261	-0.182293	-0.439329	0.0805221	-0.367405	0.199163	-0.325908	-0.0625297	0.147035	0.120764	-0.251147	0.347419	0.207659	0.662211	0.22203	0.387045	-0.0239768	0.319667
Sig350	0.162068	0.139968	0.197219	-0.0849235	0.284633	0.0608126	0.225955	0.131065	0.142511	0.135353	0.124742	0.198124	0.0880202	0.205925	0.118949	0.161806	0.0238393	0.111489	0.189425	0.103463	0.194946	-0.00836548	0.200795	0.0101899	0.165308	0.0208193	0.263585	0.190618	0.141766	0.164015	0.151185	0.0651353	-0.144904	-0.134021	-0.0543855	-0.130157	0.0300997	0.000328159	-0.0166523	0.00976603	-0.0125348	-0.131043	0.0683376	0.210793	0.171025	0.145912	0.386628	-0.101243	0.399889
Sig177	0.52753	0.257369	0.731351	0.440285	0.505142	0.342311	0.429912	0.210666	0.138838	0.138376	0.498472	0.525915	0.322772	0.41241	0.433521	0.562107	0.0949249	0.5584	0.304187	0.341941	0.562808	0.0863999	0.636986	0.180423	0.286786	-0.13341	0.708896	0.619449	0.291438	0.391481	0.0977183	-0.189893	-0.15593	-0.475492	0.118047	-0.413216	0.237416	-0.33469	-0.0625895	0.146731	0.192782	-0.290575	0.36746	0.258127	0.622316	0.291529	0.386449	0.00587448	0.352206
Sig86	0.424318	0.259414	0.520618	0.110533	0.391279	0.335724	0.397475	0.175291	0.246889	0.478964	0.342896	0.555808	0.234605	0.558071	0.328633	0.436901	0.119468	0.338054	0.414946	0.23459	0.509494	0.0660456	0.464371	0.12821	0.328489	0.126837	0.557714	0.446734	0.310637	0.320591	0.302192	-0.0592326	-0.112197	-0.292482	0.048166	-0.296313	0.140788	-0.105188	0.0271598	0.059748	0.138511	-0.207806	0.243791	0.258725	0.361984	0.345783	0.385746	-0.0105363	0.326096
Sig412	0.534798	0.270747	0.737428	0.509578	0.466666	0.382304	0.438597	0.165663	0.195261	0.156106	0.555313	0.541422	0.332183	0.421762	0.474247	0.560644	0.106356	0.635817	0.304128	0.340853	0.568127	0.0951544	0.624824	0.210594	0.284051	-0.0894106	0.716886	0.646149	0.311352	0.427614	0.150481	-0.160197	-0.131814	-0.462368	0.145706	-0.393889	0.261162	-0.301926	-0.0427599	0.188136	0.194185	-0.268558	0.353326	0.28457	0.607205	0.309301	0.385645	0.0522861	0.31128
Sig263	0.432342	0.212243	0.629682	0.197739	0.387819	0.309413	0.337744	0.133447	0.132088	0.141623	0.43487	0.453044	0.275891	0.317238	0.36724	0.479583	0.0925882	0.446212	0.284441	0.254851	0.486603	0.0895435	0.50475	0.132322	0.24566	-0.119344	0.627187	0.493795	0.231674	0.316935	0.0791421	-0.135129	-0.155242	-0.358011	0.0431851	-0.312382	0.143626	-0.237545	-0.0308225	0.0734122	0.106825	-0.231908	0.296941	0.222979	0.478271	0.305171	0.384699	-0.0184727	0.330029
Sig328	0.495482	0.289318	0.588206	0.139013	0.459424	0.364833	0.454939	0.19684	0.227934	0.175723	0.429062	0.493519	0.321259	0.369687	0.444157	0.49289	0.105459	0.407361	0.379845	0.319302	0.510689	0.0753387	0.530109	0.188068	0.291918	-0.0647355	0.6344	0.504088	0.340617	0.442406	0.166508	-0.167519	-0.0862117	-0.416321	0.139195	-0.340362	0.246557	-0.256874	-0.0206404	0.163484	0.232732	-0.24675	0.282123	0.307709	0.475303	0.337094	0.384148	0.057078	0.37075
Sig157	0.43493	0.210016	0.669138	0.600618	0.419849	0.268539	0.368742	0.13089	0.10552	0.105057	0.49764	0.473033	0.317826	0.378194	0.39821	0.510708	0.0670454	0.61667	0.223681	0.32367	0.509863	0.0991662	0.588168	0.189009	0.228468	-0.149248	0.62578	0.617014	0.223539	0.349285	0.0773812	-0.140437	-0.179064	-0.442218	0.0720622	-0.371875	0.188361	-0.323052	-0.05493	0.130529	0.121367	-0.25842	0.354124	0.220086	0.654776	0.23125	0.383512	-0.0120297	0.318347
Sig248	0.549135	0.324159	0.720234	0.194458	0.446458	0.462973	0.440931	0.205847	0.263043	0.208542	0.53245	0.557564	0.326407	0.408562	0.504891	0.578829	0.112703	0.515309	0.403214	0.309109	0.601708	0.0913338	0.59484	0.192425	0.351916	-0.0793108	0.780551	0.628082	0.351066	0.42449	0.211743	-0.208297	-0.107444	-0.47005	0.12755	-0.415413	0.225409	-0.286746	-0.0133168	0.117447	0.210327	-0.293341	0.364591	0.306337	0.498163	0.423883	0.383133	0.0962065	0.311013
Sig117	0.467197	0.249467	0.638473	0.460669	0.476585	0.285573	0.424773	0.188769	0.150029	0.133694	0.417595	0.503793	0.280243	0.395574	0.360765	0.511907	0.0873115	0.498264	0.27635	0.318625	0.532832	0.0716238	0.620212	0.175171	0.277176	-0.110004	0.627794	0.572377	0.318368	0.370081	0.101055	-0.16273	-0.169065	-0.460041	0.0921611	-0.395397	0.214607	-0.314503	-0.0519756	0.135598	0.16343	-0.27617	0.367133	0.250251	0.598731	0.264552	0.382155	-0.0258488	0.351904
Sig246	0.399775	0.262636	0.559786	0.105371	0.375864	0.314095	0.353389	0.181305	0.242702	0.27756	0.385707	0.469236	0.235081	0.343839	0.350244	0.422442	0.115747	0.377062	0.404235	0.232695	0.486831	0.0530591	0.468929	0.0780596	0.313206	0.0033239	0.615498	0.510383	0.259673	0.300428	0.360501	-0.0974784	-0.156835	-0.325582	0.0186219	-0.315887	0.108847	-0.160482	-0.00823353	0.0188639	0.106229	-0.253278	0.273069	0.252084	0.399487	0.381879	0.381079	0.0199516	0.324464
Sig141	0.412213	0.200374	0.654899	0.57534	0.413447	0.245669	0.368493	0.128574	0.0961337	0.104813	0.441473	0.469408	0.293834	0.352982	0.359316	0.49696	0.0536562	0.561018	0.225669	0.309383	0.504039	0.0829977	0.582075	0.153838	0.229147	-0.156001	0.602552	0.586602	0.204599	0.318891	0.0701455	-0.131987	-0.204531	-0.418993	0.0383187	-0.359096	0.154094	-0.303859	-0.0573566	0.0955256	0.0898073	-0.256382	0.353347	0.190422	0.630179	0.224313	0.380726	-0.0430666	0.312353
Sig524	0.536699	0.267164	0.750402	0.41006	0.480395	0.396083	0.444957	0.185141	0.179738	0.138146	0.536249	0.533392	0.346845	0.407886	0.476356	0.589241	0.120112	0.576636	0.302211	0.350728	0.588034	0.113797	0.631534	0.218145	0.298478	-0.13008	0.745736	0.646665	0.31801	0.415576	0.0941595	-0.195177	-0.129656	-0.478675	0.134647	-0.414068	0.25777	-0.329259	-0.0400569	0.163446	0.208428	-0.290495	0.367965	0.270841	0.58108	0.322811	0.379628	0.0660273	0.315635
Sig201	0.585902	0.348224	0.657507	0.095267	0.481331	0.489983	0.470869	0.251241	0.263549	0.209007	0.496734	0.535465	0.344242	0.433736	0.485684	0.556309	0.128756	0.431625	0.387493	0.320118	0.588051	0.079759	0.574626	0.230649	0.349654	-0.0488195	0.709026	0.575513	0.428011	0.486879	0.153371	-0.203397	-0.0428452	-0.46976	0.189015	-0.394709	0.286719	-0.287433	-0.0251388	0.187361	0.276993	-0.276441	0.331847	0.308951	0.44719	0.400756	0.378293	0.118167	0.337076
Sig3	0.676889	0.286466	1	0.345998	0.561959	0.606016	0.455133	0.182926	0.194662	0.133903	0.637588	0.615989	0.419841	0.448082	0.576475	0.690407	0.124715	0.624828	0.338319	0.416358	0.673965	0.106824	0.712222	0.284803	0.339774	-0.167962	0.842104	0.713928	0.35682	0.500787	0.0931693	-0.281106	-0.0720816	-0.556348	0.232259	-0.46807	0.330488	-0.409324	-0.045078	0.235048	0.28347	-0.30258	0.421884	0.29762	0.59657	0.38112	0.378141	0.137846	0.32044
Sig143	0.41491	0.195637	0.64644	0.571702	0.410805	0.243428	0.360885	0.12732	0.0913591	0.101589	0.436583	0.456015	0.286456	0.349397	0.354055	0.493796	0.0574657	0.560941	0.221423	0.299756	0.49374	0.0824935	0.575262	0.15714	0.225536	-0.153229	0.5969	0.58402	0.203405	0.314976	0.069288	-0.133645	-0.198312	-0.421288	0.0478769	-0.357067	0.163269	-0.309011	-0.0603411	0.109482	0.0931163	-0.255191	0.348495	0.192509	0.632235	0.223577	0.3774	-0.0356719	0.311176
Sig573	0.452651	0.289935	0.575971	0.155551	0.432421	0.356096	0.398063	0.214054	0.196695	0.20773	0.388344	0.504512	0.29162	0.368038	0.386676	0.474559	0.116727	0.375745	0.350464	0.293227	0.512456	0.0760599	0.540037	0.152059	0.309312	-0.0426961	0.609246	0.512774	0.317624	0.389394	0.170636	-0.140693	-0.101276	-0.404803	0.100286	-0.352221	0.209006	-0.228461	-0.0231181	0.113625	0.201453	-0.261551	0.302427	0.281178	0.419918	0.33305	0.375177	0.0102033	0.355973
Sig411	0.609401	0.321451	0.662093	0.190381	0.555982	0.446454	0.489146	0.233799	0.233953	0.186383	0.513058	0.558313	0.385618	0.440309	0.505231	0.577001	0.129058	0.47992	0.37005	0.372683	0.598283	0.0644087	0.647651	0.219675	0.350324	-0.068232	0.703729	0.585477	0.407641	0.510599	0.153698	-0.207648	-0.0442991	-0.485331	0.214082	-0.408863	0.315072	-0.307193	-0.0253738	0.199702	0.294305	-0.28454	0.353661	0.360136	0.509236	0.350175	0.374844	0.119365	0.364874
Sig472	0.473123	0.243939	0.658115	0.304752	0.440792	0.350844	0.388993	0.167168	0.15664	0.150595	0.436254	0.488982	0.302533	0.375344	0.390841	0.51559	0.103295	0.473722	0.294431	0.293938	0.513179	0.0848204	0.566533	0.17416	0.293916	-0.113406	0.646245	0.554625	0.292665	0.371529	0.118012	-0.161218	-0.140559	-0.437686	0.0944858	-0.351386	0.202188	-0.298324	-0.0184907	0.118857	0.159059	-0.237556	0.32516	0.259302	0.508314	0.301638	0.374336	0.00295394	0.344685
Sig380	0.463488	0.2462	0.6404	0.253106	0.439284	0.30674	0.377194	0.171381	0.155822	0.16484	0.3976	0.485896	0.274101	0.361898	0.358071	0.492838	0.105942	0.410755	0.318777	0.278359	0.517688	0.0583697	0.562553	0.144242	0.315359	-0.102119	0.630999	0.506507	0.272577	0.355512	0.116094	-0.154716	-0.158705	-0.409851	0.0813647	-0.355835	0.190803	-0.256439	-0.0298642	0.111207	0.14899	-0.26768	0.319479	0.253576	0.480578	0.28335	0.374269	0.00384905	0.352061
Sig250	0.547691	0.329282	0.695213	0.245162	0.445329	0.446518	0.465044	0.204083	0.29687	0.243255	0.509095	0.568302	0.338777	0.411475	0.47222	0.559758	0.128028	0.509785	0.415357	0.319059	0.59961	0.0813535	0.597595	0.2016	0.348124	-0.0175316	0.722116	0.629115	0.378117	0.429791	0.294096	-0.161492	-0.106353	-0.434075	0.137146	-0.400771	0.237303	-0.259974	0.00694076	0.130041	0.230782	-0.279674	0.359772	0.308965	0.506674	0.409672	0.373097	0.106735	0.30173
Sig495	0.504395	0.251596	0.703484	0.367692	0.459491	0.37508	0.406042	0.173337	0.172313	0.140539	0.465443	0.534753	0.310461	0.407613	0.406287	0.556471	0.102131	0.524151	0.290749	0.324201	0.561017	0.0821892	0.61476	0.192372	0.289437	-0.128214	0.686138	0.588645	0.308249	0.367986	0.089583	-0.192068	-0.137015	-0.461569	0.10035	-0.401001	0.203162	-0.31596	-0.0417842	0.116705	0.182003	-0.278614	0.380433	0.26842	0.538487	0.310555	0.370411	0.0166301	0.332597
Sig395	0.486405	0.289803	0.623103	0.130998	0.456028	0.384134	0.426851	0.187952	0.222241	0.207445	0.439204	0.484432	0.300831	0.363073	0.42373	0.497619	0.124877	0.408946	0.367847	0.283276	0.529412	0.0597911	0.524511	0.14765	0.317297	-0.0498023	0.654554	0.514736	0.339115	0.383002	0.177534	-0.173923	-0.109506	-0.380213	0.103024	-0.317051	0.190366	-0.241533	-0.00862161	0.102113	0.174272	-0.222551	0.301443	0.287662	0.417471	0.369817	0.370306	0.0507558	0.333965
Sig563	0.567298	0.327048	0.669269	0.18792	0.541166	0.436455	0.507993	0.236376	0.209077	0.205365	0.452675	0.544006	0.331085	0.431617	0.47256	0.56737	0.133304	0.425846	0.412961	0.336148	0.5845	0.0760322	0.626676	0.193968	0.349399	-0.0806907	0.698495	0.580765	0.392011	0.469067	0.126454	-0.213094	-0.077298	-0.485796	0.177553	-0.418216	0.266338	-0.317106	-0.0329389	0.167058	0.257771	-0.290369	0.372815	0.310743	0.481885	0.361995	0.36943	0.075461	0.351333
Sig436	0.185167	0.10708	0.401999	0.101002	0.242451	0.0538959	0.207811	0.0782586	0.0745795	0.119985	0.213926	0.283842	0.113484	0.233127	0.149023	0.287462	0.0512922	0.261976	0.175109	0.12556	0.293697	0.0324576	0.321534	-0.0135886	0.153917	-0.0820583	0.421301	0.298838	0.0855923	0.111596	0.0588805	-0.0308052	-0.249217	-0.208645	-0.106428	-0.205223	-0.00664725	-0.106251	-0.0695772	-0.0390448	-0.0651064	-0.192209	0.179213	0.152207	0.296271	0.165714	0.368997	-0.150531	0.33178
Sig358	0.522258	0.274125	0.693615	0.446458	0.476331	0.390542	0.443268	0.193258	0.217768	0.165103	0.494128	0.581369	0.329355	0.416512	0.431895	0.570585	0.0866419	0.57383	0.333984	0.349508	0.608625	0.109126	0.628604	0.222941	0.302846	-0.0815044	0.677988	0.631074	0.333801	0.414156	0.123924	-0.152843	-0.116285	-0.443758	0.133708	-0.415093	0.240903	-0.287086	-0.0304294	0.158466	0.209305	-0.277586	0.369605	0.269078	0.58117	0.3139	0.368647	0.0450004	0.308273
Sig280	0.505111	0.262652	0.617229	0.11112	0.459152	0.422138	0.406947	0.173585	0.22502	0.170111	0.433025	0.507515	0.330618	0.411457	0.418187	0.503443	0.112239	0.394328	0.308958	0.299385	0.554028	0.086714	0.531136	0.188535	0.304957	-0.0670142	0.634048	0.518595	0.348157	0.420947	0.118773	-0.168432	-0.063466	-0.419459	0.158751	-0.351481	0.248855	-0.266327	-0.0183579	0.172701	0.213165	-0.240842	0.298165	0.315461	0.427366	0.336953	0.367683	0.0708843	0.347256
Sig239	0.365551	0.187792	0.56053	0.55679	0.401277	0.182884	0.363826	0.127783	0.114881	0.107163	0.345147	0.423328	0.245417	0.351257	0.273709	0.431177	0.0712366	0.478889	0.210436	0.295374	0.4405	0.0809426	0.52974	0.146921	0.20799	-0.092754	0.518937	0.533	0.24855	0.286764	0.0733917	-0.080108	-0.183057	-0.379509	0.0490291	-0.326521	0.175594	-0.254527	-0.0515253	0.126538	0.100147	-0.228883	0.301456	0.216039	0.55685	0.179908	0.367047	-0.0801371	0.358908
Sig68	0.490816	0.237156	0.680952	0.437047	0.39114	0.33724	0.374303	0.148793	0.150718	0.111271	0.49135	0.500306	0.298385	0.344286	0.418006	0.507724	0.086333	0.557505	0.275585	0.309864	0.547002	0.0979992	0.557067	0.161636	0.236232	-0.123571	0.698554	0.615454	0.263464	0.362219	0.0870949	-0.167375	-0.141967	-0.421527	0.083218	-0.371521	0.192309	-0.292053	-0.057648	0.120561	0.140294	-0.248165	0.336092	0.215776	0.607261	0.30848	0.365041	0.00308773	0.288842
Sig259	0.510449	0.281536	0.690642	0.409983	0.490885	0.356337	0.416627	0.191283	0.145151	0.159938	0.45887	0.504832	0.339862	0.380981	0.418971	0.523024	0.13267	0.540018	0.340958	0.381844	0.528682	0.0829916	0.58669	0.176782	0.291584	-0.101665	0.672243	0.605374	0.296172	0.369243	0.146936	-0.150627	-0.127413	-0.457486	0.12532	-0.395137	0.241678	-0.306768	-0.0678608	0.143842	0.196515	-0.273688	0.334054	0.26077	0.565481	0.291995	0.364753	0.0331465	0.332074
Sig12	0.505929	0.316554	0.615989	0.172942	0.440038	0.401381	0.466212	0.203275	0.292767	0.326685	0.397569	1	0.300297	0.491731	0.401599	0.682515	0.127782	0.400263	0.422371	0.302107	0.743064	0.08139	0.650264	0.182408	0.344343	0.0309221	0.628187	0.529863	0.383783	0.400073	0.220978	-0.138517	-0.089501	-0.36681	0.112883	-0.363189	0.204123	-0.199515	0.0150964	0.110972	0.207491	-0.252312	0.338651	0.282606	0.427398	0.353559	0.364289	0.0490662	0.317275
Sig491	0.391852	0.238551	0.460568	-0.0791099	0.382758	0.325225	0.374659	0.156982	0.267755	0.214453	0.3182	0.408461	0.226423	0.321838	0.34612	0.410583	0.0763373	0.261056	0.337607	0.21676	0.434871	0.0361383	0.407014	0.119858	0.302293	0.016751	0.501101	0.365155	0.258294	0.324866	0.198012	-0.0686092	-0.0742541	-0.257012	0.0946328	-0.246998	0.176243	-0.10718	0.0123993	0.114533	0.151087	-0.192807	0.205917	0.271142	0.261559	0.278255	0.363744	0.0679091	0.360478
Sig416	0.597604	0.293273	0.754947	0.405804	0.503348	0.461098	0.459389	0.193517	0.208579	0.158317	0.593241	0.570021	0.391262	0.411844	0.538716	0.603678	0.125411	0.616177	0.330895	0.362887	0.601921	0.0934747	0.645602	0.244795	0.316413	-0.0903225	0.762167	0.661927	0.335586	0.493386	0.147861	-0.225287	-0.0601849	-0.496611	0.204423	-0.419556	0.296627	-0.336573	-0.0403885	0.212499	0.278439	-0.280775	0.383187	0.300144	0.586362	0.342365	0.361592	0.11845	0.294067
Sig23	0.569935	0.302085	0.712222	0.313892	0.512373	0.429455	0.475776	0.215487	0.219719	0.176934	0.484597	0.650264	0.359128	0.450585	0.452586	0.692072	0.112845	0.493448	0.343997	0.359128	0.686114	0.0739883	1	0.220763	0.335862	-0.0982381	0.698521	0.598091	0.391538	0.462982	0.113583	-0.218626	-0.10166	-0.501336	0.16793	-0.415784	0.269095	-0.332286	-0.0374225	0.172016	0.242372	-0.297577	0.405337	0.331354	0.533714	0.329503	0.361583	0.0793572	0.336722
Sig171	0.247391	0.142674	0.465322	0.390498	0.316719	0.0884704	0.280243	0.0884331	0.0775198	0.0932259	0.237533	0.336641	0.181459	0.275245	0.18003	0.34834	0.053668	0.345199	0.183084	0.219578	0.34854	0.0588922	0.429352	0.0629299	0.184958	-0.0915712	0.432439	0.408166	0.151839	0.183496	0.0489581	-0.0626644	-0.21522	-0.283924	-0.0462193	-0.242975	0.0722015	-0.184338	-0.0400089	0.0292794	0.00910087	-0.17208	0.249528	0.152194	0.451524	0.160677	0.360839	-0.158948	0.328134
Sig401	0.384126	0.173172	0.673678	0.693831	0.362241	0.212073	0.338791	0.103858	0.0922062	0.0490287	0.485902	0.422832	0.259201	0.326225	0.374195	0.483374	0.0367426	0.635157	0.172541	0.316172	0.462164	0.0867293	0.549556	0.15389	0.200279	-0.16343	0.614774	0.58486	0.185454	0.284398	0.0655587	-0.11225	-0.214136	-0.391096	0.0455275	-0.332731	0.163609	-0.305511	-0.0607054	0.112993	0.0814431	-0.228538	0.330838	0.178128	0.636369	0.2013	0.360588	-0.0336172	0.282002
Sig512	0.470042	0.252788	0.655263	0.255031	0.474401	0.339459	0.417664	0.186676	0.146227	0.170552	0.412781	0.506058	0.288843	0.370307	0.39134	0.520453	0.114773	0.432528	0.344385	0.31106	0.542442	0.0693928	0.568395	0.164815	0.340243	-0.116514	0.639347	0.535101	0.2816	0.351279	0.0923987	-0.176926	-0.137371	-0.427869	0.0759627	-0.371502	0.171548	-0.281221	-0.0398457	0.0931157	0.14832	-0.267182	0.331754	0.257002	0.476758	0.299235	0.359152	-0.00300556	0.336266
Sig444	0.0471825	0.0902814	0.154195	-0.0419483	0.154398	-0.0255956	0.163591	0.0382423	0.103017	0.101655	0.0748369	0.152271	0.067351	0.133699	0.0590126	0.117279	0.019057	0.102103	0.159576	0.0656889	0.150252	0.00961041	0.135691	-0.0472542	0.105698	0.016162	0.202225	0.120988	0.0454313	0.0699342	0.138599	0.086329	-0.165678	-0.0444133	-0.100465	-0.0896956	-0.00345598	0.0371505	0.0021854	-0.0166221	-0.0355142	-0.112317	0.0575695	0.126098	0.138055	0.0998445	0.355986	-0.170918	0.359057
Sig454	0.562784	0.280236	0.652381	0.239926	0.519558	0.44033	0.447736	0.200902	0.196028	0.177919	0.46816	0.52148	0.337824	0.413098	0.466156	0.542971	0.107459	0.464245	0.346543	0.345538	0.551891	0.0783421	0.594329	0.23421	0.324476	-0.0863817	0.661669	0.576654	0.378174	0.461684	0.109486	-0.197339	-0.065212	-0.452986	0.172044	-0.3954	0.271104	-0.296325	-0.0199329	0.182603	0.243744	-0.260172	0.326011	0.303267	0.481623	0.316064	0.352854	0.0596163	0.330629
Sig388	0.486346	0.242402	0.619911	0.237809	0.455835	0.370359	0.388798	0.209214	0.157376	0.146257	0.435235	0.46137	0.302874	0.370318	0.39868	0.482822	0.112946	0.430323	0.283166	0.289898	0.497529	0.0853254	0.544416	0.169751	0.297099	-0.106726	0.627602	0.519747	0.295736	0.37062	0.0888851	-0.190115	-0.104702	-0.430882	0.135013	-0.369742	0.228578	-0.290677	-0.0548697	0.153306	0.187577	-0.258496	0.318453	0.274304	0.453935	0.295531	0.352726	0.0517776	0.31359
Sig342	0.223694	0.13903	0.334943	0.158704	0.277581	0.122579	0.263849	0.102351	0.109967	0.116457	0.220763	0.265397	0.209884	0.2368	0.209696	0.27217	0.0727457	0.240367	0.184013	0.221742	0.276009	0.0579247	0.307415	0.0475092	0.185866	-0.0134349	0.362356	0.303455	0.153403	0.21738	0.119215	-0.00235464	-0.148023	-0.202124	0.00229335	-0.189373	0.0993086	-0.078757	-0.00287324	0.0482656	0.0465982	-0.140764	0.141313	0.201692	0.314922	0.204058	0.351539	-0.0937451	0.347482
Sig392	0.433268	0.271822	0.550024	0.115171	0.413054	0.351786	0.392299	0.19282	0.191876	0.162439	0.365461	0.448569	0.279201	0.336993	0.351534	0.443013	0.118477	0.353936	0.301152	0.254353	0.479184	0.064627	0.497232	0.143901	0.303598	-0.0583756	0.577688	0.462605	0.317813	0.338117	0.117211	-0.145878	-0.0915856	-0.350195	0.088008	-0.318782	0.180494	-0.199797	-0.0103962	0.0990646	0.167832	-0.214401	0.292752	0.251357	0.369402	0.308737	0.350919	0.0131097	0.319541
Sig21	0.564867	0.35464	0.673965	0.181868	0.461084	0.467738	0.499279	0.235558	0.306873	0.221712	0.475677	0.743064	0.328687	0.444769	0.499956	0.683405	0.115995	0.44837	0.446823	0.317995	1	0.0842659	0.686114	0.233681	0.359078	-0.0178149	0.695672	0.608401	0.425722	0.46756	0.172138	-0.17584	-0.0575861	-0.412385	0.164479	-0.392572	0.254491	-0.237022	0.00858886	0.148537	0.260962	-0.257654	0.366083	0.283836	0.459727	0.388552	0.349281	0.111623	0.289275
Sig208	0.511811	0.29212	0.608136	0.17793	0.483379	0.402814	0.431614	0.212017	0.210023	0.196824	0.403902	0.499932	0.306048	0.425915	0.416095	0.507454	0.112676	0.387742	0.351322	0.303053	0.521673	0.0548708	0.574801	0.179859	0.336545	-0.0450708	0.63249	0.531309	0.393477	0.419899	0.162944	-0.186934	-0.0538394	-0.446389	0.166118	-0.375595	0.258625	-0.284025	-0.0168692	0.163065	0.234705	-0.266688	0.313009	0.313096	0.429973	0.331595	0.348596	0.0776718	0.331013
Sig514	0.303383	0.228527	0.45034	0.194144	0.323391	0.183108	0.274585	0.175073	0.105823	0.120822	0.278154	0.343551	0.198942	0.278913	0.269914	0.373906	0.0924614	0.317798	0.261332	0.221225	0.361673	0.0434184	0.375942	0.0801539	0.195047	-0.0712121	0.473557	0.378116	0.176282	0.243017	0.0993612	-0.0860792	-0.157569	-0.265402	-0.00284069	-0.232285	0.0919255	-0.151673	-0.0166357	0.0404766	0.0538213	-0.175701	0.199731	0.201949	0.350891	0.240523	0.348104	-0.0719789	0.304596
Sig5	0.576761	0.299035	0.561959	0.118672	1	0.403571	0.481729	0.319447	0.0853072	0.177041	0.362032	0.440038	0.32474	0.383789	0.400072	0.447912	0.122755	0.343433	0.321154	0.346981	0.461084	0.0640157	0.512373	0.205623	0.313579	-0.0918635	0.555803	0.481982	0.343028	0.41693	0.0965479	-0.177237	0.00674736	-0.45338	0.248486	-0.377831	0.358626	-0.304527	-0.0505843	0.271214	0.326263	-0.259518	0.270012	0.313853	0.420964	0.274528	0.347976	0.0374548	0.407542
Sig398	0.384949	0.308147	0.466643	0.194718	0.327958	0.289924	0.46282	0.217252	0.342284	0.250973	0.348636	0.48802	0.238931	0.405756	0.3437	0.4396	0.109122	0.368018	0.36768	0.251727	0.504306	0.0535611	0.445928	0.19646	0.29279	0.130477	0.516916	0.432795	0.407145	0.36553	0.248796	-0.0462756	-0.106369	-0.258509	0.0661742	-0.246881	0.164898	-0.0953749	0.0783645	0.0911328	0.165521	-0.16377	0.243056	0.233191	0.370483	0.370325	0.346033	0.0352429	0.26735
Sig378	0.365698	0.224781	0.474606	0.213578	0.354477	0.231716	0.354758	0.165728	0.171189	0.191429	0.272796	0.435783	0.21236	0.318098	0.266764	0.405848	0.0848258	0.300412	0.302007	0.227607	0.42243	0.0614608	0.45365	0.118736	0.296116	-0.0107843	0.494604	0.423716	0.299753	0.276291	0.145803	-0.0993499	-0.156167	-0.331535	0.0164697	-0.280407	0.117463	-0.182433	0.0117452	0.0489452	0.0908584	-0.218241	0.243011	0.224141	0.400759	0.313767	0.344927	-0.0645176	0.318822
Sig95	0.541748	0.34359	0.610469	0.0910339	0.441725	0.453908	0.466818	0.211267	0.288397	0.321632	0.442907	0.570156	0.303204	0.383758	0.482848	0.525088	0.145071	0.390628	0.558601	0.276902	0.632604	0.0817	0.526705	0.169644	0.340534	0.0409262	0.655296	0.538192	0.371447	0.41801	0.246118	-0.147403	-0.0533983	-0.357195	0.141067	-0.344118	0.221904	-0.165888	0.0145719	0.115035	0.24218	-0.2259	0.301794	0.314848	0.414097	0.393046	0.344634	0.104665	0.298909
Sig155	0.449643	0.20966	0.665026	0.596372	0.420075	0.314102	0.368837	0.128799	0.110584	0.0810841	0.488069	0.459886	0.314142	0.349269	0.392915	0.514148	0.0672473	0.598642	0.210614	0.321404	0.495736	0.0885116	0.567159	0.192771	0.233505	-0.147577	0.60507	0.612408	0.2294	0.348421	0.0625479	-0.155177	-0.146537	-0.434654	0.104431	-0.367859	0.208989	-0.323997	-0.0543581	0.156113	0.147037	-0.245481	0.355281	0.205627	0.634228	0.223128	0.34286	0.00365973	0.275588
Sig546	0.529669	0.286356	0.641817	0.10916	0.457417	0.455006	0.410343	0.223152	0.21616	0.179432	0.474061	0.500034	0.341094	0.388535	0.467331	0.520145	0.121782	0.424516	0.348067	0.319488	0.533824	0.066115	0.560496	0.216495	0.319295	-0.0720128	0.685198	0.542112	0.36485	0.421201	0.153995	-0.205335	-0.0520283	-0.454723	0.171779	-0.375216	0.255416	-0.290688	-0.0257278	0.164131	0.238987	-0.273942	0.311275	0.30013	0.427451	0.359546	0.342314	0.118284	0.315996
Sig403	0.46962	0.211321	0.72612	0.649273	0.436604	0.323591	0.386069	0.142406	0.114317	0.0707105	0.550293	0.469301	0.322387	0.36073	0.452397	0.534711	0.0744872	0.65164	0.223465	0.358607	0.52525	0.0904341	0.603961	0.202034	0.243833	-0.160083	0.68118	0.648568	0.238911	0.358755	0.085106	-0.170602	-0.139841	-0.459429	0.130681	-0.383377	0.243392	-0.347281	-0.0610048	0.18117	0.181102	-0.260259	0.36867	0.215796	0.6463	0.254307	0.342149	0.0324254	0.270723
Sig102	0.484113	0.295756	0.523802	0.21662	0.474826	0.331846	0.431724	0.261163	0.217162	0.217652	0.356041	0.486066	0.28049	0.448681	0.371237	0.459448	0.0913597	0.360857	0.339711	0.297706	0.496783	0.0518769	0.560014	0.160383	0.319091	0.0103847	0.560544	0.487103	0.374675	0.408326	0.198039	-0.160659	-0.0814428	-0.426962	0.151106	-0.376765	0.256963	-0.255437	-0.0251407	0.16682	0.227719	-0.267824	0.268299	0.314633	0.429427	0.306309	0.341006	0.037594	0.346904
Sig529	0.42611	0.256548	0.562308	0.157081	0.433516	0.336829	0.361826	0.156285	0.165561	0.138645	0.367424	0.453971	0.255248	0.342536	0.349757	0.486996	0.0937635	0.368636	0.276382	0.257432	0.478962	0.0642732	0.503385	0.160914	0.270668	-0.0976556	0.560695	0.458677	0.265132	0.342361	0.0897	-0.16839	-0.104398	-0.39156	0.105414	-0.341969	0.195391	-0.260548	-0.0172649	0.115999	0.161087	-0.242503	0.286183	0.249108	0.377614	0.261612	0.340346	0.0152424	0.303036
Sig451	0.538529	0.268777	0.691837	0.234012	0.478729	0.43464	0.429274	0.18537	0.167587	0.162415	0.477118	0.511221	0.330213	0.389267	0.453603	0.561868	0.108567	0.467244	0.342698	0.321872	0.57202	0.0726292	0.589945	0.20539	0.305918	-0.104017	0.689408	0.576162	0.343952	0.423508	0.0908526	-0.199532	-0.0873814	-0.451797	0.140691	-0.385937	0.239788	-0.297153	-0.0241509	0.138216	0.216766	-0.272446	0.351238	0.275879	0.475017	0.33375	0.339628	0.0507713	0.318463
Sig103	0.430244	0.218661	0.597518	0.116549	0.372801	0.372485	0.302576	0.148441	0.1445	0.133138	0.493024	0.400232	0.319776	0.305309	0.434547	0.428038	0.103528	0.448848	0.279832	0.263774	0.442634	0.0816661	0.471606	0.148671	0.241553	-0.130536	0.635055	0.493439	0.235301	0.376442	0.115796	-0.177025	-0.0887161	-0.398017	0.130326	-0.329794	0.211544	-0.276238	-0.0562658	0.122999	0.168339	-0.254632	0.254493	0.27048	0.399423	0.347824	0.339257	0.0960988	0.297598
Sig92	0.413287	0.184271	0.669074	0.62826	0.364029	0.271375	0.36745	0.111271	0.142811	0.0437556	0.634067	0.432349	0.308534	0.386156	0.426037	0.507788	0.0473637	0.792254	0.168331	0.36637	0.472071	0.0759332	0.548989	0.224833	0.176532	-0.145523	0.635727	0.59481	0.216535	0.344085	0.0726434	-0.134151	-0.159368	-0.405801	0.107375	-0.336059	0.218661	-0.307083	-0.0525393	0.159629	0.140338	-0.233156	0.338705	0.193923	0.619786	0.227986	0.339011	0.0581613	0.253873
Sig28	0.601462	0.287966	0.713928	0.373985	0.481982	0.502284	0.435085	0.189507	0.204298	0.133831	0.530627	0.529863	0.369267	0.425475	0.478445	0.571762	0.132598	0.557178	0.31502	0.362327	0.608401	0.122839	0.598091	0.241516	0.316511	-0.105074	0.73643	1	0.343609	0.448209	0.130093	-0.20081	-0.0507315	-0.472053	0.193709	-0.405416	0.282806	-0.333227	-0.0285379	0.19293	0.26153	-0.260722	0.377293	0.271194	0.549094	0.368422	0.337178	0.108129	0.280934
Sig415	0.492176	0.273556	0.555076	0.114057	0.460655	0.388604	0.421793	0.210535	0.192373	0.176691	0.427405	0.480009	0.341086	0.385795	0.425045	0.490991	0.11057	0.375098	0.32659	0.334383	0.510608	0.0637458	0.544171	0.207392	0.301531	-0.0642335	0.580709	0.470965	0.360756	0.433851	0.130704	-0.164811	-0.0509211	-0.393681	0.185594	-0.324655	0.284751	-0.262116	-0.00569308	0.191676	0.25143	-0.221921	0.268108	0.290995	0.407962	0.300132	0.337051	0.0884022	0.327508
Sig453	0.392273	0.217352	0.498027	0.126207	0.405033	0.274433	0.34024	0.135342	0.129199	0.151796	0.324801	0.405854	0.245164	0.318006	0.311957	0.429914	0.0810623	0.334262	0.318106	0.237762	0.443058	0.053575	0.443311	0.160229	0.240022	-0.0590318	0.521443	0.422577	0.243666	0.320391	0.0689473	-0.102729	-0.114116	-0.328848	0.0708933	-0.286517	0.163785	-0.187736	-0.0341625	0.0979321	0.139534	-0.214812	0.241475	0.227408	0.351774	0.246242	0.336685	0.0010708	0.305156
Sig297	0.298415	0.183508	0.419083	0.153327	0.334877	0.182727	0.275897	0.145537	0.111742	0.158177	0.250038	0.358072	0.19849	0.265088	0.237284	0.347881	0.0684521	0.28975	0.261495	0.196494	0.338546	0.0642913	0.394998	0.0717521	0.234282	-0.0549324	0.446446	0.36319	0.19132	0.218435	0.100648	-0.0734694	-0.152618	-0.31103	0.00456801	-0.282758	0.0970772	-0.179921	-0.0548452	0.0468356	0.0664027	-0.208347	0.221259	0.197727	0.340363	0.276834	0.3359	-0.0851326	0.335897
Sig163	0.491547	0.257002	0.562302	0.0675486	0.408369	0.446658	0.374206	0.187926	0.211279	0.141521	0.426808	0.464322	0.29872	0.366022	0.404943	0.482043	0.111081	0.378874	0.308502	0.264529	0.498761	0.0864723	0.49093	0.180602	0.309667	-0.048128	0.609729	0.489712	0.335181	0.381239	0.111544	-0.160433	-0.0229313	-0.380839	0.154058	-0.323642	0.232403	-0.232324	0.0194695	0.149636	0.233914	-0.213229	0.271159	0.267948	0.359953	0.336795	0.334285	0.0878076	0.279362
Sig407	0.250909	0.173178	0.390863	0.169349	0.260664	0.171063	0.310079	0.0879955	0.160301	0.117363	0.329568	0.333722	0.232899	0.246785	0.261841	0.33162	0.0773366	0.362711	0.204715	0.255654	0.345992	0.0646093	0.338253	0.119199	0.177697	-0.0315208	0.405701	0.342428	0.193356	0.239088	0.123293	-0.0429358	-0.136163	-0.199756	0.00860725	-0.176232	0.0960262	-0.122641	0.00706579	0.0580083	0.0585232	-0.131567	0.175147	0.157683	0.325396	0.208802	0.333501	-0.0360687	0.273415
Sig357	0.557668	0.301535	0.695525	0.309716	0.467925	0.444791	0.463867	0.205899	0.264582	0.169846	0.493312	0.533217	0.382584	0.422329	0.457369	0.557598	0.122461	0.499989	0.343428	0.369069	0.572565	0.0817658	0.604556	0.208135	0.311099	-0.0804038	0.693198	0.581466	0.394266	0.44224	0.132146	-0.204319	-0.0933029	-0.463534	0.156114	-0.401226	0.253994	-0.301438	-0.0165589	0.158326	0.235313	-0.271094	0.394016	0.278331	0.503274	0.371792	0.332028	0.0969986	0.289766
Sig244	0.452418	0.293669	0.615897	0.157856	0.374301	0.385236	0.383108	0.193822	0.264452	0.253784	0.448363	0.496759	0.277373	0.350012	0.414721	0.481672	0.109878	0.426425	0.426899	0.265746	0.517009	0.076766	0.517847	0.122618	0.318818	-0.013127	0.659604	0.53369	0.294493	0.34923	0.309321	-0.153773	-0.121569	-0.394026	0.0796896	-0.352789	0.161069	-0.19355	-0.0119351	0.0610898	0.158669	-0.260482	0.295493	0.277409	0.420332	0.399057	0.331746	0.0839882	0.274836
Sig326	0.48379	0.331406	0.563049	0.109089	0.450582	0.387927	0.434619	0.253204	0.216778	0.183555	0.397723	0.473282	0.319971	0.379497	0.441054	0.479973	0.130667	0.357131	0.375904	0.314814	0.517577	0.11087	0.511217	0.178993	0.297678	-0.0634245	0.600863	0.491727	0.346111	0.420597	0.111712	-0.172993	-0.0316508	-0.409036	0.166257	-0.351649	0.253144	-0.250368	-0.0201238	0.169121	0.233693	-0.251159	0.299568	0.287052	0.427966	0.319493	0.331466	0.067996	0.330843
Sig507	0.490466	0.258656	0.66792	0.327345	0.4251	0.387846	0.392821	0.169115	0.190729	0.129162	0.444025	0.506667	0.297513	0.382174	0.421355	0.529133	0.0863203	0.475212	0.299461	0.307667	0.554447	0.0842755	0.583138	0.186352	0.312045	-0.102211	0.65812	0.55062	0.302208	0.396804	0.0941287	-0.199474	-0.115772	-0.440314	0.134292	-0.383171	0.228047	-0.303875	-0.0309035	0.134235	0.19598	-0.276181	0.357405	0.260647	0.495684	0.298925	0.331235	0.0689949	0.283287
Sig336	0.34183	0.160708	0.594757	0.628825	0.355341	0.170161	0.319352	0.104343	0.0698882	0.0618926	0.411102	0.389078	0.237064	0.309949	0.302614	0.42541	0.0474291	0.542803	0.169345	0.276979	0.412303	0.0851429	0.505083	0.12638	0.18087	-0.143709	0.551265	0.529384	0.169853	0.274645	0.049496	-0.126512	-0.199398	-0.376364	0.0506276	-0.325005	0.167829	-0.282917	-0.0719641	0.127268	0.0762149	-0.222024	0.305586	0.170315	0.603245	0.187874	0.330122	-0.0708276	0.280136
Sig116	0.597593	0.320899	0.667791	0.0827171	0.465722	0.524271	0.442409	0.238524	0.250537	0.203242	0.494074	0.52872	0.370508	0.390754	0.502348	0.551524	0.162475	0.429568	0.427444	0.313392	0.584907	0.0793438	0.574984	0.228989	0.346378	-0.0572674	0.690738	0.552478	0.412459	0.469478	0.151331	-0.223947	-0.0122978	-0.464289	0.208442	-0.384849	0.276178	-0.29965	-0.0134587	0.173763	0.281077	-0.270821	0.323519	0.370484	0.411616	0.426606	0.329551	0.171903	0.278303
Sig503	0.460968	0.248446	0.63532	0.276614	0.424446	0.352823	0.383633	0.17482	0.168709	0.137607	0.409684	0.519724	0.27663	0.363145	0.387172	0.530783	0.100816	0.438119	0.297243	0.276693	0.548417	0.0668068	0.573455	0.165839	0.311048	-0.114057	0.64022	0.525678	0.306725	0.363287	0.0770871	-0.180627	-0.137584	-0.414195	0.0783089	-0.366202	0.171977	-0.283149	-0.0321055	0.0921729	0.149642	-0.264356	0.331734	0.240885	0.468317	0.302915	0.32945	0.0178308	0.300314
Sig505	0.485455	0.262446	0.650099	0.351585	0.43425	0.366667	0.422794	0.176895	0.191492	0.135019	0.430148	0.495334	0.321183	0.371201	0.398393	0.516018	0.0986899	0.467079	0.287169	0.327821	0.534548	0.077565	0.576174	0.205505	0.283182	-0.0930097	0.630677	0.565565	0.331725	0.387367	0.0801069	-0.17249	-0.102602	-0.426082	0.123865	-0.377352	0.221096	-0.284383	-0.0335122	0.133541	0.191513	-0.255865	0.367616	0.248628	0.496889	0.283187	0.329169	0.0517304	0.292502
Sig348	0.422927	0.235479	0.582176	0.238218	0.398356	0.341602	0.378865	0.140423	0.167937	0.119416	0.405193	0.44467	0.294234	0.325672	0.379985	0.461401	0.0863311	0.424849	0.264114	0.297265	0.486165	0.0655296	0.504868	0.174784	0.260742	-0.0977018	0.591648	0.487803	0.287417	0.370686	0.0989829	-0.14037	-0.109044	-0.377621	0.0935137	-0.321056	0.184079	-0.248502	-0.0296265	0.110879	0.149261	-0.233516	0.311654	0.251177	0.44052	0.27554	0.328834	0.0347235	0.29004
Sig499	0.311647	0.182997	0.431681	0.162257	0.320866	0.212851	0.304566	0.145958	0.161693	0.150687	0.321147	0.365564	0.218527	0.284799	0.261624	0.363795	0.0754576	0.329465	0.237857	0.219844	0.375029	0.0589833	0.394233	0.109526	0.209173	-0.0368201	0.478476	0.416446	0.205928	0.2888	0.126647	-0.0967612	-0.11816	-0.255622	0.0469585	-0.228164	0.135162	-0.144014	0.00569278	0.0857973	0.105071	-0.163641	0.220988	0.210119	0.354999	0.233321	0.328612	-0.0157737	0.28988
Sig7	0.443665	0.592949	0.455133	0.133855	0.481729	0.32228	1	0.310638	0.387837	0.240064	0.326459	0.466212	0.266809	0.381779	0.385801	0.458068	0.105894	0.331302	0.411293	0.260108	0.499279	0.0472123	0.475776	0.18082	0.313425	0.0928116	0.511363	0.435085	0.475124	0.421759	0.19386	-0.0794872	-0.0432812	-0.306224	0.12121	-0.319444	0.220761	-0.10813	0.0154067	0.121735	0.238319	-0.208024	0.257332	0.27367	0.35303	0.336145	0.327964	0.0536971	0.284923
Sig204	0.467899	0.269812	0.542672	0.130511	0.455223	0.354556	0.393034	0.248883	0.191705	0.170878	0.384841	0.450042	0.273937	0.368727	0.375181	0.451135	0.127959	0.3675	0.321161	0.279922	0.476695	0.0552791	0.502914	0.179372	0.298982	-0.0580482	0.578241	0.477677	0.351825	0.378916	0.136387	-0.161128	-0.0811118	-0.403738	0.133111	-0.344009	0.217203	-0.238942	0.0151798	0.139999	0.205003	-0.244336	0.276718	0.310118	0.399574	0.313662	0.325583	0.06502	0.328373
Sig105	0.384599	0.173149	0.614834	0.615003	0.375406	0.229692	0.350058	0.109078	0.0934289	0.0489153	0.467238	0.416331	0.273295	0.308708	0.374632	0.449271	0.0533136	0.568868	0.159974	0.317126	0.442154	0.0752248	0.522841	0.184539	0.18482	-0.141047	0.542644	0.547402	0.199061	0.302214	0.0534027	-0.119919	-0.166259	-0.384793	0.116988	-0.321508	0.233851	-0.287724	-0.0562272	0.17871	0.148275	-0.222697	0.30085	0.191045	0.581197	0.173732	0.324376	0.0147411	0.278009
Sig153	0.375813	0.172512	0.572818	0.444698	0.370853	0.267611	0.319903	0.0996257	0.0839849	0.069263	0.466235	0.383188	0.286395	0.307553	0.368838	0.441324	0.0421525	0.526469	0.16787	0.272831	0.421368	0.0859781	0.480221	0.170217	0.193195	-0.140665	0.531012	0.527666	0.173928	0.314192	0.072461	-0.138587	-0.128861	-0.379515	0.092907	-0.306563	0.176066	-0.288525	-0.05256	0.140417	0.112976	-0.221127	0.297844	0.183725	0.54302	0.188322	0.324306	0.0350139	0.261603
Sig307	0.243554	0.125344	0.386088	0.16854	0.271299	0.15385	0.189825	0.07439	0.075753	0.0746606	0.234294	0.282067	0.146206	0.23119	0.17179	0.297367	0.0566575	0.276334	0.171793	0.140646	0.303261	0.0599432	0.327036	0.0778445	0.170306	-0.0751506	0.389579	0.331753	0.12505	0.180815	0.051952	-0.0768944	-0.143652	-0.237711	-0.0251315	-0.214878	0.0662398	-0.142827	-0.0382815	0.0387751	0.0219412	-0.175173	0.180657	0.163267	0.311468	0.195038	0.323989	-0.0888756	0.284922
Sig474	0.467546	0.231501	0.631355	0.280942	0.397829	0.374331	0.377915	0.150518	0.177906	0.145301	0.440857	0.484651	0.270187	0.329142	0.393759	0.509618	0.0902787	0.45454	0.284555	0.265717	0.506347	0.0737004	0.539371	0.194312	0.267397	-0.108114	0.617911	0.530187	0.28692	0.373056	0.120291	-0.18771	-0.101317	-0.408395	0.11725	-0.351343	0.206796	-0.279393	-0.0257904	0.126014	0.171964	-0.242467	0.312771	0.241854	0.463514	0.289849	0.323246	0.0647836	0.266178
Sig266	0.400069	0.163684	0.663481	0.659342	0.38973	0.242626	0.324388	0.109496	0.0717357	0.0549363	0.452926	0.425775	0.270228	0.332953	0.339448	0.47853	0.0522094	0.59281	0.181027	0.322551	0.456732	0.0929208	0.559617	0.160028	0.197681	-0.171372	0.59359	0.581637	0.186698	0.292759	0.0358307	-0.158031	-0.186435	-0.402673	0.0644352	-0.340684	0.176628	-0.308185	-0.0626941	0.124661	0.109177	-0.23566	0.342029	0.167236	0.61112	0.194673	0.323089	-0.0238963	0.251794
Sig230	0.356873	0.255642	0.40811	0.16575	0.373661	0.222241	0.409539	0.190685	0.24011	0.212169	0.293159	0.402986	0.226757	0.369343	0.313722	0.374177	0.0835165	0.309377	0.315665	0.244393	0.385949	0.0385048	0.428639	0.128428	0.264926	0.0487325	0.450756	0.370847	0.353564	0.344346	0.181684	-0.0976799	-0.0451041	-0.314033	0.0897816	-0.272598	0.191356	-0.182703	-0.0270105	0.120622	0.160361	-0.199643	0.199406	0.262514	0.365099	0.272418	0.32197	0.00515885	0.325611
Sig55	0.311928	0.389175	0.294339	-0.0131722	0.29087	0.236488	0.454173	0.260776	0.330053	0.257438	0.0883218	0.390821	0.154116	0.235809	0.198322	0.321267	0.132034	0.119082	0.438024	0.15367	0.395219	0.0296411	0.298742	0.0398346	0.256424	0.176499	0.374656	0.31924	0.349552	0.199413	0.169882	0.0828924	-0.0754509	-0.109053	-0.0708555	-0.225077	0.0333476	0.0882878	0.0307647	-0.0539082	0.114474	-0.118354	0.18588	0.145629	0.206831	0.368827	0.321086	-0.166604	0.256954
Sig184	0.608428	0.319054	0.688711	0.205823	0.511232	0.496229	0.463304	0.232418	0.250199	0.210121	0.496825	0.558495	0.371654	0.4417	0.496372	0.576596	0.138228	0.453317	0.3966	0.34515	0.603422	0.0578191	0.62245	0.240561	0.354441	-0.0574301	0.695147	0.613445	0.407974	0.486398	0.167127	-0.232059	-0.0402209	-0.46769	0.222824	-0.388233	0.300884	-0.320767	-0.000376253	0.202749	0.303513	-0.265392	0.355488	0.307104	0.474558	0.385412	0.320033	0.171751	0.302075
Sig173	0.473936	0.225528	0.671379	0.389516	0.431987	0.366929	0.376433	0.160185	0.134739	0.11533	0.494361	0.485147	0.30739	0.361685	0.426602	0.528933	0.0884301	0.521856	0.24817	0.332702	0.5279	0.0838152	0.575306	0.242964	0.259374	-0.137659	0.63926	0.562759	0.277595	0.384815	0.0651064	-0.19449	-0.104305	-0.442174	0.134612	-0.375599	0.224431	-0.325893	-0.0366459	0.154155	0.185532	-0.251935	0.356187	0.222271	0.531456	0.273151	0.3175	0.0535802	0.275958
Sig88	0.426418	0.2448	0.476192	0.12931	0.401326	0.330504	0.386374	0.198123	0.189245	0.368996	0.323591	0.51179	0.257923	0.877868	0.322503	0.412064	0.123073	0.339739	0.309467	0.30725	0.450873	0.0723841	0.463921	0.156445	0.29465	0.0703628	0.520285	0.451399	0.336854	0.350766	0.214125	-0.113993	-0.063925	-0.334861	0.115053	-0.247397	0.195289	-0.175864	0.0450018	0.124284	0.181562	-0.169473	0.246402	0.267146	0.357716	0.300432	0.316491	0.0402344	0.316382
Sig519	0.350988	0.217616	0.395633	0.0936147	0.384837	0.222964	0.349029	0.221858	0.157506	0.185143	0.230967	0.371304	0.221494	0.323325	0.258265	0.357037	0.0885701	0.230747	0.281445	0.257018	0.378253	0.0928596	0.430395	0.0979454	0.261613	0.000484923	0.431532	0.362979	0.273032	0.287627	0.139843	-0.0875924	-0.097736	-0.304586	0.0638904	-0.271666	0.156422	-0.157476	-0.00777131	0.0872893	0.13575	-0.199112	0.230322	0.239454	0.322283	0.240553	0.313494	-0.0275708	0.306506
Sig233	0.5237	0.263422	0.667108	0.267603	0.462142	0.432075	0.404328	0.185209	0.173361	0.135984	0.457963	0.500301	0.333076	0.361616	0.456429	0.547454	0.107639	0.464589	0.30261	0.32238	0.54965	0.0776875	0.577424	0.224701	0.307452	-0.0974229	0.662006	0.576444	0.343164	0.428345	0.0922521	-0.213317	-0.0495847	-0.453008	0.186714	-0.392987	0.27834	-0.312356	-0.0424438	0.197239	0.269796	-0.262616	0.334354	0.251572	0.474955	0.313099	0.313397	0.0938608	0.276377
Sig455	0.350602	0.237125	0.447427	0.10914	0.358369	0.27921	0.349467	0.125251	0.140001	0.129451	0.275313	0.39643	0.231372	0.318898	0.267486	0.41231	0.0744517	0.282241	0.254441	0.22634	0.423029	0.0764217	0.39856	0.126419	0.239213	-0.0169009	0.462822	0.40107	0.250856	0.286438	0.103282	-0.100793	-0.0827235	-0.300494	0.0637591	-0.273185	0.152816	-0.164367	-0.0139529	0.099602	0.137691	-0.195519	0.228999	0.222448	0.32644	0.253273	0.31302	-0.0231291	0.280902
Sig104	0.397497	0.273053	0.431025	-0.0533575	0.363443	0.346959	0.354143	0.204696	0.232773	0.237244	0.327441	0.394672	0.255604	0.338005	0.344923	0.378007	0.0872951	0.259776	0.368272	0.226558	0.413812	0.0258085	0.410003	0.132272	0.27633	0.0155257	0.504415	0.376344	0.351061	0.348687	0.216009	-0.140334	-0.0377605	-0.343583	0.149628	-0.280231	0.210941	-0.179943	-0.0087367	0.127855	0.203336	-0.209346	0.195686	0.324117	0.280335	0.355002	0.312412	0.102336	0.289485
Sig98	0.519922	0.294909	0.624576	0.332195	0.434285	0.422151	0.467276	0.236784	0.241718	0.306766	0.419285	0.579373	0.311535	0.586076	0.418331	0.515829	0.128008	0.455478	0.367346	0.343586	0.56054	0.0853911	0.563635	0.228227	0.326658	0.0413041	0.618588	0.571192	0.392389	0.416414	0.240468	-0.149199	-0.061069	-0.391794	0.148794	-0.325128	0.233736	-0.223996	0.089622	0.131514	0.233431	-0.201395	0.331193	0.268437	0.4826	0.344965	0.311704	0.0792488	0.271654
Sig158	0.381016	0.216177	0.454248	0.00208012	0.342879	0.345611	0.317216	0.141289	0.148935	0.141533	0.347575	0.357018	0.240804	0.27958	0.315729	0.379327	0.0951808	0.30398	0.2632	0.212173	0.386998	0.0776619	0.375503	0.152776	0.244337	-0.0283528	0.503876	0.377954	0.281621	0.305733	0.109871	-0.112559	-0.0271147	-0.312766	0.103664	-0.26613	0.170377	-0.176539	0.0179171	0.11063	0.167467	-0.197761	0.219631	0.204858	0.303623	0.297748	0.309648	0.0467282	0.256925
Sig555	0.228005	0.244985	0.287421	0.0557122	0.250658	0.14951	0.253302	0.110895	0.205093	0.125763	0.195858	0.288001	0.169582	0.264777	0.193124	0.246669	0.0815068	0.203162	0.18919	0.173688	0.273461	0.043086	0.284264	0.0891742	0.170999	-0.00895018	0.331261	0.276034	0.178594	0.208382	0.106025	-0.0380343	-0.105447	-0.20139	0.0233204	-0.173133	0.111905	-0.0873093	0.0038759	0.0599522	0.081078	-0.153597	0.151286	0.183631	0.225662	0.162079	0.309467	-0.0151125	0.273414
Sig14	0.392249	0.238382	0.448082	0.138289	0.383789	0.300244	0.381779	0.192209	0.180189	0.370798	0.296158	0.491731	0.240215	1	0.293911	0.387528	0.116958	0.325058	0.289982	0.308463	0.444769	0.0607966	0.450585	0.152091	0.285393	0.0560087	0.484127	0.425475	0.318845	0.334262	0.197792	-0.107749	-0.0681456	-0.312865	0.0996939	-0.237396	0.180629	-0.168713	0.0572956	0.112395	0.167448	-0.164281	0.251904	0.263949	0.350419	0.277792	0.308461	0.0290279	0.310482
Sig264	0.425419	0.22279	0.473866	0.124042	0.439388	0.334999	0.36175	0.179806	0.149183	0.138945	0.421747	0.367599	0.363299	0.380454	0.404599	0.386167	0.119823	0.352345	0.266074	0.340656	0.394164	0.0446112	0.447388	0.183163	0.265904	-0.0384836	0.502152	0.41297	0.302342	0.418592	0.137365	-0.14963	0.0227156	-0.381461	0.222431	-0.306853	0.316023	-0.249704	-0.0332862	0.214196	0.279427	-0.222837	0.238977	0.272671	0.365752	0.258132	0.30837	0.105195	0.317608
Sig78	0.429527	0.516748	0.435361	0.0363074	0.386769	0.322049	0.562471	0.352269	0.328881	0.23466	0.290053	0.462111	0.229749	0.322776	0.335478	0.410742	0.104169	0.268125	0.388038	0.222472	0.481984	0.0366902	0.439441	0.129021	0.305281	0.0625089	0.508195	0.396206	0.407663	0.358903	0.200554	-0.0584759	-0.058142	-0.258176	0.0939704	-0.301499	0.18366	-0.0910035	0.0252757	0.0757636	0.216801	-0.20638	0.234038	0.260525	0.303974	0.350985	0.307652	0.0510673	0.252019
Sig355	0.361495	0.185829	0.49485	0.218661	0.351284	0.25199	0.305854	0.134302	0.14022	0.124589	0.297289	0.402089	0.211242	0.28024	0.275043	0.401724	0.0768157	0.329975	0.248409	0.226233	0.419329	0.0658044	0.438812	0.104308	0.244701	-0.0868141	0.499436	0.410119	0.240117	0.269645	0.0683565	-0.118424	-0.138661	-0.335974	0.039306	-0.293788	0.128647	-0.206263	-0.0428014	0.0657922	0.104965	-0.211421	0.263172	0.200204	0.389431	0.225938	0.306798	-0.0395384	0.287329
Sig375	0.449819	0.274294	0.558388	0.193522	0.460023	0.298149	0.405636	0.199044	0.132561	0.152076	0.350533	0.458384	0.258862	0.342936	0.381619	0.480869	0.0931385	0.367285	0.311267	0.28087	0.492438	0.0796628	0.539424	0.133515	0.279613	-0.0859871	0.574275	0.457153	0.291319	0.372817	0.0849905	-0.158431	-0.0994908	-0.388132	0.102087	-0.342046	0.193117	-0.245273	-0.0452138	0.109522	0.198478	-0.250236	0.289702	0.262813	0.427415	0.259802	0.30515	0.0253976	0.310944
Sig541	0.515805	0.281569	0.610392	0.269966	0.480452	0.405307	0.437303	0.218537	0.198174	0.159661	0.428377	0.482053	0.320238	0.392115	0.439106	0.518143	0.11738	0.427113	0.311045	0.330116	0.525343	0.0840835	0.573321	0.231956	0.300147	-0.0750425	0.618762	0.535326	0.362169	0.424991	0.107417	-0.181426	-0.0510311	-0.460334	0.190466	-0.382645	0.280232	-0.306578	-0.0316198	0.188109	0.259564	-0.261189	0.314555	0.281811	0.47665	0.297049	0.302119	0.0991288	0.293206
Sig19	0.343679	0.354803	0.338319	-0.034848	0.321154	0.239725	0.411293	0.276218	0.326221	0.486464	0.20037	0.422371	0.177372	0.289982	0.356748	0.334498	0.188573	0.165501	1	0.173809	0.446823	0.0457311	0.343997	0.057088	0.334736	0.132155	0.409396	0.31502	0.335425	0.272457	0.304934	-0.0283563	-0.0645083	-0.196183	0.0398073	-0.227109	0.110715	0.00217601	0.0258226	0.017351	0.146847	-0.160633	0.166984	0.241237	0.23493	0.332746	0.301989	-0.0041081	0.279187
Sig562	0.510201	0.265927	0.612181	0.102834	0.416779	0.461729	0.37764	0.176455	0.221224	0.211234	0.450176	0.507	0.302054	0.362741	0.427587	0.525897	0.114633	0.419303	0.339019	0.282375	0.524657	0.0901124	0.523587	0.21675	0.30183	-0.0536655	0.626159	0.503984	0.33365	0.410434	0.126664	-0.193354	-0.0252056	-0.406409	0.166069	-0.353044	0.236681	-0.260242	-0.0153334	0.150573	0.23081	-0.238571	0.296722	0.308193	0.380953	0.350642	0.301641	0.116097	0.255632
Sig167	0.34515	0.219163	0.443472	0.150231	0.371001	0.261603	0.340174	0.149088	0.139345	0.126302	0.271704	0.356304	0.209736	0.291323	0.268968	0.369152	0.104806	0.284529	0.257046	0.232678	0.385034	0.0773908	0.417308	0.137303	0.238582	-0.0572703	0.452261	0.381597	0.248631	0.286166	0.0663041	-0.112061	-0.078235	-0.321223	0.0820488	-0.295047	0.171812	-0.199467	-0.0396245	0.0934698	0.153521	-0.208103	0.260761	0.217171	0.345298	0.224654	0.300506	-0.0238633	0.280851
Sig294	0.29635	0.167715	0.417737	0.116256	0.280476	0.247575	0.254213	0.107735	0.138971	0.0981865	0.269234	0.324751	0.180784	0.243091	0.223357	0.327353	0.0559277	0.29105	0.204999	0.186765	0.340034	0.0526473	0.339648	0.0653538	0.179363	-0.0674753	0.433943	0.364701	0.184992	0.214453	0.0558031	-0.083838	-0.106216	-0.264483	0.0419686	-0.248077	0.129727	-0.158949	-0.0378951	0.0973468	0.0762069	-0.170628	0.213477	0.163104	0.299334	0.25951	0.299822	-0.0432438	0.254188
Sig532	0.36928	0.193115	0.523363	0.256304	0.365117	0.231233	0.341543	0.144733	0.119908	0.124119	0.341312	0.40535	0.215102	0.289751	0.309168	0.436776	0.0727226	0.378761	0.243813	0.228446	0.42798	0.0558754	0.487162	0.112006	0.22353	-0.0949637	0.522359	0.43421	0.222624	0.307225	0.0794461	-0.137591	-0.142044	-0.350147	0.0643752	-0.298595	0.150243	-0.23378	-0.0275584	0.0853183	0.119038	-0.217595	0.274632	0.221902	0.416641	0.233483	0.298607	-0.00272712	0.276281
Sig385	0.519984	0.273247	0.625864	0.410843	0.455668	0.390015	0.439786	0.200589	0.205195	0.141376	0.477199	0.49711	0.334674	0.410501	0.443523	0.519233	0.093794	0.512434	0.299026	0.351814	0.539098	0.11016	0.600423	0.258083	0.303963	-0.086265	0.62425	0.583537	0.379539	0.451865	0.121828	-0.183094	-0.0581971	-0.455163	0.196677	-0.38676	0.287904	-0.31272	0.0117504	0.2056	0.249084	-0.254898	0.344325	0.267556	0.543868	0.28275	0.29732	0.108487	0.263678
Sig513	0.522148	0.313765	0.550565	0.0922489	0.480905	0.427015	0.42228	0.244314	0.23654	0.177845	0.419136	0.461822	0.319646	0.397548	0.438245	0.48952	0.127206	0.368565	0.344359	0.326823	0.496275	0.0696205	0.509303	0.232837	0.330688	-0.026648	0.585146	0.4811	0.417884	0.437822	0.157623	-0.192472	-0.0051929	-0.420117	0.234961	-0.349159	0.318013	-0.265126	0.0261488	0.233198	0.296979	-0.240184	0.281104	0.314474	0.379959	0.327224	0.297228	0.136932	0.300117
Sig481	0.37161	0.173445	0.544398	0.493482	0.363428	0.244281	0.309186	0.137942	0.099346	0.0598402	0.393825	0.385195	0.246018	0.316143	0.322362	0.433173	0.0656184	0.500375	0.181504	0.302823	0.409751	0.0916892	0.486808	0.178716	0.203373	-0.117436	0.518544	0.497182	0.202949	0.290987	0.0331207	-0.130554	-0.122551	-0.362743	0.098676	-0.307604	0.209807	-0.264611	-0.0425496	0.165196	0.144815	-0.200098	0.314544	0.167982	0.550643	0.186639	0.296912	-0.0253935	0.259367
Sig111	0.315583	0.160961	0.471174	0.515869	0.356127	0.153046	0.321688	0.118738	0.0851763	0.0845791	0.318352	0.361358	0.219011	0.318127	0.260906	0.370902	0.0589477	0.431223	0.160242	0.261079	0.367462	0.0676432	0.485336	0.121961	0.190276	-0.0971847	0.446113	0.441592	0.213598	0.253624	0.0480435	-0.0983583	-0.159518	-0.348098	0.0518702	-0.297328	0.156292	-0.244177	-0.0483541	0.112212	0.0959498	-0.206907	0.27436	0.179225	0.489266	0.149325	0.292302	-0.0596465	0.278974
Sig108	0.446694	0.266317	0.51987	-0.0156059	0.396297	0.381231	0.360126	0.191335	0.268899	0.177525	0.376649	0.42765	0.269509	0.321675	0.385016	0.424015	0.121559	0.317058	0.34443	0.239983	0.450537	0.0399891	0.462048	0.172035	0.291084	-0.0322772	0.564865	0.427191	0.33911	0.37043	0.183396	-0.169599	-0.0336927	-0.37822	0.135396	-0.312515	0.19891	-0.225236	-0.0118699	0.113601	0.192872	-0.234836	0.239077	0.267929	0.306581	0.400881	0.291554	0.121176	0.276161
Sig446	0.263147	0.179018	0.292123	0.00513628	0.305083	0.19691	0.30519	0.121586	0.121842	0.158998	0.206966	0.285625	0.188411	0.245227	0.202782	0.263004	0.0703431	0.197449	0.22619	0.168687	0.291043	0.0350001	0.303031	0.0860204	0.197407	-0.00260574	0.344466	0.261645	0.243799	0.251003	0.0906637	-0.064456	-0.0631959	-0.226812	0.0471847	-0.200481	0.133091	-0.111229	0.0116263	0.0715555	0.108447	-0.144523	0.141369	0.186188	0.215406	0.190091	0.288885	-0.0422307	0.283396
Sig470	0.387191	0.229473	0.456274	0.151492	0.387351	0.289632	0.337254	0.156372	0.1918	0.151643	0.319503	0.400197	0.249402	0.316686	0.302834	0.39571	0.0920667	0.334003	0.26864	0.261109	0.411197	0.0897629	0.418431	0.177678	0.254127	-0.0427222	0.482384	0.404914	0.310476	0.310698	0.104773	-0.127437	-0.0465208	-0.332426	0.114844	-0.244685	0.204965	-0.215874	0.0285152	0.147058	0.156508	-0.154837	0.262712	0.228785	0.363711	0.266544	0.288826	0.0213907	0.291664
Sig479	0.53023	0.247074	0.600729	0.20002	0.445747	0.45666	0.393559	0.182937	0.176997	0.135799	0.486886	0.465269	0.362809	0.37632	0.44238	0.515008	0.101853	0.448154	0.278965	0.357074	0.526192	0.120005	0.528641	0.264925	0.281163	-0.0729807	0.627898	0.538637	0.331575	0.462535	0.110476	-0.16635	0.00100059	-0.424279	0.230227	-0.35509	0.318832	-0.290294	-0.0106149	0.245541	0.291148	-0.239768	0.292819	0.298151	0.451353	0.292718	0.288485	0.140503	0.264013
Sig232	0.357265	0.247001	0.412847	0.194732	0.363848	0.254072	0.316567	0.214408	0.155084	0.142091	0.321663	0.356068	0.255738	0.312801	0.341315	0.353525	0.0578506	0.311231	0.294239	0.250433	0.371619	0.0486866	0.412181	0.143521	0.211354	-0.00903471	0.442823	0.392502	0.272385	0.344068	0.122303	-0.104248	-0.018454	-0.311299	0.142015	-0.262439	0.230999	-0.200563	-0.02014	0.178195	0.1874	-0.143896	0.203465	0.241279	0.355244	0.202962	0.286348	0.0264992	0.284562
Sig323	0.551645	0.247824	0.57211	0.130094	0.472285	0.413403	0.397416	0.188899	0.190875	0.142209	0.420498	0.457368	0.296635	0.372029	0.42427	0.466462	0.108557	0.384727	0.30169	0.284587	0.487682	0.0821926	0.49082	0.216166	0.269704	-0.0732832	0.59625	0.493482	0.34574	0.429507	0.0977664	-0.142167	-0.0171431	-0.414808	0.187849	-0.333564	0.270443	-0.269629	-0.0204752	0.159339	0.266138	-0.216955	0.281548	0.258048	0.460932	0.300226	0.286347	0.10039	0.272919
Sig188	0.648254	0.311742	0.714748	0.082468	0.455491	0.617808	0.413406	0.187216	0.218573	0.139165	0.591268	0.513713	0.390018	0.37561	0.575714	0.55585	0.134694	0.493008	0.347392	0.311252	0.575583	0.0865013	0.551013	0.250681	0.29404	-0.0932127	0.749349	0.602644	0.374116	0.489236	0.122504	-0.271446	0.0637477	-0.463991	0.269353	-0.366717	0.312213	-0.323936	-0.027773	0.21656	0.318285	-0.235655	0.326941	0.285606	0.416947	0.406774	0.284879	0.23019	0.219751
Sig228	0.334174	0.217003	0.357778	0.116707	0.342618	0.206257	0.368731	0.206967	0.216689	0.165847	0.259292	0.346243	0.210094	0.312857	0.303646	0.324741	0.0831573	0.25916	0.296446	0.229079	0.354427	0.00934261	0.382436	0.12572	0.223199	0.0284047	0.406805	0.339528	0.318042	0.320147	0.173966	-0.0906926	-0.068104	-0.298162	0.102354	-0.258035	0.190673	-0.164565	-0.0266325	0.11928	0.163529	-0.193116	0.169992	0.240572	0.321451	0.233457	0.284368	0.0312079	0.296921
Sig409	0.296244	0.231441	0.382407	0.127134	0.280811	0.223426	0.426779	0.16717	0.249536	0.17319	0.309084	0.374524	0.226055	0.297646	0.288074	0.358087	0.0751733	0.303363	0.276242	0.228177	0.38567	0.0482658	0.377305	0.142296	0.231221	0.0343835	0.411146	0.336765	0.308642	0.304103	0.170556	-0.0156322	-0.101883	-0.203579	0.0386058	-0.229271	0.12279	-0.0630473	0.0110062	0.063791	0.118914	-0.167123	0.186077	0.187809	0.302387	0.230588	0.283876	0.0124491	0.241511
Sig312	0.48413	0.241963	0.611558	0.406224	0.372963	0.388437	0.389506	0.148854	0.216809	0.151626	0.475801	0.473252	0.306786	0.368128	0.427013	0.501556	0.0996804	0.519971	0.266712	0.330039	0.49876	0.0962579	0.542405	0.242004	0.270415	-0.0592367	0.597612	0.553122	0.338799	0.391895	0.166536	-0.178429	-0.0828927	-0.406546	0.148523	-0.342254	0.231018	-0.283452	0.0188862	0.153943	0.198565	-0.225109	0.305782	0.235751	0.490161	0.280582	0.283723	0.131292	0.233553
Sig438	0.0343545	0.0452785	0.219022	0.186342	0.145597	-0.096633	0.113808	0.0444222	-0.0021639	0.0662285	0.0652151	0.154573	0.0405598	0.139955	0.00674701	0.147326	-0.00638269	0.156669	0.101523	0.0767148	0.143221	-0.00293782	0.205215	-0.065598	0.0647959	-0.0552779	0.213909	0.164198	-9.06237e-05	0.0203216	0.027582	0.0346001	-0.254874	-0.1124	-0.145339	-0.119197	-0.0551334	-0.0450337	-0.0499975	-0.0612882	-0.123589	-0.130116	0.112421	0.0688233	0.233907	0.0450902	0.283639	-0.200831	0.266821
Sig511	0.527875	0.29727	0.519769	0.0352563	0.463159	0.439622	0.421178	0.244242	0.279816	0.178925	0.367835	0.459954	0.295834	0.380899	0.4141	0.469542	0.135165	0.315253	0.349103	0.287744	0.486663	0.0608879	0.489794	0.198565	0.345672	-0.00130301	0.563824	0.465649	0.412919	0.426556	0.152681	-0.16902	0.0104906	-0.384077	0.209004	-0.331173	0.28375	-0.229204	0.0052517	0.179743	0.293665	-0.215651	0.274192	0.305104	0.348276	0.361459	0.283046	0.134314	0.277152
Sig243	0.368928	0.217805	0.406164	0.00829714	0.36908	0.293538	0.337719	0.156342	0.125713	0.156992	0.268933	0.334077	0.221488	0.286938	0.290821	0.337585	0.0923135	0.238804	0.257478	0.221839	0.348482	0.0636445	0.376552	0.129673	0.253246	-0.0555111	0.443721	0.336269	0.270882	0.313822	0.0827141	-0.132102	-0.0341996	-0.326358	0.11682	-0.264565	0.182387	-0.197021	-0.00618066	0.113513	0.166663	-0.190325	0.200961	0.286804	0.283002	0.267568	0.282567	0.0382769	0.302171
Sig440	0.395074	0.259694	0.449938	0.135633	0.360745	0.302733	0.38662	0.187059	0.23806	0.219696	0.315998	0.429791	0.28921	0.395389	0.328938	0.416434	0.114627	0.33949	0.29584	0.308135	0.456689	0.0716802	0.434273	0.17453	0.292317	0.0351192	0.485964	0.419523	0.34892	0.337771	0.167635	-0.115907	-0.0627879	-0.305234	0.106778	-0.271574	0.189638	-0.170463	0.0144259	0.117225	0.176576	-0.194613	0.27875	0.22451	0.339729	0.29515	0.28219	0.0577377	0.274012
Sig16	0.571888	0.288112	0.690407	0.219573	0.447912	0.483312	0.458068	0.188229	0.24667	0.153331	0.535294	0.682515	0.33282	0.387528	0.48189	1	0.108675	0.505759	0.334498	0.32449	0.683405	0.0914964	0.692072	0.255458	0.304502	-0.0745973	0.67112	0.571762	0.387702	0.454459	0.110569	-0.220528	-0.0216674	-0.422198	0.200495	-0.361391	0.276933	-0.285792	0.0113275	0.172588	0.274582	-0.234726	0.364081	0.297981	0.4443	0.354161	0.281081	0.147154	0.23616
Sig162	0.338877	0.202919	0.394366	0.124176	0.371818	0.228701	0.337567	0.157933	0.111928	0.152853	0.246962	0.379967	0.19746	0.277203	0.256239	0.368249	0.0828176	0.257201	0.247122	0.229234	0.384914	0.0389132	0.410855	0.0955686	0.256326	-0.0234127	0.423275	0.339376	0.238043	0.267829	0.108468	-0.110374	-0.0806069	-0.297908	0.0839922	-0.258944	0.169226	-0.182508	-0.0231705	0.100208	0.175313	-0.18828	0.21131	0.211777	0.318962	0.20615	0.279059	-0.0236821	0.285618
Sig571	0.441514	0.243473	0.46317	0.2251	0.421123	0.306053	0.380652	0.230165	0.173574	0.161835	0.320891	0.389812	0.248305	0.346425	0.332272	0.397355	0.113417	0.334309	0.283199	0.279901	0.425553	0.0345081	0.507331	0.169165	0.255731	-0.0467945	0.480888	0.444899	0.318035	0.377361	0.106271	-0.152324	-0.0573105	-0.372985	0.156434	-0.319421	0.244508	-0.239842	-0.0157869	0.170106	0.212687	-0.217986	0.24637	0.251448	0.390424	0.226339	0.277851	0.056854	0.285375
Sig331	0.35855	0.275474	0.383841	-0.0549025	0.437836	0.268413	0.393366	0.200973	0.139862	0.194093	0.255176	0.343362	0.207482	0.30275	0.309501	0.331638	0.0831505	0.202705	0.306357	0.199898	0.359636	0.0309617	0.376619	0.0982484	0.288471	-0.0112204	0.438465	0.31785	0.323401	0.321241	0.126578	-0.129018	-0.0574725	-0.313376	0.0989503	-0.256178	0.159738	-0.180655	-0.0125526	0.0852638	0.191614	-0.196608	0.194983	0.319835	0.24982	0.282289	0.276246	0.0256181	0.300601
Sig212	0.401495	0.213369	0.595324	0.585328	0.371452	0.254924	0.361064	0.135673	0.145114	0.107915	0.396274	0.426717	0.25672	0.350573	0.333119	0.448087	0.0628712	0.504587	0.217279	0.298587	0.446511	0.0786264	0.53108	0.173065	0.246384	-0.0662328	0.536026	0.550027	0.244888	0.303702	0.125646	-0.13308	-0.141188	-0.386776	0.0917228	-0.337072	0.190087	-0.255724	-0.028695	0.12407	0.142668	-0.220064	0.334827	0.206055	0.547436	0.198888	0.275455	0.00787123	0.230662
Sig236	0.383315	0.192537	0.519243	0.373871	0.348671	0.278212	0.316177	0.127127	0.139497	0.102051	0.401628	0.39971	0.244156	0.302794	0.352441	0.407307	0.0394931	0.423485	0.212184	0.277948	0.434481	0.0579167	0.461403	0.195664	0.21804	-0.100717	0.499329	0.470472	0.227847	0.340526	0.0887907	-0.140449	-0.0817884	-0.349286	0.134303	-0.293158	0.212632	-0.244801	-0.00794331	0.150984	0.177027	-0.160457	0.262812	0.189411	0.47026	0.198301	0.275278	0.0591397	0.222298
Sig330	0.319503	0.156931	0.454103	0.47486	0.311795	0.199613	0.307229	0.117558	0.160909	0.124405	0.308677	0.348925	0.226348	0.305922	0.27295	0.339815	0.0463861	0.42278	0.198563	0.273579	0.355351	0.0690503	0.415631	0.162578	0.203466	-0.0648505	0.419745	0.430472	0.209523	0.254817	0.0860253	-0.0760082	-0.128861	-0.299708	0.0607362	-0.265577	0.158693	-0.195736	-0.0278614	0.117177	0.100444	-0.185702	0.224495	0.183901	0.463033	0.163087	0.274898	-0.0368959	0.253644
Sig255	0.306206	0.23014	0.326433	0.017284	0.346647	0.20097	0.3094	0.17728	0.153094	0.244706	0.200888	0.315858	0.214688	0.301301	0.250147	0.295117	0.132038	0.180006	0.316892	0.236573	0.343644	0.0330817	0.351993	0.0743322	0.308457	0.0367983	0.383606	0.302383	0.243921	0.241001	0.156002	-0.0811256	-0.0790118	-0.278168	0.065495	-0.238199	0.152106	-0.139242	-0.0186764	0.0887846	0.132442	-0.175135	0.165347	0.244203	0.260182	0.224889	0.274829	-0.0138916	0.292004
Sig300	0.256457	0.167955	0.330942	0.0538241	0.294549	0.169275	0.242227	0.120584	0.12196	0.191377	0.205253	0.308694	0.173121	0.304232	0.20132	0.277187	0.0680512	0.196294	0.22526	0.191901	0.285	0.0316664	0.337352	0.0560015	0.191032	-0.0202385	0.346086	0.284312	0.213017	0.21583	0.116263	-0.0696199	-0.0924239	-0.227475	0.0601366	-0.20022	0.135806	-0.126616	0.00205751	0.0939647	0.10678	-0.157294	0.16075	0.180848	0.245351	0.205924	0.271281	-0.0146698	0.277719
Sig334	0.385492	0.165136	0.590933	0.63268	0.347775	0.218694	0.306819	0.118044	0.0710145	0.0702747	0.388848	0.383541	0.243781	0.307088	0.315533	0.422196	0.0531683	0.515815	0.181663	0.301757	0.410097	0.0946114	0.501761	0.158135	0.202171	-0.113518	0.526269	0.522555	0.186359	0.277188	0.0581246	-0.146013	-0.14608	-0.376082	0.0897045	-0.327133	0.193642	-0.284914	-0.0585424	0.134553	0.126524	-0.210808	0.299661	0.163484	0.58169	0.177651	0.270907	-0.0251951	0.234082
Sig206	0.48785	0.24953	0.563465	0.253435	0.440425	0.374486	0.386346	0.188073	0.144336	0.153995	0.369337	0.462198	0.288924	0.344312	0.374246	0.471557	0.130133	0.364841	0.293904	0.308114	0.467257	0.0810109	0.522866	0.165832	0.307607	-0.0633114	0.551417	0.498935	0.325232	0.37073	0.0859934	-0.182784	-0.0517873	-0.414385	0.156584	-0.357252	0.232422	-0.28177	-0.0350299	0.151681	0.214298	-0.231872	0.29891	0.227595	0.420547	0.271277	0.270787	0.0602883	0.267805
Sig169	0.46806	0.237342	0.555559	0.226878	0.444984	0.37147	0.382448	0.16996	0.145059	0.123276	0.363188	0.459973	0.307385	0.350948	0.371236	0.481758	0.110506	0.365637	0.266521	0.31084	0.470675	0.112338	0.510219	0.223602	0.279086	-0.0981464	0.541194	0.484317	0.31819	0.389401	0.0553447	-0.19126	-0.0407827	-0.413583	0.159551	-0.343636	0.238717	-0.294771	-0.0392462	0.167591	0.228794	-0.232384	0.310829	0.234475	0.427724	0.292433	0.268576	0.0441822	0.258849
Sig310	0.459115	0.221652	0.570753	0.380818	0.368417	0.364919	0.352652	0.175443	0.182834	0.11279	0.433607	0.445167	0.293953	0.337414	0.404958	0.493083	0.0976468	0.482385	0.263754	0.320806	0.481566	0.0966383	0.516245	0.239193	0.280128	-0.0803156	0.559729	0.525444	0.293821	0.372677	0.107303	-0.183795	-0.0718482	-0.394776	0.148153	-0.330183	0.229588	-0.28504	0.018909	0.157051	0.197858	-0.208547	0.299856	0.236912	0.461713	0.281871	0.267963	0.105886	0.22235
Sig374	0.445445	0.25557	0.484449	0.209192	0.394934	0.37306	0.388946	0.168453	0.250025	0.150109	0.319349	0.422063	0.265527	0.337239	0.370808	0.425686	0.0860929	0.339025	0.286827	0.273022	0.447771	0.0687781	0.471344	0.206748	0.277472	-0.00849932	0.497637	0.462624	0.369988	0.376436	0.0906712	-0.145399	-0.0139783	-0.36878	0.169792	-0.330028	0.25806	-0.229133	-0.00096339	0.168862	0.255709	-0.203093	0.282871	0.249082	0.365498	0.271819	0.267926	0.0532274	0.250831
Sig154	0.25903	0.188744	0.290603	0.00235495	0.273041	0.182974	0.270959	0.135249	0.125992	0.192762	0.157666	0.288193	0.166988	0.289095	0.188693	0.272179	0.0965905	0.172385	0.255023	0.171124	0.288758	0.100436	0.288457	0.0769689	0.19499	-0.00192687	0.349769	0.263946	0.21437	0.188894	0.0990668	-0.0643985	-0.0778541	-0.209755	0.0213907	-0.19633	0.0861142	-0.105425	-0.00953843	0.0399068	0.0815053	-0.142743	0.140591	0.175941	0.212732	0.238759	0.267089	-0.0483819	0.245639
Sig107	0.277988	0.100424	0.493822	0.741133	0.302228	0.114182	0.259304	0.0670285	0.0230165	-0.00228781	0.3747	0.308563	0.215838	0.247676	0.259532	0.348896	0.0235114	0.534782	0.0729351	0.283019	0.325233	0.0747402	0.438493	0.140107	0.116662	-0.138803	0.409723	0.484237	0.114666	0.219783	0.00389682	-0.0738056	-0.171382	-0.316821	0.0634699	-0.268501	0.16015	-0.252146	-0.0641639	0.124532	0.0672805	-0.176313	0.280386	0.123464	0.559856	0.0839117	0.264534	-0.0563341	0.231661
Sig308	0.525482	0.354108	0.477708	0.0221218	0.46537	0.452734	0.472116	0.263866	0.320889	0.224306	0.376333	0.475009	0.311482	0.389226	0.446789	0.449443	0.126864	0.302585	0.393668	0.303471	0.487674	0.0564691	0.497272	0.231319	0.346547	0.0211604	0.541332	0.447961	0.478207	0.466917	0.193382	-0.186337	0.0414267	-0.406724	0.238512	-0.3489	0.305857	-0.233366	0.0531918	0.201688	0.32024	-0.233396	0.249511	0.328856	0.320164	0.338727	0.264462	0.165833	0.268353
Sig377	0.353375	0.208547	0.446978	0.20793	0.407645	0.205943	0.366992	0.165264	0.0861167	0.108915	0.271765	0.366843	0.209161	0.271754	0.258842	0.392289	0.0660817	0.303037	0.279308	0.240075	0.381688	0.0367509	0.435682	0.0999677	0.255676	-0.0852149	0.440892	0.396847	0.230769	0.288238	0.086873	-0.132666	-0.126113	-0.304435	0.0597658	-0.250327	0.13767	-0.199587	-0.0161777	0.0671779	0.111803	-0.182477	0.257435	0.224719	0.374587	0.195074	0.263608	-0.00581733	0.264176
Sig394	0.421374	0.25316	0.465043	0.214638	0.423476	0.320715	0.401272	0.182478	0.178264	0.171544	0.323837	0.40987	0.272726	0.357399	0.351673	0.407459	0.0925352	0.327126	0.275689	0.286811	0.425726	0.0656031	0.472517	0.206998	0.266454	-0.0221568	0.465477	0.429922	0.366306	0.381276	0.114511	-0.146825	-0.00453542	-0.378823	0.183739	-0.318735	0.26895	-0.244664	-0.00366178	0.196547	0.24091	-0.212116	0.245575	0.267451	0.376305	0.231164	0.263578	0.07622	0.273408
Sig114	0.450099	0.294698	0.473652	-0.0348699	0.361634	0.414792	0.36722	0.215954	0.249181	0.277927	0.372021	0.438045	0.288399	0.33102	0.399069	0.429821	0.11568	0.288297	0.421802	0.237718	0.454062	0.0573536	0.427245	0.152005	0.296457	0.00195661	0.547305	0.41894	0.366073	0.392903	0.218089	-0.180049	0.00945103	-0.362549	0.167411	-0.292494	0.218181	-0.203263	0.0208497	0.117433	0.23604	-0.208106	0.226455	0.339467	0.294067	0.398166	0.263371	0.14885	0.22741
Sig299	0.484758	0.221354	0.507741	0.00193887	0.346492	0.506214	0.313279	0.14306	0.181945	0.127283	0.43624	0.381635	0.325858	0.309304	0.413642	0.415479	0.0984783	0.35357	0.258813	0.293937	0.423174	0.139174	0.41147	0.22065	0.249921	-0.0458274	0.535427	0.431307	0.305699	0.393248	0.0847154	-0.189189	0.0615853	-0.330157	0.221908	-0.269935	0.271674	-0.228541	0.0144582	0.21483	0.259468	-0.166924	0.231741	0.224825	0.286124	0.288865	0.263213	0.151123	0.225681
Sig279	0.398039	0.252028	0.394528	-0.0724363	0.297323	0.352504	0.320024	0.193041	0.233535	0.188327	0.285663	0.37872	0.254059	0.276398	0.325259	0.344901	0.105778	0.208984	0.312714	0.178661	0.393402	0.061562	0.358817	0.115689	0.264365	0.0336224	0.445296	0.342151	0.298064	0.314863	0.174035	-0.104219	-0.00803202	-0.243724	0.116247	-0.249608	0.168239	-0.13267	0.00552348	0.0937261	0.177633	-0.165464	0.169398	0.215004	0.241667	0.298205	0.262743	0.0865343	0.225381
Sig241	0.567418	0.315669	0.603149	0.232173	0.527816	0.458538	0.456842	0.246417	0.208449	0.179374	0.439239	0.500685	0.347844	0.408353	0.475134	0.513852	0.124938	0.420161	0.369271	0.360094	0.550712	0.0747252	0.575945	0.280274	0.348717	-0.0651905	0.611497	0.544883	0.413557	0.474659	0.141511	-0.224616	0.018449	-0.474545	0.258631	-0.398012	0.339435	-0.315364	-0.012904	0.238715	0.333188	-0.266619	0.314334	0.294393	0.451662	0.318938	0.260283	0.160442	0.263428
Sig360	0.456946	0.260568	0.554945	0.331865	0.399741	0.367359	0.386004	0.194044	0.175257	0.166829	0.405074	0.456258	0.290703	0.358152	0.38287	0.473052	0.0902562	0.433852	0.29926	0.32603	0.477182	0.128912	0.50517	0.225597	0.28388	-0.0495712	0.537481	0.496456	0.319637	0.387572	0.11261	-0.171227	-0.0519674	-0.390262	0.165871	-0.332678	0.245954	-0.264952	-0.00712223	0.166726	0.224281	-0.220876	0.287245	0.243476	0.462033	0.265403	0.260262	0.0834547	0.231276
Sig225	0.319086	0.187576	0.390947	0.0819829	0.32441	0.236972	0.247928	0.144308	0.11559	0.153271	0.294736	0.320727	0.201849	0.285841	0.296343	0.321181	0.0841014	0.270428	0.225496	0.212189	0.333926	0.0413294	0.359597	0.0998069	0.201172	-0.022561	0.414674	0.329687	0.207459	0.272628	0.134485	-0.128223	-0.051653	-0.299382	0.118407	-0.242407	0.183839	-0.17797	-0.0103559	0.133772	0.142596	-0.189945	0.171216	0.219035	0.291879	0.210579	0.260142	0.0813965	0.266783
Sig256	0.429197	0.239282	0.499911	0.25677	0.369819	0.35374	0.363627	0.182071	0.195313	0.11185	0.403479	0.400865	0.282543	0.314138	0.409172	0.445324	0.0757673	0.423462	0.229497	0.279186	0.447557	0.0824932	0.473194	0.267309	0.25662	-0.0508018	0.496607	0.480239	0.303081	0.426424	0.0979066	-0.143576	-0.00917238	-0.367979	0.193765	-0.308532	0.276847	-0.258525	-0.0145564	0.213673	0.243704	-0.1865	0.261572	0.228791	0.406028	0.252992	0.259393	0.114718	0.223374
Sig106	0.477412	0.317119	0.487663	-0.0368962	0.383383	0.430016	0.408098	0.247891	0.308095	0.260083	0.387026	0.435044	0.282784	0.329056	0.412543	0.430345	0.119766	0.299979	0.409463	0.235032	0.467895	0.0530883	0.444774	0.167333	0.316578	0.0280412	0.564485	0.427113	0.40018	0.398684	0.238552	-0.176645	0.00912096	-0.372741	0.190333	-0.311046	0.235171	-0.197085	0.00742327	0.133508	0.257974	-0.217742	0.232584	0.308341	0.303551	0.42825	0.259053	0.163132	0.229856
Sig419	0.456745	0.268016	0.494982	0.12663	0.409589	0.383111	0.428068	0.186428	0.220138	0.190134	0.351666	0.443154	0.283139	0.394189	0.380684	0.431394	0.113266	0.333101	0.303128	0.300028	0.457884	0.0778632	0.478148	0.243187	0.284186	-0.0183107	0.49883	0.422814	0.352791	0.40144	0.126202	-0.135073	-0.00650848	-0.312037	0.205587	-0.248503	0.281954	-0.205929	0.0523609	0.201744	0.264821	-0.139333	0.252253	0.255073	0.338913	0.258002	0.258961	0.116091	0.257426
Sig510	0.3608	0.177408	0.518324	0.22367	0.338788	0.248216	0.296314	0.130995	0.103287	0.125313	0.312866	0.385823	0.214029	0.270681	0.286237	0.405878	0.0864279	0.333476	0.248149	0.20705	0.412143	0.0465301	0.445124	0.0900059	0.24141	-0.109694	0.497802	0.406442	0.199916	0.27111	0.0544615	-0.150658	-0.121607	-0.337238	0.0497897	-0.299003	0.126267	-0.233849	-0.0465764	0.0551838	0.107162	-0.202754	0.275987	0.18195	0.368368	0.214127	0.258599	0.0023844	0.226926
Sig371	0.379448	0.220281	0.45494	0.184002	0.361239	0.28402	0.361052	0.155689	0.15555	0.19639	0.324538	0.41174	0.249613	0.301874	0.324804	0.407836	0.0923676	0.343582	0.312305	0.266583	0.408034	0.0816898	0.436494	0.139907	0.234503	-0.0490285	0.471552	0.398714	0.290861	0.314558	0.123071	-0.143116	-0.0396834	-0.346757	0.115959	-0.294245	0.18052	-0.226276	-0.0246714	0.11108	0.16881	-0.207284	0.240947	0.210794	0.349607	0.258766	0.25762	0.0477594	0.239142
Sig46	0.346401	0.241204	0.38112	-0.0356008	0.274528	0.33074	0.336145	0.153259	0.32827	0.181792	0.275394	0.353559	0.205505	0.277792	0.301626	0.354161	0.0883579	0.231764	0.332746	0.171794	0.388552	0.0275457	0.329503	0.130153	0.252291	0.0870498	0.44509	0.368422	0.383815	0.274596	0.162986	-0.114707	-0.0179111	-0.232133	0.0794686	-0.199555	0.129491	-0.11364	0.0598414	0.0595026	0.150506	-0.129389	0.195757	0.192966	0.221478	1	0.256975	0.0686048	0.21475
Sig18	0.438901	0.187594	0.624828	0.479691	0.343433	0.348633	0.331302	0.112246	0.151381	0.0333587	0.747513	0.400263	0.326988	0.325058	0.462684	0.505759	0.0577137	1	0.165501	0.363842	0.44837	0.120701	0.493448	0.282253	0.162634	-0.142371	0.606581	0.557178	0.24389	0.384431	0.0598305	-0.172196	-0.0541702	-0.389139	0.175501	-0.312854	0.248927	-0.311512	-0.0326884	0.187714	0.199839	-0.213716	0.308082	0.182294	0.531208	0.231764	0.254602	0.159722	0.164778
Sig506	0.482791	0.292966	0.466158	0.0761981	0.433042	0.418784	0.432176	0.225363	0.242489	0.191068	0.347016	0.433662	0.304856	0.374346	0.402203	0.438466	0.118913	0.300218	0.356307	0.291696	0.456106	0.0685744	0.470262	0.224371	0.324058	0.001399	0.511184	0.432639	0.450035	0.431154	0.158371	-0.154321	0.0122096	-0.392328	0.218763	-0.333231	0.290539	-0.225501	0.0214987	0.197485	0.29762	-0.218168	0.256624	0.283408	0.334341	0.328863	0.252551	0.134512	0.265798
Sig509	0.368122	0.184972	0.519731	0.341275	0.334221	0.273919	0.302556	0.111067	0.131806	0.074097	0.336983	0.400664	0.258505	0.291464	0.297758	0.419813	0.0745878	0.392351	0.187077	0.27704	0.42429	0.0654145	0.465129	0.137389	0.208629	-0.0983733	0.485261	0.451302	0.203037	0.27383	0.0495481	-0.134884	-0.0991747	-0.321765	0.0842623	-0.280313	0.167054	-0.22534	-0.0187023	0.106294	0.133206	-0.193443	0.293773	0.187171	0.40188	0.193519	0.252273	0.0215176	0.234547
Sig85	0.556319	0.227336	0.726578	0.490828	0.416214	0.463317	0.39746	0.135825	0.174266	0.043229	0.812742	0.463077	0.428592	0.348505	0.66082	0.569942	0.0677116	0.767527	0.210982	0.383846	0.536934	0.0851836	0.578641	0.338244	0.215478	-0.160152	0.704789	0.630275	0.299827	0.4995	0.0670396	-0.249368	0.00804527	-0.481182	0.295725	-0.377709	0.356507	-0.392447	-0.0531664	0.287842	0.310958	-0.248207	0.347161	0.227684	0.58427	0.285814	0.251698	0.258356	0.1675
Sig554	0.328565	0.190614	0.405301	0.118086	0.297933	0.26062	0.288895	0.130294	0.162664	0.127747	0.298921	0.360433	0.21197	0.268743	0.287529	0.372278	0.0810955	0.286301	0.242509	0.194674	0.354912	0.0415126	0.383832	0.133942	0.224472	-0.00765454	0.422809	0.336575	0.260552	0.279016	0.123794	-0.0934647	-0.0815943	-0.282401	0.082067	-0.230534	0.144713	-0.166503	-0.0100669	0.094904	0.131943	-0.181533	0.202951	0.20669	0.287228	0.265096	0.25029	0.058384	0.217416
Sig376	0.492982	0.285704	0.524159	0.218665	0.412144	0.434092	0.398481	0.198602	0.242965	0.170208	0.3972	0.445603	0.304854	0.366016	0.39915	0.440033	0.107527	0.388253	0.291559	0.303134	0.474819	0.0893292	0.492242	0.230737	0.294658	-0.0322466	0.534208	0.494676	0.372595	0.413056	0.104495	-0.174642	0.0288948	-0.405053	0.207137	-0.345265	0.272124	-0.271451	-0.00345466	0.185084	0.270954	-0.213299	0.280567	0.260792	0.398018	0.317703	0.249972	0.119709	0.22662
Sig390	0.401115	0.226744	0.452868	0.159791	0.36663	0.331716	0.362502	0.172292	0.181028	0.167595	0.308718	0.383191	0.247086	0.3302	0.314062	0.390458	0.106734	0.302034	0.260075	0.26676	0.405252	0.0494611	0.461968	0.177437	0.260273	-0.0300915	0.459771	0.401211	0.316622	0.350369	0.0974594	-0.150075	-0.0251743	-0.338217	0.157323	-0.287586	0.235538	-0.217731	0.00873814	0.177563	0.226531	-0.194677	0.243999	0.261817	0.332741	0.227842	0.245273	0.077794	0.218695
Sig363	0.14646	0.10234	0.21756	0.140837	0.217474	0.0290511	0.181787	0.141832	0.0484671	0.0912015	0.103814	0.216516	0.0930525	0.174486	0.101977	0.205906	0.0269963	0.153361	0.116822	0.119417	0.208072	0.00231376	0.26326	0.0163304	0.124446	-0.0405494	0.245825	0.199285	0.124469	0.118233	0.0346224	-0.0122228	-0.116472	-0.172623	0.00802188	-0.164596	0.0872801	-0.085462	-0.0411383	0.0636371	0.0282898	-0.140874	0.110774	0.166956	0.213673	0.084894	0.243717	-0.0933432	0.253555
Sig269	0.320153	0.196639	0.384403	0.207642	0.350521	0.220753	0.326996	0.144481	0.122467	0.128075	0.23697	0.337841	0.194838	0.28245	0.237634	0.324246	0.0986448	0.268006	0.219146	0.237633	0.343076	0.0285031	0.383715	0.112355	0.26279	-0.045514	0.383754	0.350484	0.246766	0.275777	0.0834906	-0.0994593	-0.0476064	-0.297293	0.102997	-0.262297	0.193358	-0.182558	-0.0286881	0.126883	0.169212	-0.177758	0.225232	0.226657	0.322197	0.193242	0.243683	-0.015218	0.257975
Sig521	0.270302	0.204488	0.295502	0.0911382	0.332406	0.159043	0.316493	0.172337	0.180471	0.162974	0.151265	0.327632	0.151986	0.277709	0.186762	0.289506	0.0661539	0.167495	0.246175	0.179904	0.316642	0.0177331	0.379067	0.0783155	0.225969	0.00911435	0.346222	0.295888	0.25635	0.234991	0.0946825	-0.0671182	-0.09276	-0.254327	0.0563709	-0.231896	0.13625	-0.123939	-0.00417752	0.0701531	0.119559	-0.174734	0.192271	0.205888	0.262138	0.206339	0.242924	-0.0274922	0.258189
Sig221	0.159024	0.106715	0.254579	0.174244	0.239622	0.0478653	0.213828	0.0933762	0.054473	0.136606	0.0973803	0.243856	0.0922416	0.183022	0.0987039	0.212694	0.0466257	0.157152	0.176942	0.113571	0.24106	0.0148382	0.259392	0.0132059	0.178679	-0.0317416	0.254434	0.231421	0.144325	0.107994	0.0500868	0.00745797	-0.154069	-0.170372	-0.0754988	-0.145812	0.00131064	-0.0576931	-0.0024043	-0.0350231	-0.0100955	-0.108174	0.151808	0.116957	0.250826	0.114829	0.242473	-0.140913	0.273077
Sig468	0.375951	0.176161	0.488451	0.216583	0.322146	0.296584	0.26946	0.122261	0.134152	0.0952727	0.338808	0.384275	0.247063	0.266384	0.300438	0.416583	0.0923475	0.339019	0.199965	0.234623	0.408148	0.0664582	0.435897	0.144206	0.214803	-0.0567057	0.466996	0.394723	0.262756	0.294046	0.106534	-0.137426	-0.0429466	-0.324192	0.132134	-0.275727	0.197242	-0.22279	-0.016894	0.140957	0.165482	-0.19468	0.23614	0.186002	0.34886	0.224458	0.241292	0.0544241	0.217497
Sig325	0.563935	0.313176	0.557536	0.101891	0.504241	0.471907	0.440625	0.217145	0.181531	0.139865	0.432538	0.447607	0.327792	0.358053	0.474257	0.479935	0.12808	0.379237	0.313285	0.329713	0.487744	0.101525	0.504565	0.277388	0.325859	-0.0546267	0.568351	0.496987	0.369903	0.471174	0.114293	-0.218879	0.0302656	-0.421835	0.26527	-0.340688	0.338895	-0.279374	-0.00630321	0.2276	0.33336	-0.23263	0.268122	0.370311	0.382503	0.285812	0.237175	0.171925	0.2442
Sig164	0.363336	0.184138	0.469428	0.217963	0.368863	0.285833	0.330387	0.144082	0.101099	0.123118	0.290995	0.386398	0.224973	0.307777	0.270994	0.395116	0.0768786	0.316957	0.22857	0.23139	0.395828	0.0665773	0.441677	0.157093	0.236095	-0.0677296	0.455431	0.395409	0.228835	0.283937	0.0564823	-0.136906	-0.0570502	-0.320175	0.11552	-0.286645	0.165669	-0.214103	-0.022767	0.10109	0.172521	-0.188899	0.264915	0.187732	0.363645	0.207283	0.23674	0.00903145	0.215187
Sig70	0.342059	0.0647157	0.359338	-0.030202	0.445049	0.281503	0.1133	0.0681593	-0.0704674	0.0241139	0.285144	0.175272	0.192491	0.161083	0.245344	0.202925	0.0575576	0.217959	0.103523	0.187623	0.196871	0.043501	0.216322	0.101835	0.116205	-0.126229	0.310668	0.27297	0.0639407	0.231315	0.0334808	-0.118013	0.0151166	-0.254232	0.231287	-0.167536	0.274218	-0.213601	-0.074936	0.285121	0.196715	-0.12808	0.0944591	0.162047	0.23143	0.108564	0.232981	0.0888938	0.272936
Sig570	0.397459	0.193506	0.471759	0.140075	0.356602	0.333604	0.306051	0.141442	0.126324	0.172921	0.340531	0.383155	0.263221	0.310545	0.333327	0.391003	0.105193	0.326885	0.255377	0.253275	0.400205	0.075303	0.427407	0.179165	0.229867	-0.0439429	0.484205	0.407212	0.263475	0.329052	0.122452	-0.154214	-0.0254547	-0.329962	0.138471	-0.269513	0.194687	-0.220455	-0.0158879	0.130111	0.186461	-0.18753	0.25342	0.205454	0.328365	0.296282	0.230714	0.0715855	0.223461
Sig534	0.419364	0.25488	0.468492	0.131061	0.390429	0.369213	0.337153	0.188009	0.169117	0.143313	0.331541	0.386381	0.243333	0.337613	0.35537	0.397142	0.0753922	0.305129	0.260663	0.250673	0.411937	0.0609751	0.453399	0.165007	0.252422	-0.0456915	0.476435	0.416888	0.298908	0.368722	0.107119	-0.176434	-0.0100397	-0.355585	0.17472	-0.299105	0.233389	-0.239421	-0.0106355	0.156768	0.225804	-0.191597	0.259939	0.234325	0.316621	0.242678	0.228858	0.112791	0.211404
Sig203	0.626053	0.324937	0.615294	0.107227	0.4954	0.573022	0.454673	0.243747	0.245152	0.179599	0.480866	0.499728	0.370841	0.406543	0.510264	0.536771	0.136942	0.396508	0.368086	0.340891	0.549899	0.0931231	0.562489	0.273479	0.348033	-0.0416035	0.640547	0.547489	0.422885	0.518719	0.141956	-0.245198	0.0755518	-0.464884	0.291583	-0.387083	0.345848	-0.315447	0.0055504	0.23563	0.366915	-0.240549	0.318578	0.306081	0.39066	0.368679	0.225861	0.221155	0.227585
Sig428	0.416693	0.28245	0.427308	0.11341	0.346137	0.36747	0.348906	0.228431	0.262673	0.17736	0.322647	0.368602	0.24317	0.313825	0.362103	0.361076	0.0848596	0.30029	0.314287	0.243504	0.401202	0.042482	0.396657	0.183703	0.258172	0.000672487	0.451497	0.389343	0.325097	0.354439	0.124382	-0.142114	0.00881305	-0.327414	0.181447	-0.275844	0.24022	-0.197222	-0.002801	0.171417	0.227715	-0.185548	0.242918	0.2321	0.308501	0.301109	0.22567	0.11184	0.217606
Sig101	0.472821	0.345271	0.468383	-0.0179759	0.363684	0.423101	0.418177	0.208792	0.32401	0.374249	0.35528	0.465733	0.274378	0.363813	0.418458	0.428844	0.131302	0.27921	0.507034	0.241988	0.492693	0.0384536	0.429162	0.176544	0.362991	0.116127	0.515547	0.414775	0.369997	0.385791	0.290114	-0.123477	0.0381199	-0.306452	0.192583	-0.291672	0.241115	-0.118663	0.0565268	0.143085	0.265924	-0.204304	0.239857	0.322167	0.270212	0.34469	0.225194	0.187383	0.193736
Sig295	0.20931	0.157797	0.235599	0.136004	0.242002	0.100786	0.240328	0.131608	0.137174	0.169377	0.135892	0.245508	0.150799	0.246758	0.160055	0.226119	0.0489962	0.167214	0.205165	0.178026	0.241451	0.0283425	0.281666	0.0478694	0.200487	0.0179862	0.263326	0.237594	0.253543	0.199698	0.139125	-0.031018	-0.100961	-0.207051	0.0215149	-0.178235	0.0958686	-0.104741	0.00565452	0.0593428	0.0768452	-0.13922	0.15675	0.192642	0.242988	0.146486	0.224772	-0.0504045	0.247869
Sig44	0.314763	0.197327	0.29762	-0.00848297	0.313853	0.219268	0.27367	0.201925	0.15491	0.14208	0.220684	0.282606	0.165304	0.263949	0.245288	0.297981	0.0998944	0.182294	0.241237	0.167437	0.283836	0.0307707	0.331354	0.0808541	0.241489	0.0190064	0.349333	0.271194	0.232777	0.277081	0.145662	-0.0798105	-0.0322119	-0.245265	0.130889	-0.204291	0.190124	-0.110863	0.00194968	0.112377	0.17782	-0.182247	0.143251	1	0.202473	0.192966	0.222844	0.0769475	0.238728
Sig477	0.497332	0.243315	0.520215	0.0833342	0.399226	0.465885	0.386815	0.145001	0.189751	0.12631	0.464253	0.410609	0.321716	0.316275	0.467563	0.450383	0.0937277	0.372915	0.266721	0.297305	0.460686	0.109709	0.448918	0.260286	0.253256	-0.0494638	0.544303	0.443422	0.359775	0.471081	0.104215	-0.168208	0.0735285	-0.385096	0.271996	-0.313625	0.333802	-0.246146	-0.00764612	0.278166	0.321886	-0.215123	0.237132	0.251648	0.366854	0.26399	0.222567	0.192933	0.199773
Sig483	0.334624	0.342882	0.299016	-0.157408	0.261572	0.313545	0.340207	0.253547	0.368967	0.262866	0.232899	0.326431	0.166925	0.233694	0.330205	0.271541	0.0978718	0.152075	0.472552	0.130223	0.345109	0.00710851	0.27835	0.0737738	0.25028	0.10974	0.393785	0.278194	0.323822	0.261006	0.254422	-0.0765743	0.0292223	-0.211359	0.104396	-0.210665	0.148203	-0.0348965	0.0200919	0.0468801	0.190229	-0.1498	0.129649	0.216909	0.144722	0.406903	0.221828	0.105938	0.189316
Sig185	0.222516	0.122522	0.270681	0.0206905	0.282928	0.138977	0.27023	0.0908166	0.0622551	0.0787433	0.195252	0.191425	0.206319	0.201377	0.207507	0.203336	0.0493263	0.188263	0.162225	0.143204	0.203487	0.0341491	0.23027	0.0495925	0.134612	-0.0454876	0.290914	0.215373	0.202297	0.191509	0.0621238	-0.0517577	-0.0691303	-0.166407	0.0429488	-0.142854	0.127628	-0.0954303	-0.0177544	0.0700348	0.0997431	-0.0969103	0.103243	0.15601	0.198244	0.1624	0.221548	-0.025217	0.218061
Sig261	0.432615	0.18872	0.560345	0.365103	0.353217	0.341874	0.325253	0.12371	0.117629	0.0864784	0.374709	0.400184	0.258759	0.311707	0.346966	0.435015	0.0702263	0.405164	0.223159	0.258212	0.425685	0.0710584	0.487838	0.170218	0.251185	-0.109081	0.523655	0.479728	0.254836	0.32796	0.0500935	-0.181231	-0.0431273	-0.370748	0.150508	-0.309106	0.212246	-0.280605	-0.0305443	0.144716	0.192503	-0.202375	0.291847	0.17924	0.438259	0.217965	0.22028	0.0859317	0.179978
Sig427	0.302258	0.194571	0.325689	0.0941155	0.317691	0.208577	0.294224	0.173808	0.109128	0.114356	0.220108	0.315725	0.164964	0.246736	0.219351	0.301751	0.0754342	0.217391	0.20598	0.175164	0.309829	0.0499494	0.331244	0.0959785	0.197799	-0.0168567	0.351226	0.281075	0.225123	0.256895	0.0695931	-0.0968775	-0.0446315	-0.250006	0.0814449	-0.230184	0.146758	-0.161938	0.00588432	0.0901595	0.141706	-0.155736	0.180027	0.181617	0.259584	0.167933	0.219855	-0.0154513	0.218971
Sig292	0.483568	0.413912	0.36684	-0.117239	0.490436	0.389013	0.460551	0.402687	0.282416	0.226912	0.275933	0.382821	0.270564	0.327948	0.412438	0.354415	0.137444	0.181725	0.441325	0.245338	0.419293	0.022333	0.400199	0.170016	0.308729	0.0683599	0.459363	0.346486	0.427919	0.414965	0.17484	-0.149529	0.0934282	-0.341641	0.231819	-0.306574	0.299002	-0.164813	-0.00698716	0.178512	0.353956	-0.201782	0.205012	0.320257	0.214718	0.34533	0.219422	0.137071	0.244049
Sig189	0.380568	0.196847	0.483454	0.490099	0.371954	0.249055	0.34491	0.150259	0.124776	0.0947576	0.311642	0.395514	0.240691	0.322926	0.286282	0.42309	0.0672192	0.403013	0.203195	0.288638	0.417139	0.0888332	0.496479	0.168061	0.224995	-0.0712126	0.446369	0.46813	0.265192	0.318896	0.0533332	-0.149706	-0.0772342	-0.365107	0.1188	-0.318531	0.200292	-0.266097	-0.0130873	0.133724	0.184312	-0.203799	0.319107	0.189487	0.482887	0.177785	0.218485	0.0176778	0.197347
Sig183	0.0310254	0.0302486	0.0592925	-0.205792	0.132408	-0.00358021	0.0987835	0.00477233	-0.0154311	0.0538565	0.0539453	0.0613871	0.0453874	0.0877814	0.0530826	0.0413728	0.0156667	0.0136981	0.072072	0.036558	0.0391187	0.0391202	0.0350263	-0.0132868	0.0399569	-0.00956595	0.0933856	0.0186386	0.0300212	0.0488378	0.0350157	0.0305652	-0.0849268	-0.0212748	-0.064792	-0.0156487	-0.0142722	0.0224895	-0.0210452	-0.0114156	-0.0540743	-0.0376047	-0.0284501	0.0854573	0.0101636	0.0738584	0.218474	-0.120372	0.233238
Sig10	0.126792	0.185083	0.133903	-0.0712974	0.177041	0.0678201	0.240064	0.126937	0.22244	1	0.0390807	0.326685	0.0620554	0.370798	0.0847168	0.153331	0.138568	0.0333587	0.486464	0.0937893	0.221712	0.0131187	0.176934	-0.0138952	0.248673	0.239978	0.187816	0.133831	0.179695	0.108201	0.340352	0.084911	-0.0996588	-0.0505371	-0.0557167	-0.0991406	-0.00488625	0.120918	0.0392436	-0.0531885	0.0194811	-0.0835978	0.0719587	0.14208	0.100442	0.181792	0.216282	-0.0778651	0.227329
Sig497	0.325131	0.203516	0.365971	0.146821	0.367747	0.206358	0.320995	0.163163	0.123202	0.136325	0.224922	0.341293	0.175633	0.284202	0.254471	0.334887	0.0656717	0.227243	0.248496	0.218626	0.348256	0.0235493	0.412701	0.102717	0.223671	-0.0482644	0.388663	0.334998	0.249472	0.273776	0.0758392	-0.124225	-0.0633588	-0.304328	0.104945	-0.255971	0.17494	-0.195603	-0.0224325	0.109356	0.151869	-0.18456	0.215827	0.207459	0.302685	0.196832	0.215786	0.0234833	0.239956
Sig443	0.394418	0.297185	0.415387	0.0115862	0.317644	0.367244	0.395351	0.18428	0.357165	0.229439	0.299129	0.421085	0.232479	0.287988	0.352435	0.381027	0.102793	0.249055	0.383384	0.217335	0.45757	0.0278816	0.401378	0.14651	0.360257	0.109231	0.432649	0.360511	0.343921	0.324374	0.214796	-0.0955018	-0.0175236	-0.225444	0.114754	-0.250027	0.168918	-0.0627779	0.0546286	0.0799181	0.221585	-0.16765	0.235173	0.228354	0.238858	0.305744	0.21577	0.112927	0.17682
Sig426	0.43636	0.236563	0.501265	0.220861	0.381396	0.364103	0.390367	0.178821	0.166459	0.12647	0.348784	0.392621	0.257557	0.30822	0.352186	0.426665	0.0834438	0.351213	0.268021	0.251782	0.430176	0.0648151	0.458038	0.203976	0.253236	-0.0576745	0.490782	0.439442	0.299148	0.35913	0.086971	-0.171396	-0.00972117	-0.360357	0.176666	-0.314604	0.237638	-0.243294	-0.0206302	0.156758	0.228048	-0.194782	0.254019	0.219321	0.37975	0.283874	0.215116	0.107478	0.18987
Sig321	0.345679	0.198638	0.361313	0.0580136	0.305423	0.252351	0.339639	0.147324	0.13296	0.104107	0.272671	0.299345	0.197853	0.24159	0.297652	0.321352	0.0669887	0.246141	0.233849	0.183133	0.327455	0.0583901	0.325865	0.164776	0.213045	0.000902228	0.37856	0.303155	0.248091	0.295729	0.112972	-0.104798	-0.0219691	-0.242294	0.109783	-0.196573	0.161547	-0.148771	0.00984511	0.112248	0.156761	-0.136026	0.192788	0.209421	0.294375	0.20114	0.213856	0.0580697	0.194133
Sig413	0.433204	0.234813	0.424046	0.0347534	0.387387	0.371473	0.342205	0.205275	0.186173	0.16689	0.318373	0.371528	0.288219	0.334739	0.34716	0.371335	0.101276	0.265081	0.285234	0.284558	0.403636	0.0561216	0.42289	0.176322	0.254884	-0.012676	0.443193	0.362925	0.322535	0.38338	0.103542	-0.133498	0.0264014	-0.278068	0.214303	-0.252123	0.27655	-0.192136	0.0301223	0.190473	0.266937	-0.162844	0.204705	0.259347	0.287951	0.243941	0.2131	0.139386	0.227534
Sig25	0.339775	0.232386	0.339774	0.0166926	0.313579	0.279986	0.313425	0.164766	0.194349	0.248673	0.200876	0.344343	0.183481	0.285393	0.263939	0.304502	0.0965476	0.162634	0.334736	0.198017	0.359078	0.041858	0.335862	0.0820836	1	0.105171	0.363393	0.316511	0.25215	0.25625	0.232426	-0.0795574	-0.0514523	-0.246986	0.0871577	-0.221512	0.142973	-0.101156	0.0566979	0.076047	0.166319	-0.134396	0.175181	0.241489	0.227826	0.252291	0.213064	0.0309901	0.226557
Sig109	0.33628	0.15477	0.483782	0.528708	0.330631	0.210418	0.27907	0.1058	0.0803307	0.0310354	0.35551	0.324422	0.234369	0.273078	0.301807	0.359898	0.0573964	0.447466	0.125912	0.263988	0.354481	0.0513208	0.443079	0.157498	0.167341	-0.111066	0.438386	0.446921	0.202839	0.274969	0.0341123	-0.135128	-0.100385	-0.34047	0.110569	-0.266567	0.192371	-0.267467	-0.0390442	0.147781	0.139826	-0.164625	0.264258	0.149677	0.475102	0.140653	0.213015	0.0264219	0.191243
Sig2	0.313129	1	0.286466	0.0102282	0.299035	0.248061	0.592949	0.350098	0.395721	0.185083	0.211161	0.316554	0.16869	0.238382	0.292456	0.288112	0.0713209	0.187594	0.354803	0.152079	0.35464	0.0220952	0.302085	0.117263	0.232386	0.108186	0.353102	0.287966	0.292781	0.27875	0.191334	-0.0675769	-0.00271067	-0.21336	0.115711	-0.222685	0.177693	-0.0142956	0.020036	0.0824397	0.201958	-0.140372	0.166964	0.197327	0.190785	0.241204	0.210908	0.108068	0.167338
Sig461	0.351614	0.182431	0.381456	0.143783	0.322898	0.270582	0.276838	0.125928	0.137358	0.112896	0.263737	0.314479	0.2178	0.296692	0.267947	0.318509	0.0771491	0.265136	0.211466	0.223367	0.326172	0.057204	0.371314	0.164119	0.195267	-0.0510559	0.394338	0.362068	0.227817	0.273361	0.0717083	-0.111011	0.00223771	-0.283143	0.154231	-0.232578	0.218275	-0.177747	-0.00868521	0.160795	0.185463	-0.158097	0.181402	0.235051	0.302798	0.19581	0.210841	0.0577517	0.206114
Sig110	0.429377	0.277903	0.476259	0.00279953	0.316863	0.405322	0.354286	0.180233	0.321029	0.211568	0.360936	0.41022	0.271642	0.288267	0.376747	0.405507	0.0994924	0.294837	0.340281	0.203012	0.436529	0.0566779	0.402752	0.155855	0.271038	0.0233963	0.510667	0.407262	0.337747	0.352239	0.214767	-0.156008	-0.00764996	-0.31872	0.160474	-0.276231	0.190315	-0.160156	0.0217215	0.105905	0.231777	-0.191596	0.226538	0.236268	0.273108	0.380208	0.210413	0.166164	0.172324
Sig547	0.23471	0.22376	0.237754	-0.00558863	0.288663	0.163315	0.265612	0.193554	0.116768	0.114672	0.180586	0.235539	0.144092	0.236264	0.217358	0.204418	0.0550251	0.149281	0.211318	0.149574	0.235464	0.0154107	0.268136	0.0820028	0.186154	0.00698964	0.278459	0.213188	0.209416	0.212522	0.117016	-0.0848044	-0.0368607	-0.220966	0.0809431	-0.19056	0.136297	-0.118498	-0.00948063	0.0873675	0.1174	-0.149489	0.109312	0.191379	0.180236	0.149047	0.209508	0.0253418	0.226954
Sig400	0.532693	0.356122	0.485012	0.0316471	0.402787	0.484812	0.438442	0.279045	0.30244	0.236424	0.368392	0.448376	0.331715	0.355871	0.454996	0.4565	0.145652	0.303041	0.436895	0.30922	0.51638	0.0651071	0.460953	0.233745	0.319253	0.0495249	0.531191	0.44354	0.433548	0.450999	0.144883	-0.160732	0.0656892	-0.333526	0.238819	-0.294965	0.295929	-0.182989	0.0397468	0.193627	0.325382	-0.166814	0.249372	0.267244	0.301727	0.342572	0.208628	0.165638	0.191894
Sig480	0.324153	0.232773	0.290835	0.0648968	0.305401	0.255454	0.331607	0.194162	0.24604	0.180768	0.199857	0.305903	0.203412	0.288426	0.267074	0.284045	0.0579464	0.177605	0.27896	0.223925	0.315433	0.0197832	0.33629	0.163392	0.249979	0.0491733	0.3193	0.296857	0.340839	0.314062	0.144483	-0.0384111	-0.00491951	-0.248302	0.129747	-0.227884	0.194496	-0.0878132	0.0893201	0.128306	0.201034	-0.109053	0.138425	0.21387	0.238522	0.197869	0.206786	0.0519411	0.230644
Sig501	0.520195	0.322968	0.489518	-0.0270135	0.413862	0.531488	0.418029	0.219497	0.293881	0.204764	0.401444	0.431855	0.318645	0.378791	0.440956	0.439023	0.163823	0.301812	0.346977	0.305734	0.46698	0.0684058	0.449262	0.241721	0.295012	0.00533498	0.537093	0.442305	0.421943	0.449029	0.159853	-0.220876	0.0811743	-0.388531	0.270543	-0.316462	0.313239	-0.255024	0.0100909	0.231094	0.31768	-0.1898	0.232299	0.280861	0.278284	0.386963	0.205957	0.212013	0.197589
Sig447	0.347016	0.204557	0.432946	0.30703	0.285046	0.29528	0.280683	0.13461	0.159669	0.0800863	0.315555	0.324437	0.20516	0.237031	0.307066	0.34567	0.0496454	0.331267	0.193778	0.219897	0.355398	0.0405465	0.375733	0.157062	0.191135	-0.0312177	0.397452	0.408579	0.226379	0.292172	0.113346	-0.123305	-0.0313494	-0.285583	0.124586	-0.256282	0.188733	-0.189967	-0.009761	0.120525	0.17783	-0.15653	0.212828	0.170825	0.356709	0.209245	0.20546	0.0903181	0.128608
Sig450	0.354526	0.250324	0.358153	0.0115848	0.337394	0.292559	0.299854	0.165977	0.164833	0.157341	0.280913	0.35151	0.20043	0.273361	0.299288	0.329973	0.0752389	0.223677	0.279564	0.1942	0.342055	0.0632823	0.347221	0.115352	0.225022	-0.0172974	0.386774	0.309568	0.264443	0.283801	0.123042	-0.118124	-0.00246153	-0.283843	0.138654	-0.247846	0.185865	-0.161044	0.0013695	0.119841	0.186418	-0.178337	0.209088	0.260128	0.224241	0.230637	0.204113	0.0906063	0.215143
Sig372	0.269199	0.141071	0.30507	0.0901611	0.258029	0.231045	0.273811	0.116157	0.140468	0.0959807	0.183964	0.286557	0.166601	0.229923	0.193976	0.265271	0.0988154	0.202291	0.176114	0.180352	0.291907	0.0596959	0.275513	0.141304	0.165139	0.00779564	0.307491	0.270956	0.211608	0.217214	0.0868354	-0.0278373	-0.0106069	-0.153231	0.0879577	-0.184219	0.154199	-0.0811597	0.045545	0.093963	0.151744	-0.104728	0.160738	0.129976	0.211206	0.160128	0.203578	-0.0146557	0.185726
Sig281	0.310847	0.180356	0.354773	0.126166	0.314735	0.23127	0.290921	0.128265	0.0855434	0.137644	0.29291	0.289297	0.194548	0.255723	0.29607	0.305749	0.0677707	0.267974	0.220422	0.186293	0.305949	0.051029	0.338731	0.113879	0.174304	-0.0486992	0.363607	0.321271	0.251307	0.27839	0.0714033	-0.0871094	-0.0187595	-0.254536	0.103603	-0.216598	0.164964	-0.168831	0.00393855	0.109313	0.153486	-0.146267	0.162783	0.204882	0.280392	0.187593	0.202481	0.0346539	0.186166
Sig235	0.392088	0.228534	0.376738	0.10588	0.381558	0.317162	0.348793	0.203006	0.174428	0.145032	0.260651	0.348257	0.276391	0.308211	0.313531	0.337384	0.103097	0.239074	0.264462	0.232788	0.361502	0.0323553	0.396047	0.159242	0.261943	0.00316983	0.392985	0.363257	0.289516	0.323355	0.140611	-0.132994	0.00827025	-0.299842	0.170631	-0.243848	0.229633	-0.179719	0.0205217	0.155597	0.240475	-0.154819	0.213048	0.23903	0.284072	0.209887	0.201763	0.0848737	0.210864
Sig131	0.273407	0.153556	0.290882	0.0708559	0.291932	0.185046	0.22345	0.136833	0.101107	0.113959	0.213246	0.271909	0.160472	0.225378	0.220975	0.231824	0.051384	0.191412	0.180818	0.178268	0.287449	0.013246	0.286101	0.105718	0.171561	-0.0196968	0.339514	0.279517	0.199859	0.225149	0.109728	-0.10394	-0.0479084	-0.25907	0.0968251	-0.21117	0.160338	-0.16067	-0.0439259	0.114645	0.13029	-0.173457	0.131409	0.196269	0.233917	0.168397	0.200483	0.0427344	0.218654
Sig100	0.340685	0.136975	0.55285	0.842121	0.274718	0.193814	0.310458	0.0726865	0.0806836	-0.0152983	0.467057	0.334424	0.252733	0.310364	0.329572	0.397807	0.0165723	0.655622	0.0830252	0.312683	0.373384	0.0852997	0.472189	0.226174	0.118757	-0.139421	0.467348	0.546985	0.17969	0.276672	0.0175692	-0.122774	-0.122718	-0.343768	0.111311	-0.276013	0.199156	-0.292084	-0.0333374	0.162267	0.129579	-0.156728	0.304652	0.106015	0.625503	0.116385	0.199341	0.047686	0.116175
Sig414	0.496756	0.254254	0.647114	0.580553	0.379282	0.388568	0.362571	0.150174	0.162198	0.136145	0.498783	0.454512	0.306175	0.336076	0.438827	0.499861	0.0999602	0.574111	0.25106	0.318553	0.488559	0.0869719	0.541097	0.246764	0.220551	-0.0586805	0.584842	0.591106	0.264202	0.374723	0.13691	-0.191013	-0.0450194	-0.405169	0.199927	-0.337871	0.268137	-0.2821	-0.0245745	0.193986	0.242422	-0.205382	0.32242	0.205077	0.53433	0.22068	0.196643	0.146081	0.13681
Sig314	0.163968	0.100609	0.237558	0.176516	0.225187	0.0620464	0.174704	0.0862792	0.0507092	0.0812856	0.128981	0.188193	0.109964	0.191996	0.1127	0.179401	0.0322342	0.176497	0.122516	0.13727	0.196645	0.0490691	0.246923	0.0442753	0.135616	-0.0509834	0.235816	0.205404	0.122249	0.142222	0.0572182	-0.0508811	-0.103997	-0.18771	0.00919237	-0.156939	0.069882	-0.115291	-0.0191497	0.0282487	0.0438782	-0.117679	0.109432	0.112806	0.25222	0.0871089	0.196482	-0.0730841	0.209867
Sig75	0.0518206	0.0829458	0.203432	-0.0269784	0.0519629	0.0291601	0.0730589	0.0646574	0.0673319	0.157485	0.171415	0.136315	0.0533202	0.0756359	0.117647	0.105081	0.016632	0.159967	0.215698	0.0370464	0.138619	0.0246115	0.130546	-0.0806906	0.094876	-0.0597163	0.289161	0.158948	0.028529	0.0403488	0.170164	-0.0346199	-0.143176	-0.146986	-0.107261	-0.135813	-0.0723528	-0.0593262	-0.0492229	-0.103851	-0.0778481	-0.138653	0.0559552	0.0939	0.173415	0.257209	0.193892	-0.0560714	0.153802
Sig465	0.52914	0.239428	0.570818	0.141621	0.416414	0.468183	0.338658	0.18509	0.145443	0.103215	0.470506	0.409807	0.382324	0.323495	0.473632	0.461358	0.105745	0.399659	0.275883	0.33744	0.450536	0.0995771	0.483685	0.232121	0.248844	-0.0842078	0.554113	0.489061	0.290435	0.417307	0.109841	-0.233562	0.0542885	-0.400531	0.269799	-0.30418	0.317387	-0.3037	-0.0158731	0.220945	0.312492	-0.195803	0.2728	0.258297	0.356266	0.262735	0.192762	0.252394	0.176999
Sig337	0.511428	0.298773	0.458714	-0.00260512	0.431673	0.456941	0.410099	0.228313	0.233118	0.185325	0.359518	0.418337	0.292778	0.362475	0.42032	0.433273	0.139734	0.271787	0.331533	0.307242	0.458789	0.0541286	0.452479	0.229632	0.31719	0.0183005	0.499262	0.411057	0.445059	0.437144	0.159208	-0.200803	0.0687599	-0.366599	0.250786	-0.300102	0.293439	-0.225262	0.0354641	0.198382	0.319241	-0.191333	0.236158	0.289083	0.27832	0.314194	0.192217	0.201484	0.194164
Sig227	0.566007	0.250101	0.617395	0.189149	0.4438	0.547334	0.389258	0.170337	0.165911	0.115988	0.433934	0.477781	0.335585	0.349889	0.462686	0.523307	0.155087	0.392391	0.291628	0.317323	0.518873	0.100014	0.526394	0.269307	0.296063	-0.0973519	0.594681	0.531433	0.342516	0.433269	0.0520586	-0.261763	0.0590759	-0.432075	0.259142	-0.362267	0.304548	-0.329647	-0.0284786	0.21331	0.327285	-0.21177	0.330538	0.235618	0.391786	0.322119	0.191485	0.178094	0.162821
Sig242	0.352049	0.187121	0.429641	0.274935	0.297946	0.280772	0.292584	0.134164	0.140727	0.104872	0.335085	0.345228	0.232394	0.279377	0.309245	0.351083	0.0692786	0.34473	0.197009	0.258202	0.370082	0.0768023	0.399384	0.171348	0.186166	-0.0500644	0.417402	0.38748	0.248416	0.3151	0.0763283	-0.147138	-0.0300652	-0.317909	0.138297	-0.265513	0.193512	-0.223452	-0.0138209	0.138727	0.17399	-0.184053	0.211427	0.198843	0.351651	0.202545	0.191392	0.0767567	0.17706
Sig50	0.00552054	0.0660622	0.162904	-0.0363263	0.0298954	-0.0238816	0.0478695	0.0489653	0.0512496	0.144434	0.156216	0.0986659	0.0308202	0.0619221	0.088132	0.0665099	0.00166542	0.144644	0.182917	0.0208648	0.100033	0.0124151	0.106075	-0.102696	0.0731041	-0.0629424	0.250226	0.122415	0.0100564	0.0180816	0.173704	-0.0220023	-0.153009	-0.130969	-0.115092	-0.115139	-0.080803	-0.0486918	-0.0523112	-0.10477	-0.0983752	-0.136762	0.0294984	0.100166	0.156748	0.233435	0.191004	-0.0544987	0.159344
Sig260	0.38441	0.22319	0.401191	-0.00435257	0.323938	0.357063	0.332171	0.167633	0.159583	0.137492	0.286252	0.350671	0.236394	0.274184	0.309084	0.35805	0.095909	0.230055	0.270706	0.206982	0.38333	0.0523462	0.375581	0.184757	0.260013	-0.00519153	0.425434	0.341253	0.298734	0.30788	0.10477	-0.157994	0.0180326	-0.303475	0.150159	-0.222398	0.192396	-0.184956	0.0258768	0.120406	0.208053	-0.132243	0.195866	0.180698	0.224649	0.264675	0.190191	0.093906	0.18073
Sig335	0.442857	0.289579	0.37885	-0.0697875	0.379265	0.408587	0.391568	0.226713	0.264452	0.214989	0.265919	0.38877	0.264652	0.302491	0.341801	0.377557	0.154901	0.201276	0.346944	0.242557	0.411988	0.0523354	0.378812	0.185519	0.322263	0.0869384	0.435055	0.355414	0.424124	0.36812	0.188463	-0.116961	0.0551108	-0.269737	0.183866	-0.24058	0.229743	-0.119023	0.0964952	0.135062	0.275223	-0.147739	0.200691	0.273452	0.22186	0.308667	0.190083	0.136409	0.184053
Sig305	0.218876	0.141492	0.256989	0.152897	0.212515	0.142865	0.241922	0.0925061	0.120974	0.0853411	0.161929	0.237518	0.142475	0.189576	0.166118	0.235699	0.0692456	0.195542	0.159923	0.160022	0.256016	0.0641908	0.252674	0.0676087	0.157709	-0.00219701	0.277932	0.247158	0.173285	0.188049	0.0618424	-0.0427473	-0.0639224	-0.176269	0.027758	-0.176788	0.105013	-0.0882103	-0.00477079	0.0704381	0.0944266	-0.11911	0.146304	0.145275	0.246276	0.141289	0.190004	-0.0306847	0.172947
Sig115	0.35826	0.118509	0.560274	0.780284	0.316571	0.200224	0.297436	0.0786261	0.0416056	-0.0108506	0.424378	0.346088	0.256656	0.285597	0.321228	0.401892	0.047016	0.575117	0.0989353	0.322831	0.373123	0.0790605	0.48458	0.194756	0.134281	-0.147458	0.468438	0.544528	0.172026	0.266563	-0.00363881	-0.14256	-0.113452	-0.359725	0.12044	-0.303473	0.205911	-0.302104	-0.0590567	0.155386	0.139836	-0.185899	0.313054	0.113228	0.607418	0.11241	0.188449	0.0397136	0.14086
Sig176	0.55827	0.33272	0.546812	0.029544	0.365798	0.558151	0.443628	0.215164	0.349428	0.195098	0.484928	0.485284	0.34213	0.36765	0.518469	0.507373	0.127215	0.384917	0.368477	0.289237	0.551459	0.0737723	0.491155	0.324887	0.302674	0.0198685	0.591274	0.48721	0.456812	0.489761	0.175464	-0.219408	0.0979137	-0.382508	0.289854	-0.306114	0.324992	-0.22731	0.0755918	0.220013	0.357332	-0.178529	0.285518	0.277587	0.311482	0.386625	0.187773	0.287349	0.14723
Sig288	0.402333	0.213977	0.412146	0.0564436	0.320213	0.381156	0.304818	0.146073	0.181893	0.150756	0.345282	0.388241	0.254201	0.342943	0.370861	0.375826	0.0866209	0.291706	0.2736	0.229163	0.404933	0.0789803	0.359378	0.227034	0.230881	0.0130749	0.432104	0.368297	0.317217	0.355862	0.127305	-0.156392	0.063076	-0.296916	0.209176	-0.212229	0.258417	-0.179752	0.0488328	0.190756	0.248599	-0.126715	0.199634	0.237767	0.253455	0.280864	0.187591	0.153156	0.16684
Sig267	0.279781	0.226762	0.24481	-0.00443544	0.308449	0.214173	0.293819	0.176564	0.190817	0.166048	0.189295	0.275349	0.174964	0.251984	0.229248	0.279143	0.0631933	0.139542	0.256276	0.167529	0.283979	0.020164	0.290979	0.110891	0.189243	0.0693532	0.294645	0.250011	0.304017	0.259218	0.143939	-0.0616157	0.00583462	-0.223699	0.122577	-0.188557	0.173311	-0.0812519	0.018196	0.10111	0.188794	-0.126483	0.140815	0.256156	0.185302	0.201254	0.187199	0.0535245	0.215182
Sig384	0.286237	0.181417	0.306965	0.00857011	0.292764	0.241095	0.269015	0.164524	0.128648	0.13168	0.175782	0.296775	0.158653	0.217738	0.214524	0.287411	0.0903022	0.162235	0.199065	0.145135	0.29242	0.0229209	0.304623	0.103587	0.199215	0.00594507	0.329324	0.256785	0.218405	0.233325	0.0862574	-0.0905609	-0.0240196	-0.226796	0.0760007	-0.195141	0.126487	-0.133787	-0.00404946	0.0679817	0.134298	-0.124901	0.181788	0.139863	0.198607	0.182327	0.185816	0.00888611	0.216206
Sig452	0.42841	0.234816	0.39435	-0.00979463	0.354013	0.378077	0.339486	0.161153	0.20546	0.191762	0.29175	0.416725	0.245559	0.322124	0.34086	0.380663	0.108111	0.22215	0.31371	0.213206	0.399577	0.0562688	0.377677	0.191615	0.271242	0.00592754	0.421387	0.348673	0.355172	0.342179	0.13319	-0.134355	0.0436453	-0.28429	0.182079	-0.247201	0.223778	-0.16793	0.018024	0.133525	0.247536	-0.156758	0.211173	0.251331	0.234551	0.262743	0.185726	0.144284	0.181323
Sig431	0.228174	0.118672	0.267423	0.060703	0.27872	0.147878	0.226126	0.101171	0.077932	0.0628856	0.156007	0.242978	0.151058	0.171131	0.217432	0.205273	0.0687096	0.175028	0.164751	0.177257	0.253758	0.102179	0.22073	0.0646838	0.146142	-0.0328636	0.28723	0.23549	0.128111	0.184364	0.0535372	-0.0483084	-0.0423172	-0.167519	0.0471306	-0.156735	0.0971975	-0.0987009	-0.0277721	0.0612246	0.127019	-0.116658	0.129023	0.157883	0.221894	0.124117	0.18571	-0.0297189	0.17795
Sig533	0.50019	0.251206	0.497488	0.0967031	0.368986	0.474736	0.354682	0.166748	0.200147	0.140118	0.410763	0.407288	0.31163	0.32602	0.425075	0.423523	0.150565	0.347304	0.271701	0.28045	0.430123	0.0856386	0.437538	0.252719	0.321436	-0.0135687	0.498854	0.434358	0.36407	0.413093	0.13238	-0.202992	0.0708934	-0.358523	0.269779	-0.29492	0.301067	-0.2527	0.0203079	0.217478	0.305313	-0.169475	0.255382	0.284638	0.304655	0.291247	0.182025	0.21938	0.160419
[truncated: 317 more rows]
[truncated: 526 more columns]
