# Supplementary material for: Adoptive cell therapy targeting common p53 neoantigens in human solid cancers
Source: Research Square preprint supplement (doi:10.21203/rs.3.rs-916555/v1), 2021-09-24
Supplement: Supplementary file 1 [file d2803b28d84808cbbe64add0.pdf]

## **Adoptive cell therapy targeting common p53 neoantigens in human solid cancers**

Sanghyun P. Kim<sup>1</sup>, Nolan R. Vale<sup>1</sup>, Nikolaos Zacharakis<sup>1</sup>, Sri Krishna<sup>1</sup>, Zhiya Yu<sup>1</sup>, Billel Gasmi<sup>2</sup>, Jared J. Gartner<sup>1</sup>, Sivasish Sindiri<sup>1</sup>, Parisa Malekzadeh<sup>1†</sup>, Drew C. Deniger<sup>1‡</sup>, Frank J. Lowery<sup>1</sup>, Maria R. Parkhurst<sup>1</sup>, Lien T. Ngo<sup>1</sup>, Satyajit Ray<sup>1</sup>, Yong Li<sup>1</sup>, Victoria Hill<sup>1</sup>, Maria Florentin<sup>1</sup>, Biman C. Paria<sup>1#</sup>, Noam Levin<sup>1</sup>, Elizabeth Hedges<sup>1</sup>, Agnes Choi<sup>1</sup>, Praveen D. Chatani<sup>1</sup>, Shoshana Levi<sup>1</sup>, Samantha Seitter<sup>1</sup>, Yong-Chen Lu<sup>1¶</sup>, Zhili Zheng<sup>1</sup>, Todd D. Prickett<sup>1</sup>, Li Jia<sup>3</sup>, Jonathan M. Hernandez<sup>4</sup>, Chuong D. Hoang<sup>5</sup>, Paul F. Robbins<sup>1</sup>, Stephanie L. Goff<sup>1</sup>, Richard M. Sherry<sup>1§</sup>, James Yang<sup>1</sup>, Steven A. Rosenberg<sup>1\*</sup>

\*Correspondence to: [SAR@NIH.gov](mailto:SAR@NIH.gov)

a

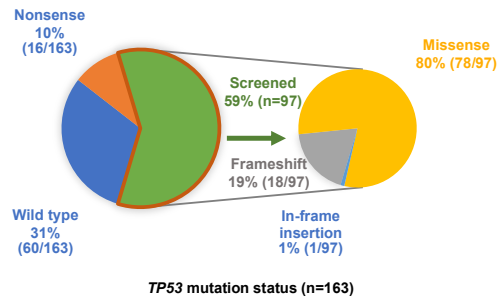

b

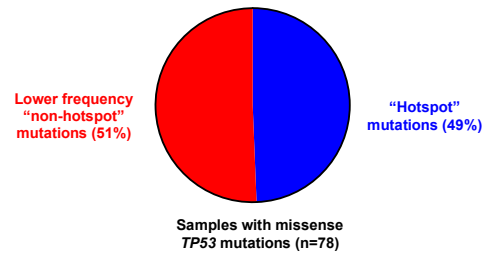

c

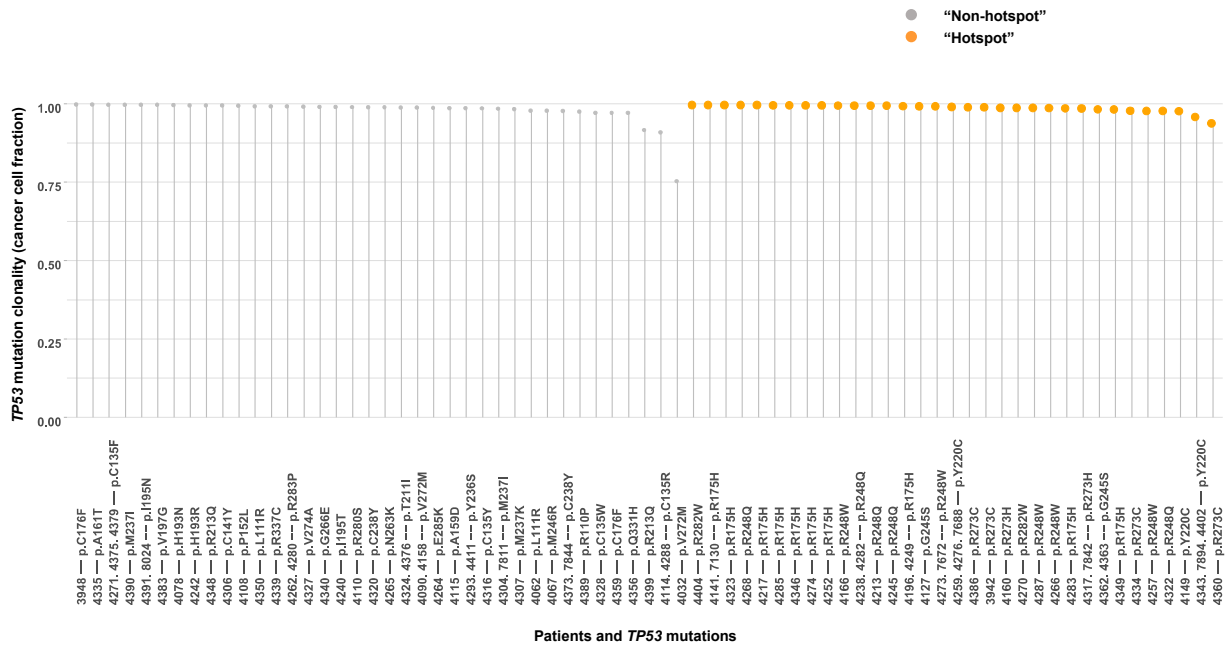

**Extended Data Fig. 1. Characteristics of *TP53* mutations in the Surgery Branch**

**cohort. a,** Pie chart showing the frequencies of somatic *TP53* mutations within the Surgery Branch patient cohort (n=163). Patients with missense, frameshift and in-frame insertion mutations in *TP53* that consisted 59% of the patients were subjected to the immunogenicity screening for *TP53* mutations. **b,** Pie chart showing the frequencies of “hotspot” and “non-hotspot” *TP53* missense mutations within the Surgery Branch cohort (n=78). **c,** Clonality of “hotspot” and “non-hotspot” *TP53* mutations. The cancer cell fraction values for *TP53* mutations generated from the whole exome sequencing results are plotted. Each dot represents the average clonality for three or more tumor fragments from a single patient.

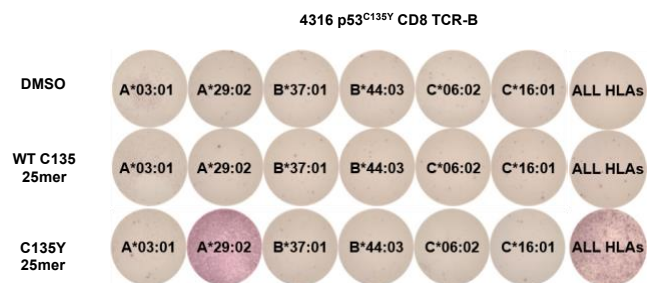

**Extended Data Fig. 2. Determination of HLA restriction of CD8 TCR-B isolated from patient 4316.** COS7 cells individually transfected with patient 4316's own HLA class I were pulsed with DMSO, wild-type or p53C135Y 25mer peptides and co-cultured with CD8 TCR-B-expressing healthy donor PBLs. ELISpot measurement of IFN- $\gamma$  secretion is shown.

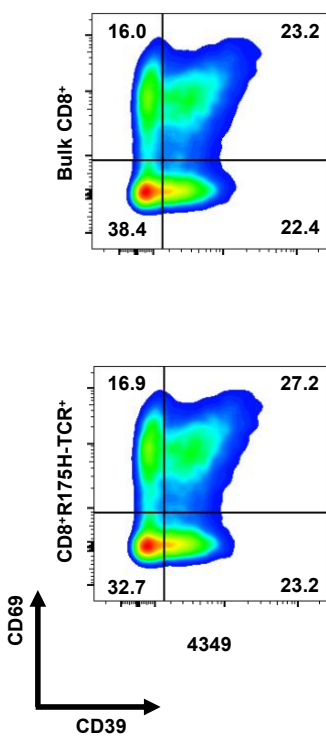

**Extended Data Fig. 3. Phenotypic analysis of antigen-specific T cells in the infusion products for patients 4349.** Phenotypic analysis of antigen-specific (R175H-TCR<sup>+</sup>) or bulk CD8<sup>+</sup> T cells from the infusion products for patient 4349 by flow cytometry. Bulk CD8<sup>+</sup> T cells (top panel) or CD8<sup>+</sup>R175H-TCR<sup>+</sup> cells (bottom panel) were stained for CD39 and CD69.

a

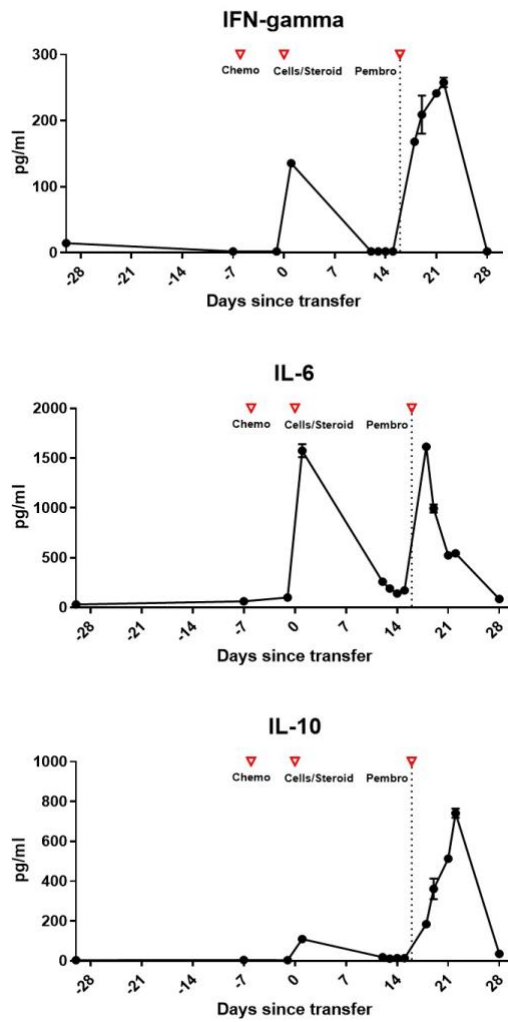

b

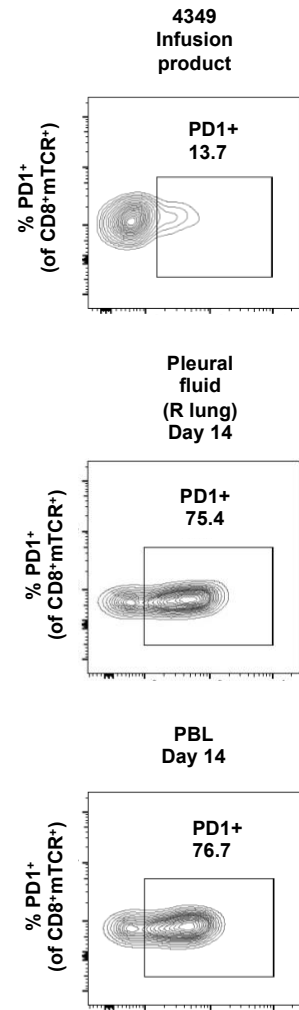

c

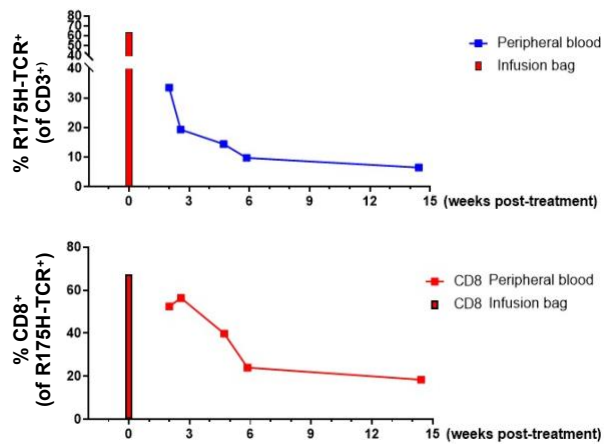



**Extended Data Fig. 4. Analysis of T cells and cytokines for patient 4349.** **a**, Serum cytokine levels of IFN- $\gamma$  (top), IL-6 (middle), and IL-10 (bottom) were measured by a flow cytometry-based LEGENDplex assay. **b**, Flow cytometric analysis of patient 4349's infusion product (top), pleural fluid at day 14 (middle), and PBL at day 14 (bottom) for PD1 expression. **c**, Persistence of R175H-TCR-expressing T cells by flow cytometric detection of R175H-TCR<sup>+</sup> T cells (upper panel) and CD8<sup>+</sup> T cells of R175H-TCR<sup>+</sup> T cells (bottom panel).

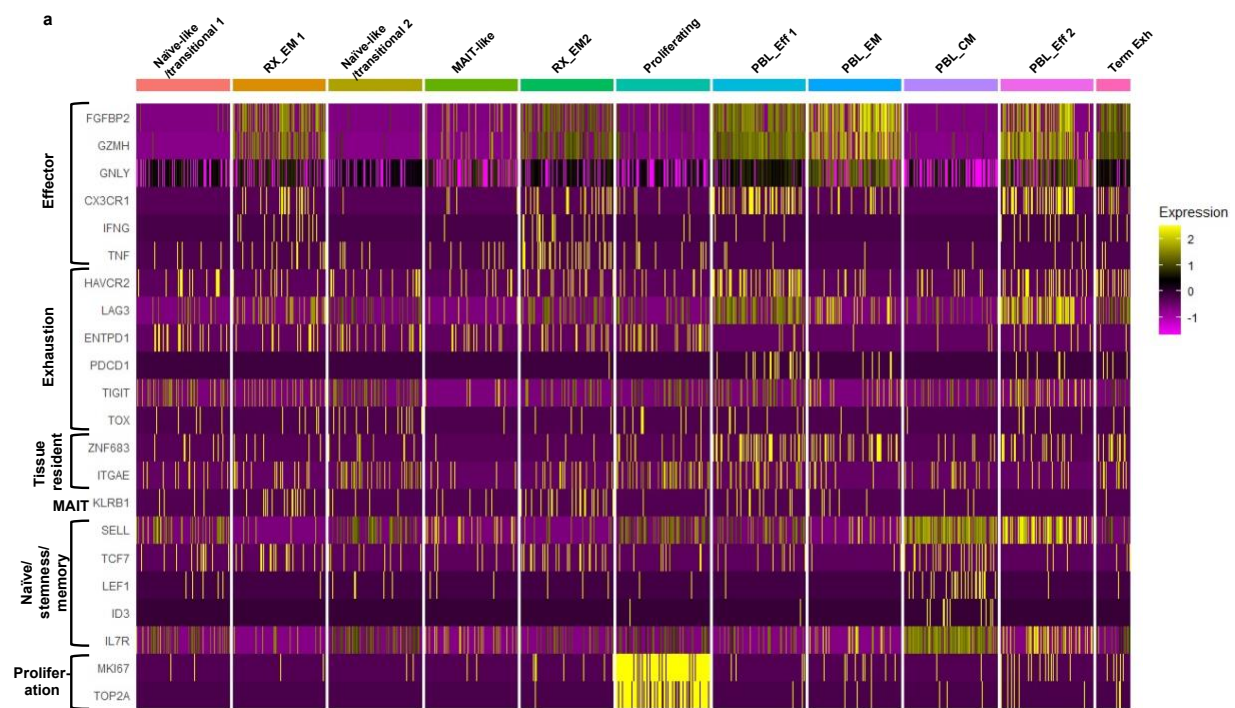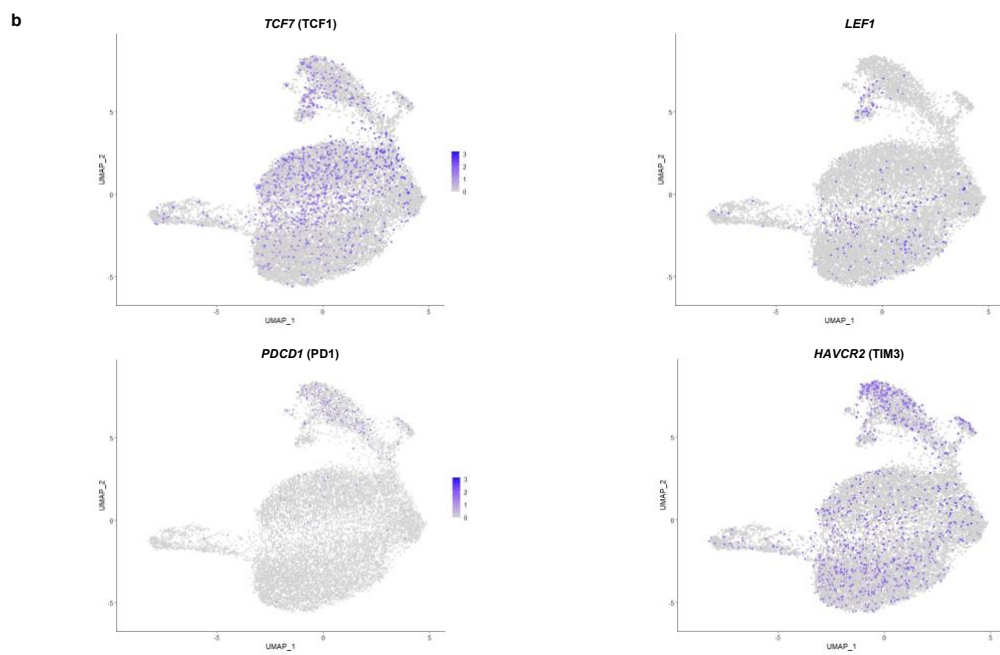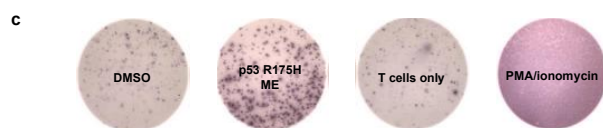

**Extended Data Fig. 5. Analysis of patient 4349's infusion product (RX) and PBL samples post-ACT. a,** Heatmap of selected genes across the clusters in Fig. 3F.

Expression from each single cell was down sampled to 100 cells per cluster for visibility.

**b,** Expression of indicated genes overlaid on the UMAP projection of RX cells and

PBL\_6w cells. **c,** Functional analysis of PBL sample at 4 months post-ACT. Peripheral

blood mononuclear cells were isolated by Ficoll and were subject to co-culture with

autologous imDC pulsed with the p53<sup>R175H</sup> ME or DMSO. T cells only and

PMA/ionomycin conditions were included as negative and positive controls,

respectively.

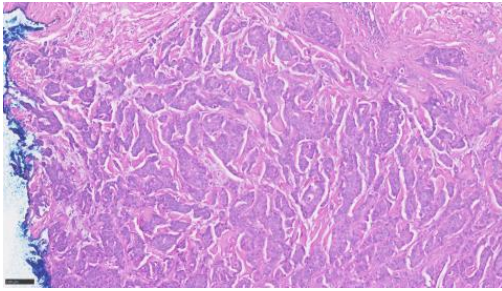

H&E

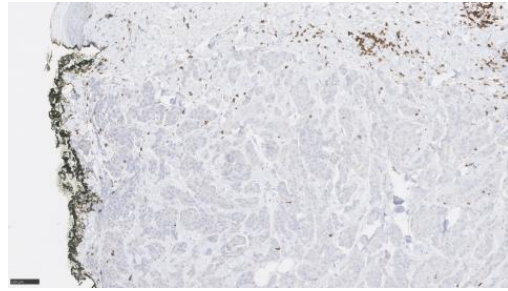

CD3

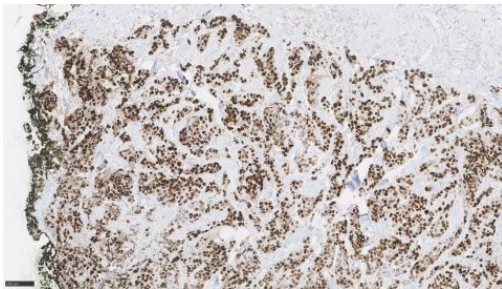

p53

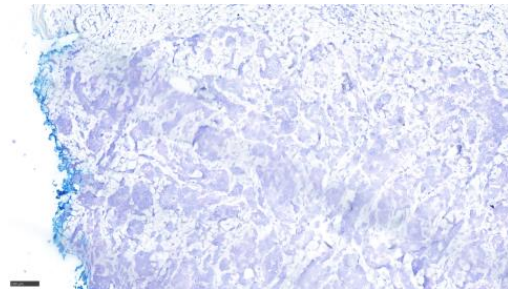

RNAscope (3' UTR of MSGV1)

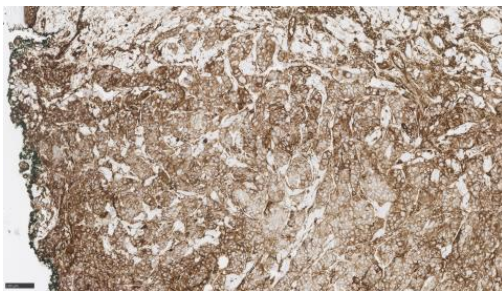

MHC I

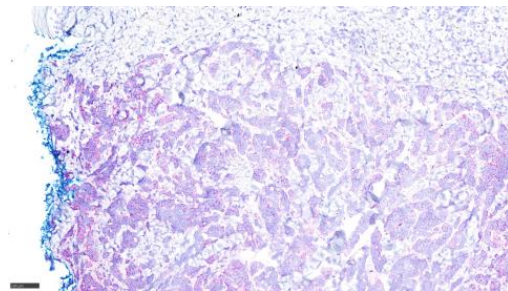

RNAscope [*PP1B* (positive control)]

**Extended Data Fig. 6. Analysis of the skin biopsies of patient 4349's progressing lesion.** Skin biopsies from patient 4349 at day 209 post-ACT were analyzed by an immunohistochemical and RNAscope analysis. RNAscope against *PP1B* was included as a positive control to ensure the quality of RNA of the specimen. Scale bar, 100  $\mu$ m.

a

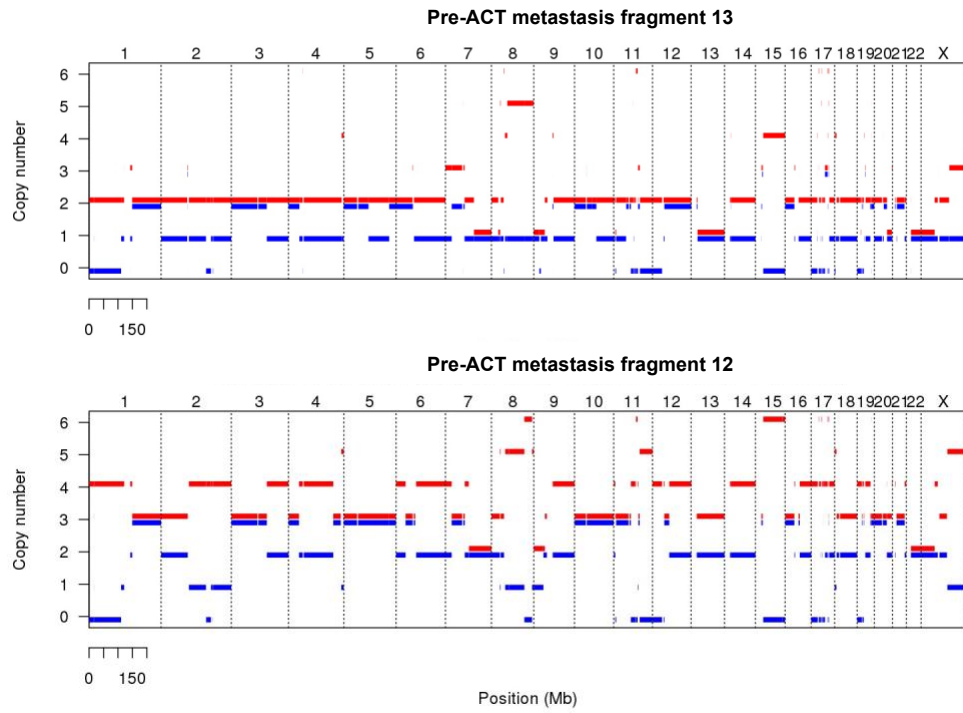

b

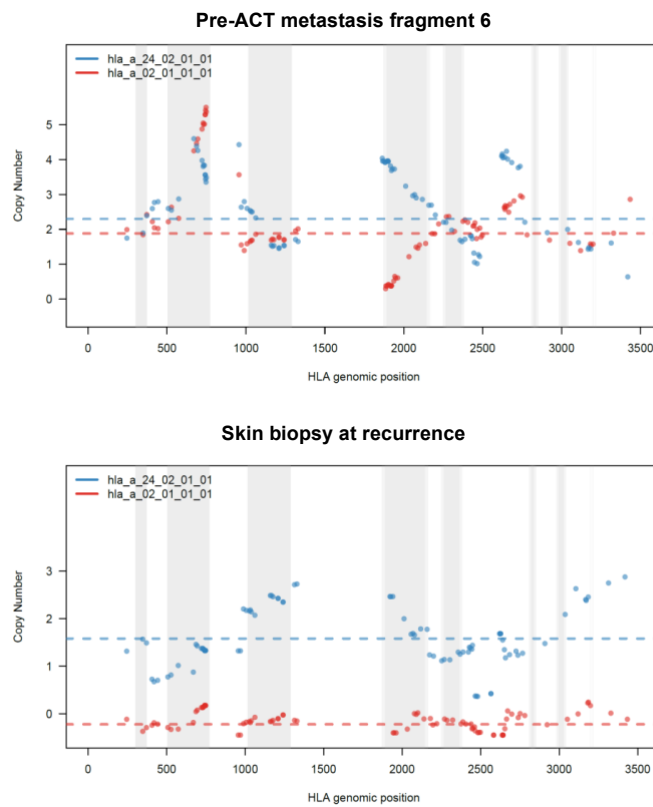

**Extended Data Fig. 7. Copy number analysis of patient 4349's pre-ACT metastasis sample and the skin biopsy at recurrence by WES. a,** Copy number analysis at the chromosome level. **b,** Haplotype specific copy number analysis for the HLA-A locus. Exons are shaded in gray and each dot represents a copy number for a single nucleotide polymorphism corrected for Log R ratio, B allele frequency, tumor purity and tumor ploidy. Dotted lines represent the median allele copy number.



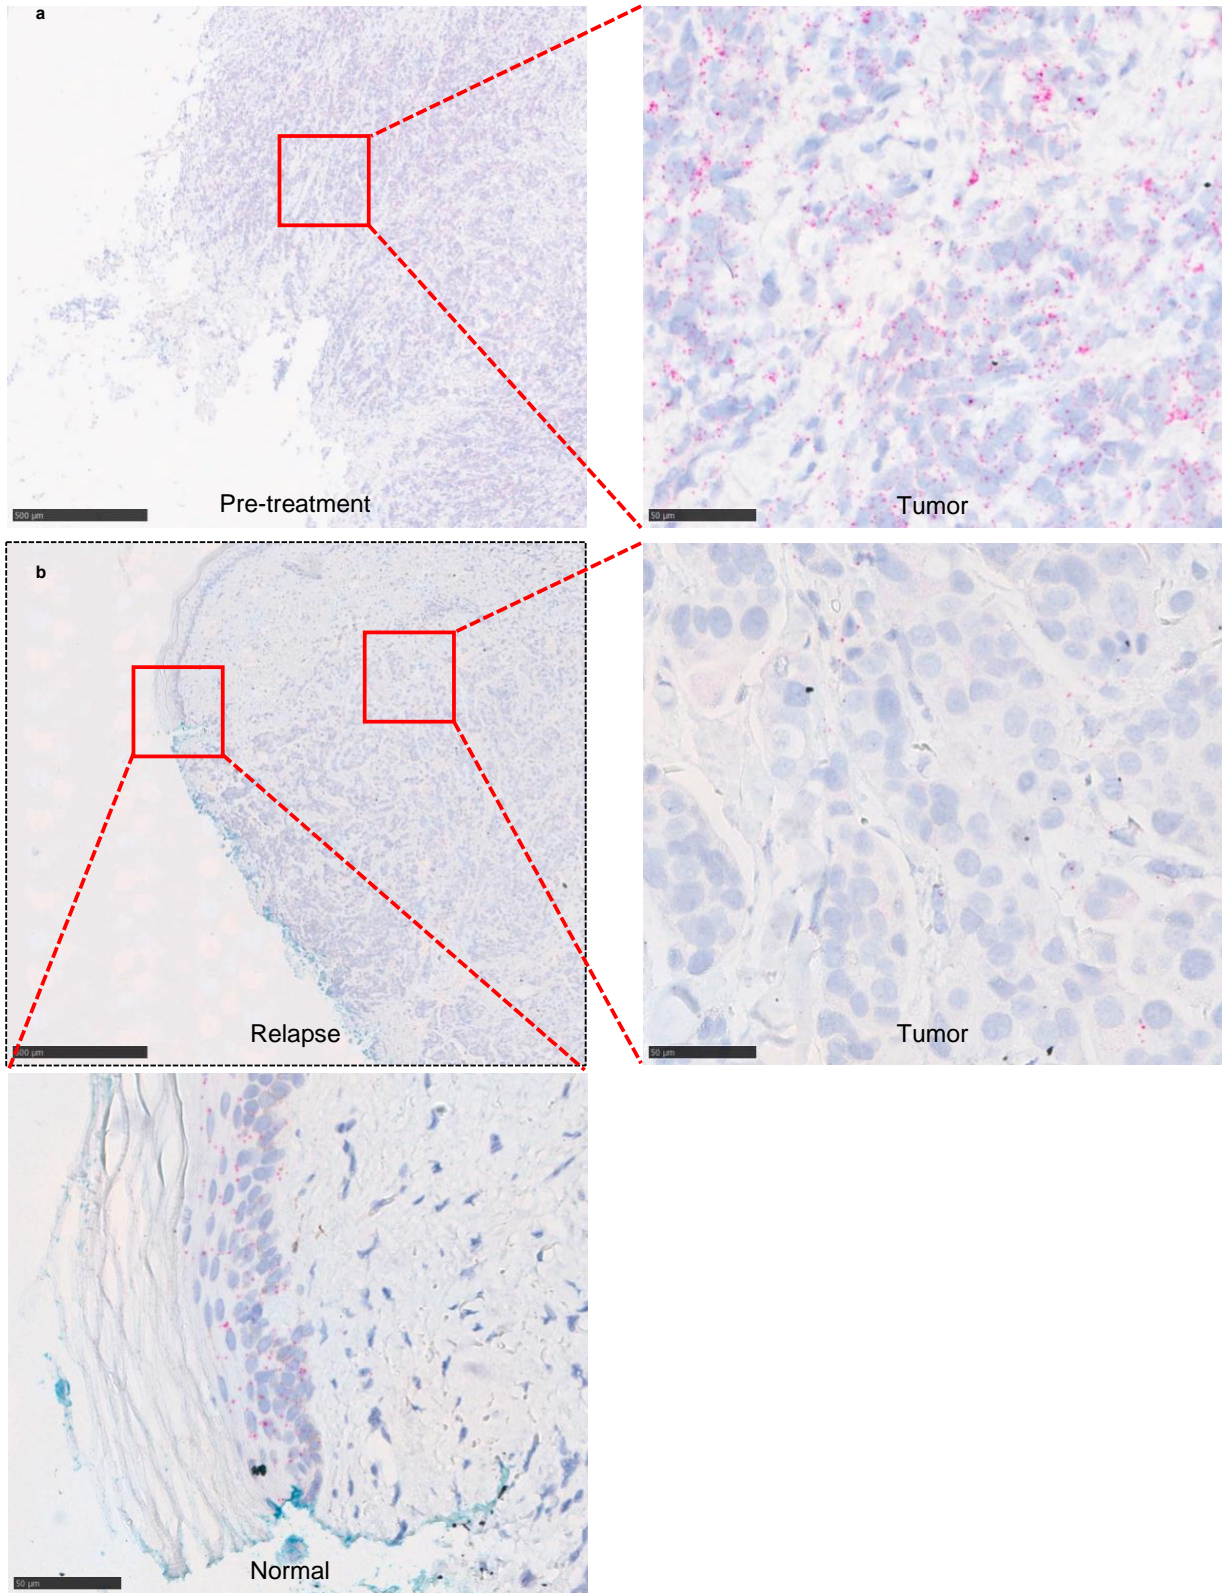



**Extended Data Fig. 8. Detection of HLA-A\*02:01 by RNAscope in the pre-ACT and progressing lesion biopsies from patient 4349.** Skin biopsies from patient 4349 before the ACT (**a**) and at recurrence at day 209 post-ACT (**b**) were analyzed by an RNAscope analysis using a probe against HLA-A\*02:01. **b**, From the relapse biopsy, the normal epidermis with intact HLA-A\*02:01 expression (bottom panel) and the tumor cells with a lack of HLA-A\*02:01 expression (right panel) are shown. Scale bar, left panel in A and top left panel in B: 500  $\mu$ m; right panel in A and top right and bottom panel in B: 50  $\mu$ m.
